# Supplementary material for: The PLK4 inhibitor RP-1664 demonstrates potent efficacy in neuroblastoma preclinical models through a dual mechanism of sensitivity
Source: Nat Commun. 2026 Jun 13;17:7531. doi: 10.1038/s41467-026-74061-5 (PMC13408883; doi:10.1038/s41467-026-74061-5)
Supplement: Supplementary file 3 — S Data1 [file 41467_2026_74061_MOESM3_ESM.xlsx]

## Sheet: Sheet1
Gene	RP1664.T10	RP1664.T26	DMSO.T10	DMSO.T18
CEP120	1.27046	338.91	1.04257	1.32373
PPP2CA	1.01251	283.166	0.801207	0.991815
SASS6	0.867638	148.177	0.708264	0.760399
STIL	1.06436	133.823	0.836769	0.713463
BAX	1.58898	123.022	1.15171	1.22822
RTTN	1.4482	122.855	1.03545	1.05325
TUBE1	1.53665	119.299	0.959213	0.676241
CEP41	1.64662	106.278	0.934576	0.780488
CRADD	1.79465	102.611	1.20663	1.41657
TUBD1	1.29783	100.942	0.728101	0.501388
PIBF1	1.96452	96.1342	1.12088	1.15944
TEDC1	1.78811	92.9804	0.90683	0.616019
PLK4	1.22833	91.6823	0.833815	0.669099
TEDC2	1.55226	89.8364	0.962881	0.641523
PPP1R35	1.48946	87.2873	0.810831	0.637023
CASP2	1.58909	83.3161	0.969443	1.09595
ZNF66	1.26195	75.5635	1.08326	1.21258
CENPJ	1.17573	73.7825	0.844159	0.786922
C2CD3	1.5876	71.6227	0.8093	0.904883
FOPNL	1.47622	54.1103	1.01646	0.988482
KIAA0753	1.42058	45.085	1.018	1.00011
SPICE1	1.43909	43.7058	0.943639	0.695356
WRAP73	1.66446	43.4482	0.820494	0.52459
CEP152	0.933408	42.8458	0.736542	0.682861
CEP44	1.26085	40.7318	0.798481	0.895843
BID	1.56227	39.4708	1.00744	0.955537
PIDD1	1.34811	39.0985	0.883265	0.951077
CEP135	1.27106	37.4037	0.815834	0.664281
CEP83	1.75614	34.9454	0.905242	1.00432
SCLT1	1.55204	30.711	1.05652	1.28257
DYNLL1	2.25283	26.9895	1.11403	1.23548
ANKRD26	1.38307	25.6381	0.966451	0.907928
OFD1	1.68054	23.5409	0.995517	0.945014
CEP295	1.09571	23.0239	0.821451	0.763897
PPP6R3	0.854999	21.3444	0.832815	0.851452
TTL	1.91242	18.0141	0.993937	1.11674
DENR	1.31753	17.7319	0.987562	0.961756
CCSAP	1.30108	17.2547	0.854972	0.887649
ATMIN	1.59441	13.0604	1.12114	1.29739
PPME1	1.28917	12.695	1.02302	0.925184
NKAPD1	1.57039	11.9588	0.84008	0.526335
PPP2R3C	1.38535	9.73433	0.830917	0.604625
ALMS1	1.26267	8.93944	0.870999	0.69787
CEP350	1.33734	8.61142	1.08395	1.29405
UGT1A1	1.2684	8.17211	1.22867	1.15828
USP9X	1.34893	5.563	0.827481	0.875803
DOT1L	0.700767	5.34082	0.307959	0.153745
RTL8A	0.951586	5.31178	1.00206	1.21659
KRTAP5-10	1.19664	5.28856	1.18988	1.09517
DPH3	0.770249	5.22693	0.566992	0.414383
MAP1LC3B	1.33468	5.10996	1.34046	1.32951
DDX3X	1.46247	5.08691	0.945785	0.976074
CCDC179	1.08165	4.79363	0.871901	1.10061
TBC1D31	1.30544	4.68689	0.919581	0.559951
ANKRD30BL	0.974608	4.44007	0.972671	1.02695
GPBP1L1	1.06348	4.42255	0.901839	1.01654
RCOR2	1.0505	4.35956	0.691172	0.582309
CTU1	1.00547	4.13336	0.585897	0.400711
CCDC77	1.35475	3.86131	0.939119	0.753244
TRA2B	1.07316	3.80768	0.951685	0.646414
CTNNBL1	1.13754	3.74561	0.581844	0.329141
TMX2	0.940446	3.71035	0.75585	0.680235
CCNC	0.918429	3.45981	0.58888	0.300285
MCTS1	1.15938	3.443	0.839567	0.786274
LCMT1	1.52925	3.40393	1.10371	1.10621
NR2C2AP	0.998456	3.32509	0.627446	0.23507
POU3F1	1.04218	3.29934	1.13421	1.0265
PAPOLA	1.37789	3.28387	1.10025	0.956679
SSB	0.916905	3.21535	0.994231	0.742722
MOCS3	1.20037	3.12146	0.523021	0.344057
CNOT1	1.05741	3.07506	0.856434	0.72011
UBE4B	1.13908	2.99793	1.11161	1.10536
THRAP3	1.19531	2.98163	1.06814	0.859043
DNALI1	0.880192	2.9098	0.872569	0.738913
ZNF138	1.30237	2.90306	1.40577	1.35842
ANP32D	1.07124	2.86009	1.07573	1.00862
DHX8	0.828155	2.80459	0.666668	0.623913
PCNT	1.35508	2.79683	0.993644	0.947862
MTHFD2L	0.921904	2.75091	1.13353	0.766382
CTU2	1.18437	2.74108	0.791808	0.755246
IL15	1.06431	2.73694	1.14852	1.00634
FUBP1	0.940303	2.71746	0.885142	0.836027
EPHA10	0.735486	2.69291	0.882741	1.06704
FGFR1OP	1.21323	2.59018	1.02341	0.912993
SKA1	1.08531	2.54139	0.878721	0.951694
C1orf122	0.801258	2.48156	0.844584	0.798374
ZNF628	1.12078	2.40641	1.14975	1.1743
RSRC2	1.18659	2.38499	1.04656	1.20586
ADSS2	0.832514	2.32995	0.852417	0.722121
KDM1A	0.969377	2.30112	0.727374	0.467267
RSPO1	0.865634	2.21382	0.871244	0.703899
ELP2	0.74713	2.20919	0.549838	0.286726
TCP1	0.513252	2.18255	0.576922	0.460688
FHL3	0.982596	2.15921	0.892087	0.976679
MEN1	0.823967	2.13167	0.690331	0.414839
KTI12	0.89525	2.10577	0.390025	0.188603
SAMD4B	1.38926	2.08873	0.911365	0.786589
NAA15	1.02105	2.08529	0.997321	0.698157
LUC7L3	1.05162	2.04215	0.494589	0.296445
SLC16A1	0.808543	2.04154	0.661289	0.398972
BAP1	1.39748	2.01457	0.867604	0.608829
URM1	1.02631	1.96468	0.690109	0.458397
CASZ1	1.00944	1.95619	1.10481	0.902614
OR8J1	1.31849	1.95282	1.36866	1.66081
ELP3	0.560624	1.94358	0.395156	0.0390659
CEP78	1.54412	1.90663	1.01552	1.02013
ORAI2	0.805067	1.85862	0.966508	0.864922
MACF1	0.825828	1.82467	0.844069	0.769503
TUBA1C	0.916066	1.82154	1.01443	0.740402
MASP2	0.870236	1.79145	0.811813	0.830008
EWSR1	0.95728	1.77508	0.865408	0.841654
NEUROD1	0.974516	1.76641	0.911716	0.902158
TMEM78	1.04959	1.7535	1.11756	1.35722
MBD3	0.896846	1.74994	0.750453	0.607334
IPP	0.863908	1.73844	0.946963	0.903851
BMP8B	1.18213	1.73564	1.17555	1.15544
CORT	0.955883	1.72087	1.01526	0.903006
C1D	0.942788	1.71822	0.726179	0.509677
MYCBP	0.876072	1.68368	0.784479	0.780177
XRN1	1.19415	1.68019	0.606642	0.216887
DRAP1	0.963072	1.64602	0.638906	0.305546
ZNF92	1.11218	1.64599	0.906085	0.995251
ELP5	0.608971	1.64437	0.213324	0.0540144
ARHGAP27	0.835879	1.64435	1.13296	1.13344
ELP1	0.649782	1.63887	0.404778	0.21713
SPAG5	0.998164	1.62126	1.13126	0.840953
MED23	1.07885	1.61714	0.703074	0.521375
MANEAL	0.995981	1.60232	0.734369	0.636271
ELP6	0.510983	1.58044	0.311011	0.119163
ZIC3	1.08935	1.56936	0.957874	0.750872
RRAGC	0.932166	1.55974	0.82859	0.704587
SCAF4	1.12912	1.55311	0.964199	0.634322
MNT	1.02959	1.53481	0.902829	1.02053
EIF3H	0.746292	1.51001	0.566225	0.543564
H4C2	1.08084	1.50673	1.17389	1.24537
METAP2	0.904579	1.49422	0.734316	0.780578
TRPT1	0.926282	1.47283	0.829411	0.904738
ELP4	0.552766	1.47205	0.327985	0.186585
BTAF1	1.1894	1.47109	0.748715	0.438121
PPP2CB	1.28159	1.46462	0.923465	0.764176
NDRG3	1.10183	1.43406	0.80438	0.900089
TTC14	1.05488	1.43323	1.01763	0.724282
PGD	0.665168	1.42114	0.316441	0.124714
N6AMT1	1.01987	1.42017	0.785617	0.297632
EIF4A1	1.07961	1.40964	0.626575	0.26627
VNN3	0.886281	1.40725	0.855753	0.935874
BTF3L4	1.07622	1.40664	1.1574	1.16416
E2F1	1.02695	1.3887	0.945621	0.919475
AK2	0.810343	1.3522	1.08296	0.836824
CDK5R1	0.827535	1.33313	1.078	1.02168
PDCD5	1.38545	1.32632	0.696979	0.312377
OGA	1.3149	1.30543	1.03365	1.2074
H2BC6	1.06076	1.29469	0.749542	0.702324
HERC1	1.09198	1.28966	0.930319	0.788516
CEP95	1.05363	1.28841	0.912905	0.759897
SCGB2B2	1.16526	1.28314	1.12853	1.13219
SVBP	1.08358	1.26165	1.30826	1.3186
RHBDL2	0.784841	1.2569	0.68616	0.625394
ZMAT3	1.11805	1.25218	1.1458	1.06152
MST1	0.797918	1.24998	0.803477	0.62687
SUMO2	0.959352	1.24995	0.912187	0.838903
CEP85	0.921371	1.24889	0.756473	0.785834
BCKDHB	1.08918	1.24639	1.06445	1.11615
LARP1B	1.03943	1.24596	1.06177	0.788872
RND2	0.87716	1.24255	0.967214	0.900923
GRIK5	1.12056	1.24209	1.04547	1.12919
PPP2R5E	1.1551	1.23276	1.17284	0.945207
PPP2R2A	0.769732	1.2292	0.878538	0.765673
PRMT9	1.08262	1.21855	1.08167	0.867882
NCOA6	1.11482	1.21481	1.08514	1.20618
CAPN12	1.10221	1.2111	0.887462	1.03047
C5orf34	1.19989	1.20679	1.03134	0.936033
IWS1	0.99396	1.20367	0.87215	0.752575
PCGF1	1.00306	1.20265	0.577805	0.334355
CEP97	1.11829	1.20208	0.948143	1.05789
GYPB	1.08893	1.19379	1.26911	1.03983
SAMHD1	1.25889	1.1807	0.964675	1.18604
CPSF4	0.623941	1.17668	0.450428	0.358945
HDAC2	1.09762	1.17351	0.883293	0.75409
SPEN	1.35313	1.16777	1.15572	1.01771
TAOK1	0.936347	1.16565	0.886428	0.956281
HPSE2	1.14106	1.16279	1.21898	1.31138
ITGB4	0.871282	1.13885	0.932299	0.872901
TOX4	0.920289	1.12512	0.747823	0.683344
OPHN1	1.08432	1.12274	1.07199	0.974577
INPP5B	0.775015	1.10264	1.01156	0.802943
ZCCHC12	1.0941	1.09305	1.11319	1.22191
SRRT	0.77365	1.09199	0.732367	0.708014
WDR87	1.13025	1.08015	1.04891	1.04901
HMMR	0.89115	1.07729	1.00272	0.898495
SCN1B	0.947114	1.07462	1.12416	1.07643
DHRS13	1.02835	1.06683	1.05633	0.982146
WAC	1.10738	1.06324	0.843819	1.02843
NRDC	1.09762	1.05481	0.763566	0.800087
CNOT11	0.856357	1.05428	0.849595	0.748206
CR2	1.04688	1.04997	0.924524	0.977989
NDC1	1.25753	1.04819	0.968592	0.792181
ADGRG7	1.1153	1.04802	1.09858	1.10126
LDB1	1.09155	1.04771	0.541519	0.19328
ABCD4	1.14806	1.04321	0.960125	0.925206
GJA9	0.94024	1.04174	0.812897	0.823196
ZNF691	1.19429	1.03803	1.091	1.1515
YY1	0.790921	1.02684	0.590915	0.525345
PLAUR	1.24293	1.02659	1.15719	1.25351
UGT1A9	0.833159	1.02628	0.79162	0.738725
RINL	1.0801	1.02415	1.04142	1.03878
H3C4	0.92884	1.02385	1.24953	1.29854
LYPD5	1.13436	1.02065	0.987352	1.093
USP22	1.15349	1.01985	0.978021	0.735127
GORAB	0.972753	1.01881	1.05313	0.885001
OR2L5	1.00744	1.01856	0.886572	1.05719
IGBP1	0.727064	1.01641	0.571093	0.530281
HPDL	1.12935	1.01399	1.23538	1.12737
BTF3	1.26765	1.01291	1.04689	0.987836
SRSF3	1.26108	1.01096	0.692398	0.412198
CASP9	1.31995	1.0094	1.08876	1.04993
MED13	0.828684	1.00766	0.595464	0.440443
SLC39A9	1.06577	0.997624	0.985298	1.0898
ARL13B	1.14903	0.996499	0.954773	0.950331
ZNF568	1.20512	0.993898	1.18003	1.03581
PGRMC2	1.16197	0.991081	1.17973	1.20606
BEST4	0.923342	0.990892	0.973241	0.887987
INTU	1.20904	0.987707	1.08343	1.4234
POC1A	1.49844	0.986347	1.13977	1.16638
OSCP1	1.19039	0.984343	0.923263	0.995821
CHERP	0.704612	0.978378	0.42927	0.505577
ZNF519	1.42569	0.973979	1.36815	1.20773
SRSF6	1.28051	0.969465	0.847047	0.806863
LRFN3	1.0457	0.967981	1.01133	1.14433
FUS	1.29633	0.962024	0.949973	0.959699
FNTB	1.02114	0.961324	0.541144	0.35687
TAF5L	0.837707	0.959984	0.645123	0.359582
FAM161B	1.00669	0.959403	0.92105	1.0275
HPCAL4	0.891355	0.957497	1.01987	0.992473
KMT2A	1.19597	0.956077	0.716222	0.4292
PDCD2L	0.920728	0.951576	0.938776	0.666303
WBP4	1.01669	0.949579	0.944663	0.870379
ELMSAN1	0.950998	0.949054	1.03133	0.896491
PRAMEF10	0.93625	0.94795	1.06836	1.09765
PCDH8	0.966155	0.943778	0.948028	0.922235
LURAP1	1.00457	0.933621	1.0786	1.12245
ZNF567	1.18045	0.929288	1.13284	1.17708
TMEM53	1.03388	0.928972	0.93858	0.942049
LRRC37B	0.880983	0.928742	1.13324	0.98883
ACYP1	1.0255	0.928507	1.09053	1.07855
BOD1L1	1.03766	0.927283	1.04425	0.931335
SELENOV	1.14028	0.924853	0.932357	1.08534
BNIPL	1.05348	0.920761	1.03182	1.00834
TTLL5	0.971894	0.919611	0.938639	0.895789
CRLF3	0.946339	0.918341	0.841811	0.802849
CELA3B	1.29409	0.915746	1.1207	0.966014
MARK4	1.14034	0.915084	1.18612	1.46344
CWF19L1	1.21545	0.914678	0.945906	0.83028
BCAS2	0.856822	0.911706	0.74743	0.644846
MAG	1.12747	0.910186	1.10072	1.10551
CEP162	1.1873	0.908754	0.992311	0.976487
ARTN	0.999592	0.904179	0.968548	1.17332
PRPF19	0.59153	0.90217	0.608669	0.459051
WTIP	1.26044	0.894459	1.09765	1.11192
DR1	0.943885	0.89412	0.844682	0.401121
POTEC	1.09026	0.89361	1.20622	1.28263
EDN2	1.13691	0.889239	1.03333	1.11721
CCNL1	1.06343	0.886903	0.724882	0.446878
MEAF6	0.958152	0.886153	0.793481	0.460177
CLIP3	1.0715	0.885212	1.03406	0.929295
OVOL3	1.02045	0.881021	1.05766	1.23409
VWA5B1	0.86937	0.880833	0.942218	0.938736
SPRY1	1.00782	0.880754	0.898725	0.987697
ARL2BP	1.01577	0.878853	1.32166	1.09541
REEP5	1.09325	0.878467	1.04687	1.04156
SH2B1	1.00757	0.876971	1.04197	1.05643
EBLN1	1.10537	0.871241	1.19683	1.04505
CEP63	0.946986	0.871053	0.999877	0.839639
PRRC2A	1.30503	0.869971	1.06771	0.927202
ACTN4	1.32026	0.865484	1.24626	1.15921
ZC3H4	1.07539	0.864402	1.1388	0.828787
ZPLD1	1.12352	0.863832	1.07125	0.969134
TAGLN3	1.14781	0.863624	1.03088	1.21392
FDPS	0.955952	0.862717	0.997484	1.08782
C4A	1.13552	0.860197	0.996139	1.34587
LRRC74A	1.14981	0.857196	0.895919	0.92633
RBM17	0.598471	0.852052	0.261878	0.180216
RBM15	0.968551	0.84994	1.07406	0.987879
NECAB3	1.01235	0.849939	0.926155	0.805774
ATP9A	1.27697	0.84977	0.972738	0.888409
DENND4B	1.14107	0.846717	1.14112	1.03627
SIRT2	0.978292	0.846089	1.03758	0.98577
MPP2	0.803372	0.844924	0.874241	0.861686
KLHDC1	1.00474	0.842138	0.957517	1.11826
TNRC6B	1.02488	0.840322	0.965588	0.959596
PLEKHH3	0.948405	0.840307	1.03948	0.989878
OR6C4	1.01441	0.839309	1.14384	1.13157
DPY19L3	1.15176	0.835837	0.994075	0.99829
ZNF573	1.10193	0.833211	1.20877	1.01079
DMKN	0.881582	0.829416	1.0392	1.03233
ZNF585A	1.2727	0.828711	1.19475	1.23751
MED24	0.559176	0.826536	0.404936	0.450419
HYPK	0.963335	0.825525	0.763036	0.290744
HNRNPUL1	0.94179	0.823735	0.919702	1.04288
KAT6A	0.935314	0.823471	0.879728	0.606634
AHSA1	1.1368	0.822644	1.09267	0.947501
ETHE1	1.01441	0.822024	1.02865	1.28956
KIRREL2	1.08292	0.816708	0.965998	1.21016
H2BC3	0.972872	0.816105	1.04903	1.04164
MTRR	0.986097	0.81511	0.800637	0.590857
ANGEL1	1.23818	0.81375	1.31497	1.30946
ZRSR2P1	0.987873	0.811243	0.876345	0.731416
ATG2B	0.995699	0.810962	1.11253	0.938095
CARNMT1	1.04503	0.810576	0.974366	0.821986
NAXE	0.956416	0.807828	0.998082	0.961021
LSM14A	1.08899	0.805475	1.05022	1.02896
S100G	1.04212	0.805046	0.96951	0.902877
LTBP2	1.13553	0.803447	1.05864	1.0971
CEACAM3	1.15564	0.802286	1.05609	1.07983
UPF3B	1.07733	0.79998	1.00307	1.19713
KRTAP10-5	0.91549	0.79935	0.957331	0.753875
SLC10A6	0.805161	0.794928	0.85892	0.969276
C19orf12	0.998829	0.793746	1.06774	1.13282
IL11RA	0.89514	0.790638	0.992945	0.907203
TPT1	0.65162	0.788609	0.227604	0.13822
FOXP4	1.00019	0.788216	0.924992	0.973624
ZNF566	1.01716	0.785432	1.10073	1.07428
DMBT1	1.08363	0.784767	1.10044	1.25821
EPB41	1.03623	0.783501	1.15927	1.14133
ACOT2	1.16408	0.783324	1.16451	1.14643
S100A7	1.27112	0.782903	1.4483	1.44214
MTRNR2L6	0.778964	0.782241	1.10092	0.901878
SGF29	1.03065	0.781809	0.75641	0.730457
DDX6	0.779289	0.781452	0.567146	0.216348
CLCNKA	1.04126	0.779679	1.04339	1.25945
CYP2A6	1.32797	0.779547	1.05299	1.08627
COP1	1.24662	0.778837	1.18116	1.14196
SKA3	0.981261	0.778803	0.861541	0.8786
PPP1R14B	0.774422	0.776963	0.773552	0.718785
SETD1B	1.20342	0.771777	0.726336	0.688178
ENTPD5	1.08124	0.771378	1.16112	0.985137
KIF15	1.02005	0.771369	0.954945	1.04472
TNKS	1.04287	0.771015	1.03912	1.04577
ACSM2A	1.12915	0.767089	1.18099	1.14569
FOSB	1.00522	0.765281	1.11686	1.27527
SEPTIN4	0.827659	0.765237	0.89897	0.832011
STRAP	0.935404	0.763179	0.670859	0.415855
FAM76A	0.881101	0.761506	0.891785	0.669723
GDF10	1.00872	0.75692	0.932151	1.01654
SLC7A9	1.21015	0.756635	1.05332	1.09458
ATP12A	0.996427	0.754018	0.983381	0.908161
EYA1	1.20267	0.753034	1.07074	1.03546
DCBLD2	1.16452	0.752474	0.886733	1.01891
HAMP	1.13878	0.751827	1.04192	1.24432
MITF	1.12857	0.751396	1.0937	1.26503
PCDHGA4	0.910585	0.751262	0.946359	0.823819
PAQR9	1.18321	0.748647	1.4169	1.33338
CDCP2	1.03411	0.746714	1.07134	1.0359
VTI1B	1.04906	0.746669	0.902142	0.933261
TBL1Y	1.0989	0.744865	1.11303	1.15865
ZNF875	1.16857	0.744645	1.21849	1.34728
HPN	1.14251	0.743199	1.03444	0.971598
KIAA0355	1.21429	0.742047	1.0451	1.03459
ANKRD18A	1.19071	0.741129	1.88621	1.84199
ZNF565	1.05766	0.740586	1.01555	1.10569
AASDH	1.10602	0.74021	1.10819	1.05595
DRG2	1.08535	0.740202	1.15063	1.01428
TNFSF13	1.04498	0.740143	0.938518	0.937228
C2orf42	0.987098	0.7396	1.05141	1.18965
PABPC4	1.28144	0.738304	0.963697	1.0931
KLHL11	1.25672	0.73755	0.998753	0.994973
GPR68	1.3318	0.737316	1.0708	1.02864
SLC25A31	1.08487	0.736653	0.964194	1.12147
PIGH	1.04676	0.736349	0.934701	1.02532
BCL3	0.997908	0.736092	1.13251	1.12422
RBM10	1.0994	0.734788	0.954904	0.844449
CXXC4	1.21284	0.734081	1.0947	1.16026
RASGRP4	1.20911	0.733747	0.994603	0.816649
GSK3A	1.18711	0.733636	1.22594	1.12266
DPF1	1.17209	0.732052	1.08903	1.06939
DPH5	1.0714	0.730728	0.807959	0.244648
THAP4	1.04655	0.729455	1.26746	1.09387
AFF4	0.796371	0.728952	0.806211	0.748811
DPH2	1.13189	0.728676	0.909364	0.620353
RUNX3	0.989101	0.728255	0.975963	0.832483
RHOF	1.14508	0.726447	1.16573	1.03135
POU2F2	1.05427	0.725476	1.15677	1.02507
ZNF738	0.938949	0.724844	0.868501	0.765569
DOHH	1.01117	0.723133	0.54545	0.218025
PDIA5	1.04157	0.721287	1.08809	0.936543
CSDE1	1.16769	0.721241	1.01434	0.997953
CZIB	1.03707	0.719373	1.2447	1.15967
PRKAG1	1.09755	0.717687	1.03527	1.16633
FRMPD2	0.994829	0.71694	0.984488	0.906579
EVI2B	1.09049	0.716803	1.12693	1.10105
CKM	1.05005	0.716198	1.14453	1.05846
MYO1D	1.24475	0.715003	1.13849	1.19512
LARP1	1.11492	0.714844	0.853578	0.732425
SPINT4	1.04962	0.7146	0.947731	0.844123
MAPKAPK5	0.980703	0.71406	0.962434	0.929217
SUPT20H	0.684766	0.713852	0.496317	0.398197
TRAF4	1.02952	0.713654	1.25034	0.860628
PSENEN	1.10719	0.712603	0.816787	0.731795
CEACAM8	0.885991	0.711657	0.95303	0.968
MPP5	1.12	0.709262	0.842694	0.851318
S100A10	1.10717	0.708732	0.907714	1.20282
BCLAF1	0.950697	0.707823	0.665227	0.701397
CATSPERG	1.13766	0.707543	0.987844	1.24529
TADA2B	0.719473	0.7052	0.523578	0.393887
SSC5D	1.30824	0.704694	1.29045	1.47043
VSTM2B	1.19854	0.704632	1.08919	1.24651
PRIMA1	0.997967	0.703881	0.900927	0.895027
EIF4EBP2	1.02043	0.703384	1.11235	1.17737
OR6C74	1.05711	0.702044	0.984791	1.10522
RAB21	0.978609	0.699815	1.0003	0.773939
CLASP1	1.32591	0.696498	1.03494	1.01937
SLC25A21	1.14736	0.695946	1.17828	1.23879
HECTD3	1.23342	0.693968	1.32151	1.31807
NME7	1.04604	0.6937	1.06999	0.9754
QTRT2	1.14651	0.690786	1.09322	1.01985
PHF20	1.06299	0.68616	0.895494	0.627018
DET1	1.14199	0.68604	1.14456	1.14302
CRYAB	1.17347	0.68569	1.23471	1.25108
EXOSC1	1.06817	0.683942	0.660032	0.33627
P2RY11	1.0214	0.683092	1.07488	1.06228
GABRA4	0.995218	0.68268	1.07498	1.26412
CD3EAP	1.0024	0.681477	0.86344	0.378357
ZNF571	1.04661	0.680912	0.939859	0.937447
NPTX2	0.860784	0.68052	0.942101	0.958129
FAF1	1.06241	0.680367	1.08597	1.21613
ZNF792	0.991205	0.680296	0.996302	0.992954
NUDT16L1	0.881569	0.679799	1.08929	0.979787
TMEM243	0.892718	0.679714	0.880767	0.817268
TFE3	1.10995	0.678827	0.980968	1.15891
SMARCC1	0.850756	0.677705	0.717082	0.535487
OR2B2	1.00614	0.676569	1.10287	0.894177
UBE2Z	1.04583	0.676372	0.871205	1.09222
CEACAM7	1.06945	0.675746	1.13816	1.22836
NPHS1	1.27789	0.675586	1.14222	1.08504
TNFAIP2	0.966178	0.674706	1.01714	0.916897
TAF13	0.825379	0.674234	0.602114	0.310115
TEAD2	1.22133	0.673823	1.24217	1.16553
NCR3	0.943502	0.673388	0.876194	0.773992
FAM71C	1.05912	0.672569	1.10642	1.25487
PPM1N	1.04044	0.67234	1.13072	1.32489
SEZ6	0.856597	0.671505	0.894351	0.924844
EXOC3L2	1.13556	0.670775	1.27296	1.29426
CCDC17	0.822468	0.670629	0.710259	0.854666
APLN	1.17158	0.670284	1.09815	1.15766
ID3	1.11611	0.670015	1.16665	0.895336
ARHGAP36	1.21642	0.669238	1.23422	1.23987
SESN2	1.05277	0.669106	0.895933	0.969874
OR2M2	0.924344	0.669098	0.777718	0.960204
ALG5	1.34016	0.668716	1.08119	1.20947
YLPM1	1.29326	0.665738	0.984455	0.868104
PHF6	1.10799	0.665427	0.916246	0.692095
CHST7	1.1307	0.66492	1.1789	1.24648
SMAD2	1.022	0.664845	0.737508	0.65675
TMEM61	1.12748	0.664187	0.937247	1.05812
L1TD1	1.10267	0.664035	1.20087	1.21135
HCST	1.28306	0.663212	1.30573	1.17525
CACNB4	0.972046	0.662639	0.929196	1.11895
RBM5	1.23404	0.662516	0.943028	1.07287
LEUTX	0.942483	0.659371	1.06933	0.974747
CCT6B	0.996773	0.656113	1.04902	1.13896
FAM210B	1.03207	0.655069	0.950162	0.791331
CDK8	0.776492	0.65427	0.979914	0.78151
HHIPL2	1.11307	0.652851	0.994705	1.11538
GATAD2B	1.0644	0.651458	0.981033	0.953591
MIRLET7BHG	1.0221	0.651196	1.10436	1.19235
TESK2	0.928776	0.65093	0.973401	0.880672
HUS1	0.77821	0.649892	0.806732	0.450642
ACTN2	0.87589	0.648247	1.17113	1.07763
ITPK1	1.14121	0.648204	1.3176	1.05406
SYNE4	1.02309	0.647467	0.96342	0.93725
ZMYND11	0.820555	0.647358	0.94236	0.824821
ZC3H14	1.06947	0.6466	1.04884	0.933049
UBIAD1	1.04358	0.645986	1.18944	1.29487
NRBF2	0.782607	0.645078	0.896957	1.02566
HRC	1.16238	0.644433	1.09082	1.50532
SLC6A17	1.01945	0.644246	1.14868	1.25428
NAP1L4	0.959675	0.644064	0.934358	0.721698
NEK2	1.03748	0.643848	1.17131	0.881051
ELOA	1.0036	0.642959	0.885333	0.709413
ASCL5	1.14033	0.642108	1.06131	0.962292
PPP4R1	0.943727	0.640818	0.861068	0.652408
LSM12	0.89339	0.638973	0.564915	0.390459
KIAA0586	1.2707	0.638871	1.09068	0.976503
SLFN11	0.985164	0.637951	1.11492	1.14478
PYROXD1	0.897967	0.637763	0.577415	0.187111
HOXC6	1.12391	0.63765	1.13373	1.11538
EVX1	0.920266	0.636512	0.915759	0.89438
RTN2	0.911089	0.636115	0.961778	0.958349
SERTAD3	0.921934	0.635781	1.00606	0.984102
ZNF232	0.896929	0.634147	1.01935	0.965204
PXT1	0.93604	0.633957	0.962743	1.02258
ZADH2	1.09736	0.633897	1.16493	1.18749
L3MBTL3	0.963743	0.63383	0.87769	0.946897
C19orf54	1.10412	0.633667	1.13475	1.03483
LDLRAD2	1.09767	0.632454	0.953698	0.971236
ARSJ	1.18818	0.631685	1.00254	1.08467
PIPOX	0.819522	0.631615	0.86732	0.79822
GPR173	1.10106	0.631489	1.1054	1.27696
WNT3A	1.27056	0.6304	1.15943	1.00986
EDEM2	1.03707	0.630341	0.888636	0.768436
IGSF1	0.925834	0.630121	0.816477	0.632193
CRIPT	1.08855	0.629859	0.988606	0.843051
PLD3	1.16612	0.629495	0.859673	0.934169
NPLOC4	0.7316	0.628396	0.807748	0.556258
ZNF570	0.955203	0.62784	1.07639	0.908862
KCTD15	1.18888	0.62764	1.07427	1.0363
IQCC	1.12263	0.627047	0.936072	1.03742
DUSP11	1.05382	0.626864	1.03539	1.13059
SMG9	0.895554	0.62656	0.881774	0.578186
ADH6	1.08233	0.62642	0.976931	1.14101
MAOA	1.04686	0.626131	1.16395	1.36457
B3GNT8	1.12155	0.624384	0.920873	1.08387
ARHGAP33	1.03491	0.623999	1.12116	1.03447
SLC30A2	0.878804	0.623975	1.06418	0.942479
CNTNAP1	1.00819	0.623962	1.17622	1.15319
TMIGD1	0.957952	0.623951	1.11539	1.11789
NUDT6	1.19193	0.623382	1.14233	1.15484
TRAPPC6A	0.9723	0.623272	0.953002	1.08333
TCEANC2	1.06715	0.623028	0.881789	0.969755
ZSWIM3	1.06377	0.62299	1.20097	0.920161
RBM39	0.913858	0.621774	0.626023	0.454037
WNT3	0.793698	0.621466	1.05637	1.18998
ZNF569	1.08164	0.620878	1.08261	1.00853
FXYD7	1.01819	0.620709	1.08009	1.08336
CFH	1.12297	0.619596	1.13489	1.16038
BDP1	1.15433	0.619473	0.941089	0.973272
CT45A5	0.894885	0.618746	1.15915	1.2304
FH	0.990114	0.618241	0.87264	0.402835
KRTAP10-12	1.24134	0.617911	1.07874	1.08872
SCAND1	1.09701	0.617537	0.999066	0.827397
STRIP1	1.05672	0.617367	1.03842	1.23915
SLC2A1	0.850138	0.617195	0.550747	0.361365
GAPDHS	1.16595	0.616389	1.10569	1.17505
LGI4	1.01682	0.616262	1.13935	1.19763
HACD2	0.850317	0.616076	0.822747	0.925301
RGS9BP	1.11418	0.615143	1.19431	1.44433
ZC3H12A	0.816001	0.614959	1.04889	1.07748
CKAP2L	1.02652	0.614748	1.22964	1.2031
MTA2	1.05563	0.614604	1.02343	0.674566
AKIRIN1	0.86108	0.614035	0.994892	0.91524
TMEM91	1.15177	0.612632	1.15922	1.24993
LGALS16	1.13194	0.611941	1.08032	1.08659
VTN	0.967033	0.611742	1.11304	1.22107
FAM241A	1.09632	0.611605	1.20911	1.05923
MAMSTR	1.07195	0.611305	0.835636	1.04729
HOOK1	1.14207	0.611075	1.10279	1.04803
UTP18	0.752867	0.610453	0.82414	0.724867
FAM151A	1.03963	0.609877	0.99453	1.01219
PCDHB7	1.00204	0.609037	1.31512	1.2491
ZFC3H1	1.18081	0.608648	0.710095	0.624701
DEDD2	1.01688	0.608504	0.953676	0.874122
CYP2B6	1.10074	0.607341	1.17916	0.889611
LIPE	1.04088	0.605717	0.915289	1.15689
C2CD4D	0.856089	0.60548	0.945088	0.887137
AP1B1	1.02412	0.604639	0.936679	0.871303
FOXM1	0.55659	0.604135	0.955226	0.826156
GRIK3	1.1446	0.603198	1.05458	1.1898
FBXO17	1.12011	0.60298	1.11685	1.03599
TFG	0.772274	0.602368	0.669939	0.651849
DNAJC8	0.979338	0.601672	1.18432	0.745518
MATK	1.09503	0.601538	1.10793	1.0646
COPRS	0.875005	0.601091	0.987036	0.714818
EVA1A	1.03666	0.600997	1.10571	1.14145
YTHDF2	0.937157	0.600212	1.0407	0.868854
NCOR1	1.05035	0.599637	1.15541	1.05835
LGSN	1.04126	0.598873	1.14033	0.995443
FFAR1	1.16169	0.598399	0.956186	1.05809
SNIP1	0.756797	0.59763	0.771675	0.781395
TBC1D23	0.913813	0.59622	1.08942	0.827035
WDTC1	0.812814	0.595727	0.809773	0.772881
OR6A2	0.972158	0.595549	0.950561	1.00952
PIK3C2B	1.12206	0.595379	1.0219	0.95277
PHOX2B	0.684435	0.593627	0.49014	0.455564
RAP1GAP	1.15697	0.593495	0.979434	1.00059
WDR88	1.00378	0.592967	0.965202	1.02359
SUSD4	1.02107	0.592836	1.16857	1.12238
FAM153CP	1.196	0.592767	1.0128	0.973983
MKNK1	1.06293	0.592435	1.00839	0.978363
AHDC1	0.894489	0.589465	0.90185	0.966542
GAST	0.842709	0.588767	0.834899	0.781416
QTRT1	1.07732	0.587866	1.01057	0.965626
EIF3K	0.987584	0.58715	1.00211	0.839591
FLVCR1	1.17965	0.58622	0.937707	0.924343
TMEM222	0.974274	0.585469	1.06633	0.891542
EPS15	1.03155	0.585222	0.954026	1.00692
SPINT2	1.08309	0.585119	1.15046	1.12649
SP1	0.928141	0.585055	0.776176	0.871346
GRIPAP1	1.07022	0.584824	1.08599	1.24568
EID2B	1.02012	0.58475	1.11774	1.05829
TARBP1	1.13083	0.584325	1.11877	1.14857
FILIP1L	1.0841	0.583781	0.965791	0.922496
CLIC4	1.02202	0.5828	1.09229	1.13307
TXNL1	0.874218	0.582053	0.989744	0.987352
RAB37	0.790161	0.581902	0.844985	0.826823
TMEM234	0.897832	0.581411	0.767444	1.0284
NFATC2IP	1.01639	0.580832	0.822877	0.891231
PGAM4	1.34264	0.58055	1.08086	1.21915
LGALS13	0.97907	0.579211	0.860358	1.24798
CNBP	0.949507	0.578673	0.907685	0.835968
PKNOX1	1.12742	0.578362	1.24481	1.25668
FAM187B	1.12533	0.577754	1.08489	1.09563
WDR27	1.20872	0.577285	1.20272	1.17378
SCG5	1.13837	0.577141	1.11048	1.10687
CXCL6	0.986772	0.577094	0.964939	1.03664
CCDC14	0.913071	0.577045	1.00795	1.00063
SIAH3	0.984215	0.577042	0.985111	0.874611
ARMC4	0.885312	0.576587	0.882395	0.77327
PTCHD3	1.07472	0.575666	1.00576	1.03815
BLVRB	1.10779	0.575629	1.0633	1.24419
ARNTL2	1.13375	0.575493	1.03689	0.94334
KRTAP5-9	1.55058	0.574887	1.10906	1.14891
MAPRE1	0.742344	0.574149	0.79798	0.747192
RNF135	0.915722	0.573947	0.858451	0.863067
MAP3K10	1.24929	0.573702	1.12111	1.16162
IFT20	1.05866	0.573682	1.1701	1.01609
CEP57	0.858531	0.573574	0.90183	0.869308
SEC63	0.998059	0.572336	0.850216	0.552389
RALGAPA2	0.959862	0.572227	1.05808	1.11903
RRH	1.28258	0.572163	0.986011	1.06655
PCDHA1	0.998233	0.571055	0.924283	0.906632
PLEKHH1	1.27367	0.57074	1.09245	1.21609
AJUBA	1.02878	0.570352	0.918908	0.958017
ZNF469	1.08521	0.570162	1.03546	1.03896
GAREM1	1.017	0.57016	1.0797	1.09031
RABAC1	1.09682	0.570134	1.23628	0.995321
SLC4A7	1.19117	0.570041	1.11086	0.984369
CD22	0.981319	0.569352	1.10898	1.05877
GRIN2D	1.27335	0.568857	1.30827	1.21993
KBTBD7	1.134	0.568623	1.03626	0.970826
RRAGD	1.04048	0.568381	1.08415	1.18512
PFN4	1.0576	0.568018	1.01482	1.23056
DHX16	0.890467	0.567144	0.780702	0.723088
KEAP1	1.18726	0.566296	0.891213	0.790215
ZNF599	1.02243	0.566203	0.91001	0.917889
KIAA0087	0.758694	0.566197	0.815617	0.796994
LCK	0.951017	0.565952	0.982733	0.993967
OR9G1	0.886698	0.565784	0.824312	0.895641
KCNJ6	1.14561	0.565654	1.10536	1.32726
NBAS	0.575195	0.565603	0.570072	0.417979
ATPAF1	1.14696	0.56475	1.24304	1.17348
UIMC1	0.884743	0.564477	0.994626	0.749588
FNBP4	0.921586	0.563925	0.927979	0.787797
ELANE	0.904966	0.563508	1.02488	0.798124
ATAD2B	1.0346	0.563463	1.21906	1.13503
MIIP	1.00672	0.563402	1.12289	0.964389
DCAF7	0.650576	0.562802	0.444714	0.146414
LSAMP	1.30639	0.562451	1.19422	1.16545
INO80D	1.0559	0.561872	1.23884	1.00689
SYT11	1.00835	0.561835	0.978142	0.946243
CLPTM1	0.893307	0.561297	1.0377	0.964635
C5AR2	1.1998	0.560488	1.05484	1.14269
TGIF2	0.718903	0.560462	0.690925	0.389017
VRTN	0.927706	0.560105	0.955954	1.02785
BATF	0.988996	0.55999	0.84884	0.890113
MEF2C	0.923068	0.559772	0.845528	0.974446
LRRK1	0.960267	0.559332	0.993302	0.973692
PTGER2	1.17404	0.559273	1.11485	1.01044
DEPDC5	1.01009	0.559162	1.08387	0.883183
PADI2	1.12037	0.559153	0.957262	0.854251
MTF1	0.788232	0.559046	0.589356	0.387143
AGO3	1.01751	0.558504	1.12592	1.0376
NOL4L	0.86364	0.558485	0.931668	0.981679
OR51F1	1.19173	0.557969	1.07241	1.05272
GUCY1A1	1.16514	0.557862	1.35838	1.28655
NEK9	1.22223	0.557673	1.11159	1.29049
ALDH4A1	1.11413	0.556667	1.37572	1.32249
SKP1	0.629132	0.556176	0.559628	0.261253
ABI1	0.96408	0.556016	1.00535	0.860007
ZNF229	0.9458	0.555953	0.930003	0.992293
TBX19	1.00616	0.555722	0.996542	1.15087
ECH1	0.950835	0.555607	0.929102	0.833965
PLAGL2	1.01967	0.555557	1.02046	0.960426
RAB34	0.958373	0.554917	1.02985	0.942721
HR	1.08155	0.554618	0.98389	1.42398
MYO18A	1.04676	0.554256	1.0391	0.994346
MED12	0.677017	0.553563	0.485198	0.357748
SARNP	0.860622	0.553038	1.02454	1.0027
ARRB1	1.20166	0.552864	1.1454	1.25236
PFN1	0.890822	0.552666	0.977108	0.768181
ZNF146	1.03573	0.552489	1.06911	1.24754
TAF15	1.01289	0.551949	1.10682	1.11961
KCTD12	1.04697	0.551511	1.12991	0.975937
PCDH11Y	0.997811	0.551149	1.16431	1.14051
CPT2	1.19025	0.550039	1.06477	1.02413
DBNDD1	1.06058	0.550005	1.1732	1.23201
CYB561D1	0.954252	0.548802	1.10018	1.09153
CSRP3	1.03507	0.548743	1.03249	0.98486
PHF12	0.833553	0.547773	0.836754	0.491257
ZNF793	1.01694	0.547695	1.09909	1.12194
TDG	1.00307	0.547675	0.891346	1.00241
KIF9	1.25448	0.547428	1.24335	1.36714
CCDC190	0.974173	0.547222	1.02303	1.01629
CEBPA	1.11173	0.54679	1.0135	1.09341
SDF2	0.8079	0.54661	0.868545	1.04662
CWC27	1.06956	0.54619	1.00433	0.859667
TFEC	1.10228	0.545112	1.01341	1.04711
SHMT2	1.03681	0.544778	0.930437	0.867552
ACOT4	1.15836	0.54463	1.10665	1.03291
TMSB10	1.22336	0.54461	1.18573	1.05999
ECM2	1.22089	0.544514	0.994669	0.96806
FNDC8	0.86279	0.544247	0.90234	0.87032
SLC6A16	1.04724	0.544131	1.07527	1.11237
NPAS1	0.916236	0.543739	1.06848	1.03899
HOXB2	0.905233	0.543168	0.955563	1.03301
KPNA6	1.14712	0.542768	1.25179	0.982366
CCNT1	1.14785	0.541687	1.12033	1.28277
BBS12	0.923122	0.541635	0.984966	0.970243
KAT2A	0.943325	0.541284	0.839756	0.650662
UCP3	1.27138	0.540714	1.14034	1.1605
ANKRD13B	0.83005	0.540681	1.11561	1.03031
SLC35A3	0.917936	0.539891	0.941007	0.986596
OR10T2	0.945895	0.53905	1.10525	1.01708
FBLN1	1.17968	0.539049	1.15691	1.13045
PSG5	1.0938	0.538806	1.16595	1.12311
KLHL4	1.07246	0.538215	0.975213	1.10697
CDC73	0.85053	0.537538	0.957759	0.746316
EVA1B	0.945447	0.537477	0.997635	0.889321
SLC5A7	0.947837	0.536809	0.932212	1.01454
KLK2	1.15214	0.536266	1.00937	1.16224
HPGDS	1.07175	0.536047	1.10705	1.10199
NPY4R	1.03288	0.53588	1.07923	1.11808
CHST8	1.14473	0.535872	0.944969	1.05205
HMGB4	0.926828	0.535544	0.938548	1.07101
ANKRD27	1.04449	0.535516	0.892984	0.986098
ZNF540	1.03804	0.535507	0.987807	1.04751
ETV2	1.22959	0.533625	1.09427	1.05834
RAB15	1.06884	0.533223	1.10873	1.15911
SMOC1	0.981987	0.532131	0.99009	1.08054
ZNF626	0.96271	0.531442	1.19803	1.12273
DUSP27	1.0948	0.531325	0.891372	0.93373
LONRF2	0.967142	0.530562	1.08319	1.20618
NFKB1	1.04123	0.530544	1.10197	1.20043
NKTR	1.13884	0.530348	1.19943	1.09259
TRIM25	0.856582	0.530291	0.942078	0.818218
DCAF5	1.07437	0.530229	1.12788	0.982167
NOSIP	1.07081	0.530079	1.0294	0.882884
AEBP2	0.921669	0.529996	1.04547	0.96113
MOB3C	0.953244	0.529783	0.970405	1.06898
POPDC3	0.924493	0.529594	0.851669	0.968864
F5	1.06769	0.529548	1.02372	1.18252
APH1A	1.11841	0.528994	1.1064	0.827184
SLC9A1	0.953565	0.528906	1.02602	0.923565
ACER3	1.03958	0.527332	1.03941	0.98186
GBP6	1.12812	0.527285	1.15856	1.11932
NFIB	0.973824	0.527218	1.18391	1.11446
EPHX1	1.00861	0.526856	1.09838	1.06281
HMX3	0.80062	0.526648	1.05189	0.956781
C12orf77	1.24933	0.526401	1.00473	0.979679
SERPIND1	0.882999	0.525077	0.958975	0.991479
GGNBP2	1.07352	0.524786	0.90712	0.824221
MUC1	1.09318	0.52236	1.05359	1.29066
ZFYVE26	1.33373	0.52228	1.01844	1.04962
ZNF2	1.13141	0.521914	0.942133	1.0275
EPHA8	1.22074	0.521512	1.12205	0.841046
PIRT	0.986452	0.521505	1.09164	0.991053
HEPHL1	1.13627	0.521321	1.26457	1.2267
ELF3	0.979334	0.521212	0.988975	1.19197
ZNF526	1.1143	0.521027	0.992695	1.00253
DDRGK1	1.08584	0.520939	0.890804	0.803788
ZNF829	0.969398	0.520444	1.11482	1.14717
PPP3CB	1.04914	0.519783	1.07002	1.1445
TTC22	1.17906	0.519723	1.0405	1.00851
PPP1R36	0.867099	0.519123	0.97335	1.06101
EVPLL	1.22044	0.518861	1.21892	1.05785
TPBG	1.02747	0.518742	1.15668	1.20969
TOR2A	1.057	0.518355	0.953576	1.02859
EGLN2	0.950504	0.518309	0.881978	0.919209
FLCN	1.06743	0.517669	1.08027	1.11714
HMOX1	0.952507	0.51732	1.02607	1.15053
CPB2	1.00483	0.515852	0.947301	0.98174
UNC119	0.822273	0.51571	0.941271	0.925995
TLX2	1.0186	0.515479	0.742553	0.522578
MOSPD2	0.963562	0.515098	1.15165	1.14999
RELB	0.99298	0.513732	0.940108	0.846433
RSKR	0.819645	0.513471	0.9546	0.8882
DAZAP1	0.957941	0.513173	0.883427	0.764492
OGFR	1.03878	0.513031	0.996368	0.888149
SACS	1.0498	0.512823	1.01864	0.878889
NT5E	1.11587	0.512767	1.10113	1.05459
UPK1A	1.13607	0.512564	1.17305	0.979557
IGFL4	0.932237	0.512362	0.980224	1.06003
SLCO2B1	1.11825	0.512215	1.20393	1.22912
ELAVL2	1.12078	0.51217	0.919082	0.947081
NEUROD2	0.862882	0.51129	1.13002	0.944251
RPF1	0.601549	0.511255	0.440536	0.525639
CST4	1.18462	0.511146	1.02143	1.10815
TEX101	1.09525	0.511095	1.2228	1.11086
SLAMF9	0.791907	0.510897	0.915567	0.829708
ACVR1	1.04342	0.510591	0.884795	0.800974
TNIP3	1.24874	0.510555	1.0703	1.24901
MUC16	1.03381	0.510408	1.07746	1.07815
STEAP4	1.16782	0.510347	1.00574	1.12891
RDH11	0.944451	0.509917	1.02207	1.10915
PSEN1	1.20935	0.509211	1.11026	0.998348
GGN	0.96361	0.509117	1.04399	0.896256
CYP2S1	0.928048	0.508981	0.948934	0.987924
APCDD1L	0.991891	0.50837	1.09006	0.893639
ASB13	1.15464	0.508107	1.15756	1.19608
CNNM1	0.961974	0.507899	1.2566	1.06873
IGSF23	0.990846	0.507815	1.00012	1.06798
ZHX2	1.20799	0.50773	0.982904	0.902023
RNF214	1.09943	0.507369	0.929126	0.838397
RNASE4	1.06037	0.507269	1.15352	1.26812
HEYL	1.26359	0.506846	0.978707	1.01682
COX8C	1.01325	0.506757	1.02348	1.20065
FSIP1	0.936232	0.506021	1.09004	1.09895
CFAP57	1.00917	0.505872	1.01407	0.998567
TXNDC11	0.923574	0.505765	1.00726	0.90958
TUBA3C	1.1117	0.50561	1.13166	1.22402
KRT33A	0.954206	0.50531	1.08795	0.963788
WASHC3	0.937548	0.50508	0.99403	0.945056
KIAA1522	0.904919	0.504696	0.979332	0.965423
GDPD5	1.10551	0.504671	1.12316	1.17041
RFPL4B	1.18733	0.504485	0.968172	0.795287
POFUT1	1.11377	0.504485	0.877978	1.06037
APBA3	1.05951	0.503798	0.985954	0.925395
C17orf97	1.03337	0.503257	1.02586	0.928794
PAXIP1	0.77956	0.50287	0.959909	0.67081
DLST	0.814208	0.502643	0.747766	0.466026
SNTA1	1.03437	0.502444	0.948593	0.902821
NSUN6	1.07737	0.502037	1.04113	1.18898
CECR2	1.06307	0.501906	1.11604	1.12687
FBXO7	0.964744	0.501868	0.966018	1.09192
GLIPR2	0.881424	0.50177	0.904058	0.866845
SIX6	1.02488	0.501177	0.95208	1.12882
DCAF4	1.0952	0.500845	1.1369	1.1157
LRP3	1.10464	0.500602	0.935294	1.0436
PHETA2	0.992933	0.500522	1.14903	0.970801
SEC14L1	0.930609	0.500498	0.831605	0.648935
COX7A1	1.03683	0.500269	0.993969	1.06961
KCNK6	1.33477	0.500058	1.22382	1.39108
MAGEA4	1.11484	0.499822	0.994334	1.1432
IL18R1	0.902283	0.499578	0.922128	0.980031
ACSF2	0.918248	0.499335	1.03552	0.980018
ADIG	0.926765	0.498839	1.03273	0.951099
CPSF7	1.26076	0.498295	1.20607	1.29686
KRTAP10-11	1.13568	0.49798	1.09472	1.00747
NTPCR	1.02098	0.497827	1.14516	1.08612
NPRL2	1.22288	0.497311	1.2516	1.13849
STARD5	1.25112	0.497299	1.34832	1.27407
ALKBH8	1.0722	0.497076	0.964502	0.829534
TDRD12	1.17928	0.496935	1.09772	1.04426
SMAD4	0.801627	0.49688	0.744884	0.509976
POU3F4	1.06554	0.496763	1.22254	1.31012
CCT3	0.636343	0.496628	0.387868	0.328567
ITIH4	1.09672	0.496587	1.20272	1.16824
GPR12	1.10411	0.496142	0.942212	0.927092
ESPNL	1.14835	0.496014	1.31756	1.24221
SENP7	1.29058	0.495952	1.01583	0.962779
TWIST1	0.843621	0.495714	0.784195	0.551406
HVCN1	1.03458	0.495714	1.29487	1.15448
NEUROG2	1.01299	0.495648	0.92302	0.948921
ZNF836	1.13465	0.495623	1.06956	1.21857
HSPG2	0.920189	0.495442	0.824616	0.952002
JDP2	1.02163	0.495002	1.05942	0.899997
ITPRIPL1	0.975884	0.494984	1.05362	1.19558
RASGRP1	1.05732	0.494781	1.14112	1.14111
MATN4	1.15397	0.494748	1.02314	0.837488
NUP188	1.24772	0.49398	0.7725	0.509646
GTPBP1	1.18046	0.493641	0.790876	0.65183
FAT4	1.10792	0.493448	1.09453	0.905559
EPHA6	1.03097	0.493426	0.861392	0.840787
PLD6	1.12818	0.493314	0.999046	0.991689
JPH2	1.04503	0.492924	1.0603	0.982665
ZNF658	1.04746	0.492691	1.08826	0.84602
HOXC9	1.12249	0.49227	1.15573	1.08266
KCNH3	1.25126	0.492214	1.20707	1.04145
TBCK	1.08888	0.491891	0.993868	1.26283
PAFAH1B3	1.07883	0.491848	0.976685	1.01891
PGM1	1.04006	0.491581	1.19314	1.12773
CEACAM16	1.14313	0.491316	1.22589	1.12061
TM9SF4	0.941882	0.491209	0.839383	0.921569
ZNF527	1.12918	0.491191	1.14258	1.15372
CD82	0.993079	0.491078	1.05342	1.02128
DEFB126	1.15313	0.490662	0.785056	1.04297
ENAH	0.847715	0.490459	1.05759	0.716275
MYL2	1.02152	0.490456	1.11362	1.29309
HCLS1	0.886898	0.490408	0.826739	0.990867
ACAT2	0.925283	0.489958	1.01805	0.927553
TBC1D17	1.11321	0.489811	1.01516	1.08221
DHX34	1.30725	0.48975	1.28031	1.26664
DPM1	0.948737	0.489742	1.02854	1.08331
PPIL1	0.968443	0.489682	1.03721	0.586695
DENND11	1.04899	0.489458	1.1019	1.04863
CD1A	1.13264	0.48931	1.15045	0.933798
TENT5B	0.88273	0.48927	1.03471	0.806334
STXBP5	0.840806	0.488986	1.09642	0.93096
CCDC120	1.22809	0.48815	1.00533	1.00392
ZC2HC1C	1.00658	0.487973	0.914389	0.999608
FBLN5	0.982171	0.487645	0.893004	0.892257
TMC3	1.02809	0.487387	1.02659	1.18504
PARP16	1.06192	0.486585	1.13996	1.31739
WDR37	1.09239	0.486316	0.964166	0.622154
POLR2D	0.825599	0.486177	0.917358	0.605303
DMBX1	1.1301	0.485718	0.916875	1.07323
CYP2A7	0.950272	0.485682	1.17862	1.0009
PSMD14	1.07392	0.485535	0.976283	1.3346
TMCO4	1.11844	0.485298	1.24004	1.26054
RAB13	0.926098	0.485242	1.04944	1.02438
C2orf49	0.993115	0.485071	0.884288	1.07209
ATXN7L2	1.0215	0.484993	1.20322	1.10929
SLC39A8	1.22595	0.484863	1.04819	1.1518
RSAD2	1.10766	0.484861	1.03331	1.02494
BCL11B	1.00455	0.48465	0.933749	0.874199
BSND	1.05012	0.484624	1.16273	1.09472
ZNF239	1.16454	0.484506	1.16966	1.21217
ERBB2	1.01528	0.484505	0.883655	0.955794
TGDS	0.959012	0.483831	0.91208	0.906319
LAMTOR5	0.933717	0.483454	0.68212	0.366218
GCN1	1.33874	0.483354	1.0814	0.908755
NUCKS1	0.856048	0.483289	0.961207	0.920434
TCAIM	1.07121	0.483286	1.12161	1.14619
GABRQ	1.05451	0.483212	1.20591	1.12388
CD79A	0.990231	0.482624	1.05781	1.13528
PROSER3	1.07468	0.482366	0.885074	1.1772
MIEN1	0.819425	0.481895	0.956656	0.81259
ADH1A	1.01365	0.481774	0.987414	0.960273
KRTAP4-12	1.26541	0.481652	1.23084	1.12056
LBX2	0.967732	0.481246	0.982469	1.1105
UBXN11	0.962319	0.481137	0.894487	0.756915
CAMSAP2	1.22932	0.480906	0.997719	0.970089
CPA6	0.916796	0.480641	0.950546	0.958454
TINAGL1	1.024	0.48051	1.05673	0.971845
ARID3B	0.958533	0.480333	1.05153	0.951255
ST3GAL6	0.888304	0.480183	1.12219	1.02247
CCDC142	0.925442	0.480072	0.986433	1.18378
OR2AT4	1.2238	0.479833	1.08406	1.00042
UGT8	1.0564	0.47981	0.952704	0.88981
CAPNS1	1.14396	0.479774	1.1076	0.884105
ATP5MC1	0.815166	0.479515	0.854257	0.624077
NECTIN2	1.10183	0.479328	1.07447	0.913169
PHIP	1.06347	0.478962	0.818104	0.776843
TTLL2	1.07729	0.478774	1.00625	1.0881
MED16	0.907321	0.478514	0.59626	0.436812
COL8A1	1.18072	0.477934	0.933786	0.821536
SLC25A10	0.919024	0.477873	1.07493	0.86585
OR56B1	1.01126	0.477709	1.09105	1.00808
TSSK1B	0.940056	0.477706	0.965257	1.13095
CSNK2A3	0.919604	0.477327	1.1023	1.02512
CLPTM1L	1.09609	0.477311	1.1238	1.2848
LACTBL1	0.820226	0.477006	0.843874	0.65354
ZNF155	1.09798	0.476949	1.02874	0.911347
CAMSAP1	1.06375	0.476702	1.1247	1.09362
ANKRD50	1.02651	0.476589	0.942451	1.04658
H2BW1	1.16934	0.476066	1.32106	1.24737
KLK8	1.08671	0.475997	1.13334	1.23005
KDM3A	1.19556	0.475618	0.910543	0.83637
ELOVL6	1.0599	0.475514	1.04609	0.882368
SSR1	1.20834	0.475436	1.02539	0.96226
TBC1D19	1.10704	0.475362	1.10762	1.09071
SLC22A12	1.01198	0.475065	1.08949	1.07068
PRRT1	0.980849	0.474942	1.2801	1.05683
ZNF581	1.16047	0.474898	0.872594	0.890999
HLA-F	0.850064	0.474863	0.911026	0.897826
ZBTB32	0.951853	0.474831	1.09167	0.93107
USF1	1.10925	0.474298	1.09946	1.07476
FGF4	1.03658	0.474156	1.08469	1.09192
POMT2	1.09616	0.473507	1.1978	0.940568
C19orf47	1.12509	0.473077	0.975735	1.34818
POLR3G	1.19052	0.472897	0.912335	0.972389
CLCNKB	1.04059	0.47263	1.09831	1.25011
SLC6A9	0.984351	0.472527	0.800455	0.982545
PSMB9	1.05632	0.472084	0.984054	1.07807
TP53I13	0.970045	0.472025	0.97099	0.933061
MANBAL	0.898121	0.471972	0.983156	0.747227
DPH1	1.20246	0.471806	0.848416	0.466019
MAP7D3	1.1321	0.471348	1.01557	1.18229
DISC1	0.940725	0.471282	0.956958	0.944484
C10orf88	1.03363	0.471102	0.980463	1.09599
ZNF254	1.38999	0.470829	1.2226	1.23745
ACAD11	0.906674	0.470166	0.987151	1.02988
ZNF559	1.08262	0.470072	1.10711	1.13037
PPIP5K1	0.849085	0.469669	0.996933	0.995573
PHYH	1.24388	0.469605	1.08398	1.18166
CBX6	0.992387	0.469591	1.01173	0.838701
DIPK2A	1.05758	0.469545	1.23623	1.38568
FCRL3	0.978328	0.469355	1.06598	0.986199
ZFYVE1	1.03796	0.469199	1.02839	1.05923
INSL5	0.922741	0.468919	0.990284	1.0095
TROAP	0.936161	0.468916	0.90075	0.949612
HSPB9	0.933782	0.468743	0.902072	0.772107
HMCN1	0.906938	0.468622	0.931425	1.0132
WFDC6	1.10708	0.468343	0.998216	1.07518
PURG	1.01098	0.468224	1.00857	1.07851
PQBP1	1.26895	0.468087	0.994595	0.975084
ALOX12	1.15854	0.468045	1.18682	1.39464
ZC3H3	0.929094	0.467907	0.785398	0.46031
ZNF281	0.880459	0.467895	0.778228	0.668012
SH2B3	0.921712	0.467696	1.27088	1.18471
PRPF18	0.965952	0.467629	0.91596	0.814705
PYCR2	1.04325	0.467455	1.03826	0.9084
RIPPLY2	1.01763	0.467328	1.01413	1.04734
ZBTB11	0.436103	0.467024	0.371293	0.269976
OLIG2	1.02386	0.466995	1.03566	1.07198
ATP2A3	1.15636	0.46698	1.20215	1.19673
GYS1	1.2332	0.466848	1.31833	1.13309
TYROBP	1.2065	0.466513	1.27695	1.50855
ZBTB25	1.07322	0.466321	0.938929	0.841063
USF3	1.04883	0.465711	0.814082	0.764055
LIN7B	0.96275	0.4656	1.05981	1.15199
BCAM	0.929625	0.465062	0.897709	1.17175
AJAP1	1.17448	0.464823	1.07424	1.12844
CCDC159	1.10443	0.464707	1.03106	0.974238
ZKSCAN8	0.958114	0.464608	1.13274	1.17166
C10orf91	0.996247	0.464589	1.04163	1.00802
GALNT16	0.901289	0.46452	0.974685	1.0345
FAM124B	0.992452	0.464463	0.909776	0.9066
AGO1	0.971517	0.464349	1.02281	1.14117
ARFIP1	0.898305	0.46345	0.851594	0.88243
GPR18	1.05663	0.463263	1.0219	1.01318
SPIB	1.03919	0.463079	1.08371	1.14892
TCHP	0.99558	0.463003	1.02305	1.23527
RAB3C	1.01158	0.462734	0.942106	0.900762
PGBD2	1.0362	0.462428	1.12939	0.946594
FAM43B	0.979312	0.462042	0.963002	1.07788
ELOVL1	1.22886	0.462036	1.11067	0.914628
ZNF260	0.973841	0.462008	0.993163	1.07482
PDX1	0.964994	0.461703	1.03649	1.22065
RELL1	0.897214	0.461511	1.19936	1.09846
KIF17	0.963024	0.461324	1.17719	0.826444
PPP1CC	1.17582	0.460993	1.03773	1.28797
CNKSR1	1.02268	0.460761	1.19849	1.02754
HSF1	1.01174	0.460219	0.763702	0.816229
ZNF345	1.17819	0.460204	1.02108	0.935096
JUN	0.950078	0.459311	0.980534	0.850368
LGALS12	0.93505	0.459307	1.06376	1.00514
C1orf198	0.994036	0.459129	1.0387	0.970738
REN	0.943096	0.459119	0.959636	0.962855
PLEKHG2	1.00737	0.458871	0.940696	1.02357
LGI3	1.02198	0.458736	1.2723	1.14987
DNAJC24	1.13467	0.45858	0.750852	0.584398
BRD2	0.95516	0.457658	0.904222	0.70317
ABCG8	1.10621	0.457644	1.12058	1.16134
GPX1	1.25644	0.45756	1.31651	1.31315
CYP3A4	0.982863	0.457461	0.838111	0.870824
SYNGR4	1.20624	0.45743	1.23628	1.37002
ARL8A	1.0848	0.457351	1.15336	1.04852
SCRT1	0.999115	0.457263	0.969526	0.907725
HERPUD1	1.02059	0.456527	1.23289	0.990616
ZKSCAN2	0.997605	0.456457	0.872534	0.860667
KIF1B	1.01594	0.456012	1.15809	1.2684
DIRAS3	0.820827	0.455905	1.01996	0.964293
TMEM167A	1.01484	0.455857	0.829786	0.587377
YWHAB	1.03409	0.455825	1.03422	0.77444
NR1I2	1.02141	0.455819	0.903964	0.807104
CBLB	1.16092	0.455612	1.08274	1.20802
KIF3B	1.03174	0.455175	1.02382	0.828126
ZBTB42	1.09374	0.455052	1.03398	1.00892
KPNA1	1.16437	0.454828	0.960731	0.961992
ABI2	0.973567	0.454596	0.981079	0.973624
ANKRD40	0.881537	0.45408	0.901977	0.812406
CD96	1.11183	0.453806	1.11777	1.02409
CDK5RAP1	1.14643	0.453745	0.981418	0.931489
REEP1	1.10717	0.453718	0.932819	1.10523
KIAA1210	1.09505	0.453693	1.13495	1.0537
TRUB1	1.10393	0.45369	1.17029	1.1293
LRRC9	1.05695	0.45365	0.987402	0.902183
PXMP4	0.85043	0.453503	0.959671	0.831631
RAVER1	1.13037	0.45346	0.98435	1.07443
C6orf136	1.03735	0.453439	0.902979	0.798037
PARP8	1.05204	0.453388	1.01916	1.03128
POLR2J	0.973619	0.453245	0.982531	0.93335
IFNA5	1.36257	0.453151	1.17092	1.12084
SLC13A2	1.09038	0.453041	1.03287	1.05081
ZNF668	0.993727	0.452992	0.998912	1.05183
ZNF296	1.10534	0.452637	1.23043	1.00344
OR1M1	0.985323	0.452444	1.0226	1.11638
ZNF789	0.990581	0.452316	0.952117	0.822131
KRTAP29-1	0.996103	0.452293	1.08615	0.972509
LGALS14	0.924196	0.452278	1.03312	1.1128
INPP4A	0.889915	0.452194	0.975635	0.926543
FXYD2	0.9457	0.452076	0.898424	1.02122
ABI3BP	1.00575	0.451847	0.861692	1.04236
SLFN14	0.88982	0.451653	0.954499	1.0131
CELA1	0.84061	0.451592	0.760602	0.797659
C1orf159	1.02512	0.451493	1.09643	1.05683
FAM71F1	0.92376	0.451398	0.766957	0.948715
SLC7A4	0.838095	0.451287	0.914792	0.838844
OR5AC2	1.0639	0.450956	1.03315	1.03438
MEIOC	0.813476	0.450725	0.919481	0.651952
CTNNA1	0.860588	0.450658	0.889731	0.990604
ZNF564	1.01196	0.450537	0.967431	1.02914
ZNF783	1.05732	0.450402	0.943113	0.916083
RHO	1.07983	0.450284	1.21223	1.15861
HLX	1.00111	0.450186	0.978295	0.899337
ZNF529	0.982153	0.44991	1.0395	1.12506
CHP1	0.986024	0.449909	0.802308	0.694434
ALG10B	0.999091	0.449883	0.921545	1.03906
TADA1	0.587795	0.449814	0.307992	0.145256
SYTL5	1.12446	0.449749	1.20928	1.25736
LGALS4	0.98201	0.448819	1.00218	0.801778
ZNF614	1.12865	0.448624	0.932219	1.05935
MFSD10	1.0382	0.448518	1.10888	1.09931
TMEM236	1.14288	0.448488	1.01774	1.16863
SDCCAG8	1.05042	0.448161	0.936229	1.00347
PLAAT4	0.95261	0.447527	0.93505	0.990017
MCC	1.06645	0.447502	1.15377	1.17135
PEX14	0.804761	0.447432	0.910611	1.02275
ETFB	1.13643	0.447251	1.09465	1.17327
SCARA5	1.0878	0.447231	1.1444	1.1324
IRGC	0.837303	0.446956	1.24074	1.2118
CXCL12	1.07223	0.446763	1.26061	1.18965
CDNF	1.199	0.446706	1.2575	1.15188
UBE2Q1	1.12188	0.446624	1.06109	1.06882
LMOD2	0.991689	0.446493	0.944535	0.828069
MRM1	0.910882	0.446426	1.14412	1.02053
PLEK2	0.915493	0.446259	0.909133	0.725838
KCNC2	1.11862	0.44624	1.01542	0.967992
CCNT2	1.0484	0.44604	0.976908	0.830604
ADAMTS20	1.03304	0.445773	1.06473	1.05619
IQCE	1.07452	0.445725	1.02077	1.14732
NSUN3	1.01653	0.445694	1.13629	0.768763
ENOX2	1.10596	0.445637	1.09781	1.185
C2CD5	1.03428	0.44514	1.16869	0.990044
EP300	1.04802	0.445006	0.920918	0.811971
CCKAR	1.13071	0.44488	1.08432	1.04495
IL2	0.894204	0.444846	1.07646	0.920304
HADH	0.958714	0.444772	1.02549	0.943885
TRIM24	0.951521	0.444732	1.01259	0.873133
RASSF8	1.04503	0.444563	1.11466	1.15799
ADCY8	1.11411	0.444418	1.10052	1.00223
SYNJ2	1.05672	0.444083	1.05801	1.08815
PAK4	1.19785	0.444073	1.358	1.24609
CYP4A22	0.710154	0.443907	1.18012	1.16172
BCDIN3D	1.08125	0.443354	1.01685	1.0882
ADAMTS2	1.05813	0.443255	0.984525	1.05404
SF3A2	0.668004	0.443152	0.786847	0.50548
FCGBP	0.907621	0.442809	0.951806	0.833603
CDKN2C	1.10494	0.442677	1.16008	1.22858
SURF4	0.905113	0.442612	0.873546	0.798205
ERMN	1.05218	0.442416	1.09862	1.15889
BTBD19	1.19498	0.442002	1.23373	1.29419
CLN6	1.12457	0.44181	1.199	0.999389
AVPR1A	1.18586	0.441546	1.17264	1.24467
FAM117A	0.915246	0.44153	0.968387	0.852111
RAB4B	0.92671	0.441463	0.957142	0.925425
KRTAP19-7	0.96995	0.441392	1.17352	1.30208
DLG4	1.21572	0.441367	0.964298	0.959349
ERG28	1.01216	0.441209	0.903788	0.739415
HSBP1L1	1.26374	0.440975	1.21781	1.10854
ANKRD34A	1.29616	0.44066	1.24051	1.13057
CEP89	1.16637	0.440425	1.10564	1.22006
PLEKHF1	1.24712	0.440184	1.0789	1.05094
OR10H4	0.925877	0.439742	0.951305	0.830284
CRYBA4	1.00212	0.439299	0.988787	0.94745
TIA1	1.24348	0.439184	0.996954	1.07771
NBPF6	1.13616	0.438768	1.02331	1.13442
BHMT2	1.01187	0.438734	1.00047	1.0708
FTL	1.04662	0.438515	0.964509	0.797707
IKZF3	0.689569	0.438481	0.789577	0.739696
C16orf92	0.939739	0.438383	0.787253	0.814033
L3MBTL1	1.16469	0.438068	1.12402	0.96295
SLC49A3	0.979188	0.437873	0.993262	0.977683
FAAH	1.39999	0.437767	1.18344	1.2805
HHLA3	1.19532	0.437621	1.10277	1.30344
PTBP1	0.714448	0.437376	0.502205	0.185972
CD68	1.08689	0.437343	0.914145	0.901027
DNAJA1	1.16201	0.437084	0.90208	1.06091
WNT4	0.871832	0.436969	0.902905	0.933382
CFAP206	1.04702	0.436815	1.1785	1.12126
IGFLR1	1.06332	0.436794	1.00988	0.900598
ENPEP	1.1746	0.436771	1.10897	1.12771
TBXT	1.15445	0.436765	1.23526	1.40184
FUNDC2	0.937639	0.43656	1.03825	1.06929
ZNF706	1.08253	0.436331	1.08815	0.978557
UNC45B	1.13055	0.436213	1.02338	1.15196
ZNF436	0.864007	0.436168	0.985089	0.908567
KCNJ14	0.999224	0.435957	1.08869	1.03693
ZNF284	1.10094	0.435908	1.1994	1.08843
TMEM215	1.01361	0.435714	1.20138	1.12147
H2BU1	1.1948	0.435667	0.850791	0.917206
ELK3	1.13303	0.43563	1.19399	1.12404
TMEM268	0.994453	0.435544	1.12176	1.04884
MUTYH	1.04818	0.435477	1.19381	1.33398
ZFP82	0.977784	0.435288	1.14489	1.28922
ZNF226	1.06725	0.43526	0.91792	1.18153
ZNF285	1.10713	0.435108	1.16208	1.0119
RPL15	1.04257	0.435098	0.537987	0.174626
CCDC30	1.29345	0.434656	1.20175	1.20986
CDCA8	0.816627	0.434183	1.12371	1.16729
AIDA	0.926781	0.434131	1.01114	0.937684
TATDN3	1.0563	0.433535	0.976488	1.0354
SLITRK3	0.971365	0.433507	1.22492	1.06888
RPS4X	1.35956	0.433345	1.24508	0.793814
ATP8A1	1.15495	0.432343	1.24275	1.34242
AP1AR	1.29381	0.432116	1.08555	0.98526
OR8S1	0.986174	0.432103	1.00192	0.971783
KDM5B	0.983529	0.432084	1.21813	1.03422
PDZD3	1.07627	0.432077	1.01262	1.08968
FOXD2	0.945905	0.431807	0.919802	1.2702
ZNF436-AS1	1.13925	0.431806	0.980783	1.19007
GRIN2C	0.822768	0.431718	0.852637	1.03984
GRAMD1A	1.17711	0.431715	1.23818	1.22209
SLC47A2	1.02999	0.431462	1.02788	0.939799
CCDC160	1.06382	0.431428	1.08239	1.08201
MYH7	0.976708	0.431289	1.14582	1.40151
S100A11	1.00539	0.431125	0.968807	0.886135
LCE3C	1.10988	0.431117	1.11422	1.22344
CFAP47	1.32721	0.4311	1.15897	1.36042
LILRB1	1.13475	0.43099	1.11197	1.16694
ENO3	1.11937	0.430911	1.12013	1.1368
LYRM2	0.895074	0.430881	0.883154	0.794279
ATAD5	0.711188	0.430729	0.804885	0.621753
KHDC1	1.20774	0.430609	1.24965	1.32611
E2F3	0.986866	0.430504	0.988916	1.16678
SNRNP40	1.01478	0.430026	0.834515	0.563105
LAMB3	1.0941	0.429993	0.97538	1.07206
RGS6	1.20681	0.429929	1.128	1.16811
AGBL4	1.21647	0.429911	1.08327	1.25994
TMEM14B	1.1207	0.42978	0.930654	1.06406
HTR4	1.06461	0.42943	1.00128	1.04571
SMIM13	1.0038	0.429395	0.808271	0.916286
GOT1	1.0779	0.429388	1.04721	0.962932
TM9SF3	1.09938	0.42891	1.00298	1.18024
IER3	1.18431	0.428787	1.08412	1.14812
NTRK1	1.19759	0.428697	1.15701	1.26243
ZNF613	1.12519	0.428628	1.13598	1.32203
DLG1	1.19411	0.428585	1.16601	1.43411
EIF3L	0.997279	0.428392	0.953243	0.952255
SLC25A29	0.938293	0.428391	1.06305	1.24682
GALT	1.03228	0.428274	0.912608	1.00216
ZDHHC15	1.28258	0.428245	1.3063	1.5115
PIK3CA	0.950873	0.427851	0.999571	0.968018
MCTP1	0.856979	0.427792	0.853876	0.803878
KCNRG	1.13981	0.427717	0.949204	1.13233
SIPA1L3	1.02664	0.427659	0.96039	0.870649
BCOR	1.33556	0.427242	1.09961	1.1419
ZNF676	1.18737	0.426888	1.20274	1.17121
MELK	0.990973	0.426863	0.979661	0.92814
WDR62	0.963545	0.426715	1.06288	1.05064
HEG1	0.929479	0.426616	1.11618	1.13461
PIK3R3	1.02042	0.426566	1.12132	1.0466
SPCS2	0.568747	0.426477	0.554096	0.514516
CHRNA2	1.00164	0.426471	1.01442	1.17708
PSMD1	0.909346	0.426185	0.771309	0.787833
ZMYND8	0.896623	0.426173	0.9408	0.908535
LBR	1.168	0.425961	1.01242	1.06206
SPATA8	0.931007	0.425763	0.980255	0.922254
LAMTOR2	0.918584	0.425753	0.915931	0.605335
HSPB6	1.01771	0.425702	1.11737	0.975973
VSTM4	1.13189	0.42568	1.42213	1.4357
UGP2	0.961421	0.425591	0.813555	0.673998
A3GALT2	0.874079	0.425452	0.87339	0.769968
SLC39A2	1.02278	0.425411	0.971935	1.01892
DYDC2	1.12259	0.425375	1.11421	1.19989
TRIM69	0.939345	0.425226	0.988595	1.06418
FCMR	1.05341	0.425155	1.06334	0.813275
HOXD10	1.1414	0.424994	0.988574	1.14188
CSRNP2	1.05024	0.424617	0.937969	1.06529
SYNDIG1L	0.970962	0.424607	0.972282	0.891013
LHCGR	1.05215	0.424571	1.03806	1.20691
SLC16A11	1.08241	0.42449	1.27103	1.07636
TTC39C	1.05806	0.424462	0.882702	1.05014
ZNF76	1.13157	0.423827	1.08939	0.945982
GPX2	0.939352	0.423567	1.01298	1.13404
C19orf81	1.14514	0.423438	1.08255	1.1542
CCM2L	1.04191	0.423373	1.17724	0.905103
FXYD3	1.15004	0.423079	1.03879	1.31514
FNDC1	1.06906	0.423057	1.1452	1.14617
PPP1R15A	1.10511	0.423007	1.03907	1.2025
TTC39A	1.20074	0.422796	1.04189	1.17964
CMTR2	1.10768	0.422741	0.902047	0.557767
LPA	1.09359	0.422638	1.02443	1.16802
NICN1	1.21907	0.42216	1.22168	1.56482
TCF3	1.17416	0.422002	0.896429	1.09905
MYBPC1	0.854268	0.421996	0.83825	0.957894
ERC2	1.02807	0.421995	1.0737	1.08047
ANKEF1	1.10041	0.421877	1.2452	1.21587
BASP1	1.05541	0.421817	1.05974	1.13524
MESP2	1.00328	0.421435	0.958063	0.851415
USP12	0.820821	0.421367	0.918039	1.04595
PRDM5	1.13989	0.421273	1.10977	0.992022
OR6K3	0.964237	0.42126	1.13545	1.09753
COX4I2	1.00148	0.421158	1.0923	0.946857
MPHOSPH9	1.32717	0.421141	1.13191	1.30355
NCK2	1.16219	0.421119	1.05146	1.10818
SLFNL1	0.875611	0.420956	0.784255	0.82559
LPCAT4	1.10028	0.42084	1.18258	1.32327
FAM120B	1.16177	0.420531	1.31153	1.29946
TBC1D1	1.10232	0.420446	1.19137	1.2293
FAM182B	1.06492	0.420399	1.09139	1.09988
SCCPDH	0.945471	0.420266	0.985759	0.983102
NBPF3	1.13707	0.420112	1.10402	1.19137
SERPINA5	1.01385	0.419902	1.15026	1.1411
SNX1	0.975664	0.419893	1.1502	1.15735
IL22	1.19556	0.419869	1.03332	1.12543
CFHR5	1.08793	0.419811	1.09057	1.36671
AQP6	1.16894	0.419779	1.00941	0.992621
ANXA11	0.993824	0.41968	1.09156	1.01714
LIMS2	0.896959	0.419603	0.949316	0.903829
PRMT7	1.05245	0.419521	1.0831	1.07711
OBSCN-AS1	0.946269	0.419278	0.953156	0.976055
CBX8	0.854571	0.418832	1.0553	0.955943
ARMH1	0.921917	0.418768	0.943044	1.0407
TREML2	0.874923	0.418739	0.889989	0.843711
CD40	1.04106	0.418532	0.970929	1.04311
DLEU7	0.957083	0.418526	0.878495	0.884203
MAP6D1	1.08401	0.418476	1.0209	0.973995
OR4K17	1.35194	0.418414	1.20118	1.32955
CLDND1	1.14155	0.418027	0.908536	0.934379
TSC2	0.750084	0.41796	0.514531	0.30955
LTA4H	1.11902	0.417757	1.23029	1.17219
CEACAM18	1.08554	0.417663	1.08326	1.24368
RBMS2	1.06729	0.417598	0.961374	1.00921
CCDC97	1.09015	0.417404	1.21016	1.08269
IL17RD	1.26455	0.417331	1.05132	1.20293
CCDC85B	0.975361	0.417282	1.03517	1.04801
RGS4	0.994495	0.417254	1.01829	0.923681
APPBP2	1.02282	0.417224	1.13451	1.05647
SPATS2	1.12804	0.417174	1.00882	0.959044
KLF16	1.0977	0.417156	0.981697	0.729841
LEFTY1	1.03033	0.416964	0.958206	1.13629
ADAMTS14	0.954074	0.416914	0.900431	1.05529
SRSF7	0.697206	0.416887	0.612242	0.63112
LSMEM1	0.948742	0.416854	0.821862	0.716188
TDP1	1.05805	0.416841	0.873111	0.861263
SYCN	1.00415	0.416694	0.968124	1.10438
CALM1	1.1277	0.416514	1.06363	1.15242
TRIM45	1.05675	0.416106	1.15699	1.1608
GLTP	0.824067	0.41606	0.780493	0.822523
ALKBH5	0.949149	0.415658	1.0364	0.933041
ZMYM1	1.07299	0.415562	1.02048	1.19075
MAP9	1.11566	0.41552	1.10297	1.10879
PLA2G2D	1.07305	0.415457	0.962051	1.11909
GPR3	0.953059	0.415332	1.17106	0.857437
LBP	1.05422	0.415165	0.980878	0.796864
KCTD14	1.06587	0.414851	1.01439	1.11186
PAPLN	1.00672	0.414748	1.07335	1.1906
ZFHX2	1.10474	0.414293	1.15234	1.29056
PRB3	1.1877	0.414102	0.900664	1.1046
ZFP30	0.982079	0.414057	0.931325	1.11952
CUTC	1.12214	0.413841	1.1384	1.13027
MID1	0.995985	0.413775	0.999397	1.17416
MFSD5	1.01369	0.413727	0.983262	1.06119
SHE	1.29862	0.41362	1.03164	0.921485
ZDHHC8	0.926984	0.413568	0.885252	0.806966
FRK	1.17377	0.413556	1.03624	0.996395
HSPA13	0.984325	0.41276	0.854003	1.02702
P2RY1	0.955851	0.412555	0.953056	1.045
AAMDC	1.1245	0.412399	0.919578	0.914678
PRDX1	1.25749	0.412389	1.12438	1.10717
H2AC20	0.917843	0.411985	0.964485	0.801977
CEACAM1	1.00265	0.411844	0.95297	0.97283
SLC6A11	1.07832	0.411549	1.15343	1.19354
AKT1S1	1.12418	0.411544	0.990131	1.04161
CADM4	1.09627	0.411533	1.1017	1.05096
HSPH1	0.885701	0.411355	0.9024	0.86336
CATSPER3	0.930331	0.411338	1.0316	0.992625
DEFB112	1.05369	0.411221	0.974207	0.976956
FTH1	0.645664	0.410888	0.943029	1.0481
PCNX2	1.07422	0.41081	1.10914	1.13679
LILRB1-AS1	1.10458	0.410764	1.19365	1.2641
ISL1	0.840254	0.410723	0.795548	0.593531
NGB	1.03936	0.410721	1.10112	1.16292
TMEM256	1.15598	0.41052	1.2941	1.20997
C1orf105	1.08233	0.41049	1.10898	1.16564
KRTDAP	1.03323	0.410478	1.06764	1.08682
CREBRF	0.975795	0.410418	1.05492	0.762452
HEATR4	0.97455	0.410402	0.922192	0.952955
RS1	1.13349	0.410154	1.01152	0.944906
F2RL2	1.0891	0.41001	1.12414	1.12171
PDE5A	1.16668	0.40994	0.977335	1.16095
ZNF624	1.08477	0.409904	0.951702	0.950399
UBE2V1	0.919189	0.409894	0.986435	0.924251
PSIP1	1.14572	0.409749	1.07759	1.06079
HIKESHI	0.900401	0.409655	0.897769	0.529494
C3orf52	0.988385	0.409645	1.08209	1.06998
STOML2	1.07333	0.409481	1.04255	0.79381
TAS2R13	0.981653	0.409441	1.00084	0.803761
CCDC155	1.04442	0.409346	1.08602	0.970159
PCSK9	1.22343	0.409227	0.912394	0.841752
PPP1R13L	1.07884	0.409077	1.08392	1.1195
ZNF280C	1.06296	0.409008	0.98009	1.06444
METTL7B	1.06517	0.408817	1.05144	0.962433
RP2	1.1417	0.408759	1.10044	1.11837
PSEN2	1.01746	0.408754	1.03932	0.8934
NR1I3	1.21668	0.408717	1.14655	1.20684
INSRR	0.939824	0.408677	1.20284	1.28089
CHD7	0.982958	0.40836	0.972784	1.10994
SMYD3	0.990167	0.408142	0.957836	0.894554
PA2G4	1.07086	0.408137	0.894599	0.660528
ERBIN	1.01065	0.408001	0.853189	1.02946
MSR1	0.997651	0.40774	1.04472	0.879176
SPHK2	1.00406	0.407667	1.07546	1.12359
RAB42	0.889388	0.407531	1.02337	0.798974
FABP5	1.64161	0.407518	1.85017	1.59369
MAP3K8	1.09225	0.407431	1.11538	0.982449
ASB5	1.03496	0.407345	1.0622	0.979277
KLHL33	0.999779	0.407196	1.06373	0.993377
C1orf109	0.724634	0.407162	0.580722	0.354389
SAT2	1.10504	0.40711	1.15076	1.08781
ACTN1	1.07204	0.407028	1.01365	1.14046
ZNF430	0.961367	0.406767	0.84645	0.925117
CHML	1.03485	0.406698	1.01523	0.832624
PCNP	1.20985	0.406697	0.893519	0.695865
BDH2	1.04584	0.406485	0.952444	1.01974
POC1B	1.19651	0.406171	1.01136	1.19758
ATL2	1.01059	0.406146	0.608524	0.247228
CEACAM21	1.07134	0.406116	1.09399	1.00167
PCARE	1.02548	0.405834	1.13565	1.10714
PEF1	0.938469	0.405805	0.882244	0.803764
CFAP73	1.08518	0.405804	1.1151	1.04601
SRARP	0.994745	0.405525	0.994582	1.1031
ZBTB1	0.986304	0.405414	0.666579	0.724326
TEX12	1.06352	0.405298	0.976101	1.08695
PLA2G4C	1.09034	0.405169	0.951988	1.02047
PSG11	0.961957	0.405168	1.06012	1.05214
HIBADH	1.17441	0.405157	1.09598	0.922092
SGO2	1.01787	0.405009	1.03751	0.918009
SLC22A9	1.0786	0.404615	1.02379	1.16789
LXN	1.03775	0.404577	1.01739	1.30838
AREL1	0.877076	0.404567	0.85573	0.921816
GPR37L1	1.09783	0.404552	1.05401	1.04454
ZNF365	1.14588	0.404437	1.18438	1.25613
ABHD13	0.954964	0.404434	1.18028	1.11998
TSSC4	1.13582	0.404045	0.889127	0.799078
PEBP1	1.00326	0.40402	1.08518	1.16955
PAIP2	0.968722	0.403845	1.16789	0.845681
FAM50B	1.14022	0.403844	1.27885	1.13607
ATP4A	1.00383	0.403591	0.8738	0.955034
FKRP	1.19018	0.403567	1.27072	1.43186
ZYG11A	1.05124	0.403521	1.05023	1.08035
PPM1M	1.0096	0.403479	1.14283	1.05615
FEZF1	0.852679	0.403477	1.01277	0.9244
CCL1	1.06953	0.403336	1.08381	0.938143
EYA3	1.01293	0.403303	0.955901	0.885961
HSBP1	0.972766	0.403287	0.967169	0.967277
DZIP1	1.10242	0.403208	1.1685	1.42062
TRAF3IP2	1.08325	0.403075	1.12987	1.10709
RFC4	0.622457	0.40298	0.701552	0.666107
C1GALT1C1	1.11644	0.402835	1.25727	1.40452
PFKP	1.33137	0.402769	1.14177	1.0959
KRT25	0.86111	0.402763	1.0878	0.899287
TSTD2	1.13168	0.402548	1.01917	1.08137
ASIP	0.8391	0.402463	0.785619	0.778519
AHCYL1	1.1782	0.402237	0.925758	0.794937
FICD	1.18851	0.402139	1.0376	1.18439
COL4A5	0.880571	0.402056	1.09338	1.03823
KLF8	1.07813	0.401967	1.08393	1.25001
SORCS2	1.13659	0.401957	1.01268	1.06132
MYLK2	1.02948	0.401937	1.09688	1.09452
NDEL1	0.985747	0.401762	0.976437	0.780829
RPS6KL1	1.16807	0.401548	1.03012	1.02048
ANK2	1.13136	0.401531	1.05228	1.05491
PSMD10	1.18543	0.40143	1.10512	0.862747
ADH5	0.999315	0.401344	1.1173	1.14825
CRHR2	1.06005	0.401298	0.940834	0.984376
THBS4	1.03325	0.401259	0.949136	1.14159
NIF3L1	1.03948	0.401183	0.893715	0.981991
SPATA24	0.931371	0.400936	1.03211	0.906618
IQGAP2	1.06291	0.400689	1.14275	1.36014
FEZF2	1.03328	0.400475	1.10609	1.09074
PITHD1	1.04776	0.400322	1.07831	1.06485
ZNF683	1.00268	0.400244	0.878148	0.968229
SEPTIN3	0.934747	0.400212	0.79512	1.02141
CEP192	0.927464	0.400174	0.928136	0.782115
MFSD9	0.958083	0.400114	0.936896	0.942725
BCKDHA	1.06148	0.400019	1.19405	1.02526
ACADVL	0.87992	0.399937	0.856648	0.903595
TRIQK	0.949891	0.399929	1.06014	1.2024
OR8K5	1.11681	0.399836	1.08048	0.911622
LY6G6D	1.11887	0.399737	1.02059	1.07246
DUSP15	1.17721	0.399501	1.0147	1.02029
TRABD2B	1.05521	0.399319	1.07921	0.992362
C20orf141	1.16632	0.399244	1.18308	1.30148
FRMD4A	1.10322	0.399007	1.07061	0.878829
CNOT10	1.06113	0.398955	0.915421	1.05372
ALDH3B2	0.804871	0.39857	0.838782	0.958975
LPCAT2	0.954767	0.398282	1.02265	1.02952
ZNF441	0.923835	0.398246	0.923919	0.838242
GAD2	1.16279	0.398191	1.05164	1.09959
TLCD3A	1.07529	0.398144	1.1939	1.19917
OLFM3	1.18695	0.398054	1.32252	1.35899
MLLT6	0.824849	0.398042	0.950299	1.01217
RAD23B	0.973712	0.39802	0.819443	0.667734
DYSF	0.996335	0.397981	0.968965	1.07879
SLC26A9	0.988787	0.39793	1.01118	0.93494
SMURF2	1.08136	0.397858	1.08825	1.09769
DEFB128	1.01813	0.397691	1.26659	1.11519
MICA	0.996919	0.397576	1.05066	1.16581
C2orf72	1.13547	0.397277	1.05496	1.08874
PKN3	1.0788	0.397238	1.08756	0.984197
MYH10	0.886299	0.397205	0.958038	0.920274
HIGD1A	1.13772	0.396909	1.08453	0.953847
GPATCH8	0.837879	0.39688	0.756278	0.781847
ARHGAP12	0.97768	0.396764	1.03658	1.10749
ZNF181	1.09192	0.396722	1.16821	1.12984
CYBC1	1.12407	0.396656	0.902982	0.856451
ANXA5	1.11749	0.39657	1.17685	1.06311
B3GNT5	1.04949	0.396512	1.13577	1.1923
ZC3H11A	0.961962	0.396459	0.934815	0.705127
TOPAZ1	1.06428	0.396362	1.08861	1.3383
ADAM9	0.990432	0.396317	0.992103	0.915648
ATXN2L	1.21618	0.396296	1.00849	0.935702
RTN4IP1	0.504113	0.396123	0.440236	0.327106
SLC7A3	1.13447	0.396065	1.03241	1.11163
ARHGEF37	1.06627	0.39591	1.09659	0.983733
PDCD2	0.968412	0.395767	0.758685	0.53624
IKBKE	1.26147	0.395749	1.10071	1.19098
SLC6A15	0.864183	0.395602	0.969317	0.91942
GCAT	1.10244	0.395413	0.849921	0.950561
TSC22D3	1.29646	0.395136	1.20201	1.28151
SCX	0.90936	0.395097	1.02815	1.16118
CPT1B	1.16022	0.394993	1.1879	1.09509
MBD1	0.892698	0.394691	1.04566	1.24758
OPA3	1.30685	0.394502	1.06078	1.16605
BPIFB1	0.952592	0.394395	0.990495	0.972525
NUP210L	1.07502	0.394156	1.11938	0.974714
ALDH6A1	1.09802	0.393831	1.05571	0.841114
TCL1A	1.22491	0.393828	1.17146	0.909718
GLT8D2	1.10951	0.393826	0.869454	0.98429
PROCR	0.965035	0.393774	0.93508	0.88573
MME	0.955834	0.393408	0.99022	0.884763
SIRT3	0.925834	0.393356	0.938312	0.858157
PEX12	1.07546	0.393059	1.24202	1.20148
HM13	1.08641	0.393046	1.06223	0.938208
BIRC7	0.868328	0.392844	0.863091	0.758841
USP24	1.04485	0.392678	0.937167	1.06499
KRTAP22-1	1.04743	0.392657	1.0929	1.0787
SREK1	0.969575	0.392493	1.09858	0.888312
COX6B2	0.97713	0.392204	0.949419	1.06368
TCAP	0.921511	0.392152	1.01096	0.984717
NPFFR1	0.99458	0.392107	1.03981	0.968448
FNDC7	0.956899	0.392057	1.10315	1.19419
PARP14	1.11227	0.39202	1.2166	0.92882
FAM180A	1.0695	0.391936	1.10994	1.02831
AP2A1	1.29259	0.391811	1.13881	1.25793
ZNF600	1.12938	0.391666	1.15076	1.08364
PGLYRP3	1.11565	0.391562	1.2388	0.830194
MAGEE2	1.13869	0.391541	0.991544	1.03672
CERS2	1.12277	0.391475	1.05223	1.08525
ACADSB	1.18713	0.39141	1.06195	1.0423
ULBP2	1.10859	0.391404	1.34992	1.25459
CYSLTR2	1.02211	0.391328	1.19465	1.41787
INTS12	1.07839	0.391262	0.995307	0.822462
FRMD4B	1.10457	0.391252	0.932274	0.925733
CCDC24	1.10759	0.391195	1.15371	1.20896
C4orf17	1.1497	0.39111	1.12578	1.20398
PTPRM	1.07875	0.391026	1.04715	1.11292
ST3GAL1	1.08537	0.390985	0.991032	1.01897
RAPSN	1.11829	0.390522	1.03136	1.31504
PYHIN1	1.03252	0.390417	1.01104	1.23094
LOX	1.22222	0.39037	1.10053	1.22262
GPSM1	1.17208	0.390283	0.927296	0.953677
DACH1	1.20258	0.390277	1.04449	0.90833
HMG20A	1.22298	0.390191	0.9939	1.04013
PAF1	1.04811	0.390158	0.980043	1.07647
KIAA0408	0.998859	0.390094	0.937107	0.971619
SCN8A	1.17249	0.390023	1.18333	1.39659
ZDHHC3	0.968471	0.38997	1.01594	1.1656
CPB1	0.932404	0.389834	1.07834	1.19442
NCOA7	1.17466	0.389716	1.09041	1.11351
TICAM1	1.00418	0.389715	1.06119	0.932538
CEBPG	0.969807	0.389695	1.097	0.880569
VPS72	0.961937	0.389625	0.660217	0.509337
GON7	0.84141	0.389566	0.991627	0.897274
DHX36	1.02348	0.389508	0.804842	0.536602
ARFGAP1	1.14628	0.389463	0.893519	1.00192
OR4E2	0.901933	0.389385	0.927325	1.03878
ARHGAP26	1.10521	0.389382	0.984514	1.12303
TNKS1BP1	0.988658	0.389334	1.0518	1.03185
AICDA	0.974493	0.389278	1.15685	1.30413
GCNT3	1.01104	0.389247	1.06873	1.10795
ORMDL3	0.879461	0.389201	0.800333	0.671907
KIF7	0.850015	0.389143	0.857926	0.900677
ATXN7	0.939395	0.389054	0.91542	0.851076
CEP70	0.979572	0.389022	0.960882	0.814769
CHRNB2	1.09473	0.388976	1.08964	1.0852
RETREG3	0.876129	0.388961	0.983511	0.927226
NR0B2	0.978214	0.38896	1.14609	0.880444
OTOR	1.01435	0.388946	1.11796	1.19348
FADD	1.02661	0.388827	1.21221	1.20934
EREG	0.963758	0.388825	0.964168	0.825072
NAA11	1.00959	0.38881	1.02872	0.942659
ATF6	0.995896	0.388807	0.971014	1.00568
GMFG	1.11522	0.388726	1.22593	1.19225
ETNK2	1.03633	0.388644	1.03121	0.926404
HIVEP3	1.20114	0.388555	1.19515	1.26316
ABCC4	1.08473	0.388277	1.18222	1.38052
ZNF546	1.03786	0.388226	0.982362	1.16721
BAALC-AS2	0.94409	0.388094	1.06827	1.09623
PCNX1	1.08412	0.388089	1.14475	1.07328
PRSS53	0.954742	0.387952	1.20821	0.815877
KIR3DL2	0.909488	0.387871	0.93984	1.01004
PPP4R3A	1.2961	0.387869	1.04256	0.903082
LIME1	0.950009	0.387732	0.960753	0.787182
TPTE2	0.935271	0.387564	1.16566	1.05386
ZNF398	0.89788	0.387477	0.994848	0.880652
SKA2	0.877156	0.387456	0.866838	0.800182
ERLIN1	1.11025	0.387351	1.3068	1.2137
ERICH6	1.05289	0.387286	1.05565	0.964282
PRDM1	1.09026	0.387229	0.996687	1.24202
PRDM11	1.07398	0.387009	1.17107	1.08103
TGFB3	1.18658	0.386951	0.941068	1.17193
KLK12	1.14502	0.386924	1.00044	1.08113
TSPAN19	1.09396	0.386741	1.09385	1.19732
H2AZ1	1.09939	0.386711	0.773353	0.599592
DYNLL2	0.912628	0.386571	0.972514	0.765767
SYT1	0.951657	0.386549	0.977391	1.24275
RALBP1	1.17115	0.386475	0.923968	1.05228
SNCB	1.00369	0.386348	1.10979	1.08627
HAUS3	0.452868	0.386239	0.491311	0.411905
SH3PXD2A	1.02087	0.386235	1.14069	1.21027
PADI3	0.993911	0.386226	1.16386	1.01631
RBIS	1.2025	0.386223	0.834883	0.789976
SLC47A1	0.996943	0.386191	0.977612	0.988072
TDGF1	0.959513	0.385854	1.05983	1.0948
C1orf53	0.98255	0.385674	0.952391	1.20959
MTHFD1L	0.913049	0.385576	1.1342	1.13579
ZNF536	1.26158	0.385418	1.1522	0.846363
ZNF438	1.00174	0.385417	1.01063	0.93231
FMNL1	1.07339	0.385133	1.20134	1.0383
DNAJB8	1.04015	0.38505	1.0696	0.91606
KRTAP10-8	1.06688	0.384702	1.14997	1.12142
OR10C1	1.05563	0.384653	0.983236	0.915394
CEACAM19	0.895084	0.384364	0.972448	1.03756
GCNT4	1.09631	0.384218	0.987327	0.983705
NMRAL1	1.07362	0.384044	1.0567	1.22717
NAALADL1	0.986723	0.384026	1.00627	0.995454
RASAL1	1.20282	0.383973	1.11425	1.20267
EDDM3B	0.919214	0.383634	1.08642	1.13853
RHBDL1	0.934123	0.383532	0.981842	0.828472
ARPC5L	1.16795	0.383522	1.15215	1.05317
RPS6KA5	0.960305	0.383511	1.00903	0.798418
SLC38A4	0.982125	0.38342	1.12675	1.12286
ABI3	0.85991	0.383107	1.0347	0.903167
FUCA2	0.951069	0.38308	0.988762	1.17618
BCAS4	0.926523	0.38303	0.850648	0.929004
URGCP	1.04501	0.382914	0.968521	0.948233
TMEM220	1.21242	0.382854	1.13562	1.30366
XYLT2	0.904792	0.382847	0.913569	0.834556
HDAC1	0.914546	0.382574	0.974211	1.05824
KRT12	0.945846	0.382518	1.0315	1.06138
SELPLG	1.25068	0.382498	1.12727	1.27328
TMEM35B	1.05586	0.382406	1.06821	1.31887
INAVA	0.914279	0.382315	0.779538	0.753255
DKK2	1.05917	0.382305	0.987749	0.872544
LMNA	1.00654	0.382265	1.13472	1.19001
NCMAP	0.938968	0.382231	1.11407	1.12738
BEST1	0.953804	0.382181	1.0857	0.879603
CENPT	0.820856	0.382152	0.953334	0.70473
RUSC2	1.29695	0.382069	1.25506	1.1624
FGR	1.12666	0.382032	0.835652	1.01206
HEATR6	0.953478	0.381995	1.09209	0.926804
ESAM	1.02292	0.381869	1.21356	1.23597
SHC4	1.01105	0.381827	1.06386	1.18919
ZNF22	0.903621	0.381721	0.971034	1.0008
FAM219A	1.14188	0.381627	1.08942	0.940954
KDM5A	1.06394	0.381597	0.970547	0.930703
IQCJ	1.03904	0.381567	0.929488	0.797678
ARMC2	1.10766	0.381534	0.987869	0.82508
MAST2	1.04631	0.381525	1.08709	0.946294
TCN1	0.925064	0.381459	1.06752	0.998267
METAP1	1.00228	0.381286	0.788166	0.592187
REL	0.998214	0.381099	1.0987	1.15365
TLX1NB	1.12354	0.381076	0.856397	1.03081
PIK3R5	1.14707	0.381076	1.06092	0.955559
DDX50	1.02848	0.380997	1.14305	0.932266
ETNPPL	1.24723	0.380932	1.09769	1.29559
KLHL10	0.875346	0.380913	0.947095	0.804402
SHISA5	1.15344	0.380849	1.16684	1.2605
TMEFF2	1.00278	0.380675	0.993629	1.07825
ARHGEF15	1.21293	0.380618	1.1965	1.02095
BARHL1	1.09717	0.380521	1.18711	1.03817
PDIA2	0.968007	0.380499	1.1133	1.0166
GOLGA7B	0.999424	0.380288	1.04835	1.34042
TCEA2	0.951961	0.380213	1.09098	1.01554
SEC24D	1.0871	0.380182	0.921933	1.02494
GRHL3	1.0207	0.380104	0.971701	0.788244
ANKIB1	0.861538	0.380033	1.02029	1.11657
C15orf40	1.16735	0.38	1.18263	1.18623
ZNF300	0.91569	0.379901	1.01258	0.808267
VPS37C	1.14607	0.379852	1.18012	1.23157
XKR7	1.19739	0.379847	0.965311	0.918437
PPFIA3	0.949798	0.379674	1.28663	1.43947
SLC16A7	1.026	0.379461	1.01722	1.20941
HOPX	1.0921	0.379457	1.13759	0.947414
PPCS	1.04882	0.379452	0.915041	0.931396
FRG1	1.26798	0.379429	1.34778	1.35328
PIGS	1.03514	0.379406	0.92673	0.861539
SMPD4	1.04738	0.379177	0.986876	1.05088
TBCCD1	1.09956	0.379137	0.895469	0.901859
TCF7	1.31768	0.378989	1.29774	1.20109
TMEM216	1.05931	0.378983	1.03547	1.0875
ESRRB	1.10693	0.378879	0.939414	1.08644
KCNN4	1.195	0.378867	1.05106	1.06625
WNT10B	1.03696	0.378661	1.08562	0.981683
PRR12	1.33109	0.378527	1.05859	0.933624
ANKRD65	1.00084	0.378472	1.02429	1.17503
FYN	1.19791	0.378393	1.06127	1.04606
ANKRD61	1.04385	0.378318	1.00723	1.14799
M6PR	1.04204	0.378186	1.0217	1.1459
PDE6D	1.10371	0.378172	1.28753	1.27945
CALR	0.920266	0.378095	0.909085	0.980918
TMCO2	1.11471	0.378076	1.07565	1.07972
REM1	0.972288	0.377822	0.929337	1.03493
GZMH	0.992666	0.377751	1.04849	1.07346
DIPK2B	1.09351	0.377676	1.01909	1.03929
RHOA	1.1146	0.37764	1.07473	1.1128
PCED1A	1.36731	0.377388	1.1701	1.24175
PLA2G1B	1.09287	0.377193	1.25387	1.23577
THAP8	0.927589	0.376747	1.01831	1.00327
SUN5	0.915099	0.376694	0.870249	0.834168
UQCC1	0.974576	0.376657	0.707852	0.603225
C1orf61	1.1455	0.376622	1.13458	1.01132
MCRIP1	0.961076	0.376569	1.04057	0.780775
IL7	1.05281	0.376467	1.06628	1.08698
ARHGEF10L	1.0143	0.376429	1.05769	1.25125
RASL11A	0.912142	0.376322	0.83667	0.837657
MAP6	1.14743	0.376283	1.23091	1.33225
PDZK1IP1	1.10339	0.376188	1.23522	0.927401
SPINK13	1.21353	0.376177	0.954863	1.19349
TNFRSF18	1.17998	0.376107	1.07024	1.12594
ZCCHC8	0.992627	0.37607	0.936621	1.06883
BCAP31	1.10585	0.375922	1.1588	1.22349
CEP128	1.31442	0.375892	1.12614	1.11887
OCIAD1	0.863981	0.375809	1.03839	0.910691
PUSL1	0.979176	0.37574	0.896977	1.06679
HLA-DQA2	1.00623	0.375701	1.0786	1.05342
HMGN4	1.21148	0.375691	1.13306	1.09443
PRX	1.00049	0.375666	0.995815	1.05248
ALKBH1	1.14656	0.375628	1.06461	0.923288
FBXO27	0.917658	0.375393	0.957126	0.90972
SEC11A	0.906072	0.375326	0.79226	1.15844
RHPN2	1.13164	0.375299	1.02531	0.911325
CDH15	0.878181	0.37523	0.784577	0.904503
PIAS4	1.03913	0.375226	0.918918	0.799274
AK5	1.09157	0.3752	1.12857	1.11619
SIPA1	1.2175	0.375135	1.1443	1.04139
TMEM223	1.24104	0.375021	1.06171	0.9277
PRODH2	0.991492	0.374985	1.02436	1.27302
PTPRCAP	1.0089	0.374963	0.934257	0.965647
SAFB	0.778955	0.374918	0.566205	0.374183
SCN9A	0.930497	0.374837	0.903562	1.06069
RPS20	1.14247	0.374792	0.919246	1.0497
ENTPD1	0.963592	0.374788	1.02621	1.15822
ZNF790	0.961228	0.374768	1.08598	1.03205
PRMT3	1.05347	0.374716	0.973919	0.886265
MCUB	0.967963	0.37448	0.979635	0.906538
UBA5	0.950622	0.374394	0.584147	0.320617
FGF2	1.14314	0.374361	1.10664	1.052
IQCK	1.09269	0.374354	1.08252	1.15109
VAMP8	1.00596	0.374311	0.93445	0.87166
TWF1	1.02946	0.374304	0.886884	0.720678
NT5C3B	0.845806	0.374198	0.967058	0.95357
CD1C	0.899313	0.374196	1.08195	0.967722
AGAP1	1.04968	0.374132	1.08435	1.21349
MBD6	1.00076	0.374067	0.905135	1.03238
HYAL1	1.06625	0.373925	1.03426	1.0806
SERF2	0.968466	0.373915	1.21754	1.19676
ZBED6	0.897714	0.373839	0.910433	0.900583
SOWAHD	1.09821	0.373671	1.29974	1.4278
CLEC7A	0.937241	0.373594	1.0636	0.982801
DCDC2	1.02752	0.373568	0.968666	0.995781
GPR137	1.04562	0.373526	1.09866	1.00398
TCOF1	1.03858	0.373493	0.876715	0.852275
MAGEB18	1.06249	0.373319	0.968013	1.10479
BHLHB9	1.25582	0.373277	1.06464	1.16954
IER2	0.928992	0.373217	1.05438	1.08036
SF3A1	0.831596	0.373073	0.664289	0.609551
UBL7	1.0039	0.373063	1.01289	1.04764
C1orf50	0.976965	0.372971	0.944605	1.1039
CATIP	1.22569	0.37294	1.01948	1.14699
OR13A1	1.05051	0.372863	1.12335	1.35701
CABS1	1.0338	0.372681	1.01039	1.19161
DNAJB13	0.990484	0.372432	0.927661	0.94671
KCNQ4	1.20499	0.372331	1.04687	1.33381
RPP38-DT	1.0734	0.37222	0.961839	1.01119
POU6F1	1.19804	0.372204	1.17154	1.19895
GNB3	1.15772	0.371832	1.13945	1.15149
PROX1	1.09424	0.371706	1.2388	1.40825
PPP1R32	1.11217	0.371693	1.14958	1.17432
MEGF8	0.987795	0.371633	0.90275	1.03762
GVQW1	1.13795	0.371553	1.1896	1.07095
PIGW	0.970372	0.371479	1.08244	1.1738
LHFPL6	1.11401	0.371457	1.20182	1.30552
CRIPAK	1.14341	0.37139	1.23768	1.10526
CDH17	1.06903	0.371328	1.11994	1.11941
HRAS	1.07178	0.3713	0.924001	1.13028
ZNF592	1.11628	0.371266	1.14699	1.06305
ECHDC2	0.994551	0.371146	0.959576	1.10626
IGFL1	0.983433	0.371033	1.08173	1.16026
OTX1	0.917816	0.37098	1.04696	1.09117
MBLAC2	1.10725	0.370915	1.1703	1.11216
ASCL4	1.07973	0.370778	1.11385	1.07038
SLC4A10	1.03132	0.370754	1.08932	1.14632
SMARCA5	0.941891	0.370625	0.888187	0.656933
MT2A	1.0366	0.370562	1.1733	0.967244
HDAC7	1.13686	0.370443	1.04003	1.04235
SFTPD	1.07961	0.370441	1.00425	1.08031
PAPPA2	0.971053	0.37042	1.16583	1.0616
EYS	1.18451	0.370399	0.927356	1.04792
ZNF574	1.06462	0.370346	1.11609	0.920047
CEBPE	1.09274	0.370345	1.02076	0.942458
CLCF1	0.986984	0.370304	1.08509	1.29091
ATP5MD	0.899618	0.370176	0.949245	1.33582
BCL11A	1.03499	0.370072	0.897986	0.748749
BCAT2	1.04214	0.369991	1.0774	1.17536
OR6C75	1.09858	0.369958	1.02542	1.0731
FUT2	1.19671	0.369821	1.25868	1.29393
SNTG1	1.02929	0.369796	0.92907	0.905213
CDKN1A	0.895888	0.369709	1.08325	0.850015
ADORA2B	1.30225	0.369545	1.03835	1.16642
MAML2	1.04918	0.369309	1.00951	0.873999
GNAQ	1.11513	0.369277	1.15387	1.06193
PHF10	1.08514	0.369204	1.01393	0.771681
LRRC41	0.945399	0.369059	0.86899	0.935424
RALGAPB	1.05827	0.369046	1.37873	1.10158
MKX	1.11621	0.368962	1.09284	1.00732
PCSK2	1.04551	0.36891	1.09549	1.11201
DPPA2	1.24027	0.368839	1.11066	1.03866
CHI3L1	0.938625	0.368804	1.08296	1.02444
RYR1	1.07926	0.368777	1.13218	0.988485
GATD1	0.996804	0.368507	1.15866	0.954311
EFCAB11	1.02055	0.368458	0.934144	1.27925
COLEC12	1.07333	0.368318	1.31953	1.06611
PRDM15	1.17608	0.368266	1.24095	1.41534
RTF1	0.941829	0.368256	0.901006	0.8144
TBC1D32	1.11607	0.368089	1.14355	1.16872
LAX1	1.16108	0.368042	0.938148	1.15221
MOGAT2	1.12938	0.368026	1.12566	1.20979
PTGDR2	1.11135	0.367833	1.07634	1.11568
FAM180B	0.980999	0.367826	0.909422	0.915294
CFAP44	1.02742	0.367724	0.856088	0.889843
CARMIL1	1.07519	0.367719	1.00106	1.00338
SLC25A23	0.894886	0.367674	1.00041	0.904686
SDR9C7	0.962007	0.367599	0.993832	1.10218
RAB4A	1.33141	0.367599	1.12596	1.24565
SIGLEC10	1.08817	0.367559	1.115	1.13808
TMEM63A	1.18137	0.367554	1.21539	1.02012
NUDT13	1.15708	0.367533	1.05026	1.05435
HOMER1	1.03344	0.36753	1.11528	1.11016
HOXA13	1.04129	0.367528	0.935547	1.05144
PPP1R14A	1.10743	0.367503	0.985346	1.20849
HEY1	1.24663	0.367483	1.09788	1.22316
CCL2	1.07181	0.36747	1.08068	1.13529
CEACAM5	1.0894	0.367442	0.974687	0.989264
EPOP	0.878793	0.367247	0.952917	0.782979
ITGAM	1.0492	0.367208	1.144	1.06712
TAF9	1.17067	0.367206	0.915335	1.0349
CCDC15	0.962129	0.367079	0.964477	1.0977
ME2	1.07324	0.366989	1.02276	0.970416
GALNT10	1.08242	0.366906	1.13382	1.0211
P4HA3	0.920761	0.366883	1.02332	1.06251
PROCA1	0.891139	0.366785	0.929166	0.811578
PGLYRP1	1.08569	0.366535	1.3371	1.09046
LRRK2	0.954612	0.36638	1.05503	0.915358
ZFP14	1.12579	0.366314	1.0142	1.02763
SLC14A1	1.02452	0.366131	1.08327	1.24082
DEFB115	1.10091	0.366077	1.13607	1.0204
STUM	1.1961	0.366031	1.21399	1.35943
TRIM63	0.912841	0.365964	1.01993	0.819546
ATP11A	1.05077	0.365894	1.0614	0.964565
YEATS4	1.07574	0.365837	0.778242	0.494519
RDX	0.941271	0.365671	0.859462	1.11479
ENGASE	0.857444	0.365646	0.941652	0.929517
SPIRE1	1.0447	0.365587	1.00115	1.09945
BAHD1	0.839664	0.365585	1.00612	0.834465
EML2	1.00142	0.365467	1.18522	1.29282
LRRC57	1.00007	0.365333	0.957896	0.844014
DIS3	0.634862	0.365254	0.289725	0.108252
TPM2	0.992411	0.365182	1.13869	1.18153
SCN1A	1.11312	0.365165	0.862373	0.838
ENDOG	1.12529	0.365134	0.972832	1.04528
NMT1	0.845103	0.365014	0.969658	0.834208
PWWP2B	1.21381	0.364926	1.13305	1.38244
EPB41L1	0.97521	0.364894	0.910155	0.92334
TM9SF1	0.900258	0.364818	1.07718	1.19751
ACSS2	0.967115	0.364781	0.77897	0.902563
MED29	1.11895	0.364701	0.910528	1.14556
ADGRG3	1.00516	0.364684	1.13279	1.09453
ASIC2	1.05235	0.364637	0.985394	1.03243
RBBP8	1.02364	0.364469	0.986889	1.07753
CD1E	0.889433	0.364407	0.967529	0.951952
FAM122B	1.09171	0.364367	1.15615	1.13872
EIF4G3	0.898082	0.364339	0.971778	0.935468
NPFF	1.10201	0.364328	1.10387	1.12331
SHCBP1	0.934746	0.364272	0.99577	0.956528
IFI16	0.981372	0.3642	1.10066	0.968409
LOXL2	1.06717	0.364133	1.16677	1.11984
SEC24B	1.39094	0.363966	1.21633	1.22629
CLDND2	1.0684	0.363932	1.03333	1.17522
SGCG	0.967057	0.363893	0.940187	0.983173
SREBF1	1.09005	0.363792	1.0789	1.12199
HSH2D	0.930275	0.36371	1.07667	0.905295
ZNF157	1.01638	0.36369	1.07025	1.12793
ZNF70	1.14886	0.363572	0.902554	0.878517
RCE1	1.00624	0.363562	0.868755	0.86122
OR10H1	1.31636	0.363469	1.19149	1.1645
S100A13	1.15144	0.363407	1.04908	1.15222
HFE	1.07099	0.363399	1.0057	1.01031
NAT14	1.05511	0.36329	1.17638	1.30737
PLEKHB1	1.01927	0.363276	1.12443	0.892625
PRR9	1.02633	0.36327	0.925584	1.16257
HNRNPDL	1.26925	0.363068	0.997829	1.03006
SSBP3-AS1	0.948662	0.363033	0.962691	0.947422
IGSF11	1.02257	0.36303	0.964527	1.07784
SMIM7	0.985318	0.362991	0.924877	1.09507
CCDC137	1.08452	0.362861	1.05615	0.967892
FMOD	1.21229	0.362842	1.20091	1.19769
IDO2	1.0971	0.362796	1.01555	1.04909
CD200R1	0.915558	0.362783	0.938791	1.06479
ZNF720	0.993148	0.362756	0.873413	0.970309
FAM186B	1.03425	0.362655	1.06985	1.14162
CH25H	1.15832	0.362455	1.23854	1.36707
KIFC2	0.984106	0.362428	0.972056	1.07231
ADRM1	1.14273	0.362322	0.995042	0.855554
NIPAL3	1.04317	0.362318	0.98092	0.853321
ARHGEF40	0.933781	0.362274	1.11653	0.843023
FOXP1	1.03827	0.362201	0.909357	0.821451
POGK	1.0077	0.362177	1.15842	1.43347
SSX5	1.03925	0.36215	0.957647	1.24587
CTSD	1.06116	0.362139	1.10589	1.1255
OR5A2	1.01309	0.361966	1.01204	1.03698
OR5AR1	1.13978	0.361942	1.2276	1.06846
FGFRL1	0.967449	0.361654	1.02282	0.83037
CBLC	1.00028	0.361636	1.07145	0.967478
KCNE4	1.28241	0.361629	1.02113	1.09037
NAGK	1.04246	0.361588	1.03878	1.02508
SCRT2	1.11162	0.361357	0.943099	0.897728
ZNF654	1.02913	0.361321	0.973641	1.05972
PGM2L1	0.961276	0.361213	1.0599	0.938754
MGRN1	1.01938	0.361156	1.0949	1.00924
OR10AD1	1.08336	0.360984	1.04376	1.20522
HK1	1.03337	0.360808	0.932442	0.949283
RAB40A	1.09646	0.360709	1.11851	1.01418
GFAP	0.881646	0.360568	1.00054	0.927227
MRPS15	0.581346	0.36049	0.672272	0.435827
PHOX2A	1.16372	0.360438	0.96503	1.1033
MAP3K6	0.849476	0.36037	0.931677	0.924241
DCXR	1.00057	0.360276	1.07269	1.04318
AP1G2	0.820399	0.360164	0.9778	0.936898
ELAVL3	1.2265	0.359894	1.01974	0.90181
MTRF1	0.833984	0.359711	0.684633	0.551879
KNCN	1.0266	0.359649	1.0498	1.16307
TMEM253	1.02677	0.359626	1.27135	1.17654
PCNX3	1.065	0.359349	1.13876	0.877341
KLHL3	0.870691	0.359332	1.03731	1.13025
DOK6	0.899895	0.359306	0.968975	1.05732
FAM217B	1.04703	0.359285	0.968093	1.01547
ZNF616	1.04821	0.359263	1.01147	1.07104
C14orf178	1.18533	0.359195	1.05998	1.00357
PDIK1L	1.12128	0.359174	0.85804	1.09878
PANK4	1.14201	0.359152	1.25885	1.32511
CD300LG	0.917319	0.35915	0.845866	0.776082
NFKBIB	1.07787	0.358819	1.09859	1.13393
STAB1	0.954983	0.358754	0.907284	0.962999
ACOT11	0.98703	0.358709	1.02494	1.13694
KRT19	0.947501	0.358675	1.02488	0.960532
RGS7	1.05196	0.358641	1.03933	1.25194
RREB1	1.0654	0.358516	1.07957	1.09161
TOP2B	0.932813	0.358322	0.927415	1.03566
NCF4	1.21498	0.358208	1.22266	1.23771
EIF4B	1.12018	0.358059	0.927693	0.727957
GBE1	1.12699	0.358016	1.00938	1.22614
TMEM125	0.985325	0.357951	0.957388	1.12269
SYN3	1.19318	0.357941	1.17537	1.13325
GNPTAB	1.04062	0.357912	1.08948	1.12017
CORO2A	1.0643	0.35788	1.10069	1.15632
GOLT1A	1.30135	0.357825	0.997401	1.08398
ZFYVE21	1.12799	0.357819	1.33442	1.30751
CALHM1	1.06963	0.35772	1.08384	1.19188
MYO10	0.979618	0.357718	1.02682	1.10762
NDC80	0.784502	0.357595	0.715089	0.53429
C6orf89	0.838089	0.357501	0.994521	0.842697
PAPOLG	0.945548	0.357386	1.11164	0.983501
CD160	0.983561	0.35738	1.14078	1.11881
SRR	0.907192	0.357318	1.0648	0.972372
TBC1D29P	0.923035	0.357287	1.10145	1.04279
C11orf86	1.10884	0.357253	1.03432	1.05959
WWOX	0.936888	0.35704	1.06096	1.17645
DGUOK	1.05106	0.357027	1.01069	1.12336
CA8	0.73916	0.356832	0.827371	0.662393
AXL	1.03759	0.356774	0.973879	1.01565
NUDCD1	0.93992	0.356666	0.910535	0.806152
TP53INP2	1.20159	0.356654	0.974653	0.80315
DNAH6	1.06396	0.356597	0.871028	0.880486
ADAD1	1.06023	0.35641	0.970292	1.15409
NUDT9	1.16854	0.35638	0.99974	1.18744
PTPRF	1.04834	0.356366	1.06536	0.972083
SIRPG	1.00537	0.356319	1.12596	1.03347
LZTS3	1.05775	0.356309	1.18185	1.2064
ZNF835	1.07694	0.356278	1.12142	1.14602
ESRRA	0.894835	0.356178	0.841862	0.997746
IL4I1	1.17856	0.356172	1.04788	1.28258
OR10J3	0.927624	0.356085	1.15383	0.919717
UBXN2A	1.11597	0.356044	0.945669	1.05356
COLCA1	1.12521	0.355913	1.18875	1.22733
GPR158	1.04775	0.35589	0.957504	0.966526
GPATCH3	0.923462	0.355885	1.02806	0.900331
PPDPFL	0.945758	0.355862	1.106	1.03771
ZNF235	1.01368	0.355813	0.923792	0.902253
CTHRC1	1.06846	0.355783	1.01059	0.990071
PNRC1	1.11705	0.355706	0.920961	1.03208
SLC30A1	0.955377	0.355674	0.907383	0.956463
STON2	1.09225	0.355627	1.22757	1.07258
PNPLA4	1.03598	0.355573	0.968013	0.990682
MRGBP	0.824047	0.355546	0.89496	0.731287
NECAP2	1.1574	0.35548	1.18207	1.31839
[truncated: 16,041 more rows]
