# Supplementary material for: The PLK4 inhibitor RP-1664 demonstrates potent efficacy in neuroblastoma preclinical models through a dual mechanism of sensitivity
Source: Nat Commun. 2026 Jun 13;17:7531. doi: 10.1038/s41467-026-74061-5 (PMC13408883; doi:10.1038/s41467-026-74061-5)
Supplement: Supplementary file 4 — S Data2 [file 41467_2026_74061_MOESM4_ESM.xlsx]

## Sheet: Sheet1
GENE	sumZ_C	numObs_C	normZ_C	pval_synth_C	rank_synth_C	fdr_synth_C	pval_supp_C	rank_supp_C	fdr_supp_C	sumZ_D	numObs_D	normZ_D	pval_synth_D	rank_synth_D	fdr_synth_D	pval_supp_D	rank_supp_D	fdr_supp_D		C = 50nM RP-1664
SMARCD1	-42.24	8	-11.21	1.8e-29	1	3.24e-25	1	18044	1	-4.69	8	-1.37	0.0853	872	0.91	0.915	17173	0.961		D = 150nM RP-1664
CYB5R4	-36.77	8	-9.75	9.3e-23	2	8.39e-19	1	18043	1	4.45	8	1.53	0.937	17210	0.982	0.0632	835	0.944
CAND1	-35.66	8	-9.45	1.65e-21	3	9.95e-18	1	18042	1	12.43	8	4.06	1	17960	1	2.46e-05	85	0.00523
KIFC1	-35.15	8	-9.32	5.91e-21	4	2.67e-17	1	18041	1	-10.66	8	-3.26	0.000551	23	0.433	0.999	18022	1
CCDC61	-33.84	8	-8.97	1.52e-19	5	5.5e-16	1	18040	1	-8.87	8	-2.69	0.00352	46	0.91	0.996	17999	0.999
CCNB1	-32.23	8	-8.54	6.8e-18	6	2.04e-14	1	18039	1	-20.7	8	-6.45	5.68e-11	3	3.42e-07	1	18042	1
TADA2B	-29.96	8	-7.93	1.08e-15	7	2.79e-12	1	18038	1	12.94	8	4.22	1	17969	1	1.22e-05	76	0.0029
BRD9	-29.09	8	-7.7	6.91e-15	8	1.56e-11	1	18037	1	-4.89	8	-1.43	0.076	747	0.91	0.924	17298	0.964
FBXO42	-28.37	8	-7.51	3.04e-14	9	5.49e-11	1	18036	1	13.21	8	4.31	1	17972	1	8.27e-06	73	0.00204
EP300	-28.37	8	-7.51	3.05e-14	10	5.49e-11	1	18035	1	3.02	8	1.08	0.859	16362	0.947	0.141	1683	0.944
CCDC14	-28.1	8	-7.43	5.27e-14	11	8.64e-11	1	18034	1	7.95	8	2.64	0.996	17801	1	0.00415	244	0.307
TADA1	-27.85	8	-7.37	8.65e-14	12	1.3e-10	1	18033	1	16.21	8	5.26	1	18010	1	7.36e-08	35	3.79e-05
PTPA	-27.51	8	-7.28	1.72e-13	13	2.39e-10	1	18032	1	7.93	8	2.63	0.996	17797	1	0.00426	248	0.31
TBCCD1	-26.67	8	-7.05	8.69e-13	14	1.05e-09	1	18031	1	-5.95	8	-1.77	0.0385	331	0.91	0.961	17714	0.979
TACC3	-26.67	8	-7.05	8.76e-13	15	1.05e-09	1	18030	1	-7.69	8	-2.32	0.0101	85	0.91	0.99	17960	0.995
MED16	-26.14	8	-6.91	2.4e-12	16	2.71e-09	1	18029	1	-7.72	8	-2.33	0.00992	84	0.91	0.99	17961	0.995
DCUN1D1	-25.55	8	-6.75	7.24e-12	17	7.68e-09	1	18028	1	-1.39	8	-0.32	0.374	6574	0.91	0.626	11471	0.944
CETN3	-25.31	8	-6.69	1.12e-11	18	1.12e-08	1	18027	1	-8.61	8	-2.61	0.00448	52	0.91	0.996	17993	0.998
KLF6	-24.64	8	-6.51	3.76e-11	19	3.57e-08	1	18026	1	-14.22	8	-4.39	5.67e-06	7	0.0146	1	18038	1
FBXW11	-24.19	8	-6.39	8.31e-11	20	7.5e-08	1	18025	1	-2.22	8	-0.58	0.279	4475	0.91	0.721	13570	0.944
E2F7	-23.38	8	-6.18	3.31e-10	21	2.84e-07	1	18024	1	-7.64	8	-2.3	0.0106	93	0.91	0.989	17952	0.994
SENP8	-23.22	8	-6.13	4.31e-10	22	3.53e-07	1	18023	1	1.6	8	0.63	0.734	14396	0.92	0.266	3649	0.944
CSNK1D	-22.97	8	-6.06	6.6e-10	23	5.18e-07	1	18022	1	6.1	8	2.05	0.98	17592	1	0.0201	453	0.802
RPRD1B	-22.84	8	-6.03	8.15e-10	24	6.13e-07	1	18021	1	-13.41	8	-4.14	1.77e-05	8	0.0358	1	18037	1
TAF5L	-22.31	8	-5.89	1.94e-09	25	1.4e-06	1	18020	1	14.91	8	4.84	1	17997	1	6.35e-07	48	0.000239
CDK5RAP2	-22.12	8	-5.84	2.62e-09	26	1.82e-06	1	18019	1	-16.69	8	-5.17	1.14e-07	6	0.000343	1	18039	1
SP3	-22.02	8	-5.81	3.11e-09	27	2.08e-06	1	18018	1	1.8	8	0.69	0.754	14768	0.921	0.246	3277	0.944
CDK2	-21.71	8	-5.73	5.07e-09	28	3.27e-06	1	18017	1	-8.54	8	-2.59	0.00481	53	0.91	0.995	17992	0.998
MAP4	-20.02	8	-5.28	6.57e-08	29	3.98e-05	1	18016	1	-8.87	8	-2.7	0.00351	45	0.91	0.996	18000	0.999
BICRA	-20.01	8	-5.28	6.62e-08	30	3.98e-05	1	18015	1	-3.71	8	-1.06	0.145	1794	0.91	0.855	16251	0.95
CCDC18	-19.96	8	-5.26	7.17e-08	31	4.17e-05	1	18014	1	5.84	8	1.97	0.976	17549	1	0.0245	496	0.891
CCDC6	-19.24	8	-5.07	1.98e-07	32	0.000112	1	18013	1	10.73	8	3.52	1	17921	1	0.000216	124	0.0314
TAF6L	-18.59	8	-4.9	4.88e-07	33	0.000267	1	18012	1	9.61	8	3.16	0.999	17884	1	0.000779	161	0.0873
CHD2	-18.21	8	-4.79	8.21e-07	34	0.000436	1	18011	1	-0.95	8	-0.18	0.427	7824	0.91	0.573	10221	0.944
NXT1	-18.05	8	-4.75	1e-06	35	0.000518	1	18010	1	14.47	8	4.71	1	17993	1	1.27e-06	52	0.00044
CCDC138	-17.79	8	-4.68	1.41e-06	36	0.000707	1	18009	1	-0.27	8	0.03	0.513	9832	0.91	0.487	8213	0.944
PLK2	-17.31	8	-4.56	2.62e-06	37	0.00128	1	18008	1	-5.05	8	-1.48	0.0688	657	0.91	0.931	17388	0.966
KAT2A	-16.87	8	-4.44	4.56e-06	38	0.00217	1	18007	1	-0.7	8	-0.1	0.458	8599	0.91	0.542	9446	0.944
KEAP1	-16.58	8	-4.36	6.52e-06	39	0.00302	1	18006	1	10.77	8	3.53	1	17923	1	0.000206	122	0.0305
NMT1	-16.34	8	-4.3	8.72e-06	40	0.00386	1	18005	1	-7.01	8	-2.11	0.0176	135	0.91	0.982	17910	0.99
CSNK1E	-16.34	8	-4.29	8.77e-06	41	0.00386	1	18004	1	6.37	8	2.14	0.984	17646	1	0.0163	399	0.735
HSBP1	-16.16	8	-4.25	1.08e-05	42	0.00466	1	18003	1	-11.16	8	-3.42	0.00031	17	0.318	1	18028	1
TIPRL	-15.89	8	-4.17	1.5e-05	43	0.00628	1	18002	1	1.94	8	0.73	0.768	14999	0.924	0.232	3046	0.944
CREBBP	-15.78	8	-4.15	1.69e-05	44	0.00694	1	18001	1	5.27	8	1.79	0.963	17421	0.998	0.0369	624	0.944
LRRCC1	-15.59	8	-4.1	2.1e-05	45	0.00844	1	18000	1	-0.75	8	-0.12	0.452	8444	0.91	0.548	9601	0.944
KATNB1	-15.51	8	-4.07	2.31e-05	46	0.00891	1	17999	1	-21.43	8	-6.68	1.22e-11	1	2.2e-07	1	18044	1
CDK13	-15.51	8	-4.07	2.32e-05	47	0.00891	1	17998	1	-2.39	8	-0.64	0.261	4059	0.91	0.739	13986	0.944
MAP2K7	-15.28	8	-4.01	3e-05	48	0.0113	1	17997	1	-2.99	8	-0.83	0.203	2825	0.91	0.797	15220	0.944
PPOX	-15.14	8	-3.97	3.53e-05	49	0.013	1	17996	1	-7.59	8	-2.29	0.0111	97	0.91	0.989	17948	0.994
PAN2	-14.79	8	-3.88	5.19e-05	50	0.0187	1	17995	1	-17.34	8	-5.38	3.73e-08	5	0.000135	1	18040	1
MRPL4	-14.74	8	-3.87	5.47e-05	51	0.0193	1	17994	1	-5.59	8	-1.66	0.0489	443	0.91	0.951	17602	0.975
IQCC	-14.6	8	-3.83	6.42e-05	52	0.0223	1	17993	1	-6.36	8	-1.9	0.0287	249	0.91	0.971	17796	0.985
FECH	-14.52	8	-3.81	6.95e-05	53	0.0237	1	17992	1	-6.92	8	-2.08	0.0189	146	0.91	0.981	17899	0.989
LCMT1	-14.34	8	-3.76	8.47e-05	54	0.0281	1	17991	1	-1.22	8	-0.27	0.394	7059	0.91	0.606	10986	0.944
MRPS18B	-14.32	8	-3.76	8.63e-05	55	0.0281	1	17990	1	-7.5	8	-2.26	0.0119	107	0.91	0.988	17938	0.994
MRPL57	-14.31	8	-3.75	8.72e-05	56	0.0281	1	17989	1	-2.53	8	-0.68	0.247	3731	0.91	0.753	14314	0.944
IGLON5	-14.12	8	-3.7	0.000107	57	0.0337	1	17988	1	-4.29	8	-1.24	0.107	1170	0.91	0.893	16875	0.955
CCNE2	-14.1	8	-3.7	0.000109	58	0.0339	1	17987	1	-6.96	8	-2.09	0.0184	143	0.91	0.982	17902	0.989
GIGYF2	-14.06	8	-3.69	0.000114	59	0.0349	1	17986	1	-8.02	8	-2.42	0.00767	70	0.91	0.992	17975	0.996
MRPS12	-13.98	8	-3.67	0.000123	60	0.0371	1	17985	1	-4.73	8	-1.38	0.0832	840	0.91	0.917	17205	0.961
IBA57	-13.8	8	-3.62	0.00015	61	0.0443	1	17984	1	-0.79	8	-0.13	0.447	8327	0.91	0.553	9718	0.944
EDC3	-13.5	8	-3.54	0.000204	62	0.0592	1	17983	1	-3.6	8	-1.02	0.153	1939	0.91	0.847	16106	0.949
KIRREL1	-13.42	8	-3.52	0.000219	63	0.0628	1	17982	1	-3.7	8	-1.06	0.145	1803	0.91	0.855	16242	0.949
NDUFA9	-13.38	8	-3.5	0.000229	64	0.0646	1	17981	1	-5.39	8	-1.59	0.0556	520	0.91	0.944	17525	0.972
FLCN	-13.36	8	-3.5	0.000233	65	0.0647	1	17980	1	-2.46	8	-0.66	0.254	3881	0.91	0.746	14164	0.944
PCBP2	-13.33	8	-3.49	0.00024	66	0.0655	1	17979	1	-7.47	8	-2.25	0.0122	109	0.91	0.988	17936	0.994
KIAA1328	-13.28	8	-3.48	0.000251	67	0.0671	1	17978	1	-10.03	8	-3.06	0.00109	28	0.704	0.999	18017	1
SP1	-13.28	8	-3.48	0.000253	68	0.0671	1	17977	1	14.93	8	4.85	1	17998	1	6.12e-07	47	0.000235
SUPT20H	-13.06	8	-3.42	0.000313	69	0.0818	1	17976	1	13.34	8	4.35	1	17974	1	6.87e-06	71	0.00175
MRPL41	-12.99	8	-3.4	0.000335	70	0.0864	1	17975	1	-5.87	8	-1.74	0.0405	356	0.91	0.959	17689	0.979
DNAJC13	-12.97	8	-3.39	0.000344	71	0.0874	1	17974	1	-7.35	8	-2.21	0.0134	119	0.91	0.987	17926	0.993
C12orf65	-12.94	8	-3.39	0.000352	72	0.0881	1	17973	1	-6.53	8	-1.95	0.0255	218	0.91	0.975	17827	0.986
CRAMP1	-12.89	8	-3.37	0.000372	73	0.092	1	17972	1	-6.32	8	-1.89	0.0296	259	0.91	0.97	17786	0.984
MRPS22	-12.86	8	-3.37	0.000382	74	0.0932	1	17971	1	-7.6	8	-2.29	0.0109	96	0.91	0.989	17949	0.994
LAMTOR2	-12.84	8	-3.36	0.000389	75	0.0936	1	17970	1	-1.73	8	-0.43	0.333	5681	0.91	0.667	12364	0.944
TSFM	-12.8	8	-3.35	0.000405	76	0.0961	1	17969	1	-1.92	8	-0.49	0.312	5168	0.91	0.688	12877	0.944
CNOT7	-12.76	8	-3.34	0.000419	77	0.0981	1	17968	1	-4.46	8	-1.3	0.0974	1038	0.91	0.903	17007	0.957
MRPL40	-12.74	8	-3.33	0.000429	78	0.0993	1	17967	1	-1.46	8	-0.35	0.365	6368	0.91	0.635	11677	0.944
FBXL18	-12.66	8	-3.31	0.000464	79	0.106	1	17966	1	-0.36	8	0	0.501	9570	0.91	0.499	8475	0.944
CWC27	-12.57	8	-3.29	0.000502	80	0.113	0.999	17965	1	-2.43	8	-0.65	0.256	3943	0.91	0.744	14102	0.944
CCNB2	-12.54	8	-3.28	0.000517	81	0.115	0.999	17964	1	-6.62	8	-1.98	0.0237	194	0.91	0.976	17851	0.987
RCC1L	-12.45	8	-3.26	0.000564	82	0.122	0.999	17963	1	-1.93	8	-0.49	0.311	5145	0.91	0.689	12900	0.944
YBEY	-12.45	8	-3.26	0.000566	83	0.122	0.999	17962	1	-3.64	8	-1.04	0.15	1872	0.91	0.85	16173	0.949
XPO6	-12.45	8	-3.26	0.000567	84	0.122	0.999	17961	1	-11.02	8	-3.38	0.000366	20	0.33	1	18025	1
LAMTOR1	-12.36	8	-3.23	0.000613	85	0.13	0.999	17960	1	-2.22	8	-0.59	0.278	4450	0.91	0.722	13595	0.944
MAD1L1	-12.24	8	-3.2	0.000684	86	0.144	0.999	17959	1	-4.24	8	-1.23	0.11	1214	0.91	0.89	16831	0.954
KIF2A	-12.21	8	-3.19	0.000703	87	0.146	0.999	17958	1	-0.7	8	-0.1	0.459	8610	0.91	0.541	9435	0.944
PELP1	-11.4	7	-3.19	0.000723	88	0.148	0.999	17957	1	-5.93	8	-1.76	0.039	335	0.91	0.961	17710	0.979
CPOX	-12.13	8	-3.17	0.000758	89	0.154	0.999	17956	1	-4.44	8	-1.29	0.0983	1055	0.91	0.902	16990	0.957
MRPS16	-12.08	8	-3.16	0.000797	90	0.16	0.999	17955	1	-5.76	8	-1.71	0.0439	380	0.91	0.956	17665	0.977
HARS2	-12.06	8	-3.15	0.000811	91	0.161	0.999	17954	1	-2.7	8	-0.74	0.23	3372	0.91	0.77	14673	0.944
VGLL4	-11.96	8	-3.12	0.000891	92	0.175	0.999	17953	1	-6.92	8	-2.08	0.019	149	0.91	0.981	17896	0.989
NDUFA11	-11.92	8	-3.11	0.000922	93	0.178	0.999	17952	1	-6.39	8	-1.91	0.0282	246	0.91	0.972	17799	0.985
DMAC1	-11.91	8	-3.11	0.000927	94	0.178	0.999	17951	1	-6.08	8	-1.81	0.0352	300	0.91	0.965	17745	0.981
PLPP3	-11.85	8	-3.1	0.000982	95	0.185	0.999	17950	1	-7.62	8	-2.3	0.0108	95	0.91	0.989	17950	0.994
ELOA	-11.84	8	-3.09	0.000985	96	0.185	0.999	17949	1	-8.47	8	-2.57	0.00509	54	0.91	0.995	17991	0.998
POLG2	-11.82	8	-3.09	0.001	97	0.187	0.999	17948	1	-0.46	8	-0.03	0.489	9321	0.91	0.511	8724	0.944
PHF12	-11.8	8	-3.08	0.00103	98	0.19	0.999	17947	1	-4.18	8	-1.21	0.113	1260	0.91	0.887	16785	0.953
TFB1M	-11.78	8	-3.08	0.00104	99	0.19	0.999	17946	1	-1.97	8	-0.51	0.306	5059	0.91	0.694	12986	0.944
TWNK	-11.75	8	-3.07	0.00107	100	0.193	0.999	17945	1	0.18	8	0.17	0.569	11197	0.91	0.431	6848	0.944
GMEB1	-11.72	8	-3.06	0.0011	101	0.196	0.999	17944	1	-1.85	8	-0.47	0.32	5349	0.91	0.68	12696	0.944
BIRC6	-11.62	8	-3.04	0.0012	102	0.211	0.999	17943	1	-5.7	8	-1.69	0.0456	399	0.91	0.954	17646	0.976
KLHL18	-11.62	8	-3.03	0.00121	103	0.211	0.999	17942	1	-1.09	8	-0.23	0.409	7425	0.91	0.591	10620	0.944
TSC2	-11.53	8	-3.01	0.0013	104	0.224	0.999	17941	1	-4.02	8	-1.16	0.124	1422	0.91	0.876	16623	0.951
QRSL1	-11.53	8	-3.01	0.00131	105	0.224	0.999	17940	1	2.56	8	0.93	0.824	15860	0.937	0.176	2185	0.944
SAAL1	-11.48	8	-3	0.00136	106	0.232	0.999	17939	1	-5.52	8	-1.63	0.0514	469	0.91	0.949	17576	0.974
TSC1	-11.47	8	-2.99	0.00138	107	0.232	0.999	17938	1	-6.29	8	-1.88	0.0303	269	0.91	0.97	17776	0.984
KHDRBS1	-11.43	8	-2.98	0.00142	108	0.237	0.999	17937	1	-0.6	8	-0.07	0.471	8883	0.91	0.529	9162	0.944
EARS2	-11.36	8	-2.97	0.00151	109	0.249	0.998	17936	1	-4.35	8	-1.26	0.104	1122	0.91	0.896	16923	0.956
NRBP1	-11.3	8	-2.95	0.00159	110	0.26	0.998	17935	1	-2.05	8	-0.53	0.297	4873	0.91	0.703	13172	0.944
CETN2	-11.27	8	-2.94	0.00163	111	0.265	0.998	17934	1	-2.8	8	-0.77	0.22	3174	0.91	0.78	14871	0.944
PET117	-15.87	16	-2.93	0.0017	112	0.274	0.998	17933	1	-1.84	16	-0.29	0.384	6836	0.91	0.616	11209	0.944
HSD17B10	-11.21	8	-2.92	0.00172	113	0.274	0.998	17932	1	-0.22	8	0.05	0.52	10027	0.91	0.48	8018	0.944
MRM2	-11.2	8	-2.92	0.00173	114	0.274	0.998	17931	1	-6.04	8	-1.8	0.0362	309	0.91	0.964	17736	0.981
EIF4E2	-11.19	8	-2.92	0.00175	115	0.274	0.998	17930	1	-3.54	8	-1.01	0.157	2001	0.91	0.843	16044	0.948
MARS2	-11.16	8	-2.91	0.00179	116	0.279	0.998	17929	1	-3.27	8	-0.92	0.179	2368	0.91	0.821	15677	0.945
HMBS	-11.11	8	-2.9	0.00188	117	0.29	0.998	17928	1	-9.73	8	-2.97	0.0015	32	0.846	0.999	18013	1
NFYA	-11.09	8	-2.89	0.0019	118	0.291	0.998	17927	1	0.15	8	0.16	0.565	11092	0.91	0.435	6953	0.944
UQCRC2	-11.02	8	-2.87	0.00203	119	0.308	0.998	17926	1	-5.38	8	-1.59	0.056	523	0.91	0.944	17522	0.972
LENG8	-10.98	8	-2.86	0.00209	120	0.313	0.998	17925	1	4.94	8	1.69	0.954	17343	0.993	0.046	702	0.944
GGNBP2	-10.98	8	-2.86	0.0021	121	0.313	0.998	17924	1	7.62	8	2.54	0.994	17773	1	0.00562	272	0.373
NOSIP	-10.96	8	-2.86	0.00213	122	0.315	0.998	17923	1	-0.55	8	-0.06	0.477	9059	0.91	0.523	8986	0.944
CLPB	-10.76	8	-2.81	0.00251	123	0.369	0.997	17922	1	1.83	8	0.7	0.757	14821	0.922	0.243	3224	0.944
ELAVL1	-10.73	8	-2.8	0.00257	124	0.373	0.997	17921	1	-4.25	8	-1.23	0.109	1211	0.91	0.891	16834	0.955
MRPL34	-10.73	8	-2.8	0.00259	125	0.373	0.997	17920	1	-2.42	8	-0.65	0.258	3979	0.91	0.742	14066	0.944
MRPS14	-10.65	8	-2.78	0.00275	126	0.394	0.997	17919	1	-4.88	8	-1.43	0.0763	749	0.91	0.924	17296	0.964
RARS2	-10.64	8	-2.77	0.00278	127	0.395	0.997	17918	1	-2.52	8	-0.68	0.247	3746	0.91	0.753	14299	0.944
COA5	-10.62	8	-2.77	0.00283	128	0.395	0.997	17917	1	-6.76	8	-2.03	0.0214	173	0.91	0.979	17872	0.988
MRPS11	-10.62	8	-2.77	0.00283	129	0.395	0.997	17916	1	-5.34	8	-1.58	0.0576	543	0.91	0.942	17502	0.972
NME6	-10.6	8	-2.76	0.00288	130	0.395	0.997	17915	1	-2.11	8	-0.55	0.29	4714	0.91	0.71	13331	0.944
NSUN3	-10.59	8	-2.76	0.00289	131	0.395	0.997	17914	1	-3.78	8	-1.08	0.14	1704	0.91	0.86	16341	0.95
COX19	-10.58	8	-2.76	0.00291	132	0.395	0.997	17913	1	-2.9	8	-0.8	0.212	3013	0.91	0.788	15032	0.944
RPUSD3	-10.58	8	-2.76	0.00291	133	0.395	0.997	17912	1	-2.19	8	-0.58	0.282	4536	0.91	0.718	13509	0.944
TBRG4	-10.53	8	-2.74	0.00303	134	0.408	0.997	17911	1	-6.5	8	-1.94	0.0259	224	0.91	0.974	17821	0.986
YME1L1	-10.5	8	-2.74	0.0031	135	0.414	0.997	17910	1	-6.74	8	-2.02	0.0218	177	0.91	0.978	17868	0.988
GFM1	-10.5	8	-2.73	0.00312	136	0.414	0.997	17909	1	-4.04	8	-1.16	0.122	1402	0.91	0.878	16643	0.952
CCNF	-10.48	8	-2.73	0.00316	137	0.417	0.997	17908	1	-1.45	8	-0.34	0.366	6386	0.91	0.634	11659	0.944
MALSU1	-10.46	8	-2.73	0.00321	138	0.42	0.997	17907	1	-5.51	8	-1.63	0.0516	475	0.91	0.948	17570	0.974
CDKN2D	-10.42	8	-2.71	0.00332	139	0.424	0.997	17906	1	-5.72	8	-1.7	0.0449	393	0.91	0.955	17652	0.976
CUL1	-10.41	8	-2.71	0.00333	140	0.424	0.997	17905	1	-2.39	8	-0.64	0.261	4057	0.91	0.739	13988	0.944
BRD4	-10.41	8	-2.71	0.00334	141	0.424	0.997	17904	1	2.12	8	0.79	0.785	15293	0.926	0.215	2752	0.944
COQ6	-10.41	8	-2.71	0.00335	142	0.424	0.997	17903	1	-2.71	8	-0.74	0.229	3351	0.91	0.771	14694	0.944
MRPL28	-10.4	8	-2.71	0.00337	143	0.424	0.997	17902	1	-3.62	8	-1.03	0.152	1915	0.91	0.848	16130	0.949
MRPS2	-10.4	8	-2.71	0.00339	144	0.424	0.997	17901	1	-4.52	8	-1.31	0.0944	994	0.91	0.906	17051	0.958
ANKRD36C	-10.34	8	-2.69	0.00353	145	0.439	0.996	17900	1	-2.77	8	-0.76	0.224	3248	0.91	0.776	14797	0.944
LARS2	-10.3	8	-2.68	0.00365	146	0.452	0.996	17899	1	-3.16	8	-0.88	0.188	2552	0.91	0.812	15493	0.944
TRMT10C	-10.25	8	-2.67	0.00379	147	0.465	0.996	17898	1	-0.25	8	0.04	0.515	9911	0.91	0.485	8134	0.944
UBE3D	-10.25	8	-2.67	0.00382	148	0.465	0.996	17897	1	-2.45	8	-0.66	0.255	3905	0.91	0.745	14140	0.944
TIMM13	-10.24	8	-2.67	0.00384	149	0.465	0.996	17896	1	3.7	8	1.29	0.902	16867	0.965	0.0983	1178	0.944
MRPL37	-10.23	8	-2.66	0.00388	150	0.466	0.996	17895	1	-4.57	8	-1.33	0.0916	960	0.91	0.908	17085	0.959
STYX	-10.21	8	-2.66	0.00393	151	0.47	0.996	17894	1	-2.63	8	-0.72	0.237	3505	0.91	0.763	14540	0.944
RBM25	-8.78	6	-2.64	0.00415	152	0.486	0.996	17893	1	-2.57	6	-0.82	0.205	2880	0.91	0.795	15165	0.944
CYCS	-5.07	2	-2.64	0.00416	153	0.486	0.996	17892	1	-3.28	2	-1.96	0.025	212	0.91	0.975	17833	0.987
CABIN1	-10.13	8	-2.64	0.00417	154	0.486	0.996	17891	1	-12.03	8	-3.7	0.000109	12	0.164	1	18033	1
YTHDC1	-10.13	8	-2.64	0.00419	155	0.486	0.996	17890	1	-1.58	8	-0.38	0.35	6049	0.91	0.65	11996	0.944
PPP4R3A	-10.13	8	-2.64	0.0042	156	0.486	0.996	17889	1	-5.37	8	-1.59	0.0564	528	0.91	0.944	17517	0.972
ACAD9	-10.05	8	-2.62	0.00444	157	0.51	0.996	17888	1	-6.72	8	-2.01	0.0221	181	0.91	0.978	17864	0.988
FLI1	-10.01	8	-2.61	0.00458	158	0.523	0.995	17887	1	-3.09	8	-0.86	0.194	2666	0.91	0.806	15379	0.944
HSP90AB1	-10.01	8	-2.6	0.00461	159	0.523	0.995	17886	1	6.02	8	2.03	0.979	17580	1	0.0214	465	0.829
CDC25B	-9.98	8	-2.6	0.00471	160	0.528	0.995	17885	1	-1.03	8	-0.21	0.417	7611	0.91	0.583	10434	0.944
PALB2	-9.98	8	-2.6	0.00471	161	0.528	0.995	17884	1	-3.31	8	-0.93	0.176	2312	0.91	0.824	15733	0.945
UROD	-9.96	8	-2.59	0.00476	162	0.531	0.995	17883	1	-3.34	8	-0.94	0.173	2255	0.91	0.827	15790	0.945
PUM1	-9.95	8	-2.59	0.0048	163	0.532	0.995	17882	1	13.35	8	4.35	1	17975	1	6.8e-06	70	0.00175
HCCS	-9.93	8	-2.58	0.00489	164	0.536	0.995	17881	1	-1.76	8	-0.44	0.33	5576	0.91	0.67	12469	0.944
ADAMDEC1	-9.93	8	-2.58	0.0049	165	0.536	0.995	17880	1	-2.6	8	-0.71	0.239	3561	0.91	0.761	14484	0.944
SP8	-9.9	8	-2.58	0.00499	166	0.543	0.995	17879	1	-3.74	8	-1.07	0.143	1765	0.91	0.857	16280	0.95
ALAD	-9.87	8	-2.57	0.00511	167	0.552	0.995	17878	1	-4.08	8	-1.17	0.12	1373	0.91	0.88	16672	0.952
MRTFA	-9.86	8	-2.56	0.00517	168	0.555	0.995	17877	1	-11.43	8	-3.51	0.000228	14	0.294	1	18031	1
MTPAP	-9.84	8	-2.56	0.00523	169	0.558	0.995	17876	1	-1.76	8	-0.44	0.329	5574	0.91	0.671	12471	0.944
ADNP2	-9.83	8	-2.56	0.00528	170	0.558	0.995	17875	1	-7.43	8	-2.24	0.0126	114	0.91	0.987	17931	0.994
MED25	-9.81	8	-2.55	0.00535	171	0.558	0.995	17874	1	0.7	8	0.34	0.633	12545	0.91	0.367	5500	0.944
DOCK6	-9.81	8	-2.55	0.00536	172	0.558	0.995	17873	1	-5.2	8	-1.53	0.063	590	0.91	0.937	17455	0.969
MRPS34	-9.81	8	-2.55	0.00537	173	0.558	0.995	17872	1	-1.7	8	-0.42	0.337	5759	0.91	0.663	12286	0.944
DMAC2	-9.81	8	-2.55	0.00538	174	0.558	0.995	17871	1	-3.12	8	-0.87	0.192	2608	0.91	0.808	15437	0.944
SUCNR1	-9.76	8	-2.54	0.00558	175	0.572	0.994	17870	1	-3.4	8	-0.96	0.169	2182	0.91	0.831	15863	0.946
YARS2	-9.76	8	-2.54	0.00559	176	0.572	0.994	17869	1	1.12	8	0.47	0.681	13504	0.91	0.319	4541	0.944
GFM2	-9.75	8	-2.54	0.00561	177	0.572	0.994	17868	1	-2.97	8	-0.82	0.205	2874	0.91	0.795	15171	0.944
TMEM221	-9.72	8	-2.53	0.00575	178	0.58	0.994	17867	1	-0.08	8	0.09	0.537	10445	0.91	0.463	7600	0.944
ALAS1	-9.72	8	-2.53	0.00575	179	0.58	0.994	17866	1	-3.84	8	-1.1	0.135	1628	0.91	0.865	16417	0.95
BICRAL	-9.71	8	-2.52	0.0058	180	0.581	0.994	17865	1	-1.37	8	-0.32	0.375	6616	0.91	0.625	11429	0.944
ARIH1	-9.7	8	-2.52	0.00583	181	0.581	0.994	17864	1	-1.86	8	-0.47	0.319	5335	0.91	0.681	12710	0.944
MRPS28	-9.69	8	-2.52	0.00586	182	0.581	0.994	17863	1	-3.53	8	-1	0.158	2012	0.91	0.842	16033	0.947
CHD1	-9.67	8	-2.51	0.00597	183	0.589	0.994	17862	1	-3.79	8	-1.08	0.139	1686	0.91	0.861	16359	0.95
TSTD1	-9.62	8	-2.5	0.00617	184	0.605	0.994	17861	1	-4.14	8	-1.19	0.116	1299	0.91	0.884	16746	0.952
FBN3	-9.61	8	-2.5	0.00626	185	0.608	0.994	17860	1	-4.74	8	-1.39	0.0827	828	0.91	0.917	17217	0.961
UBE4B	-9.6	8	-2.5	0.00628	186	0.608	0.994	17859	1	-1.34	8	-0.31	0.379	6705	0.91	0.621	11340	0.944
EHMT2	-9.59	8	-2.49	0.00633	187	0.608	0.994	17858	1	-5.27	8	-1.55	0.0602	565	0.91	0.94	17480	0.97
RPS12	-6.78	4	-2.49	0.00636	188	0.608	0.994	17857	1	-4.16	4	-1.75	0.0401	349	0.91	0.96	17696	0.979
NDUFS3	-9.58	8	-2.49	0.00637	189	0.608	0.994	17856	1	-4.54	8	-1.32	0.0933	985	0.91	0.907	17060	0.959
SGF29	-9.55	8	-2.48	0.00653	190	0.62	0.993	17855	1	9.1	8	3	0.999	17857	1	0.00134	188	0.128
TRAP1	-9.54	8	-2.48	0.00656	191	0.62	0.993	17854	1	-4.7	8	-1.37	0.085	867	0.91	0.915	17178	0.961
MRPL17	-9.52	8	-2.47	0.00669	192	0.629	0.993	17853	1	-5.48	8	-1.62	0.0526	489	0.91	0.947	17556	0.974
MRPL47	-9.5	8	-2.47	0.00676	193	0.631	0.993	17852	1	-3.81	8	-1.09	0.138	1669	0.91	0.862	16376	0.95
ZFR	-9.5	8	-2.47	0.00679	194	0.631	0.993	17851	1	-1.96	8	-0.5	0.307	5088	0.91	0.693	12957	0.944
NDUFAF4	-9.49	8	-2.47	0.00685	195	0.634	0.993	17850	1	-5.84	8	-1.73	0.0414	363	0.91	0.959	17682	0.978
FKBP3	-9.47	8	-2.46	0.00691	196	0.636	0.993	17849	1	-2.78	8	-0.76	0.222	3214	0.91	0.778	14831	0.944
SUPV3L1	-9.47	8	-2.46	0.00695	197	0.636	0.993	17848	1	0.12	8	0.16	0.562	11023	0.91	0.438	7022	0.944
BCS1L	-9.46	8	-2.46	0.00698	198	0.636	0.993	17847	1	-0.89	8	-0.16	0.435	8008	0.91	0.565	10037	0.944
RRAGC	-9.43	8	-2.45	0.00715	199	0.648	0.993	17846	1	-5.66	8	-1.68	0.0467	419	0.91	0.953	17626	0.976
CNTFR	-9.42	8	-2.45	0.0072	200	0.65	0.993	17845	1	-2	8	-0.52	0.302	4973	0.91	0.698	13072	0.944
MRPL42	-9.41	8	-2.45	0.00724	201	0.65	0.993	17844	1	-1	8	-0.2	0.421	7679	0.91	0.579	10366	0.944
MYO1C	-9.38	8	-2.44	0.00743	202	0.664	0.993	17843	1	-4.57	8	-1.33	0.0918	965	0.91	0.908	17080	0.959
ZFP36L1	-9.36	8	-2.43	0.00751	203	0.668	0.992	17842	1	0.74	8	0.35	0.637	12627	0.91	0.363	5418	0.944
CNOT6L	-9.35	8	-2.43	0.00757	204	0.67	0.992	17841	1	5.7	8	1.93	0.973	17527	1	0.0271	518	0.943
CARS2	-9.32	8	-2.42	0.00775	205	0.681	0.992	17840	1	-5.64	8	-1.67	0.0474	427	0.91	0.953	17618	0.976
SIRPG	-9.3	8	-2.42	0.00786	206	0.681	0.992	17839	1	-4.01	8	-1.15	0.124	1433	0.91	0.876	16612	0.951
TMEM181	-9.3	8	-2.42	0.00786	207	0.681	0.992	17838	1	-0.4	8	-0.01	0.496	9466	0.91	0.504	8579	0.944
DAP3	-9.3	8	-2.41	0.00788	208	0.681	0.992	17837	1	-2.95	8	-0.82	0.206	2908	0.91	0.794	15137	0.944
HDGFL2	-9.29	8	-2.41	0.00789	209	0.681	0.992	17836	1	-1.86	8	-0.47	0.318	5321	0.91	0.682	12724	0.944
HIF1AN	-9.27	8	-2.41	0.00802	210	0.687	0.992	17835	1	-0.75	8	-0.12	0.452	8455	0.91	0.548	9590	0.944
ASF1A	-9.27	8	-2.41	0.00803	211	0.687	0.992	17834	1	-10.3	8	-3.15	0.000819	26	0.569	0.999	18019	1
DTNBP1	-9.22	8	-2.39	0.00832	212	0.708	0.992	17833	1	-5.48	8	-1.62	0.0525	488	0.91	0.947	17557	0.974
AARS2	-9.21	8	-2.39	0.00841	213	0.712	0.992	17832	1	-2.01	8	-0.52	0.302	4970	0.91	0.698	13075	0.944
CCNA2	-7.96	6	-2.39	0.00848	214	0.713	0.992	17831	1	-5.33	7	-1.69	0.0456	400	0.91	0.954	17645	0.976
MRPL11	-9.19	8	-2.38	0.00855	215	0.713	0.991	17830	1	-1.99	8	-0.51	0.304	5015	0.91	0.696	13030	0.944
LRFN4	-9.18	8	-2.38	0.00855	216	0.713	0.991	17829	1	-5.22	8	-1.54	0.0622	585	0.91	0.938	17460	0.969
RBFA	-9.17	8	-2.38	0.00864	217	0.713	0.991	17828	1	0.25	8	0.2	0.577	11341	0.91	0.423	6704	0.944
PHF23	-9.17	8	-2.38	0.00866	218	0.713	0.991	17827	1	-2.28	8	-0.61	0.272	4293	0.91	0.728	13752	0.944
SRSF10	-9.16	8	-2.38	0.00868	219	0.713	0.991	17826	1	3.33	8	1.17	0.88	16616	0.955	0.12	1429	0.944
RNF113A	-9.15	8	-2.38	0.00874	220	0.713	0.991	17825	1	-0.49	8	-0.04	0.485	9235	0.91	0.515	8810	0.944
GAMT	-9.15	8	-2.38	0.00876	221	0.713	0.991	17824	1	-2.9	8	-0.8	0.211	3004	0.91	0.789	15041	0.944
FAM184B	-9.15	8	-2.37	0.0088	222	0.713	0.991	17823	1	-1	8	-0.2	0.42	7670	0.91	0.58	10375	0.944
ISCA2	-9.14	8	-2.37	0.00882	223	0.713	0.991	17822	1	-1.19	8	-0.26	0.397	7154	0.91	0.603	10891	0.944
HLX	-9.12	8	-2.37	0.00895	224	0.721	0.991	17821	1	-4.2	8	-1.21	0.113	1247	0.91	0.887	16798	0.953
MTRF1L	-9.09	8	-2.36	0.00917	225	0.734	0.991	17820	1	-6.32	8	-1.89	0.0297	260	0.91	0.97	17785	0.984
PIGK	-9.08	8	-2.36	0.00919	226	0.734	0.991	17819	1	-3.5	8	-0.99	0.161	2052	0.91	0.839	15993	0.947
WDR75	-7.86	6	-2.36	0.00926	227	0.736	0.991	17818	1	-1.7	7	-0.46	0.323	5451	0.91	0.677	12594	0.944
RRAGA	-9.06	8	-2.35	0.00934	228	0.736	0.991	17817	1	-3.38	8	-0.96	0.17	2201	0.91	0.83	15844	0.945
MRPL21	-9.06	8	-2.35	0.00934	229	0.736	0.991	17816	1	0.51	8	0.28	0.61	12078	0.91	0.39	5967	0.944
CDC25A	-9.05	8	-2.35	0.0094	230	0.737	0.991	17815	1	-6.94	8	-2.08	0.0186	145	0.91	0.981	17900	0.989
LRPPRC	-9.05	8	-2.35	0.00943	231	0.737	0.991	17814	1	-2.61	8	-0.71	0.239	3547	0.91	0.761	14498	0.944
AMOT	-9.04	8	-2.35	0.00951	232	0.739	0.99	17813	1	-3.66	8	-1.04	0.148	1850	0.91	0.852	16195	0.949
CDON	-9.02	8	-2.34	0.00963	233	0.746	0.99	17812	1	-4.46	8	-1.3	0.0971	1029	0.91	0.903	17016	0.957
NARS2	-9	8	-2.34	0.00974	234	0.751	0.99	17811	1	-1.03	8	-0.21	0.418	7616	0.91	0.582	10429	0.944
GADD45GIP1	-9	8	-2.33	0.00979	235	0.752	0.99	17810	1	-2.39	8	-0.64	0.261	4054	0.91	0.739	13991	0.944
BCL2L1	-8.98	8	-2.33	0.00987	236	0.755	0.99	17809	1	-11.27	8	-3.46	0.000273	16	0.307	1	18029	1
SYTL1	-8.96	8	-2.32	0.0101	237	0.763	0.99	17808	1	-4.07	8	-1.17	0.121	1384	0.91	0.879	16661	0.952
TMPRSS5	-8.96	8	-2.32	0.0101	238	0.763	0.99	17807	1	-3.62	8	-1.03	0.151	1909	0.91	0.849	16136	0.949
GEMIN4	-8.95	8	-2.32	0.0101	239	0.763	0.99	17806	1	-3.35	8	-0.94	0.173	2247	0.91	0.827	15798	0.945
BCAP31	-8.95	8	-2.32	0.0101	240	0.763	0.99	17805	1	1.34	8	0.54	0.706	13928	0.915	0.294	4117	0.944
RNF183	-8.93	8	-2.32	0.0103	241	0.769	0.99	17804	1	-3.01	8	-0.84	0.201	2801	0.91	0.799	15244	0.944
HOXD1	-8.91	8	-2.31	0.0104	242	0.777	0.99	17803	1	-5.69	8	-1.69	0.0459	404	0.91	0.954	17641	0.976
LSS	-8.9	8	-2.31	0.0105	243	0.778	0.99	17802	1	-1.77	8	-0.44	0.329	5559	0.91	0.671	12486	0.944
NDUFS7	-8.84	8	-2.29	0.0109	244	0.808	0.989	17801	1	-3.82	8	-1.09	0.137	1656	0.91	0.863	16389	0.95
MTMR6	-8.83	8	-2.29	0.011	245	0.809	0.989	17800	1	-4.33	8	-1.26	0.105	1142	0.91	0.895	16903	0.956
C9orf163	-8.82	8	-2.29	0.0111	246	0.816	0.989	17799	1	-4.27	8	-1.24	0.108	1188	0.91	0.892	16857	0.955
GTPBP8	-8.81	8	-2.28	0.0112	247	0.816	0.989	17798	1	-3.57	8	-1.02	0.155	1969	0.91	0.845	16076	0.948
USP21	-8.8	8	-2.28	0.0112	248	0.817	0.989	17797	1	1.61	8	0.63	0.735	14410	0.92	0.265	3635	0.944
SDHAF1	-8.77	8	-2.27	0.0115	249	0.834	0.988	17796	1	-2.96	8	-0.82	0.206	2900	0.91	0.794	15145	0.944
RP2	-8.75	8	-2.27	0.0117	250	0.839	0.988	17795	1	1.32	8	0.54	0.705	13891	0.915	0.295	4154	0.944
MRPS23	-8.74	8	-2.27	0.0117	251	0.839	0.988	17794	1	0.19	8	0.18	0.57	11215	0.91	0.43	6830	0.944
SNRNP70	-8.74	8	-2.27	0.0117	252	0.839	0.988	17793	1	-0.96	7	-0.21	0.417	7609	0.91	0.583	10436	0.944
TMEM43	-8.73	8	-2.26	0.0118	253	0.841	0.988	17792	1	-3.71	8	-1.06	0.145	1801	0.91	0.855	16244	0.949
TMOD3	-8.72	8	-2.26	0.0119	254	0.841	0.988	17791	1	-5.91	8	-1.76	0.0395	340	0.91	0.961	17705	0.979
PBDC1	-8.72	8	-2.26	0.0119	255	0.841	0.988	17790	1	-1.52	8	-0.36	0.358	6216	0.91	0.642	11829	0.944
DUSP1	-8.66	8	-2.24	0.0124	256	0.873	0.988	17789	1	-1.29	8	-0.29	0.385	6858	0.91	0.615	11187	0.944
METTL17	-8.65	8	-2.24	0.0125	257	0.877	0.988	17788	1	-3.32	8	-0.94	0.175	2285	0.91	0.825	15760	0.945
METTL27	-8.64	8	-2.24	0.0126	258	0.881	0.987	17787	1	-2.87	8	-0.79	0.214	3063	0.91	0.786	14982	0.944
CORT	-6.08	4	-2.23	0.013	259	0.904	0.987	17786	1	-0.5	4	-0.11	0.457	8574	0.91	0.543	9471	0.944
CFAP47	-8.56	8	-2.22	0.0133	260	0.92	0.987	17785	1	-3.23	8	-0.91	0.182	2427	0.91	0.818	15618	0.945
TASP1	-8.53	8	-2.21	0.0136	261	0.939	0.986	17784	1	4.21	8	1.45	0.927	17125	0.976	0.0734	920	0.944
PARP16	-8.51	8	-2.2	0.0138	262	0.939	0.986	17783	1	-6.16	8	-1.83	0.0333	286	0.91	0.967	17759	0.982
MRPL12	-8.5	8	-2.2	0.0138	263	0.939	0.986	17782	1	-4.32	8	-1.25	0.105	1145	0.91	0.895	16900	0.956
STRN3	-8.49	8	-2.2	0.0139	264	0.939	0.986	17781	1	0.94	8	0.42	0.661	13096	0.91	0.339	4949	0.944
JUND	-8.49	8	-2.2	0.014	265	0.939	0.986	17780	1	-6.04	8	-1.8	0.0361	307	0.91	0.964	17738	0.981
MRPS18A	-8.49	8	-2.2	0.014	266	0.939	0.986	17779	1	-1.44	8	-0.34	0.367	6424	0.91	0.633	11621	0.944
LAMTOR5	-8.47	8	-2.19	0.0141	267	0.939	0.986	17778	1	-1.22	8	-0.27	0.394	7047	0.91	0.606	10998	0.944
RHOG	-8.46	8	-2.19	0.0142	268	0.939	0.986	17777	1	-13.41	8	-4.13	1.79e-05	9	0.0358	1	18036	1
SLC12A9	-8.46	8	-2.19	0.0142	269	0.939	0.986	17776	1	-0.33	8	0.01	0.505	9664	0.91	0.495	8381	0.944
HPS6	-8.45	8	-2.19	0.0143	270	0.939	0.986	17775	1	-3.99	8	-1.15	0.126	1459	0.91	0.874	16586	0.951
TTYH2	-8.44	8	-2.19	0.0144	271	0.939	0.986	17774	1	-3.28	8	-0.92	0.178	2352	0.91	0.822	15693	0.945
WARS2	-8.43	8	-2.18	0.0145	272	0.939	0.985	17773	1	0.11	8	0.15	0.56	10983	0.91	0.44	7062	0.944
UROS	-8.42	8	-2.18	0.0146	273	0.939	0.985	17772	1	-3.15	8	-0.88	0.189	2564	0.91	0.811	15481	0.944
MRPS21	-8.42	8	-2.18	0.0146	274	0.939	0.985	17771	1	-3.3	8	-0.93	0.176	2315	0.91	0.824	15730	0.945
VARS2	-8.42	8	-2.18	0.0146	275	0.939	0.985	17770	1	-4.37	8	-1.27	0.103	1109	0.91	0.897	16936	0.956
NLRP1	-8.42	8	-2.18	0.0146	276	0.939	0.985	17769	1	-3.44	8	-0.97	0.165	2129	0.91	0.835	15916	0.947
ERAL1	-8.42	8	-2.18	0.0146	277	0.939	0.985	17768	1	-0.26	8	0.03	0.513	9865	0.91	0.487	8180	0.944
TANK	-8.42	8	-2.18	0.0146	278	0.939	0.985	17767	1	-2.23	8	-0.59	0.278	4443	0.91	0.722	13602	0.944
C9orf16	-8.41	8	-2.18	0.0147	279	0.939	0.985	17766	1	-3.98	8	-1.15	0.126	1468	0.91	0.874	16577	0.951
FGF4	-8.41	8	-2.18	0.0148	280	0.939	0.985	17765	1	-10.31	8	-3.15	0.000816	25	0.569	0.999	18020	1
H3-3B	-5.94	4	-2.18	0.0148	281	0.939	0.985	17764	1	-2.61	4	-1.05	0.146	1818	0.91	0.854	16227	0.949
NDUFAF8	-8.4	8	-2.17	0.0148	282	0.939	0.985	17763	1	-1.81	8	-0.46	0.324	5465	0.91	0.676	12580	0.944
NDUFAF5	-8.35	8	-2.16	0.0153	283	0.939	0.985	17762	1	-2.32	8	-0.62	0.268	4182	0.91	0.732	13863	0.944
TFB2M	-8.34	8	-2.16	0.0154	284	0.939	0.985	17761	1	-0.04	8	0.11	0.542	10563	0.91	0.458	7482	0.944
FOXK1	-8.33	8	-2.16	0.0155	285	0.939	0.984	17760	1	-4.82	8	-1.41	0.0791	787	0.91	0.921	17258	0.963
NDUFB1	-7.21	6	-2.16	0.0156	286	0.939	0.984	17759	1	-4.32	6	-1.46	0.0717	689	0.91	0.928	17356	0.965
EIF1	-5.89	4	-2.16	0.0156	287	0.939	0.984	17758	1	9.34	4	4.3	1	17971	1	8.38e-06	74	0.00204
SURF1	-8.27	8	-2.14	0.0162	288	0.939	0.984	17757	1	-4.59	8	-1.34	0.0906	948	0.91	0.909	17097	0.96
OTUD3	-8.26	8	-2.14	0.0162	289	0.939	0.984	17756	1	-4.79	8	-1.4	0.0807	801	0.91	0.919	17244	0.962
ADNP	-8.26	8	-2.14	0.0163	290	0.939	0.984	17755	1	-3.09	8	-0.86	0.194	2659	0.91	0.806	15386	0.944
PPAT	-8.25	8	-2.13	0.0164	291	0.939	0.984	17754	1	-1.69	8	-0.42	0.338	5773	0.91	0.662	12272	0.944
GTF2H5	-8.25	8	-2.13	0.0164	292	0.939	0.984	17753	1	-3.77	8	-1.08	0.141	1717	0.91	0.859	16328	0.95
SLC35F6	-8.22	8	-2.13	0.0167	293	0.939	0.983	17752	0.999	-0.16	8	0.07	0.526	10173	0.91	0.474	7872	0.944
HMMR	-8.21	8	-2.12	0.0168	294	0.939	0.983	17751	0.999	-3.92	8	-1.13	0.13	1542	0.91	0.87	16503	0.951
ANKS3	-8.21	8	-2.12	0.0168	295	0.939	0.983	17750	0.999	-3.49	8	-0.99	0.161	2056	0.91	0.839	15989	0.947
THAP3	-8.2	8	-2.12	0.0169	296	0.939	0.983	17749	0.999	-3.43	8	-0.97	0.166	2141	0.91	0.834	15904	0.946
NFKB2	-8.18	8	-2.12	0.0172	297	0.939	0.983	17748	0.999	-2.97	8	-0.82	0.205	2876	0.91	0.795	15169	0.944
ATF7IP	-8.17	8	-2.11	0.0172	298	0.939	0.983	17747	0.999	-2.79	8	-0.77	0.222	3206	0.91	0.778	14839	0.944
DGKI	-8.17	8	-2.11	0.0173	299	0.939	0.983	17746	0.999	-0.82	8	-0.14	0.444	8237	0.91	0.556	9808	0.944
H2AZ2	-8.17	8	-2.11	0.0173	300	0.939	0.983	17745	0.999	-6.72	8	-2.01	0.0221	180	0.91	0.978	17865	0.988
TIMM10B	-8.15	8	-2.11	0.0175	301	0.939	0.982	17744	0.999	-5.16	8	-1.52	0.0643	601	0.91	0.936	17444	0.968
HHIP	-8.14	8	-2.11	0.0176	302	0.939	0.982	17743	0.999	-2.91	8	-0.81	0.21	2983	0.91	0.79	15062	0.944
ACP6	-8.14	8	-2.1	0.0177	303	0.939	0.982	17742	0.999	-5.48	8	-1.62	0.0525	487	0.91	0.947	17558	0.974
ZNF148	-8.13	8	-2.1	0.0177	304	0.939	0.982	17741	0.999	-1.4	8	-0.33	0.373	6552	0.91	0.627	11493	0.944
NPTX2	-8.13	8	-2.1	0.0177	305	0.939	0.982	17740	0.999	-0.91	8	-0.17	0.433	7962	0.91	0.567	10083	0.944
ISCA1	-4.06	2	-2.1	0.0178	306	0.939	0.982	17739	0.999	-0.14	2	0.03	0.51	9786	0.91	0.49	8259	0.944
MRPL15	-8.12	8	-2.1	0.0178	307	0.939	0.982	17738	0.999	-1.76	8	-0.44	0.33	5581	0.91	0.67	12464	0.944
SUPT7L	-8.12	8	-2.1	0.0178	308	0.939	0.982	17737	0.999	3.69	8	1.29	0.901	16859	0.965	0.0987	1186	0.944
ARHGEF11	-8.12	8	-2.1	0.0179	309	0.939	0.982	17736	0.999	-1.91	8	-0.49	0.313	5192	0.91	0.687	12853	0.944
CEP85L	-8.1	8	-2.09	0.0181	310	0.939	0.982	17735	0.999	-2.3	8	-0.61	0.27	4232	0.91	0.73	13813	0.944
TOP3B	-8.1	8	-2.09	0.0181	311	0.939	0.982	17734	0.999	-4.02	8	-1.16	0.124	1418	0.91	0.876	16627	0.951
TIMM17A	-8.09	8	-2.09	0.0182	312	0.939	0.982	17733	0.999	-5.63	8	-1.67	0.0476	430	0.91	0.952	17615	0.976
PPP2R3C	-8.08	8	-2.09	0.0183	313	0.939	0.982	17732	0.999	-6.61	8	-1.98	0.024	200	0.91	0.976	17845	0.987
CCHCR1	-8.08	8	-2.09	0.0183	314	0.939	0.982	17731	0.999	-5.27	8	-1.55	0.0602	566	0.91	0.94	17479	0.97
MIB2	-8.08	8	-2.09	0.0184	315	0.939	0.982	17730	0.999	1.46	8	0.58	0.719	14130	0.918	0.281	3915	0.944
LACTB2	-8.07	8	-2.09	0.0184	316	0.939	0.982	17729	0.999	-4.18	8	-1.21	0.114	1263	0.91	0.886	16782	0.953
TOMM40	-7.55	7	-2.09	0.0185	317	0.939	0.982	17728	0.999	-1.64	7	-0.44	0.33	5594	0.91	0.67	12451	0.944
SECTM1	-8.05	8	-2.08	0.0187	318	0.939	0.981	17727	0.999	-2.85	8	-0.79	0.216	3098	0.91	0.784	14947	0.944
ADRM1	-8.04	8	-2.08	0.0188	319	0.939	0.981	17726	0.999	-1.65	8	-0.41	0.343	5881	0.91	0.657	12164	0.944
CSRNP1	-8.04	8	-2.08	0.0189	320	0.939	0.981	17725	0.999	-3.9	8	-1.12	0.131	1563	0.91	0.869	16482	0.951
TMEM179B	-8.04	8	-2.08	0.0189	321	0.939	0.981	17724	0.999	-1.76	8	-0.44	0.33	5593	0.91	0.67	12452	0.944
NDUFC1	-8.01	8	-2.07	0.0192	322	0.939	0.981	17723	0.999	-1.41	8	-0.33	0.371	6526	0.91	0.629	11519	0.944
MARCHF1	-8.01	8	-2.07	0.0192	323	0.939	0.981	17722	0.999	0.92	8	0.41	0.659	13053	0.91	0.341	4992	0.944
AP1M1	-8	8	-2.07	0.0193	324	0.939	0.981	17721	0.999	-2.85	8	-0.79	0.216	3100	0.91	0.784	14945	0.944
MRPS26	-8	8	-2.07	0.0193	325	0.939	0.981	17720	0.999	0.29	8	0.21	0.584	11479	0.91	0.416	6566	0.944
TMEM232	-7.99	8	-2.07	0.0194	326	0.939	0.981	17719	0.999	-4.23	8	-1.22	0.11	1218	0.91	0.89	16827	0.954
NDUFA5	-7.99	8	-2.07	0.0195	327	0.939	0.981	17718	0.999	-4.13	8	-1.19	0.117	1309	0.91	0.883	16736	0.952
EFNA3	-7.99	8	-2.06	0.0195	328	0.939	0.981	17717	0.999	-4.72	8	-1.38	0.0837	847	0.91	0.916	17198	0.961
CAVIN1	-7.97	8	-2.06	0.0197	329	0.939	0.98	17716	0.998	-1.67	8	-0.41	0.341	5842	0.91	0.659	12203	0.944
CYLD	-7.97	8	-2.06	0.0198	330	0.939	0.98	17715	0.998	5.11	8	1.74	0.959	17386	0.995	0.0412	659	0.944
GLMN	-7.96	8	-2.06	0.0198	331	0.939	0.98	17714	0.998	7.24	8	2.41	0.992	17744	1	0.00788	301	0.471
SCN5A	-7.96	8	-2.06	0.0198	332	0.939	0.98	17713	0.998	-5.05	8	-1.48	0.0691	665	0.91	0.931	17380	0.966
MT1HL1	-5.63	4	-2.06	0.0199	333	0.939	0.98	17712	0.998	-1.2	4	-0.42	0.337	5746	0.91	0.663	12299	0.944
E2F3	-7.95	8	-2.06	0.0199	334	0.939	0.98	17711	0.998	-0.94	8	-0.18	0.428	7847	0.91	0.572	10198	0.944
HSPB1	-7.95	8	-2.05	0.02	335	0.939	0.98	17710	0.998	-8.02	8	-2.42	0.00766	69	0.91	0.992	17976	0.996
KLF4	-7.93	8	-2.05	0.0202	336	0.939	0.98	17709	0.998	-4.95	8	-1.45	0.0734	713	0.91	0.927	17332	0.965
MRPS35	-7.91	8	-2.04	0.0204	337	0.939	0.98	17708	0.998	-4.75	8	-1.39	0.0825	825	0.91	0.917	17220	0.961
TUFM	-7.91	8	-2.04	0.0205	338	0.939	0.98	17707	0.998	-2.19	8	-0.58	0.281	4532	0.91	0.719	13513	0.944
TRUB2	-7.9	8	-2.04	0.0207	339	0.939	0.979	17706	0.998	-4	8	-1.15	0.125	1446	0.91	0.875	16599	0.951
YBX1	-6.84	6	-2.04	0.0207	340	0.939	0.979	17705	0.998	-0.74	6	-0.15	0.439	8113	0.91	0.561	9932	0.944
NSUN4	-7.89	8	-2.04	0.0207	341	0.939	0.979	17704	0.998	0.48	8	0.27	0.606	11985	0.91	0.394	6060	0.944
PYGO2	-7.87	8	-2.03	0.021	342	0.939	0.979	17703	0.998	-1.34	8	-0.31	0.379	6716	0.91	0.621	11329	0.944
GTPBP10	-7.85	8	-2.03	0.0213	343	0.939	0.979	17702	0.998	-2.12	8	-0.55	0.29	4697	0.91	0.71	13348	0.944
PRMT8	-7.83	8	-2.02	0.0215	344	0.939	0.978	17701	0.997	-3.36	8	-0.95	0.171	2226	0.91	0.829	15819	0.945
ITGB1	-7.83	8	-2.02	0.0216	345	0.939	0.978	17700	0.997	0.58	8	0.3	0.618	12241	0.91	0.382	5804	0.944
DIS3L2	-7.83	8	-2.02	0.0216	346	0.939	0.978	17699	0.997	-6.9	8	-2.07	0.0192	150	0.91	0.981	17895	0.989
SKP2	-7.8	8	-2.01	0.022	347	0.939	0.978	17698	0.997	-2.74	8	-0.75	0.226	3295	0.91	0.774	14750	0.944
MRPS10	-7.8	8	-2.01	0.022	348	0.939	0.978	17697	0.997	-0.84	8	-0.15	0.441	8179	0.91	0.559	9866	0.944
TRERF1	-7.8	8	-2.01	0.022	349	0.939	0.978	17696	0.997	-2.53	8	-0.69	0.247	3724	0.91	0.753	14321	0.944
MRPS9	-7.79	8	-2.01	0.0221	350	0.939	0.978	17695	0.997	-4.12	8	-1.19	0.117	1325	0.91	0.883	16720	0.952
NUDT19	-7.79	8	-2.01	0.0222	351	0.939	0.978	17694	0.997	-5.83	8	-1.73	0.0416	364	0.91	0.958	17681	0.978
MOB2	-7.78	8	-2.01	0.0222	352	0.939	0.978	17693	0.997	-3.44	8	-0.97	0.165	2126	0.91	0.835	15919	0.947
DLGAP5	-7.78	8	-2.01	0.0223	353	0.939	0.978	17692	0.997	-0.92	8	-0.17	0.431	7936	0.91	0.569	10109	0.944
KDM4D	-7.77	8	-2.01	0.0223	354	0.939	0.978	17691	0.997	-3.29	8	-0.93	0.177	2335	0.91	0.823	15710	0.945
HCFC1R1	-7.76	8	-2	0.0225	355	0.939	0.978	17690	0.997	-0.59	8	-0.07	0.472	8905	0.91	0.528	9140	0.944
CLEC7A	-7.76	8	-2	0.0226	356	0.939	0.977	17689	0.997	-0.03	8	0.11	0.543	10596	0.91	0.457	7449	0.944
API5	-7.73	8	-2	0.023	357	0.939	0.977	17688	0.997	5.07	8	1.72	0.958	17376	0.995	0.0423	669	0.944
MRPL9	-7.72	8	-1.99	0.0231	358	0.939	0.977	17687	0.997	-4.12	8	-1.19	0.118	1331	0.91	0.882	16714	0.952
PCDHA6	-7.72	8	-1.99	0.0231	359	0.939	0.977	17686	0.997	-2.29	8	-0.61	0.272	4273	0.91	0.728	13772	0.944
PTCD3	-7.72	8	-1.99	0.0232	360	0.939	0.977	17685	0.997	-2.57	8	-0.7	0.243	3635	0.91	0.757	14410	0.944
FOXP1	-7.71	8	-1.99	0.0232	361	0.939	0.977	17684	0.997	-7.55	8	-2.28	0.0114	103	0.91	0.989	17942	0.994
LMAN1L	-7.71	8	-1.99	0.0233	362	0.939	0.977	17683	0.997	-2.21	8	-0.58	0.28	4496	0.91	0.72	13549	0.944
BLOC1S6	-7.71	8	-1.99	0.0233	363	0.939	0.977	17682	0.997	-4.26	8	-1.23	0.109	1197	0.91	0.891	16848	0.955
MXD4	-7.71	8	-1.99	0.0233	364	0.939	0.977	17681	0.997	-1.76	8	-0.44	0.33	5595	0.91	0.67	12450	0.944
TMEM39A	-7.7	8	-1.99	0.0234	365	0.939	0.977	17680	0.997	-0.67	8	-0.09	0.462	8695	0.91	0.538	9350	0.944
CAPN10	-7.7	8	-1.99	0.0234	366	0.939	0.977	17679	0.997	-1.43	8	-0.34	0.369	6466	0.91	0.631	11579	0.944
UNC45A	-7.69	8	-1.99	0.0235	367	0.939	0.977	17678	0.997	-9.2	8	-2.8	0.00257	37	0.91	0.997	18008	0.999
EMC10	-7.69	8	-1.98	0.0236	368	0.939	0.976	17677	0.997	-4.7	8	-1.37	0.0849	863	0.91	0.915	17182	0.961
NUF2	-7.19	7	-1.98	0.0236	369	0.939	0.976	17676	0.997	-2.26	7	-0.65	0.258	3977	0.91	0.742	14068	0.944
RPUSD4	-7.67	8	-1.98	0.0238	370	0.939	0.976	17675	0.997	-0.14	8	0.07	0.529	10251	0.91	0.471	7794	0.944
IL21R	-7.67	8	-1.98	0.0238	371	0.939	0.976	17674	0.997	-1.64	8	-0.4	0.343	5891	0.91	0.657	12154	0.944
WDR11	-7.67	8	-1.98	0.0239	372	0.939	0.976	17673	0.997	-3.88	8	-1.11	0.133	1586	0.91	0.867	16459	0.951
ZC3H7A	-7.67	8	-1.98	0.0239	373	0.939	0.976	17672	0.997	-4.38	8	-1.27	0.102	1099	0.91	0.898	16946	0.956
GDF7	-7.66	8	-1.98	0.0239	374	0.939	0.976	17671	0.997	-4.72	8	-1.38	0.0838	849	0.91	0.916	17196	0.961
SORD	-7.66	8	-1.98	0.024	375	0.939	0.976	17670	0.997	-1.99	8	-0.51	0.304	5006	0.91	0.696	13039	0.944
SETD6	-7.65	8	-1.97	0.0242	376	0.939	0.976	17669	0.997	-5.63	8	-1.67	0.0478	433	0.91	0.952	17612	0.976
CYC1	-7.65	8	-1.97	0.0242	377	0.939	0.976	17668	0.997	-3.75	8	-1.07	0.142	1757	0.91	0.858	16288	0.95
RPL36A	-7.62	8	-1.97	0.0245	378	0.939	0.975	17667	0.996	0.08	8	0.14	0.557	10892	0.91	0.443	7153	0.944
PLPPR1	-7.61	8	-1.96	0.0247	379	0.939	0.975	17666	0.996	-4.68	8	-1.37	0.0861	877	0.91	0.914	17168	0.961
SLC32A1	-7.61	8	-1.96	0.0248	380	0.939	0.975	17665	0.996	-2.88	8	-0.8	0.213	3042	0.91	0.787	15003	0.944
NUDT14	-7.6	8	-1.96	0.0249	381	0.939	0.975	17664	0.996	-2.1	8	-0.55	0.292	4771	0.91	0.708	13274	0.944
LYST	-7.59	8	-1.96	0.0251	382	0.939	0.975	17663	0.996	-2.03	8	-0.53	0.299	4914	0.91	0.701	13131	0.944
ZC3HC1	-7.59	8	-1.96	0.0251	383	0.939	0.975	17662	0.996	-1.97	8	-0.51	0.306	5058	0.91	0.694	12987	0.944
HSP90AA1	-7.58	8	-1.96	0.0253	384	0.939	0.975	17661	0.996	2.7	8	0.97	0.835	16028	0.94	0.165	2017	0.944
PLEKHM1	-7.57	8	-1.95	0.0253	385	0.939	0.975	17660	0.996	-1.35	8	-0.31	0.378	6674	0.91	0.622	11371	0.944
MTMR3	-7.57	8	-1.95	0.0254	386	0.939	0.975	17659	0.996	-5.91	8	-1.76	0.0396	341	0.91	0.96	17704	0.979
TEFM	-7.56	8	-1.95	0.0256	387	0.939	0.974	17658	0.996	-1.18	8	-0.26	0.398	7183	0.91	0.602	10862	0.944
MSANTD2	-7.54	8	-1.95	0.0258	388	0.939	0.974	17657	0.996	-4.33	8	-1.25	0.105	1143	0.91	0.895	16902	0.956
FNIP1	-7.54	8	-1.95	0.0258	389	0.939	0.974	17656	0.996	-6.54	8	-1.96	0.0252	215	0.91	0.975	17830	0.986
MAFK	-7.54	8	-1.95	0.0258	390	0.939	0.974	17655	0.996	-4.46	8	-1.3	0.0972	1032	0.91	0.903	17013	0.957
MRPS18C	-7.54	8	-1.94	0.0259	391	0.939	0.974	17654	0.996	-2.2	8	-0.58	0.281	4512	0.91	0.719	13533	0.944
GFOD2	-7.53	8	-1.94	0.0259	392	0.939	0.974	17653	0.996	-4.6	8	-1.34	0.0899	936	0.91	0.91	17109	0.96
RING1	-7.53	8	-1.94	0.026	393	0.939	0.974	17652	0.996	-7.57	8	-2.28	0.0112	99	0.91	0.989	17946	0.994
LATS2	-7.53	8	-1.94	0.026	394	0.939	0.974	17651	0.996	0.05	8	0.13	0.553	10818	0.91	0.447	7227	0.944
SZT2	-7.52	8	-1.94	0.0261	395	0.939	0.974	17650	0.996	-3.57	8	-1.01	0.155	1974	0.91	0.845	16071	0.948
FAM124B	-7.51	8	-1.94	0.0263	396	0.939	0.974	17649	0.995	-4.12	8	-1.19	0.117	1319	0.91	0.883	16726	0.952
KIF4A	-7.51	8	-1.94	0.0263	397	0.939	0.974	17648	0.995	-5.78	8	-1.71	0.0432	376	0.91	0.957	17669	0.977
NSF	-6.5	6	-1.94	0.0263	398	0.939	0.974	17647	0.995	-2.61	6	-0.84	0.201	2799	0.91	0.799	15246	0.944
FMC1-LUC7L2	-7.51	8	-1.94	0.0263	399	0.939	0.974	17646	0.995	-6.78	8	-2.03	0.021	170	0.91	0.979	17875	0.988
ELOVL4	-7.51	8	-1.94	0.0264	400	0.939	0.974	17645	0.995	-2.59	8	-0.7	0.241	3587	0.91	0.759	14458	0.944
POLR2J	-5.31	4	-1.94	0.0264	401	0.939	0.974	17644	0.995	-4.48	4	-1.89	0.0294	254	0.91	0.971	17791	0.984
HAUS6	-7.51	8	-1.94	0.0264	402	0.939	0.974	17643	0.995	-1.13	8	-0.24	0.405	7319	0.91	0.595	10726	0.944
UBA3	-7.5	8	-1.93	0.0265	403	0.939	0.973	17642	0.995	-1.29	8	-0.29	0.385	6852	0.91	0.615	11193	0.944
LBX2	-7.5	8	-1.93	0.0266	404	0.939	0.973	17641	0.995	-5.26	8	-1.55	0.0606	570	0.91	0.939	17475	0.97
MRPL52	-7.49	8	-1.93	0.0266	405	0.939	0.973	17640	0.995	-3.76	8	-1.07	0.141	1738	0.91	0.859	16307	0.95
RNF223	-7.49	8	-1.93	0.0266	406	0.939	0.973	17639	0.995	-1.44	8	-0.34	0.367	6417	0.91	0.633	11628	0.944
ECEL1	-7.49	8	-1.93	0.0267	407	0.939	0.973	17638	0.995	-7.03	8	-2.11	0.0173	133	0.91	0.983	17912	0.99
TNFRSF18	-7.48	8	-1.93	0.0268	408	0.939	0.973	17637	0.995	-2.3	8	-0.61	0.27	4222	0.91	0.73	13823	0.944
MRPL50	-7.46	8	-1.93	0.0271	409	0.939	0.973	17636	0.995	-1.1	8	-0.23	0.408	7404	0.91	0.592	10641	0.944
MRPL27	-7.46	8	-1.92	0.0273	410	0.939	0.973	17635	0.995	0.39	8	0.24	0.595	11728	0.91	0.405	6317	0.944
TIMM8A	-7.44	8	-1.92	0.0276	411	0.939	0.972	17634	0.995	-2.1	8	-0.55	0.291	4748	0.91	0.709	13297	0.944
MPV17L	-7.43	8	-1.92	0.0277	412	0.939	0.972	17633	0.995	-2.98	8	-0.83	0.204	2845	0.91	0.796	15200	0.944
PSME4	-7.43	8	-1.92	0.0277	413	0.939	0.972	17632	0.995	1.06	8	0.45	0.675	13375	0.91	0.325	4670	0.944
GSTM3	-7.42	8	-1.91	0.0279	414	0.939	0.972	17631	0.995	-1.03	8	-0.21	0.417	7606	0.91	0.583	10439	0.944
MRPS17	-7.42	8	-1.91	0.0279	415	0.939	0.972	17630	0.995	-5.3	8	-1.56	0.0589	553	0.91	0.941	17492	0.971
PFKP	-7.41	8	-1.91	0.0279	416	0.939	0.972	17629	0.995	-2.57	8	-0.7	0.243	3640	0.91	0.757	14405	0.944
CYB561	-7.41	8	-1.91	0.0281	417	0.939	0.972	17628	0.995	-1.05	8	-0.22	0.414	7542	0.91	0.586	10503	0.944
CNOT11	-7.41	8	-1.91	0.0281	418	0.939	0.972	17627	0.995	14.02	8	4.56	1	17988	1	2.51e-06	57	0.000793
NDUFS2	-7.4	8	-1.91	0.0281	419	0.939	0.972	17626	0.995	-1.2	8	-0.26	0.396	7125	0.91	0.604	10920	0.944
NFYC	-6.91	7	-1.9	0.0284	420	0.939	0.972	17625	0.995	-3.37	7	-1.03	0.152	1931	0.91	0.848	16114	0.949
MTX2	-7.38	8	-1.9	0.0285	421	0.939	0.972	17624	0.995	-4.4	8	-1.28	0.101	1082	0.91	0.899	16963	0.957
REEP6	-7.38	8	-1.9	0.0285	422	0.939	0.971	17623	0.995	-2.88	8	-0.79	0.213	3043	0.91	0.787	15002	0.944
UBE3A	-7.37	8	-1.9	0.0286	423	0.939	0.971	17622	0.995	-0.72	8	-0.11	0.456	8537	0.91	0.544	9508	0.944
TOR3A	-7.36	8	-1.9	0.0288	424	0.939	0.971	17621	0.994	-4.82	8	-1.41	0.0789	785	0.91	0.921	17260	0.963
NPEPPS	-7.36	8	-1.9	0.0289	425	0.939	0.971	17620	0.994	1.21	8	0.5	0.691	13680	0.912	0.309	4365	0.944
BOLA3	-7.36	8	-1.9	0.029	426	0.939	0.971	17619	0.994	-5.19	8	-1.53	0.0632	592	0.91	0.937	17453	0.968
HGFAC	-7.33	8	-1.89	0.0294	427	0.939	0.971	17618	0.994	-1.05	8	-0.22	0.415	7554	0.91	0.585	10491	0.944
MC3R	-7.33	8	-1.89	0.0295	428	0.939	0.971	17617	0.994	-8.69	8	-2.64	0.00415	50	0.91	0.996	17995	0.999
FBP2	-7.32	8	-1.89	0.0295	429	0.939	0.97	17616	0.994	-2.95	8	-0.82	0.207	2917	0.91	0.793	15128	0.944
LARGE1	-7.32	8	-1.89	0.0297	430	0.939	0.97	17615	0.994	-4.16	8	-1.2	0.115	1277	0.91	0.885	16768	0.953
MTX1	-7.31	8	-1.88	0.0298	431	0.939	0.97	17614	0.994	-5.66	8	-1.68	0.0468	420	0.91	0.953	17625	0.976
SPARC	-7.31	8	-1.88	0.0298	432	0.939	0.97	17613	0.994	-5.49	8	-1.62	0.0522	481	0.91	0.948	17564	0.974
LAMA3	-7.31	8	-1.88	0.0298	433	0.939	0.97	17612	0.994	-2.63	8	-0.71	0.237	3514	0.91	0.763	14531	0.944
ABHD12	-7.3	8	-1.88	0.0299	434	0.939	0.97	17611	0.994	-3.72	8	-1.06	0.144	1788	0.91	0.856	16257	0.95
SRSF4	-7.3	8	-1.88	0.0299	435	0.939	0.97	17610	0.994	-0.06	8	0.1	0.539	10481	0.91	0.461	7564	0.944
PDSS1	-7.29	8	-1.88	0.0301	436	0.939	0.97	17609	0.994	-1.33	8	-0.31	0.38	6742	0.91	0.62	11303	0.944
STRIP1	-7.29	8	-1.88	0.0301	437	0.939	0.97	17608	0.994	-0.11	8	0.08	0.533	10357	0.91	0.467	7688	0.944
RBBP9	-7.29	8	-1.88	0.0302	438	0.939	0.97	17607	0.994	-4.13	8	-1.19	0.117	1314	0.91	0.883	16731	0.952
DAGLA	-7.29	8	-1.88	0.0302	439	0.939	0.97	17606	0.994	-5.37	8	-1.59	0.0564	527	0.91	0.944	17518	0.972
PPP2R2C	-7.28	8	-1.88	0.0304	440	0.939	0.97	17605	0.994	-2.74	8	-0.75	0.226	3291	0.91	0.774	14754	0.944
HEPACAM	-7.28	8	-1.88	0.0304	441	0.939	0.97	17604	0.994	-2.2	8	-0.58	0.281	4526	0.91	0.719	13519	0.944
NR2F2	-7.27	8	-1.87	0.0305	442	0.939	0.97	17603	0.994	3.01	8	1.07	0.858	16348	0.947	0.142	1697	0.944
FANCE	-7.26	8	-1.87	0.0306	443	0.939	0.969	17602	0.994	1.63	8	0.64	0.738	14462	0.92	0.262	3583	0.944
CBY3	-7.26	8	-1.87	0.0307	444	0.939	0.969	17601	0.994	-0.48	8	-0.04	0.486	9240	0.91	0.514	8805	0.944
ADCY4	-7.25	8	-1.87	0.0309	445	0.939	0.969	17600	0.994	-1.83	8	-0.46	0.322	5400	0.91	0.678	12645	0.944
NPAT	-6.27	6	-1.86	0.0311	446	0.939	0.969	17599	0.993	-0.76	6	-0.16	0.436	8047	0.91	0.564	9998	0.944
SFI1	-7.23	8	-1.86	0.0313	447	0.939	0.969	17598	0.993	-0.84	8	-0.15	0.441	8180	0.91	0.559	9865	0.944
CCDC59	-7.22	8	-1.86	0.0315	448	0.939	0.969	17597	0.993	-1.46	8	-0.34	0.365	6373	0.91	0.635	11672	0.944
GNAI2	-7.21	8	-1.86	0.0316	449	0.939	0.968	17596	0.993	-6.03	8	-1.79	0.0364	311	0.91	0.964	17734	0.98
MRPL13	-7.21	8	-1.86	0.0316	450	0.939	0.968	17595	0.993	-3.28	8	-0.92	0.178	2361	0.91	0.822	15684	0.945
CD164	-7.21	8	-1.86	0.0316	451	0.939	0.968	17594	0.993	-1.12	8	-0.24	0.406	7353	0.91	0.594	10692	0.944
SLC18A3	-7.21	8	-1.86	0.0317	452	0.939	0.968	17593	0.993	-6.84	8	-2.05	0.0202	165	0.91	0.98	17880	0.989
SIKE1	-7.2	8	-1.85	0.0318	453	0.939	0.968	17592	0.993	2.49	8	0.91	0.818	15777	0.935	0.182	2268	0.944
C6orf226	-7.19	8	-1.85	0.032	454	0.939	0.968	17591	0.993	-5.64	8	-1.67	0.0475	428	0.91	0.953	17617	0.976
SMAD3	-7.19	8	-1.85	0.032	455	0.939	0.968	17590	0.993	-4.04	8	-1.16	0.122	1401	0.91	0.878	16644	0.952
TACSTD2	-7.19	8	-1.85	0.032	456	0.939	0.968	17589	0.993	-1.89	8	-0.48	0.315	5258	0.91	0.685	12787	0.944
MTFMT	-7.18	8	-1.85	0.0322	457	0.939	0.968	17588	0.993	-6.45	8	-1.93	0.0269	234	0.91	0.973	17811	0.986
FOXRED1	-7.18	8	-1.85	0.0323	458	0.939	0.968	17587	0.993	-2.87	8	-0.79	0.214	3052	0.91	0.786	14993	0.944
MTG2	-7.17	8	-1.85	0.0323	459	0.939	0.968	17586	0.993	-2.27	8	-0.6	0.273	4310	0.91	0.727	13735	0.944
TRPM4	-7.17	8	-1.85	0.0324	460	0.939	0.968	17585	0.993	-5.79	8	-1.72	0.0428	374	0.91	0.957	17671	0.977
NAA25	-6.21	6	-1.85	0.0324	461	0.939	0.968	17584	0.993	-0.26	6	0.02	0.509	9764	0.91	0.491	8281	0.944
MRPL54	-7.17	8	-1.85	0.0325	462	0.939	0.968	17583	0.993	-1.5	8	-0.36	0.36	6267	0.91	0.64	11778	0.944
TIMMDC1	-7.15	8	-1.84	0.0327	463	0.939	0.967	17582	0.993	-3.54	8	-1.01	0.157	1998	0.91	0.843	16047	0.948
HPDL	-7.14	8	-1.84	0.0329	464	0.939	0.967	17581	0.993	0.43	8	0.25	0.6	11850	0.91	0.4	6195	0.944
PFDN5	-7.14	8	-1.84	0.0329	465	0.939	0.967	17580	0.993	-6.88	8	-2.06	0.0195	153	0.91	0.98	17892	0.989
SLC22A18	-7.14	8	-1.84	0.0329	466	0.939	0.967	17579	0.993	-3.8	8	-1.09	0.138	1679	0.91	0.862	16366	0.95
TOX4	-7.14	8	-1.84	0.0329	467	0.939	0.967	17578	0.993	-2.29	8	-0.61	0.271	4253	0.91	0.729	13792	0.944
PAX6	-7.14	8	-1.84	0.0329	468	0.939	0.967	17577	0.993	-2.27	8	-0.6	0.273	4311	0.91	0.727	13734	0.944
CACNA2D1	-7.14	8	-1.84	0.033	469	0.939	0.967	17576	0.993	-5.94	8	-1.77	0.0386	333	0.91	0.961	17712	0.979
UNC5A	-7.13	8	-1.84	0.0332	470	0.939	0.967	17575	0.993	-2.75	8	-0.75	0.226	3282	0.91	0.774	14763	0.944
MRPL19	-7.11	8	-1.83	0.0336	471	0.939	0.966	17574	0.992	-1.83	8	-0.46	0.322	5392	0.91	0.678	12653	0.944
IQCD	-7.1	8	-1.83	0.0338	472	0.939	0.966	17573	0.992	-1.41	8	-0.33	0.37	6504	0.91	0.63	11541	0.944
ADGRB1	-7.1	8	-1.83	0.0338	473	0.939	0.966	17572	0.992	-4.72	8	-1.38	0.084	854	0.91	0.916	17191	0.961
MRPS6	-7.09	8	-1.82	0.034	474	0.939	0.966	17571	0.992	-1.03	8	-0.21	0.417	7597	0.91	0.583	10448	0.944
FUS	-7.08	8	-1.82	0.0342	475	0.939	0.966	17570	0.992	3.33	8	1.17	0.88	16614	0.955	0.12	1431	0.944
BMP8A	-6.13	6	-1.82	0.0343	476	0.939	0.966	17569	0.992	-5.5	6	-1.9	0.029	250	0.91	0.971	17795	0.985
MAU2	-7.07	8	-1.82	0.0344	477	0.939	0.966	17568	0.992	-1.48	8	-0.35	0.362	6316	0.91	0.638	11729	0.944
NTSR1	-7.07	8	-1.82	0.0344	478	0.939	0.966	17567	0.992	-2.25	8	-0.6	0.276	4362	0.91	0.724	13683	0.944
HCN4	-7.06	8	-1.82	0.0347	479	0.939	0.965	17566	0.992	-2.72	8	-0.75	0.228	3318	0.91	0.772	14727	0.944
GARS1	-7.05	8	-1.82	0.0347	480	0.939	0.965	17565	0.992	-3.97	8	-1.14	0.127	1483	0.91	0.873	16562	0.951
NXF1	-6.1	6	-1.81	0.0348	481	0.939	0.965	17564	0.992	1.57	6	0.69	0.756	14805	0.921	0.244	3240	0.944
PDX1	-7.05	8	-1.81	0.0349	482	0.939	0.965	17563	0.992	-2.11	8	-0.55	0.291	4740	0.91	0.709	13305	0.944
UBE2M	-7.04	8	-1.81	0.035	483	0.939	0.965	17562	0.992	15.17	8	4.93	1	18002	1	4.16e-07	43	0.000174
SPDYE1	-3.52	2	-1.81	0.035	484	0.939	0.965	17561	0.992	-1.81	2	-1.03	0.151	1904	0.91	0.849	16141	0.949
SFRP2	-7.04	8	-1.81	0.0351	485	0.939	0.965	17560	0.992	-1.16	8	-0.25	0.401	7256	0.91	0.599	10789	0.944
SLBP	-6.09	6	-1.81	0.0351	486	0.939	0.965	17559	0.992	-6.65	6	-2.32	0.0102	86	0.91	0.99	17959	0.994
C1orf115	-7.03	8	-1.81	0.0351	487	0.939	0.965	17558	0.992	-2.26	8	-0.6	0.274	4337	0.91	0.726	13708	0.944
HAPLN4	-7.03	8	-1.81	0.0351	488	0.939	0.965	17557	0.992	-3.37	8	-0.95	0.171	2221	0.91	0.829	15824	0.945
MRPL43	-7.03	8	-1.81	0.0351	489	0.939	0.965	17556	0.992	-6.77	8	-2.03	0.0212	171	0.91	0.979	17874	0.988
VWA5B1	-7.03	8	-1.81	0.0352	490	0.939	0.965	17555	0.992	-1.69	8	-0.42	0.338	5777	0.91	0.662	12268	0.944
RPL13A	-4.97	4	-1.81	0.0353	491	0.939	0.965	17554	0.992	-2	4	-0.78	0.218	3132	0.91	0.782	14913	0.944
MRPL33	-7.03	8	-1.81	0.0353	492	0.939	0.965	17553	0.992	-2.38	8	-0.64	0.262	4077	0.91	0.738	13968	0.944
PIP4K2B	-7.02	8	-1.81	0.0355	493	0.939	0.965	17552	0.992	-3.63	8	-1.03	0.15	1892	0.91	0.85	16153	0.949
SMIM9	-7.02	8	-1.81	0.0355	494	0.939	0.964	17551	0.992	-3.68	8	-1.05	0.147	1832	0.91	0.853	16213	0.949
NOTCH4	-7.01	8	-1.8	0.0356	495	0.939	0.964	17550	0.992	-1.82	8	-0.46	0.323	5446	0.91	0.677	12599	0.944
TNFAIP8L1	-7.01	8	-1.8	0.0356	496	0.939	0.964	17549	0.992	-2.78	8	-0.76	0.223	3224	0.91	0.777	14821	0.944
HEXIM2	-7.01	8	-1.8	0.0357	497	0.939	0.964	17548	0.992	-3.98	8	-1.14	0.127	1478	0.91	0.873	16567	0.951
GRSF1	-7.01	8	-1.8	0.0357	498	0.939	0.964	17547	0.992	-2.04	8	-0.53	0.298	4896	0.91	0.702	13149	0.944
MRPL46	-7.01	8	-1.8	0.0357	499	0.939	0.964	17546	0.992	-1.81	8	-0.46	0.324	5458	0.91	0.676	12587	0.944
SIGIRR	-7	8	-1.8	0.0357	500	0.939	0.964	17545	0.992	-1.98	8	-0.51	0.305	5029	0.91	0.695	13016	0.944
NHS	-7	8	-1.8	0.0359	501	0.939	0.964	17544	0.992	-3.86	8	-1.11	0.134	1608	0.91	0.866	16437	0.95
JAGN1	-6.99	8	-1.8	0.036	502	0.939	0.964	17543	0.991	-4.02	8	-1.16	0.124	1424	0.91	0.876	16621	0.951
SLC6A18	-6.99	8	-1.8	0.0361	503	0.939	0.964	17542	0.991	-5.28	8	-1.56	0.0599	564	0.91	0.94	17481	0.97
SPATA33	-6.99	8	-1.8	0.0361	504	0.939	0.964	17541	0.991	-2.22	8	-0.59	0.279	4473	0.91	0.721	13572	0.944
THOC5	-6.99	8	-1.8	0.0361	505	0.939	0.964	17540	0.991	1.28	8	0.52	0.699	13811	0.913	0.301	4234	0.944
MRPS5	-6.97	8	-1.79	0.0364	506	0.939	0.964	17539	0.991	-2.54	8	-0.69	0.245	3692	0.91	0.755	14353	0.944
GLRX5	-6.97	8	-1.79	0.0364	507	0.939	0.964	17538	0.991	-1.87	8	-0.48	0.317	5302	0.91	0.683	12743	0.944
TMEM190	-6.96	8	-1.79	0.0366	508	0.939	0.963	17537	0.991	-4.35	8	-1.26	0.103	1117	0.91	0.897	16928	0.956
MRPS24	-6.95	8	-1.79	0.0369	509	0.939	0.963	17536	0.991	2.98	8	1.06	0.856	16325	0.946	0.144	1720	0.944
FAM160B1	-6.95	8	-1.79	0.037	510	0.939	0.963	17535	0.991	-0.17	8	0.06	0.525	10156	0.91	0.475	7889	0.944
WRNIP1	-6.94	8	-1.79	0.0371	511	0.939	0.963	17534	0.991	-1.1	8	-0.23	0.408	7396	0.91	0.592	10649	0.944
SLC43A3	-6.93	8	-1.78	0.0373	512	0.939	0.963	17533	0.991	-1.36	8	-0.31	0.377	6666	0.91	0.623	11379	0.944
MED23	-6.92	8	-1.78	0.0376	513	0.939	0.962	17532	0.991	-2.2	8	-0.58	0.281	4528	0.91	0.719	13517	0.944
CLEC6A	-6.92	8	-1.78	0.0376	514	0.939	0.962	17531	0.991	-1.48	8	-0.35	0.362	6306	0.91	0.638	11739	0.944
MPP2	-6.92	8	-1.78	0.0377	515	0.939	0.962	17530	0.991	-3.22	8	-0.9	0.183	2442	0.91	0.817	15603	0.945
MSC	-6.91	8	-1.78	0.0377	516	0.939	0.962	17529	0.991	-0.66	8	-0.09	0.464	8724	0.91	0.536	9321	0.944
FKBP1C	-5.98	6	-1.78	0.0378	517	0.939	0.962	17528	0.991	-2.3	6	-0.72	0.234	3444	0.91	0.766	14601	0.944
TRAFD1	-6.91	8	-1.78	0.0378	518	0.939	0.962	17527	0.991	0.08	8	0.14	0.557	10888	0.91	0.443	7157	0.944
NKX2-1	-6.9	8	-1.78	0.0379	519	0.939	0.962	17526	0.991	-4.48	8	-1.3	0.0961	1016	0.91	0.904	17029	0.958
CCDC84	-6.45	7	-1.77	0.038	520	0.939	0.962	17525	0.991	-1.29	7	-0.32	0.374	6585	0.91	0.626	11460	0.944
RBAK-RBAKDN	-6.9	8	-1.77	0.038	521	0.939	0.962	17524	0.991	-3.95	8	-1.13	0.128	1515	0.91	0.872	16530	0.951
SFT2D1	-6.89	8	-1.77	0.0382	522	0.939	0.962	17523	0.99	-4.35	8	-1.26	0.104	1123	0.91	0.896	16922	0.956
MFAP3	-6.89	8	-1.77	0.0383	523	0.939	0.962	17522	0.99	-2.96	8	-0.82	0.206	2888	0.91	0.794	15157	0.944
BAIAP2L1	-6.88	8	-1.77	0.0383	524	0.939	0.962	17521	0.99	-4.62	8	-1.35	0.089	916	0.91	0.911	17129	0.96
CSDC2	-6.88	8	-1.77	0.0385	525	0.939	0.962	17520	0.99	1.33	8	0.54	0.705	13903	0.915	0.295	4142	0.944
OCIAD1	-6.88	8	-1.77	0.0385	526	0.939	0.962	17519	0.99	-0.48	8	-0.03	0.487	9260	0.91	0.513	8785	0.944
FAM9A	-6.88	8	-1.77	0.0385	527	0.939	0.961	17518	0.99	-3.97	8	-1.14	0.127	1493	0.91	0.873	16552	0.951
RGS12	-6.87	8	-1.77	0.0386	528	0.939	0.961	17517	0.99	1.66	8	0.64	0.74	14503	0.92	0.26	3542	0.944
MYT1	-6.87	8	-1.77	0.0387	529	0.939	0.961	17516	0.99	-3.23	8	-0.91	0.182	2434	0.91	0.818	15611	0.945
JMJD4	-6.87	8	-1.77	0.0388	530	0.939	0.961	17515	0.99	-0.53	8	-0.05	0.48	9101	0.91	0.52	8944	0.944
CCL11	-6.86	8	-1.77	0.0388	531	0.939	0.961	17514	0.99	-4.27	8	-1.24	0.108	1192	0.91	0.892	16853	0.955
MRPL24	-6.85	8	-1.76	0.039	532	0.939	0.961	17513	0.99	-0.76	8	-0.12	0.451	8433	0.91	0.549	9612	0.944
MRPS31	-6.85	8	-1.76	0.039	533	0.939	0.961	17512	0.99	-2.54	8	-0.69	0.246	3707	0.91	0.754	14338	0.944
NDUFB2	-6.85	8	-1.76	0.039	534	0.939	0.961	17511	0.99	-3.56	8	-1.01	0.156	1983	0.91	0.844	16062	0.948
UQCC3	-6.85	8	-1.76	0.0391	535	0.939	0.961	17510	0.99	-3.77	8	-1.08	0.141	1724	0.91	0.859	16321	0.95
OR52M1	-6.85	8	-1.76	0.0391	536	0.939	0.961	17509	0.99	-4.82	8	-1.41	0.0794	791	0.91	0.921	17254	0.963
SSBP1	-6.85	8	-1.76	0.0392	537	0.939	0.961	17508	0.99	-1.05	8	-0.22	0.415	7557	0.91	0.585	10488	0.944
SPATC1	-6.85	8	-1.76	0.0392	538	0.939	0.961	17507	0.99	-0.28	8	0.03	0.512	9813	0.91	0.488	8232	0.944
C1QBP	-6.84	8	-1.76	0.0393	539	0.939	0.961	17506	0.99	1.76	8	0.68	0.751	14704	0.921	0.249	3341	0.944
BUB1B	-6.84	8	-1.76	0.0393	540	0.939	0.961	17505	0.99	-5.06	8	-1.49	0.0685	652	0.91	0.932	17393	0.966
SNIP1	-6.83	8	-1.76	0.0395	541	0.939	0.961	17504	0.99	-5.16	8	-1.52	0.0643	602	0.91	0.936	17443	0.968
MAN2B2	-6.83	8	-1.76	0.0395	542	0.939	0.96	17503	0.99	1.43	8	0.57	0.716	14086	0.917	0.284	3959	0.944
SENP2	-6.83	8	-1.76	0.0396	543	0.939	0.96	17502	0.99	-9.95	8	-3.04	0.0012	29	0.744	0.999	18016	1
LAMTOR3	-6.82	8	-1.75	0.0397	544	0.939	0.96	17501	0.99	-2.23	8	-0.59	0.278	4441	0.91	0.722	13604	0.944
ZFHX3	-6.82	8	-1.75	0.0398	545	0.939	0.96	17500	0.99	-2.78	8	-0.76	0.222	3216	0.91	0.778	14829	0.944
PLK5	-6.82	8	-1.75	0.0398	546	0.939	0.96	17499	0.99	-6.42	8	-1.92	0.0275	239	0.91	0.973	17806	0.986
VWC2L	-6.82	8	-1.75	0.0398	547	0.939	0.96	17498	0.99	-2.41	8	-0.65	0.259	4012	0.91	0.741	14033	0.944
DARS2	-6.82	8	-1.75	0.0399	548	0.939	0.96	17497	0.99	-1.39	8	-0.32	0.373	6565	0.91	0.627	11480	0.944
MT4	-5.9	6	-1.75	0.0399	549	0.939	0.96	17496	0.99	-1.25	6	-0.34	0.367	6410	0.91	0.633	11635	0.944
AFAP1L1	-6.81	8	-1.75	0.04	550	0.939	0.96	17495	0.99	0.01	8	0.12	0.548	10706	0.91	0.452	7339	0.944
RAB26	-6.81	8	-1.75	0.0401	551	0.939	0.96	17494	0.99	-4.73	8	-1.38	0.0836	845	0.91	0.916	17200	0.961
ATXN7	-6.8	8	-1.75	0.0402	552	0.939	0.96	17493	0.99	2.26	8	0.83	0.798	15475	0.93	0.202	2570	0.944
RAB11B	-6.8	8	-1.75	0.0403	553	0.939	0.96	17492	0.99	-5.37	8	-1.59	0.0565	529	0.91	0.944	17516	0.972
SYT13	-6.79	8	-1.74	0.0405	554	0.939	0.959	17491	0.99	-3.63	8	-1.03	0.151	1897	0.91	0.849	16148	0.949
MBD1	-6.79	8	-1.74	0.0405	555	0.939	0.959	17490	0.99	-1.47	8	-0.35	0.363	6346	0.91	0.637	11699	0.944
SPINK5	-6.77	8	-1.74	0.0409	556	0.939	0.959	17489	0.99	-4	8	-1.15	0.125	1445	0.91	0.875	16600	0.951
KLK4	-6.76	8	-1.74	0.0411	557	0.939	0.959	17488	0.989	-4.54	8	-1.32	0.093	982	0.91	0.907	17063	0.959
FAM163B	-6.76	8	-1.74	0.0411	558	0.939	0.959	17487	0.989	-3.19	8	-0.89	0.186	2501	0.91	0.814	15544	0.945
PAQR4	-6.76	8	-1.74	0.0412	559	0.939	0.959	17486	0.989	-1.63	8	-0.4	0.345	5927	0.91	0.655	12118	0.944
ZSWIM8	-6.74	8	-1.73	0.0416	560	0.939	0.958	17485	0.989	-2.38	8	-0.64	0.262	4078	0.91	0.738	13967	0.944
LYL1	-6.72	8	-1.73	0.042	561	0.939	0.958	17484	0.989	-1.28	8	-0.29	0.387	6902	0.91	0.613	11143	0.944
IQCF1	-6.72	8	-1.73	0.042	562	0.939	0.958	17483	0.989	-2.28	8	-0.61	0.272	4286	0.91	0.728	13759	0.944
MED24	-6.72	8	-1.73	0.0421	563	0.939	0.958	17482	0.989	1.08	8	0.46	0.677	13417	0.91	0.323	4628	0.944
TCTEX1D2	-6.72	8	-1.73	0.0421	564	0.939	0.958	17481	0.989	-2.62	8	-0.71	0.238	3525	0.91	0.762	14520	0.944
TAT	-6.72	8	-1.73	0.0421	565	0.939	0.958	17480	0.989	-4.16	8	-1.2	0.115	1281	0.91	0.885	16764	0.953
MRPL39	-6.72	8	-1.73	0.0422	566	0.939	0.958	17479	0.989	-1.33	8	-0.3	0.381	6747	0.91	0.619	11298	0.944
HEXA	-6.72	8	-1.73	0.0422	567	0.939	0.958	17478	0.989	-0.74	8	-0.12	0.453	8465	0.91	0.547	9580	0.944
BBC3	-6.72	8	-1.73	0.0422	568	0.939	0.958	17477	0.989	-2.95	8	-0.82	0.206	2909	0.91	0.794	15136	0.944
SLC35E1	-6.72	8	-1.73	0.0422	569	0.939	0.958	17476	0.989	-4.72	8	-1.38	0.0838	848	0.91	0.916	17197	0.961
GON7	-6.71	8	-1.72	0.0423	570	0.939	0.958	17475	0.989	-0.46	8	-0.03	0.489	9314	0.91	0.511	8731	0.944
SPAG17	-6.7	8	-1.72	0.0426	571	0.939	0.957	17474	0.989	-4.71	8	-1.37	0.0846	861	0.91	0.915	17184	0.961
POLRMT	-6.7	8	-1.72	0.0427	572	0.939	0.957	17473	0.989	0.6	8	0.31	0.621	12309	0.91	0.379	5736	0.944
ESYT3	-6.69	8	-1.72	0.0428	573	0.939	0.957	17472	0.989	-1.16	8	-0.25	0.401	7250	0.91	0.599	10795	0.944
CBX3	-4.73	4	-1.72	0.0429	574	0.939	0.957	17471	0.988	-1.3	4	-0.46	0.321	5381	0.91	0.679	12664	0.944
KRT5	-6.69	8	-1.72	0.043	575	0.939	0.957	17470	0.988	-2.83	8	-0.78	0.218	3128	0.91	0.782	14917	0.944
VTI1B	-6.68	8	-1.72	0.0431	576	0.939	0.957	17469	0.988	-3.7	8	-1.06	0.145	1805	0.91	0.855	16240	0.949
DNTTIP1	-6.68	8	-1.72	0.0431	577	0.939	0.957	17468	0.988	-4.34	8	-1.26	0.104	1131	0.91	0.896	16914	0.956
DNASE2	-6.68	8	-1.72	0.0432	578	0.939	0.957	17467	0.988	-5.05	8	-1.48	0.0689	660	0.91	0.931	17385	0.966
EPC1	-6.68	8	-1.71	0.0432	579	0.939	0.957	17466	0.988	-3.46	8	-0.98	0.164	2111	0.91	0.836	15934	0.947
PARS2	-6.68	8	-1.71	0.0432	580	0.939	0.957	17465	0.988	-0.36	8	0	0.501	9562	0.91	0.499	8483	0.944
ORC1	-6.24	7	-1.71	0.0434	581	0.939	0.957	17464	0.988	-2.38	7	-0.69	0.245	3685	0.91	0.755	14360	0.944
FLNC	-6.66	8	-1.71	0.0436	582	0.939	0.956	17463	0.988	-4.78	8	-1.4	0.081	806	0.91	0.919	17239	0.962
NDUFA4	-4.7	4	-1.71	0.0439	583	0.939	0.956	17462	0.988	-2.02	4	-0.79	0.215	3080	0.91	0.785	14965	0.944
CDK12	-6.65	8	-1.71	0.0439	584	0.939	0.956	17461	0.988	-6.03	8	-1.8	0.0362	310	0.91	0.964	17735	0.981
MRPL20	-6.65	8	-1.71	0.0439	585	0.939	0.956	17460	0.988	0.46	8	0.26	0.603	11920	0.91	0.397	6125	0.944
WDFY1	-6.65	8	-1.71	0.0439	586	0.939	0.956	17459	0.988	-3.8	8	-1.09	0.138	1677	0.91	0.862	16368	0.95
PGGHG	-6.64	8	-1.71	0.044	587	0.939	0.956	17458	0.988	-3.24	8	-0.91	0.182	2420	0.91	0.818	15625	0.945
ARID3A	-6.62	8	-1.7	0.0445	588	0.939	0.956	17457	0.988	-1.29	8	-0.29	0.385	6859	0.91	0.615	11186	0.944
TMEM92	-6.62	8	-1.7	0.0445	589	0.939	0.956	17456	0.988	-2.16	8	-0.57	0.285	4612	0.91	0.715	13433	0.944
RAVER1	-6.61	8	-1.7	0.0448	590	0.939	0.955	17455	0.987	-1.66	8	-0.41	0.341	5860	0.91	0.659	12185	0.944
ZNF683	-6.61	8	-1.7	0.0448	591	0.939	0.955	17454	0.987	-2.34	8	-0.63	0.266	4139	0.91	0.734	13906	0.944
ADGRG1	-6.6	8	-1.69	0.0452	592	0.939	0.955	17453	0.987	-0.5	8	-0.04	0.484	9199	0.91	0.516	8846	0.944
DSCAM	-6.6	8	-1.69	0.0452	593	0.939	0.955	17452	0.987	-1.71	8	-0.42	0.336	5731	0.91	0.664	12314	0.944
MTIF2	-6.6	8	-1.69	0.0452	594	0.939	0.955	17451	0.987	-3.16	8	-0.88	0.188	2549	0.91	0.812	15496	0.944
SETD1A	-5.7	6	-1.69	0.0454	595	0.939	0.955	17450	0.987	-0.01	8	0.11	0.545	10634	0.91	0.455	7411	0.944
TSPAN7	-6.59	8	-1.69	0.0455	596	0.939	0.955	17449	0.987	-2.79	8	-0.77	0.221	3200	0.91	0.779	14845	0.944
ARPP19	-6.58	8	-1.69	0.0455	597	0.939	0.954	17448	0.987	-0.43	8	-0.02	0.493	9388	0.91	0.507	8657	0.944
SCGN	-6.57	8	-1.69	0.0458	598	0.939	0.954	17447	0.987	-0.84	8	-0.15	0.441	8174	0.91	0.559	9871	0.944
XG	-6.57	8	-1.69	0.0458	599	0.939	0.954	17446	0.987	-0.68	8	-0.1	0.461	8665	0.91	0.539	9380	0.944
MED8	-6.15	7	-1.69	0.0459	600	0.939	0.954	17445	0.987	-3.68	8	-1.05	0.147	1828	0.91	0.853	16217	0.949
C1orf159	-6.57	8	-1.69	0.0459	601	0.939	0.954	17444	0.987	1.11	8	0.47	0.681	13492	0.91	0.319	4553	0.944
MTERF3	-6.57	8	-1.69	0.0459	602	0.939	0.954	17443	0.987	-0.31	8	0.02	0.508	9733	0.91	0.492	8312	0.944
TMBIM6	-6.57	8	-1.69	0.046	603	0.939	0.954	17442	0.987	-1.76	8	-0.44	0.329	5575	0.91	0.671	12470	0.944
MRPS27	-6.56	8	-1.68	0.046	604	0.939	0.954	17441	0.987	-3.56	8	-1.01	0.156	1981	0.91	0.844	16064	0.948
SIN3B	-6.55	8	-1.68	0.0465	605	0.939	0.954	17440	0.987	-3.59	8	-1.02	0.153	1947	0.91	0.847	16098	0.949
TMEM11	-6.54	8	-1.68	0.0465	606	0.939	0.953	17439	0.987	-4.12	8	-1.19	0.117	1323	0.91	0.883	16722	0.952
NFIC	-6.54	8	-1.68	0.0465	607	0.939	0.953	17438	0.987	-4.04	8	-1.16	0.123	1404	0.91	0.877	16641	0.951
NDUFA7	-6.54	8	-1.68	0.0465	608	0.939	0.953	17437	0.987	-4.57	8	-1.33	0.0914	958	0.91	0.909	17087	0.959
ZMYM1	-6.53	8	-1.68	0.0468	609	0.939	0.953	17436	0.986	-1.72	8	-0.43	0.334	5699	0.91	0.666	12346	0.944
HORMAD1	-6.53	8	-1.68	0.0469	610	0.939	0.953	17435	0.986	-6.12	8	-1.82	0.0341	291	0.91	0.966	17754	0.982
NUP133	-6.11	7	-1.68	0.0469	611	0.939	0.953	17434	0.986	-2.9	7	-0.87	0.193	2645	0.91	0.807	15400	0.944
C11orf45	-6.52	8	-1.67	0.0472	612	0.939	0.953	17433	0.986	-4.91	8	-1.44	0.0751	733	0.91	0.925	17312	0.964
ANKRD53	-6.51	8	-1.67	0.0475	613	0.939	0.953	17432	0.986	-1.56	8	-0.38	0.353	6117	0.91	0.647	11928	0.944
SLC22A6	-6.51	8	-1.67	0.0475	614	0.939	0.953	17431	0.986	-4.39	8	-1.27	0.101	1095	0.91	0.899	16950	0.956
MRPS7	-6.51	8	-1.67	0.0475	615	0.939	0.952	17430	0.986	-4.84	8	-1.42	0.078	772	0.91	0.922	17273	0.963
NOB1	-6.08	7	-1.67	0.0477	616	0.939	0.952	17429	0.986	-2	7	-0.56	0.287	4646	0.91	0.713	13399	0.944
TGFB1	-6.5	8	-1.67	0.0478	617	0.939	0.952	17428	0.986	-2.09	8	-0.54	0.293	4796	0.91	0.707	13249	0.944
TMEM201	-6.5	8	-1.67	0.0478	618	0.939	0.952	17427	0.986	-2.62	8	-0.71	0.238	3533	0.91	0.762	14512	0.944
RTP4	-6.5	8	-1.67	0.0478	619	0.939	0.952	17426	0.986	-3.13	8	-0.88	0.19	2587	0.91	0.81	15458	0.944
HAS1	-6.49	8	-1.67	0.0479	620	0.939	0.952	17425	0.986	-0.97	8	-0.19	0.424	7757	0.91	0.576	10288	0.944
RBP4	-6.49	8	-1.67	0.0479	621	0.939	0.952	17424	0.986	-5.32	8	-1.57	0.0584	548	0.91	0.942	17497	0.971
FAM92A	-6.49	8	-1.66	0.0481	622	0.939	0.952	17423	0.986	-3.03	8	-0.84	0.2	2768	0.91	0.8	15277	0.944
HNRNPUL2	-6.48	8	-1.66	0.0481	623	0.939	0.952	17422	0.986	-3.62	8	-1.03	0.151	1908	0.91	0.849	16137	0.949
AK1	-6.48	8	-1.66	0.0481	624	0.939	0.952	17421	0.986	-5.38	8	-1.59	0.0561	525	0.91	0.944	17520	0.972
SUMO3	-6.48	8	-1.66	0.0482	625	0.939	0.952	17420	0.986	-5.67	8	-1.68	0.0465	412	0.91	0.954	17633	0.976
PHKG2	-6.48	8	-1.66	0.0482	626	0.939	0.952	17419	0.986	-0.95	8	-0.18	0.427	7821	0.91	0.573	10224	0.944
TBX10	-6.48	8	-1.66	0.0483	627	0.939	0.952	17418	0.986	-4.46	8	-1.3	0.0972	1031	0.91	0.903	17014	0.957
CEP112	-6.48	8	-1.66	0.0484	628	0.939	0.952	17417	0.986	-4.93	8	-1.45	0.0742	722	0.91	0.926	17323	0.964
CISD3	-6.47	8	-1.66	0.0484	629	0.939	0.952	17416	0.986	-3.78	8	-1.08	0.14	1705	0.91	0.86	16340	0.95
ZBTB45	-6.47	8	-1.66	0.0484	630	0.939	0.952	17415	0.986	1.97	8	0.74	0.771	15046	0.925	0.229	2999	0.944
EIF2B3	-6.06	7	-1.66	0.0484	631	0.939	0.952	17414	0.986	0.36	6	0.25	0.599	11832	0.91	0.401	6213	0.944
IL18BP	-6.47	8	-1.66	0.0485	632	0.939	0.952	17413	0.986	-7.48	8	-2.25	0.0121	108	0.91	0.988	17937	0.994
ATP1B2	-6.47	8	-1.66	0.0486	633	0.939	0.951	17412	0.986	-1.35	8	-0.31	0.378	6680	0.91	0.622	11365	0.944
SPI1	-6.47	8	-1.66	0.0486	634	0.939	0.951	17411	0.986	-4.57	8	-1.33	0.0914	957	0.91	0.909	17088	0.959
RBM27	-6.46	8	-1.66	0.0488	635	0.939	0.951	17410	0.986	3.07	8	1.09	0.862	16402	0.949	0.138	1643	0.944
MRPL51	-6.45	8	-1.65	0.0492	636	0.939	0.951	17409	0.986	-2.38	8	-0.64	0.262	4073	0.91	0.738	13972	0.944
ASB7	-6.44	8	-1.65	0.0492	637	0.939	0.951	17408	0.985	-5.95	8	-1.77	0.0384	327	0.91	0.962	17718	0.979
DECR2	-6.44	8	-1.65	0.0494	638	0.939	0.951	17407	0.985	-2.24	8	-0.59	0.277	4405	0.91	0.723	13640	0.944
ASB13	-6.44	8	-1.65	0.0494	639	0.939	0.951	17406	0.985	-1.67	8	-0.41	0.34	5835	0.91	0.66	12210	0.944
COX5B	-6.43	8	-1.65	0.0494	640	0.939	0.951	17405	0.985	-1.25	8	-0.28	0.39	6978	0.91	0.61	11067	0.944
RYR3	-6.42	8	-1.65	0.0499	641	0.939	0.95	17404	0.985	-0.97	8	-0.19	0.424	7748	0.91	0.576	10297	0.944
UQCRQ	-6.42	8	-1.65	0.0499	642	0.939	0.95	17403	0.985	-1.39	8	-0.32	0.373	6557	0.91	0.627	11488	0.944
ACBD6	-6.41	8	-1.64	0.05	643	0.939	0.95	17402	0.985	-5.96	8	-1.77	0.0381	325	0.91	0.962	17720	0.979
STT3B	-6.41	8	-1.64	0.05	644	0.939	0.95	17401	0.985	-6.34	8	-1.89	0.0292	252	0.91	0.971	17793	0.985
BST1	-6.41	8	-1.64	0.0502	645	0.939	0.95	17400	0.985	-1.68	8	-0.42	0.339	5797	0.91	0.661	12248	0.944
JAKMIP3	-6.4	8	-1.64	0.0504	646	0.939	0.95	17399	0.985	-0.44	8	-0.02	0.492	9372	0.91	0.508	8673	0.944
RXRB	-6.39	8	-1.64	0.0507	647	0.939	0.949	17398	0.985	-2.63	8	-0.72	0.236	3502	0.91	0.764	14543	0.944
COL16A1	-6.39	8	-1.64	0.0507	648	0.939	0.949	17397	0.985	-3.11	8	-0.87	0.193	2637	0.91	0.807	15408	0.944
DNAJC3	-6.39	8	-1.64	0.0508	649	0.939	0.949	17396	0.985	-0.69	8	-0.1	0.46	8638	0.91	0.54	9407	0.944
PSG5	-3.19	2	-1.64	0.0508	650	0.939	0.949	17395	0.985	-1.81	2	-1.03	0.152	1921	0.91	0.848	16124	0.949
SERPINB13	-6.38	8	-1.64	0.0508	651	0.939	0.949	17394	0.985	-0.36	8	0	0.501	9560	0.91	0.499	8485	0.944
TAF12	-6.38	8	-1.64	0.0509	652	0.939	0.949	17393	0.985	2.85	8	1.02	0.846	16192	0.943	0.154	1853	0.944
TCERG1	-6.38	8	-1.64	0.051	653	0.939	0.949	17392	0.985	-0.5	8	-0.04	0.483	9194	0.91	0.517	8851	0.944
U2AF1	-5.04	5	-1.63	0.0511	654	0.939	0.949	17391	0.985	-0.86	5	-0.23	0.41	7433	0.91	0.59	10612	0.944
MRPL18	-6.38	8	-1.63	0.0511	655	0.939	0.949	17390	0.985	-4.08	8	-1.18	0.12	1371	0.91	0.88	16674	0.952
DYNLT1	-6.37	8	-1.63	0.0511	656	0.939	0.949	17389	0.985	-9.12	8	-2.77	0.00277	39	0.91	0.997	18006	0.999
HCRT	-6.37	8	-1.63	0.0511	657	0.939	0.949	17388	0.985	-3.62	8	-1.03	0.151	1912	0.91	0.849	16133	0.949
HYAL3	-6.37	8	-1.63	0.0511	658	0.939	0.949	17387	0.985	-1.08	8	-0.23	0.411	7455	0.91	0.589	10590	0.944
SLC7A8	-6.37	8	-1.63	0.0512	659	0.939	0.949	17386	0.985	0.64	8	0.32	0.626	12406	0.91	0.374	5639	0.944
MED26	-6.37	8	-1.63	0.0513	660	0.939	0.949	17385	0.985	0.61	8	0.31	0.622	12319	0.91	0.378	5726	0.944
KLHL31	-6.37	8	-1.63	0.0513	661	0.939	0.949	17384	0.985	-6.8	8	-2.04	0.0208	169	0.91	0.979	17876	0.988
TMEM238	-6.36	8	-1.63	0.0516	662	0.939	0.948	17383	0.984	-1.37	8	-0.32	0.376	6638	0.91	0.624	11407	0.944
GPX4	-5.5	6	-1.63	0.0516	663	0.939	0.948	17382	0.984	-5.85	6	-2.02	0.0215	174	0.91	0.978	17871	0.988
IZUMO1	-6.35	8	-1.63	0.0518	664	0.939	0.948	17381	0.984	-3.26	8	-0.92	0.18	2378	0.91	0.82	15667	0.945
ATP2B3	-6.35	8	-1.63	0.0519	665	0.939	0.948	17380	0.984	-2.88	8	-0.79	0.213	3045	0.91	0.787	15000	0.944
LMAN2	-6.34	8	-1.63	0.052	666	0.939	0.948	17379	0.984	-4.02	8	-1.16	0.123	1415	0.91	0.877	16630	0.951
SV2B	-6.34	8	-1.63	0.0521	667	0.939	0.948	17378	0.984	-0.52	8	-0.05	0.481	9143	0.91	0.519	8902	0.944
PDE12	-6.34	8	-1.62	0.0521	668	0.939	0.948	17377	0.984	-4.63	8	-1.35	0.0886	907	0.91	0.911	17138	0.96
DDX21	-4.48	4	-1.62	0.0521	669	0.939	0.948	17376	0.984	-2.46	4	-0.98	0.163	2085	0.91	0.837	15960	0.947
NDRG1	-6.33	8	-1.62	0.0523	670	0.939	0.948	17375	0.984	-6.62	8	-1.98	0.0237	193	0.91	0.976	17852	0.987
MT1M	-3.17	2	-1.62	0.0523	671	0.939	0.948	17374	0.984	-2.08	2	-1.2	0.114	1273	0.91	0.886	16772	0.953
VPS26A	-6.33	8	-1.62	0.0524	672	0.939	0.948	17373	0.984	-1.43	8	-0.34	0.368	6459	0.91	0.632	11586	0.944
SNAPIN	-6.33	8	-1.62	0.0524	673	0.939	0.948	17372	0.984	-3.04	8	-0.85	0.198	2744	0.91	0.802	15301	0.944
GOLGA1	-6.32	8	-1.62	0.0526	674	0.939	0.947	17371	0.984	-5.43	8	-1.6	0.0543	504	0.91	0.946	17541	0.973
SPATC1L	-6.31	8	-1.62	0.0529	675	0.939	0.947	17370	0.984	-3.53	8	-1	0.158	2007	0.91	0.842	16038	0.947
FZD7	-6.31	8	-1.62	0.053	676	0.939	0.947	17369	0.984	-0.26	8	0.04	0.515	9901	0.91	0.485	8144	0.944
CCNT1	-6.31	8	-1.62	0.053	677	0.939	0.947	17368	0.984	-1.05	8	-0.21	0.415	7561	0.91	0.585	10484	0.944
INSIG1	-6.31	8	-1.62	0.0531	678	0.939	0.947	17367	0.984	-2.04	8	-0.53	0.298	4892	0.91	0.702	13153	0.944
COL27A1	-6.3	8	-1.61	0.0533	679	0.939	0.947	17366	0.984	-5.09	8	-1.5	0.0673	641	0.91	0.933	17404	0.967
PDE8B	-6.3	8	-1.61	0.0533	680	0.939	0.947	17365	0.984	-5.54	8	-1.64	0.0507	461	0.91	0.949	17584	0.974
AHCYL1	-6.29	8	-1.61	0.0534	681	0.939	0.947	17364	0.984	3	8	1.07	0.857	16342	0.947	0.143	1703	0.944
IL1RN	-6.29	8	-1.61	0.0535	682	0.939	0.947	17363	0.984	0.73	8	0.35	0.636	12599	0.91	0.364	5446	0.944
DDO	-6.29	8	-1.61	0.0535	683	0.939	0.947	17362	0.984	-0.23	8	0.04	0.517	9969	0.91	0.483	8076	0.944
BCAS4	-6.29	8	-1.61	0.0535	684	0.939	0.946	17361	0.984	-3.28	8	-0.92	0.178	2353	0.91	0.822	15692	0.945
IQCE	-6.28	8	-1.61	0.0537	685	0.939	0.946	17360	0.984	-6.04	8	-1.8	0.0362	308	0.91	0.964	17737	0.981
MTRES1	-6.28	8	-1.61	0.0538	686	0.939	0.946	17359	0.984	-3.9	8	-1.12	0.132	1576	0.91	0.868	16469	0.951
DDX39A	-6.28	8	-1.61	0.0539	687	0.939	0.946	17358	0.984	-1.39	8	-0.32	0.374	6570	0.91	0.626	11475	0.944
GPR161	-6.27	8	-1.61	0.054	688	0.939	0.946	17357	0.983	-4.59	8	-1.34	0.0902	945	0.91	0.91	17100	0.96
UGT8	-6.27	8	-1.61	0.054	689	0.939	0.946	17356	0.983	-4.17	8	-1.2	0.114	1270	0.91	0.886	16775	0.953
FRRS1L	-6.27	8	-1.61	0.054	690	0.939	0.946	17355	0.983	-2.24	8	-0.59	0.276	4388	0.91	0.724	13657	0.944
SMC1B	-6.27	8	-1.61	0.0542	691	0.939	0.946	17354	0.983	-2.54	8	-0.69	0.246	3702	0.91	0.754	14343	0.944
NFU1	-6.26	8	-1.6	0.0543	692	0.939	0.946	17353	0.983	-1.93	8	-0.49	0.31	5135	0.91	0.69	12910	0.944
INCENP	-5.85	7	-1.6	0.0545	693	0.939	0.946	17352	0.983	-4.16	7	-1.29	0.0979	1044	0.91	0.902	17001	0.957
PSTPIP1	-6.26	8	-1.6	0.0545	694	0.939	0.945	17351	0.983	-4.22	8	-1.22	0.111	1224	0.91	0.889	16821	0.954
SPATA6L	-6.25	8	-1.6	0.0546	695	0.939	0.945	17350	0.983	-3.54	8	-1.01	0.157	2002	0.91	0.843	16043	0.948
CPZ	-6.25	8	-1.6	0.0546	696	0.939	0.945	17349	0.983	-2.92	8	-0.81	0.209	2963	0.91	0.791	15082	0.944
ARX	-6.25	8	-1.6	0.0546	697	0.939	0.945	17348	0.983	-4.36	8	-1.27	0.103	1111	0.91	0.897	16934	0.956
CCDC120	-6.25	8	-1.6	0.0547	698	0.939	0.945	17347	0.983	-4.54	8	-1.32	0.093	978	0.91	0.907	17067	0.959
RAB11FIP4	-6.24	8	-1.6	0.0549	699	0.939	0.945	17346	0.983	-1	8	-0.2	0.421	7678	0.91	0.579	10367	0.944
NCF1	-6.24	8	-1.6	0.0549	700	0.939	0.945	17345	0.983	-3.78	8	-1.08	0.14	1699	0.91	0.86	16346	0.95
PRSS12	-6.24	8	-1.6	0.055	701	0.939	0.945	17344	0.983	-1.45	8	-0.34	0.366	6383	0.91	0.634	11662	0.944
C7orf61	-6.24	8	-1.6	0.0551	702	0.939	0.945	17343	0.983	-6.53	8	-1.95	0.0255	219	0.91	0.975	17826	0.986
PDK2	-6.23	8	-1.6	0.0552	703	0.939	0.945	17342	0.983	-7.31	8	-2.2	0.0139	120	0.91	0.986	17925	0.993
NDUFA2	-6.23	8	-1.6	0.0552	704	0.939	0.945	17341	0.983	-4.02	8	-1.16	0.123	1414	0.91	0.877	16631	0.951
ZNF668	-6.22	8	-1.59	0.0555	705	0.939	0.945	17340	0.983	-1.55	8	-0.37	0.355	6149	0.91	0.645	11896	0.944
FARS2	-6.22	8	-1.59	0.0555	706	0.939	0.945	17339	0.983	-0.31	8	0.02	0.507	9714	0.91	0.493	8331	0.944
SUCLA2	-6.22	8	-1.59	0.0556	707	0.939	0.944	17338	0.983	-2.75	8	-0.75	0.226	3288	0.91	0.774	14757	0.944
ADAP2	-6.22	8	-1.59	0.0557	708	0.939	0.944	17337	0.983	-6.55	8	-1.96	0.0251	213	0.91	0.975	17832	0.986
IDH3A	-6.22	8	-1.59	0.0557	709	0.939	0.944	17336	0.983	-2.53	8	-0.68	0.247	3741	0.91	0.753	14304	0.944
MRPL14	-6.22	8	-1.59	0.0557	710	0.939	0.944	17335	0.983	1.56	8	0.61	0.73	14329	0.919	0.27	3716	0.944
GALNT2	-6.21	8	-1.59	0.0558	711	0.939	0.944	17334	0.983	0.53	8	0.28	0.612	12123	0.91	0.388	5922	0.944
ISOC1	-6.21	8	-1.59	0.0559	712	0.939	0.944	17333	0.983	-2.56	8	-0.69	0.244	3660	0.91	0.756	14385	0.944
MS4A6A	-6.21	8	-1.59	0.0559	713	0.939	0.944	17332	0.983	-4.56	8	-1.33	0.0918	966	0.91	0.908	17079	0.959
NDUFB11	-6.2	8	-1.59	0.0563	714	0.939	0.944	17331	0.983	-3.55	8	-1.01	0.157	1990	0.91	0.843	16055	0.948
WFDC1	-6.2	8	-1.59	0.0563	715	0.939	0.944	17330	0.983	-7.1	8	-2.13	0.0164	130	0.91	0.984	17915	0.991
ABCF2	-6.2	8	-1.59	0.0563	716	0.939	0.944	17329	0.983	0.76	8	0.36	0.64	12684	0.91	0.36	5361	0.944
XPO5	-6.19	8	-1.59	0.0563	717	0.939	0.944	17328	0.983	-5.51	8	-1.63	0.0514	472	0.91	0.949	17573	0.974
SMPD1	-6.19	8	-1.59	0.0564	718	0.939	0.944	17327	0.983	-1.76	8	-0.44	0.329	5573	0.91	0.671	12472	0.944
DMRT3	-6.19	8	-1.59	0.0565	719	0.939	0.944	17326	0.983	-1.19	8	-0.26	0.398	7169	0.91	0.602	10876	0.944
OGFR	-6.19	8	-1.58	0.0565	720	0.939	0.944	17325	0.983	-0.59	8	-0.07	0.472	8909	0.91	0.528	9136	0.944
HLA-DPB1	-6.18	8	-1.58	0.0567	721	0.939	0.943	17324	0.983	-1.4	8	-0.33	0.372	6542	0.91	0.628	11503	0.944
MAGEE1	-6.18	8	-1.58	0.0567	722	0.939	0.943	17323	0.983	-1.91	8	-0.49	0.313	5196	0.91	0.687	12849	0.944
ZNF524	-6.18	8	-1.58	0.0568	723	0.939	0.943	17322	0.983	-2.29	8	-0.61	0.272	4272	0.91	0.728	13773	0.944
TGFBR2	-6.18	8	-1.58	0.0568	724	0.939	0.943	17321	0.983	-0.2	8	0.05	0.522	10070	0.91	0.478	7975	0.944
GPT	-6.18	8	-1.58	0.0569	725	0.939	0.943	17320	0.983	0.05	8	0.13	0.554	10821	0.91	0.446	7224	0.944
DHX38	-6.18	8	-1.58	0.0569	726	0.939	0.943	17319	0.983	-6	8	-1.78	0.0372	318	0.91	0.963	17727	0.98
MGLL	-6.18	8	-1.58	0.0569	727	0.939	0.943	17318	0.983	-2.53	8	-0.69	0.247	3725	0.91	0.753	14320	0.944
CEP250	-6.18	8	-1.58	0.0569	728	0.939	0.943	17317	0.983	-4.65	8	-1.36	0.0872	888	0.91	0.913	17157	0.96
OTOGL	-4.37	4	-1.58	0.057	729	0.939	0.943	17316	0.983	-1.99	4	-0.78	0.219	3152	0.91	0.781	14893	0.944
ELL	-6.17	8	-1.58	0.057	730	0.939	0.943	17315	0.983	-3.94	7	-1.22	0.111	1233	0.91	0.889	16812	0.954
DEF8	-6.17	8	-1.58	0.057	731	0.939	0.943	17314	0.983	-7.55	8	-2.28	0.0114	102	0.91	0.989	17943	0.994
MAP4K1	-6.17	8	-1.58	0.057	732	0.939	0.943	17313	0.983	-1.33	8	-0.3	0.38	6743	0.91	0.62	11302	0.944
PTPRE	-6.16	8	-1.58	0.0574	733	0.939	0.943	17312	0.982	-7.08	8	-2.13	0.0167	131	0.91	0.983	17914	0.99
MX2	-6.16	8	-1.58	0.0574	734	0.939	0.943	17311	0.982	-0.84	8	-0.15	0.44	8158	0.91	0.56	9887	0.944
NDUFB7	-5.33	6	-1.58	0.0576	735	0.939	0.942	17310	0.982	-0.33	6	0	0.499	9529	0.91	0.501	8516	0.944
FANCL	-6.15	8	-1.57	0.0577	736	0.939	0.942	17309	0.982	-0.67	8	-0.09	0.462	8690	0.91	0.538	9355	0.944
CAV3	-6.15	8	-1.57	0.0578	737	0.939	0.942	17308	0.982	-2.49	8	-0.67	0.25	3813	0.91	0.75	14232	0.944
USP48	-6.14	8	-1.57	0.0579	738	0.939	0.942	17307	0.982	-3.75	8	-1.07	0.142	1746	0.91	0.858	16299	0.95
FBXO2	-6.14	8	-1.57	0.0579	739	0.939	0.942	17306	0.982	-2.97	8	-0.82	0.205	2870	0.91	0.795	15175	0.944
PAN3	-6.14	8	-1.57	0.058	740	0.939	0.942	17305	0.982	-8.44	8	-2.56	0.00526	56	0.91	0.995	17989	0.998
PLEKHJ1	-6.14	8	-1.57	0.058	741	0.939	0.942	17304	0.982	-1.3	8	-0.29	0.385	6841	0.91	0.615	11204	0.944
NDUFB4	-6.14	8	-1.57	0.0582	742	0.939	0.942	17303	0.982	-4.24	8	-1.23	0.11	1212	0.91	0.89	16833	0.954
ZNF175	-6.13	8	-1.57	0.0583	743	0.939	0.942	17302	0.982	-2.23	8	-0.59	0.278	4429	0.91	0.722	13616	0.944
DPP3	-6.13	8	-1.57	0.0583	744	0.939	0.942	17301	0.982	-6.48	8	-1.94	0.0263	226	0.91	0.974	17819	0.986
ARHGAP22	-6.12	8	-1.57	0.0585	745	0.939	0.941	17300	0.982	-1.83	8	-0.46	0.322	5395	0.91	0.678	12650	0.944
SYT8	-6.12	8	-1.57	0.0586	746	0.939	0.941	17299	0.982	-6.13	8	-1.83	0.0339	290	0.91	0.966	17755	0.982
FTSJ3	-5.72	7	-1.57	0.0587	747	0.939	0.941	17298	0.982	-1.92	6	-0.59	0.279	4463	0.91	0.721	13582	0.944
AKT1	-6.11	8	-1.56	0.0588	748	0.939	0.941	17297	0.982	-1.89	8	-0.48	0.315	5254	0.91	0.685	12791	0.944
HAGHL	-6.11	8	-1.56	0.0588	749	0.939	0.941	17296	0.982	-1.74	8	-0.43	0.332	5639	0.91	0.668	12406	0.944
CPPED1	-6.11	8	-1.56	0.0588	750	0.939	0.941	17295	0.982	-5.91	8	-1.76	0.0396	342	0.91	0.96	17703	0.979
GPNMB	-6.11	8	-1.56	0.0589	751	0.939	0.941	17294	0.982	-1.41	8	-0.33	0.371	6510	0.91	0.629	11535	0.944
SHROOM2	-6.11	8	-1.56	0.0589	752	0.939	0.941	17293	0.982	-0.37	8	0	0.5	9543	0.91	0.5	8502	0.944
CORO1A	-6.11	8	-1.56	0.0589	753	0.939	0.941	17292	0.982	-1.47	8	-0.35	0.364	6349	0.91	0.636	11696	0.944
TARS2	-6.11	8	-1.56	0.059	754	0.939	0.941	17291	0.982	0.69	8	0.34	0.632	12525	0.91	0.368	5520	0.944
UBE2L3	-6.11	8	-1.56	0.059	755	0.939	0.941	17290	0.982	-0.76	8	-0.12	0.451	8426	0.91	0.549	9619	0.944
DDX39B	-6.11	8	-1.56	0.059	756	0.939	0.941	17289	0.982	3.64	8	1.27	0.898	16824	0.963	0.102	1221	0.944
TMEM200B	-6.11	8	-1.56	0.0591	757	0.939	0.941	17288	0.982	-1.31	8	-0.3	0.382	6790	0.91	0.618	11255	0.944
PRDX2	-6.11	8	-1.56	0.0591	758	0.939	0.941	17287	0.982	-4.45	8	-1.29	0.0979	1043	0.91	0.902	17002	0.957
TMEM30A	-6.1	8	-1.56	0.0592	759	0.939	0.941	17286	0.982	-2.75	8	-0.76	0.225	3262	0.91	0.775	14783	0.944
RBM44	-6.1	8	-1.56	0.0592	760	0.939	0.941	17285	0.982	-3.21	8	-0.9	0.184	2455	0.91	0.816	15590	0.945
SEMA3F	-6.09	8	-1.56	0.0594	761	0.939	0.941	17284	0.982	-4.73	8	-1.38	0.0833	842	0.91	0.917	17203	0.961
EFCC1	-6.09	8	-1.56	0.0594	762	0.939	0.941	17283	0.982	-0.8	8	-0.14	0.446	8306	0.91	0.554	9739	0.944
FGFR1OP	-6.09	8	-1.56	0.0595	763	0.939	0.94	17282	0.982	-4.79	8	-1.4	0.0808	802	0.91	0.919	17243	0.962
KRTAP10-3	-6.09	8	-1.56	0.0596	764	0.939	0.94	17281	0.982	-1.82	8	-0.46	0.323	5425	0.91	0.677	12620	0.944
SYCE1	-6.09	8	-1.56	0.0597	765	0.939	0.94	17280	0.982	1.21	8	0.5	0.692	13696	0.912	0.308	4349	0.944
SLC16A8	-6.09	8	-1.56	0.0597	766	0.939	0.94	17279	0.982	-5.34	8	-1.58	0.0575	541	0.91	0.943	17504	0.972
C6orf62	-6.08	8	-1.56	0.0598	767	0.939	0.94	17278	0.982	-2.15	8	-0.57	0.286	4625	0.91	0.714	13420	0.944
GTF2F1	-6.08	8	-1.56	0.0598	768	0.939	0.94	17277	0.982	-0.17	8	0.06	0.526	10169	0.91	0.474	7876	0.944
ADRA2B	-6.08	8	-1.56	0.0599	769	0.939	0.94	17276	0.982	-0.85	8	-0.15	0.44	8142	0.91	0.56	9903	0.944
LacZ	-29.77	192	-1.55	0.06	770	0.939	0.94	17275	0.982	-35.49	192	-2.18	0.0147	125	0.91	0.985	17920	0.992
ASH2L	-6.07	8	-1.55	0.0601	771	0.939	0.94	17274	0.982	8.19	8	2.71	0.997	17813	1	0.00332	232	0.258
LRP6	-6.07	8	-1.55	0.0602	772	0.939	0.94	17273	0.982	-2.41	8	-0.65	0.259	4011	0.91	0.741	14034	0.944
MTO1	-6.07	8	-1.55	0.0603	773	0.939	0.94	17272	0.982	-0.71	8	-0.11	0.458	8582	0.91	0.542	9463	0.944
FHAD1	-6.06	8	-1.55	0.0604	774	0.939	0.94	17271	0.982	-2.17	8	-0.57	0.284	4576	0.91	0.716	13469	0.944
HMGXB4	-6.06	8	-1.55	0.0604	775	0.939	0.94	17270	0.982	1.42	8	0.57	0.715	14070	0.917	0.285	3975	0.944
LONRF2	-6.06	8	-1.55	0.0605	776	0.939	0.939	17269	0.982	-4.95	8	-1.45	0.0731	709	0.91	0.927	17336	0.965
FBXO27	-6.05	8	-1.55	0.0607	777	0.939	0.939	17268	0.981	-2.5	8	-0.68	0.249	3787	0.91	0.751	14258	0.944
ZNF684	-6.05	8	-1.55	0.0607	778	0.939	0.939	17267	0.981	-1.48	8	-0.35	0.362	6312	0.91	0.638	11733	0.944
COX4I1	-6.05	8	-1.55	0.061	779	0.939	0.939	17266	0.981	-3	8	-0.83	0.202	2818	0.91	0.798	15227	0.944
CTHRC1	-6.05	8	-1.55	0.061	780	0.939	0.939	17265	0.981	-5.66	8	-1.68	0.0469	422	0.91	0.953	17623	0.976
SPOCK2	-6.04	8	-1.55	0.0611	781	0.939	0.939	17264	0.981	1.09	8	0.46	0.679	13458	0.91	0.321	4587	0.944
EREG	-6.04	8	-1.55	0.0611	782	0.939	0.939	17263	0.981	-3.13	8	-0.87	0.191	2597	0.91	0.809	15448	0.944
BCL2L10	-6.04	8	-1.55	0.0612	783	0.939	0.939	17262	0.981	-0.97	8	-0.19	0.425	7765	0.91	0.575	10280	0.944
MSI1	-6.04	8	-1.54	0.0612	784	0.939	0.939	17261	0.981	-2.44	8	-0.66	0.256	3925	0.91	0.744	14120	0.944
AEBP1	-6.03	8	-1.54	0.0615	785	0.939	0.938	17260	0.981	-1.59	8	-0.39	0.349	6022	0.91	0.651	12023	0.944
EGR3	-6.03	8	-1.54	0.0616	786	0.939	0.938	17259	0.981	-3.57	8	-1.02	0.155	1967	0.91	0.845	16078	0.948
CENPN	-5.64	7	-1.54	0.0617	787	0.939	0.938	17258	0.981	-3.84	7	-1.18	0.118	1348	0.91	0.882	16697	0.952
MRPL35	-6.02	8	-1.54	0.0617	788	0.939	0.938	17257	0.981	0.11	8	0.15	0.561	10986	0.91	0.439	7059	0.944
CNOT6	-6.02	8	-1.54	0.0617	789	0.939	0.938	17256	0.981	-5.87	8	-1.74	0.0407	357	0.91	0.959	17688	0.979
MME	-6.02	8	-1.54	0.0618	790	0.939	0.938	17255	0.981	-3.85	8	-1.1	0.135	1617	0.91	0.865	16428	0.95
MED13	-6.02	8	-1.54	0.0618	791	0.939	0.938	17254	0.981	4.51	8	1.55	0.939	17234	0.983	0.0608	811	0.944
PJA2	-6.02	8	-1.54	0.0618	792	0.939	0.938	17253	0.981	-4.77	8	-1.4	0.0814	809	0.91	0.919	17236	0.962
LLGL2	-6.02	8	-1.54	0.0619	793	0.939	0.938	17252	0.981	-3.93	8	-1.13	0.13	1539	0.91	0.87	16506	0.951
LRRTM1	-6.02	8	-1.54	0.062	794	0.939	0.938	17251	0.981	-2.05	8	-0.53	0.297	4884	0.91	0.703	13161	0.944
TRIM59	-6.01	8	-1.54	0.062	795	0.939	0.938	17250	0.981	-3.34	8	-0.94	0.173	2252	0.91	0.827	15793	0.945
OR4K15	-6.01	8	-1.54	0.0621	796	0.939	0.938	17249	0.981	-3.54	8	-1.01	0.157	1999	0.91	0.843	16046	0.948
MDS2	-6.01	8	-1.54	0.0623	797	0.939	0.938	17248	0.981	-0.85	8	-0.15	0.439	8126	0.91	0.561	9919	0.944
PLCG2	-6.01	8	-1.54	0.0623	798	0.939	0.938	17247	0.981	-3.34	8	-0.94	0.173	2259	0.91	0.827	15786	0.945
DCHS2	-6.01	8	-1.54	0.0623	799	0.939	0.938	17246	0.981	-4.22	8	-1.22	0.111	1230	0.91	0.889	16815	0.954
NDUFS8	-6	8	-1.53	0.0624	800	0.939	0.938	17245	0.981	-4.86	8	-1.42	0.0774	763	0.91	0.923	17282	0.963
NUDT16	-6	8	-1.53	0.0625	801	0.939	0.937	17244	0.981	-4.22	8	-1.22	0.111	1226	0.91	0.889	16819	0.954
BTN1A1	-6	8	-1.53	0.0626	802	0.939	0.937	17243	0.981	-2.37	8	-0.63	0.264	4091	0.91	0.736	13954	0.944
HNF4A	-6	8	-1.53	0.0626	803	0.939	0.937	17242	0.981	-3.86	8	-1.11	0.134	1611	0.91	0.866	16434	0.95
MTHFS	-5.99	8	-1.53	0.0627	804	0.939	0.937	17241	0.981	-5.64	8	-1.67	0.0474	426	0.91	0.953	17619	0.976
RRP36	-5.6	7	-1.53	0.0628	805	0.939	0.937	17240	0.981	2.14	7	0.84	0.8	15521	0.931	0.2	2524	0.944
CCDC102B	-5.99	8	-1.53	0.0628	806	0.939	0.937	17239	0.981	-1.57	8	-0.38	0.351	6081	0.91	0.649	11964	0.944
MPPE1	-5.98	8	-1.53	0.063	807	0.939	0.937	17238	0.981	-5.13	8	-1.51	0.0657	620	0.91	0.934	17425	0.967
ESRRG	-5.98	8	-1.53	0.063	808	0.939	0.937	17237	0.981	-2.41	8	-0.65	0.259	3998	0.91	0.741	14047	0.944
BCCIP	-5.6	7	-1.53	0.0631	809	0.939	0.937	17236	0.981	-2.95	7	-0.88	0.188	2547	0.91	0.812	15498	0.944
FANCG	-5.98	8	-1.53	0.0631	810	0.939	0.937	17235	0.981	-1.94	8	-0.5	0.31	5127	0.91	0.69	12918	0.944
INAFM1	-5.98	8	-1.53	0.0632	811	0.939	0.937	17234	0.981	-1.71	8	-0.42	0.336	5729	0.91	0.664	12316	0.944
BDKRB1	-5.98	8	-1.53	0.0633	812	0.939	0.937	17233	0.981	-1.91	8	-0.49	0.312	5179	0.91	0.688	12866	0.944
AP4E1	-5.98	8	-1.53	0.0633	813	0.939	0.937	17232	0.981	-7.37	8	-2.22	0.0133	118	0.91	0.987	17927	0.993
EEF1E1	-5.98	8	-1.53	0.0633	814	0.939	0.937	17231	0.981	0.53	8	0.29	0.612	12134	0.91	0.388	5911	0.944
IZUMO2	-5.98	8	-1.53	0.0633	815	0.939	0.937	17230	0.981	-3.68	8	-1.05	0.147	1833	0.91	0.853	16212	0.949
METAP1D	-5.97	8	-1.53	0.0633	816	0.939	0.937	17229	0.981	-1.85	8	-0.47	0.319	5342	0.91	0.681	12703	0.944
RAMP2	-5.97	8	-1.53	0.0636	817	0.939	0.936	17228	0.981	2.15	8	0.8	0.788	15343	0.927	0.212	2702	0.944
SFXN1	-5.96	8	-1.52	0.0637	818	0.939	0.936	17227	0.981	-0.84	8	-0.15	0.441	8186	0.91	0.559	9859	0.944
WDCP	-5.96	8	-1.52	0.0637	819	0.939	0.936	17226	0.981	1.53	8	0.6	0.727	14269	0.919	0.273	3776	0.944
ZNF335	-5.96	8	-1.52	0.0638	820	0.939	0.936	17225	0.981	-2.56	8	-0.69	0.244	3657	0.91	0.756	14388	0.944
MRPL36	-5.96	8	-1.52	0.0639	821	0.939	0.936	17224	0.981	1.99	8	0.75	0.773	15079	0.925	0.227	2966	0.944
AKAP1	-5.95	8	-1.52	0.064	822	0.939	0.936	17223	0.981	-1.4	8	-0.33	0.372	6550	0.91	0.628	11495	0.944
UPF3B	-5.95	8	-1.52	0.0641	823	0.939	0.936	17222	0.981	1.04	8	0.45	0.672	13327	0.91	0.328	4718	0.944
RHOB	-5.95	8	-1.52	0.0641	824	0.939	0.936	17221	0.981	-2.5	8	-0.68	0.25	3792	0.91	0.75	14253	0.944
FASN	-5.95	8	-1.52	0.0641	825	0.939	0.936	17220	0.981	-2.63	8	-0.72	0.236	3504	0.91	0.764	14541	0.944
BCAM	-5.94	8	-1.52	0.0644	826	0.939	0.936	17219	0.98	-3	8	-0.83	0.202	2821	0.91	0.798	15224	0.944
TAGLN2	-5.94	8	-1.52	0.0644	827	0.939	0.936	17218	0.98	-5.26	8	-1.55	0.0604	568	0.91	0.94	17477	0.97
BAG6	-5.94	8	-1.52	0.0644	828	0.939	0.936	17217	0.98	0.7	8	0.34	0.633	12537	0.91	0.367	5508	0.944
BUB3	-4.7	5	-1.52	0.0645	829	0.939	0.936	17216	0.98	-0.35	4	-0.04	0.484	9214	0.91	0.516	8831	0.944
DHRS1	-5.94	8	-1.52	0.0646	830	0.939	0.935	17215	0.98	-1.39	8	-0.32	0.374	6579	0.91	0.626	11466	0.944
IGHMBP2	-5.93	8	-1.52	0.0647	831	0.939	0.935	17214	0.98	-2.32	8	-0.62	0.269	4199	0.91	0.731	13846	0.944
PET100	-5.93	8	-1.52	0.0648	832	0.939	0.935	17213	0.98	-0.37	8	0	0.5	9535	0.91	0.5	8510	0.944
SMO	-5.93	8	-1.51	0.0649	833	0.939	0.935	17212	0.98	-3.41	8	-0.96	0.168	2167	0.91	0.832	15878	0.946
NDUFA10	-5.92	8	-1.51	0.0651	834	0.939	0.935	17211	0.98	0.1	8	0.15	0.559	10930	0.91	0.441	7115	0.944
CD83	-5.91	8	-1.51	0.0653	835	0.939	0.935	17210	0.98	-4.72	8	-1.38	0.0839	852	0.91	0.916	17193	0.961
FAH	-5.91	8	-1.51	0.0654	836	0.939	0.935	17209	0.98	-1.84	8	-0.47	0.32	5367	0.91	0.68	12678	0.944
RFXANK	-5.91	8	-1.51	0.0654	837	0.939	0.935	17208	0.98	-3.41	8	-0.96	0.168	2165	0.91	0.832	15880	0.946
ZNF532	-5.91	8	-1.51	0.0655	838	0.939	0.935	17207	0.98	-3.99	8	-1.15	0.125	1458	0.91	0.875	16587	0.951
MYL1	-5.91	8	-1.51	0.0655	839	0.939	0.934	17206	0.98	-2.94	8	-0.81	0.208	2941	0.91	0.792	15104	0.944
PLAA	-5.91	8	-1.51	0.0656	840	0.939	0.934	17205	0.98	-5.98	8	-1.78	0.0377	323	0.91	0.962	17722	0.98
MROH6	-5.9	8	-1.51	0.0657	841	0.939	0.934	17204	0.98	-3.31	8	-0.93	0.176	2311	0.91	0.824	15734	0.945
ACHE	-5.9	8	-1.51	0.0657	842	0.939	0.934	17203	0.98	-4.37	8	-1.27	0.102	1103	0.91	0.898	16942	0.956
IRS1	-5.9	8	-1.51	0.0657	843	0.939	0.934	17202	0.98	-0.52	8	-0.05	0.481	9136	0.91	0.519	8909	0.944
MRPL53	-5.9	8	-1.51	0.0658	844	0.939	0.934	17201	0.98	-0.45	8	-0.02	0.49	9351	0.91	0.51	8694	0.944
ITIH6	-5.9	8	-1.51	0.0658	845	0.939	0.934	17200	0.98	0.17	8	0.17	0.568	11155	0.91	0.432	6890	0.944
UCMA	-5.89	8	-1.51	0.066	846	0.939	0.934	17199	0.98	-2.3	8	-0.61	0.27	4226	0.91	0.73	13819	0.944
NMNAT2	-5.89	8	-1.51	0.0661	847	0.939	0.934	17198	0.98	-2.78	8	-0.76	0.223	3220	0.91	0.777	14825	0.944
ACVR2A	-5.89	8	-1.51	0.0661	848	0.939	0.934	17197	0.98	-4.51	8	-1.31	0.0948	998	0.91	0.905	17047	0.958
RTN4IP1	-5.89	8	-1.51	0.0661	849	0.939	0.934	17196	0.98	-1.21	8	-0.27	0.395	7103	0.91	0.605	10942	0.944
DLG4	-5.89	8	-1.5	0.0662	850	0.939	0.934	17195	0.98	-2.46	8	-0.66	0.254	3878	0.91	0.746	14167	0.944
HSPA8	-5.89	8	-1.5	0.0663	851	0.939	0.934	17194	0.98	6.06	8	2.04	0.979	17586	1	0.0208	459	0.817
DDX5	-5.88	8	-1.5	0.0665	852	0.939	0.934	17193	0.98	2.57	8	0.93	0.824	15871	0.937	0.176	2174	0.944
ZNF852	-5.88	8	-1.5	0.0665	853	0.939	0.933	17192	0.98	-5.38	8	-1.59	0.0559	522	0.91	0.944	17523	0.972
FOXO6	-5.88	8	-1.5	0.0666	854	0.939	0.933	17191	0.98	-2.89	8	-0.8	0.212	3016	0.91	0.788	15029	0.944
METRNL	-5.87	8	-1.5	0.0668	855	0.939	0.933	17190	0.98	-1.92	8	-0.49	0.312	5173	0.91	0.688	12872	0.944
NUDT1	-5.87	8	-1.5	0.0668	856	0.939	0.933	17189	0.98	-3.77	8	-1.08	0.141	1723	0.91	0.859	16322	0.95
ACTR1B	-5.87	8	-1.5	0.0669	857	0.939	0.933	17188	0.98	-4.11	8	-1.19	0.118	1336	0.91	0.882	16709	0.952
BID	-5.87	8	-1.5	0.0669	858	0.939	0.933	17187	0.98	-2.25	8	-0.6	0.276	4369	0.91	0.724	13676	0.944
UBAP2	-5.87	8	-1.5	0.0669	859	0.939	0.933	17186	0.98	-3.9	8	-1.12	0.132	1575	0.91	0.868	16470	0.951
KLHL42	-5.87	8	-1.5	0.067	860	0.939	0.933	17185	0.98	-1.21	8	-0.27	0.394	7065	0.91	0.606	10980	0.944
GAS6	-5.87	8	-1.5	0.067	861	0.939	0.933	17184	0.98	-1.89	8	-0.48	0.315	5228	0.91	0.685	12817	0.944
MKRN3	-5.87	8	-1.5	0.067	862	0.939	0.933	17183	0.98	-2.6	8	-0.71	0.24	3563	0.91	0.76	14482	0.944
IBTK	-5.86	8	-1.5	0.0671	863	0.939	0.933	17182	0.98	-3.25	8	-0.91	0.18	2390	0.91	0.82	15655	0.945
TCIRG1	-5.86	8	-1.5	0.0673	864	0.939	0.933	17181	0.98	-3.16	8	-0.89	0.188	2538	0.91	0.812	15507	0.944
ARMC8	-5.85	8	-1.49	0.0676	865	0.939	0.932	17180	0.979	-1.5	8	-0.36	0.36	6266	0.91	0.64	11779	0.944
NPLOC4	-5.85	8	-1.49	0.0677	866	0.939	0.932	17179	0.979	3.54	8	1.24	0.893	16764	0.961	0.107	1281	0.944
MAP2K2	-5.85	8	-1.49	0.0677	867	0.939	0.932	17178	0.979	-1.25	8	-0.28	0.39	6977	0.91	0.61	11068	0.944
EPHB3	-5.84	8	-1.49	0.0678	868	0.939	0.932	17177	0.979	-2.04	8	-0.53	0.299	4902	0.91	0.701	13143	0.944
HOXC12	-5.84	8	-1.49	0.0679	869	0.939	0.932	17176	0.979	-3.48	8	-0.98	0.162	2082	0.91	0.838	15963	0.947
ARL6IP6	-5.84	8	-1.49	0.068	870	0.939	0.932	17175	0.979	2.23	8	0.82	0.795	15433	0.93	0.205	2612	0.944
ZBTB38	-5.83	8	-1.49	0.0682	871	0.939	0.932	17174	0.979	5.02	8	1.71	0.956	17363	0.994	0.0438	682	0.944
RANBP3	-5.83	8	-1.49	0.0682	872	0.939	0.932	17173	0.979	-5.98	8	-1.78	0.0378	324	0.91	0.962	17721	0.98
PDAP1	-5.83	8	-1.49	0.0682	873	0.939	0.932	17172	0.979	5.21	8	1.77	0.962	17406	0.997	0.0384	639	0.944
ATP2A3	-5.83	8	-1.49	0.0683	874	0.939	0.932	17171	0.979	-1.24	8	-0.28	0.392	7010	0.91	0.608	11035	0.944
MTIF3	-5.83	8	-1.49	0.0683	875	0.939	0.932	17170	0.979	-1.32	8	-0.3	0.382	6780	0.91	0.618	11265	0.944
SPATA2	-5.83	8	-1.49	0.0683	876	0.939	0.932	17169	0.979	-0.39	8	-0.01	0.498	9498	0.91	0.502	8547	0.944
IGSF9	-5.83	8	-1.49	0.0684	877	0.939	0.932	17168	0.979	-5.76	8	-1.71	0.0439	379	0.91	0.956	17666	0.977
AIFM3	-5.82	8	-1.49	0.0685	878	0.939	0.932	17167	0.979	-0.19	8	0.06	0.523	10118	0.91	0.477	7927	0.944
VAT1L	-5.82	8	-1.49	0.0686	879	0.939	0.931	17166	0.979	-2.29	8	-0.61	0.271	4262	0.91	0.729	13783	0.944
SLC25A4	-5.82	8	-1.49	0.0687	880	0.939	0.931	17165	0.979	-2.63	8	-0.72	0.237	3507	0.91	0.763	14538	0.944
PLP1	-5.82	8	-1.49	0.0687	881	0.939	0.931	17164	0.979	-6.31	8	-1.88	0.0299	265	0.91	0.97	17780	0.984
DEK	-5.82	8	-1.49	0.0688	882	0.939	0.931	17163	0.979	-1.86	8	-0.47	0.318	5325	0.91	0.682	12720	0.944
CCNI	-5.82	8	-1.48	0.0688	883	0.939	0.931	17162	0.979	-4.07	8	-1.17	0.12	1382	0.91	0.88	16663	0.952
ALKBH1	-5.81	8	-1.48	0.0688	884	0.939	0.931	17161	0.979	-3.31	8	-0.93	0.176	2309	0.91	0.824	15736	0.945
UGGT2	-5.81	8	-1.48	0.069	885	0.939	0.931	17160	0.979	-1.25	8	-0.28	0.391	6983	0.91	0.609	11062	0.944
BORCS7	-5.81	8	-1.48	0.069	886	0.939	0.931	17159	0.979	-1.32	8	-0.3	0.382	6772	0.91	0.618	11273	0.944
ZADH2	-5.81	8	-1.48	0.0691	887	0.939	0.931	17158	0.979	-4.6	8	-1.34	0.0897	934	0.91	0.91	17111	0.96
HAUS4	-5.8	8	-1.48	0.0692	888	0.939	0.931	17157	0.979	-3.33	8	-0.94	0.174	2280	0.91	0.826	15765	0.945
LTBR	-5.8	8	-1.48	0.0692	889	0.939	0.931	17156	0.979	-3.75	8	-1.07	0.142	1750	0.91	0.858	16295	0.95
GPR26	-5.8	8	-1.48	0.0693	890	0.939	0.931	17155	0.979	-1.05	8	-0.22	0.415	7553	0.91	0.585	10492	0.944
KRTAP21-2	-4.1	4	-1.48	0.0695	891	0.939	0.93	17154	0.979	-1.75	4	-0.67	0.252	3846	0.91	0.748	14199	0.944
PABPN1L	-5.79	8	-1.48	0.0696	892	0.939	0.93	17153	0.979	-4.96	8	-1.45	0.0729	707	0.91	0.927	17338	0.965
DSCC1	-5.79	8	-1.48	0.0696	893	0.939	0.93	17152	0.979	7.26	8	2.42	0.992	17746	1	0.00776	299	0.467
TSPYL4	-5.79	8	-1.48	0.0696	894	0.939	0.93	17151	0.979	-4.93	8	-1.44	0.0743	723	0.91	0.926	17322	0.964
MPST	-5.79	8	-1.48	0.0696	895	0.939	0.93	17150	0.979	-3.86	8	-1.11	0.134	1609	0.91	0.866	16436	0.95
DKK3	-5.79	8	-1.48	0.0697	896	0.939	0.93	17149	0.979	-3.17	8	-0.89	0.187	2515	0.91	0.813	15530	0.945
CEACAM21	-5.79	8	-1.48	0.0697	897	0.939	0.93	17148	0.979	-3.01	8	-0.84	0.202	2802	0.91	0.798	15243	0.944
GTPBP2	-5.79	8	-1.48	0.0698	898	0.939	0.93	17147	0.979	-0.13	8	0.08	0.531	10309	0.91	0.469	7736	0.944
UCP1	-5.79	8	-1.48	0.0698	899	0.939	0.93	17146	0.979	-6.7	8	-2.01	0.0223	183	0.91	0.978	17862	0.988
NDUFAF1	-5.79	8	-1.48	0.0698	900	0.939	0.93	17145	0.979	-2.54	8	-0.69	0.246	3700	0.91	0.754	14345	0.944
CNBP	-5.79	8	-1.48	0.0699	901	0.939	0.93	17144	0.979	-1.58	8	-0.38	0.351	6057	0.91	0.649	11988	0.944
UCK1	-5.79	8	-1.48	0.0699	902	0.939	0.93	17143	0.979	1.07	8	0.46	0.676	13397	0.91	0.324	4648	0.944
SERTAD2	-5.78	8	-1.48	0.0699	903	0.939	0.93	17142	0.979	-1.99	8	-0.51	0.304	5011	0.91	0.696	13034	0.944
CTNND1	-5.78	8	-1.48	0.0699	904	0.939	0.93	17141	0.979	-4.29	8	-1.24	0.107	1168	0.91	0.893	16877	0.955
DUOXA1	-5.78	8	-1.48	0.0699	905	0.939	0.93	17140	0.979	-2.85	8	-0.79	0.216	3096	0.91	0.784	14949	0.944
ERBIN	-5.78	8	-1.48	0.07	906	0.939	0.93	17139	0.979	-4.81	8	-1.41	0.0798	795	0.91	0.92	17250	0.963
TMEM47	-5.78	8	-1.48	0.07	907	0.939	0.93	17138	0.979	-2.43	8	-0.65	0.257	3959	0.91	0.743	14086	0.944
FOXG1	-5.78	8	-1.47	0.0701	908	0.939	0.93	17137	0.979	-2.91	8	-0.81	0.21	2984	0.91	0.79	15061	0.944
MED11	-5.4	7	-1.47	0.0702	909	0.939	0.93	17136	0.979	-1.16	7	-0.28	0.391	6992	0.91	0.609	11053	0.944
MAFA	-5.77	8	-1.47	0.0703	910	0.939	0.93	17135	0.979	-3.24	8	-0.91	0.181	2412	0.91	0.819	15633	0.945
TPRKB	-5.77	8	-1.47	0.0703	911	0.939	0.93	17134	0.979	-6.45	8	-1.93	0.027	236	0.91	0.973	17809	0.986
CD84	-5.77	8	-1.47	0.0706	912	0.939	0.929	17133	0.979	-0.88	8	-0.16	0.435	8032	0.91	0.565	10013	0.944
AIPL1	-5.76	8	-1.47	0.0706	913	0.939	0.929	17132	0.979	-1.44	8	-0.34	0.367	6425	0.91	0.633	11620	0.944
GPR108	-5.76	8	-1.47	0.0708	914	0.939	0.929	17131	0.979	-1.62	8	-0.4	0.346	5953	0.91	0.654	12092	0.944
KIF1A	-5.76	8	-1.47	0.0708	915	0.939	0.929	17130	0.979	-2.07	8	-0.54	0.295	4834	0.91	0.705	13211	0.944
USP22	-5.76	8	-1.47	0.0709	916	0.939	0.929	17129	0.979	0.61	8	0.31	0.623	12330	0.91	0.377	5715	0.944
KLHL4	-5.75	8	-1.47	0.0713	917	0.939	0.929	17128	0.978	-4.62	8	-1.35	0.0887	910	0.91	0.911	17135	0.96
PGD	-5.74	8	-1.47	0.0713	918	0.939	0.929	17127	0.978	2.33	8	0.85	0.804	15567	0.931	0.196	2478	0.944
DCAF12L2	-5.74	8	-1.47	0.0714	919	0.939	0.929	17126	0.978	-4.39	8	-1.27	0.101	1094	0.91	0.899	16951	0.956
WBP1L	-5.74	8	-1.46	0.0715	920	0.939	0.929	17125	0.978	-3.64	8	-1.04	0.15	1883	0.91	0.85	16162	0.949
UBE2S	-5.74	8	-1.46	0.0715	921	0.939	0.928	17124	0.978	-2.76	8	-0.76	0.224	3256	0.91	0.776	14789	0.944
KRTAP23-1	-5.74	8	-1.46	0.0716	922	0.939	0.928	17123	0.978	-4.94	8	-1.45	0.0735	715	0.91	0.927	17330	0.965
COL13A1	-5.74	8	-1.46	0.0716	923	0.939	0.928	17122	0.978	-3.57	8	-1.01	0.156	1978	0.91	0.844	16067	0.948
SPACA7	-5.73	8	-1.46	0.0717	924	0.939	0.928	17121	0.978	-2.79	8	-0.77	0.221	3193	0.91	0.779	14852	0.944
NSD2	-5.73	8	-1.46	0.0717	925	0.939	0.928	17120	0.978	-7.9	8	-2.39	0.00849	78	0.91	0.992	17967	0.996
HSD11B2	-5.73	8	-1.46	0.0719	926	0.939	0.928	17119	0.978	-0.35	8	0.01	0.502	9602	0.91	0.498	8443	0.944
SOX9	-5.73	8	-1.46	0.072	927	0.939	0.928	17118	0.978	-6.01	8	-1.79	0.0368	312	0.91	0.963	17733	0.98
OR51B6	-5.72	8	-1.46	0.0721	928	0.939	0.928	17117	0.978	-4.74	8	-1.39	0.083	833	0.91	0.917	17212	0.961
DNAJC21	-5.72	8	-1.46	0.0722	929	0.939	0.928	17116	0.978	-4.92	8	-1.44	0.0747	728	0.91	0.925	17317	0.964
MRPL44	-5.72	8	-1.46	0.0724	930	0.939	0.928	17115	0.978	-0.68	8	-0.1	0.46	8646	0.91	0.54	9399	0.944
SERPINB9	-5.71	8	-1.46	0.0724	931	0.939	0.928	17114	0.978	0.61	8	0.31	0.622	12323	0.91	0.378	5722	0.944
FADS2	-5.71	8	-1.46	0.0725	932	0.939	0.928	17113	0.978	-6.57	8	-1.96	0.0247	209	0.91	0.975	17836	0.987
DUT	-4.95	6	-1.46	0.0725	933	0.939	0.927	17112	0.978	3.41	8	1.2	0.885	16667	0.958	0.115	1378	0.944
COA8	-4.04	4	-1.46	0.0726	934	0.939	0.927	17111	0.978	-0.47	4	-0.09	0.463	8715	0.91	0.537	9330	0.944
ASIP	-5.71	8	-1.46	0.0726	935	0.939	0.927	17110	0.978	-5.87	8	-1.75	0.0405	354	0.91	0.96	17691	0.979
CDC37L1	-5.71	8	-1.46	0.0727	936	0.939	0.927	17109	0.978	-0.93	8	-0.18	0.429	7882	0.91	0.571	10163	0.944
ABCE1	-4.03	4	-1.46	0.0728	937	0.939	0.927	17108	0.978	-1.79	4	-0.69	0.247	3728	0.91	0.753	14317	0.944
THOP1	-5.7	8	-1.46	0.0728	938	0.939	0.927	17107	0.978	-3.52	8	-1	0.159	2024	0.91	0.841	16021	0.947
AP1B1	-5.7	8	-1.45	0.073	939	0.939	0.927	17106	0.978	-5.71	8	-1.69	0.0453	396	0.91	0.955	17649	0.976
NKD2	-5.7	8	-1.45	0.0731	940	0.939	0.927	17105	0.978	-6.69	8	-2	0.0226	186	0.91	0.977	17859	0.988
RP9	-5.7	8	-1.45	0.0731	941	0.939	0.927	17104	0.978	-7.03	8	-2.11	0.0173	134	0.91	0.983	17911	0.99
PROX1	-5.69	8	-1.45	0.0733	942	0.939	0.927	17103	0.978	-1.85	8	-0.47	0.32	5356	0.91	0.68	12689	0.944
MICAL1	-5.69	8	-1.45	0.0733	943	0.939	0.927	17102	0.978	-3.71	8	-1.06	0.145	1799	0.91	0.855	16246	0.949
MOV10	-5.69	8	-1.45	0.0735	944	0.939	0.927	17101	0.978	-3.67	8	-1.05	0.148	1840	0.91	0.852	16205	0.949
NDUFB5	-5.68	8	-1.45	0.0738	945	0.939	0.926	17100	0.977	-4.93	8	-1.45	0.0741	721	0.91	0.926	17324	0.964
GBP1	-5.68	8	-1.45	0.0738	946	0.939	0.926	17099	0.977	-5.33	8	-1.57	0.0579	546	0.91	0.942	17499	0.971
HPRT1	-5.68	8	-1.45	0.0738	947	0.939	0.926	17098	0.977	-1.98	8	-0.51	0.305	5035	0.91	0.695	13010	0.944
CDC42EP4	-5.68	8	-1.45	0.0738	948	0.939	0.926	17097	0.977	-2.51	8	-0.68	0.249	3785	0.91	0.751	14260	0.944
WDR62	-5.68	8	-1.45	0.0738	949	0.939	0.926	17096	0.977	-9.32	8	-2.84	0.00227	36	0.91	0.998	18009	1
MRPL49	-5.67	8	-1.45	0.0739	950	0.939	0.926	17095	0.977	-1.5	8	-0.36	0.36	6258	0.91	0.64	11787	0.944
COX5A	-5.67	8	-1.45	0.074	951	0.939	0.926	17094	0.977	-3.82	8	-1.09	0.137	1654	0.91	0.863	16391	0.95
IRF8	-5.67	8	-1.45	0.074	952	0.939	0.926	17093	0.977	-2	8	-0.52	0.303	4991	0.91	0.697	13054	0.944
RARA	-5.67	8	-1.45	0.0741	953	0.939	0.926	17092	0.977	-9.45	8	-2.88	0.002	35	0.91	0.998	18010	1
PNISR	-5.67	8	-1.45	0.0741	954	0.939	0.926	17091	0.977	-1.96	8	-0.5	0.307	5082	0.91	0.693	12963	0.944
CDK16	-5.67	8	-1.45	0.0742	955	0.939	0.926	17090	0.977	-0.72	8	-0.11	0.455	8513	0.91	0.545	9532	0.944
SMTNL2	-5.66	8	-1.44	0.0743	956	0.939	0.926	17089	0.977	-4.61	8	-1.35	0.0893	923	0.91	0.911	17122	0.96
SERTM1	-5.66	8	-1.44	0.0745	957	0.939	0.926	17088	0.977	-3.93	8	-1.13	0.13	1540	0.91	0.87	16505	0.951
GGACT	-5.66	8	-1.44	0.0745	958	0.939	0.926	17087	0.977	-7.64	8	-2.31	0.0106	91	0.91	0.989	17954	0.994
CHRAC1	-5.65	8	-1.44	0.0746	959	0.939	0.925	17086	0.977	-0.55	8	-0.06	0.477	9054	0.91	0.523	8991	0.944
CD300LF	-5.65	8	-1.44	0.0748	960	0.939	0.925	17085	0.977	-3.05	8	-0.85	0.198	2732	0.91	0.802	15313	0.944
ADORA3	-5.65	8	-1.44	0.0749	961	0.939	0.925	17084	0.977	-3.62	8	-1.03	0.151	1903	0.91	0.849	16142	0.949
AC091801.1	-5.65	8	-1.44	0.0749	962	0.939	0.925	17083	0.977	-1.83	8	-0.46	0.321	5389	0.91	0.679	12656	0.944
MED22	-5.65	8	-1.44	0.075	963	0.939	0.925	17082	0.977	-1.76	8	-0.44	0.33	5600	0.91	0.67	12445	0.944
PHF3	-5.65	8	-1.44	0.075	964	0.939	0.925	17081	0.977	-4.85	8	-1.42	0.0777	767	0.91	0.922	17278	0.963
ARHGEF17	-5.64	8	-1.44	0.075	965	0.939	0.925	17080	0.977	-3.78	8	-1.08	0.14	1701	0.91	0.86	16344	0.95
SATB2	-5.64	8	-1.44	0.0751	966	0.939	0.925	17079	0.977	-2.42	8	-0.65	0.258	3980	0.91	0.742	14065	0.944
ZC3H14	-5.64	8	-1.44	0.0751	967	0.939	0.925	17078	0.977	-10.6	8	-3.24	0.000591	24	0.444	0.999	18021	1
TRIP13	-5.64	8	-1.44	0.0752	968	0.939	0.925	17077	0.977	-4.03	8	-1.16	0.123	1408	0.91	0.877	16637	0.951
OR51A4	-2.82	2	-1.44	0.0752	969	0.939	0.925	17076	0.977	-0.9	2	-0.45	0.325	5473	0.91	0.675	12572	0.944
CRACR2B	-5.64	8	-1.44	0.0753	970	0.939	0.925	17075	0.977	-4.55	8	-1.33	0.0923	972	0.91	0.908	17073	0.959
VWC2	-5.64	8	-1.44	0.0753	971	0.939	0.925	17074	0.977	-1.32	8	-0.3	0.381	6771	0.91	0.619	11274	0.944
CFAP58	-5.63	8	-1.44	0.0754	972	0.939	0.925	17073	0.977	-4.31	8	-1.25	0.106	1153	0.91	0.894	16892	0.955
FOXRED2	-5.63	8	-1.44	0.0755	973	0.939	0.924	17072	0.977	-1.88	8	-0.48	0.316	5267	0.91	0.684	12778	0.944
ZNF365	-5.63	8	-1.44	0.0755	974	0.939	0.924	17071	0.977	-2.59	8	-0.7	0.24	3576	0.91	0.76	14469	0.944
NDUFA6	-5.63	8	-1.44	0.0756	975	0.939	0.924	17070	0.977	-4.18	8	-1.21	0.113	1262	0.91	0.887	16783	0.953
UQCRFS1	-5.63	8	-1.44	0.0756	976	0.939	0.924	17069	0.977	-7.85	8	-2.37	0.00884	79	0.91	0.991	17966	0.995
SRSF7	-5.63	8	-1.43	0.0757	977	0.939	0.924	17068	0.977	-12.81	8	-3.95	3.99e-05	11	0.0654	1	18034	1
PLK3	-5.63	8	-1.43	0.0758	978	0.939	0.924	17067	0.977	-3.69	8	-1.05	0.146	1814	0.91	0.854	16231	0.949
PRSS50	-5.62	8	-1.43	0.0758	979	0.939	0.924	17066	0.977	-1.75	8	-0.44	0.331	5618	0.91	0.669	12427	0.944
INPP5A	-5.62	8	-1.43	0.0758	980	0.939	0.924	17065	0.977	3.53	8	1.24	0.892	16759	0.961	0.108	1286	0.944
RPP25	-5.62	8	-1.43	0.0758	981	0.939	0.924	17064	0.977	-1.84	8	-0.47	0.321	5374	0.91	0.679	12671	0.944
ZSWIM4	-5.62	8	-1.43	0.0759	982	0.939	0.924	17063	0.977	-1.55	8	-0.37	0.354	6141	0.91	0.646	11904	0.944
CCDC105	-5.62	8	-1.43	0.076	983	0.939	0.924	17062	0.977	-3.86	8	-1.11	0.134	1603	0.91	0.866	16442	0.95
TBC1D1	-5.61	8	-1.43	0.0763	984	0.939	0.924	17061	0.977	-3.59	8	-1.02	0.153	1945	0.91	0.847	16100	0.949
CLK3	-5.61	8	-1.43	0.0764	985	0.939	0.924	17060	0.977	-1.09	8	-0.23	0.409	7421	0.91	0.591	10624	0.944
NANOS1	-5.61	8	-1.43	0.0764	986	0.939	0.924	17059	0.977	-1.95	8	-0.5	0.308	5106	0.91	0.692	12939	0.944
SH2D6	-5.61	8	-1.43	0.0765	987	0.939	0.924	17058	0.977	-5.06	8	-1.49	0.0687	655	0.91	0.931	17390	0.966
NANS	-5.6	8	-1.43	0.0765	988	0.939	0.923	17057	0.977	-3.48	8	-0.99	0.162	2070	0.91	0.838	15975	0.947
VPS41	-5.6	8	-1.43	0.0766	989	0.939	0.923	17056	0.977	-1.81	8	-0.46	0.324	5454	0.91	0.676	12591	0.944
SENP1	-5.6	8	-1.43	0.0766	990	0.939	0.923	17055	0.977	-2.8	8	-0.77	0.22	3171	0.91	0.78	14874	0.944
LRIG1	-5.6	8	-1.43	0.0766	991	0.939	0.923	17054	0.977	-5.1	8	-1.5	0.0671	636	0.91	0.933	17409	0.967
QRICH1	-5.6	8	-1.43	0.0767	992	0.939	0.923	17053	0.977	-3.65	8	-1.04	0.149	1862	0.91	0.851	16183	0.949
HID1	-5.6	8	-1.43	0.0769	993	0.939	0.923	17052	0.977	-1.88	8	-0.48	0.316	5273	0.91	0.684	12772	0.944
C4BPB	-5.59	8	-1.43	0.077	994	0.939	0.923	17051	0.977	1.21	8	0.5	0.692	13690	0.912	0.308	4355	0.944
TMEM150C	-5.59	8	-1.43	0.077	995	0.939	0.923	17050	0.977	-3.71	8	-1.06	0.145	1795	0.91	0.855	16250	0.95
RAB8B	-5.59	8	-1.43	0.077	996	0.939	0.923	17049	0.977	-3.69	8	-1.05	0.146	1824	0.91	0.854	16221	0.949
RAI1	-5.59	8	-1.42	0.0771	997	0.939	0.923	17048	0.977	-6.85	8	-2.05	0.02	159	0.91	0.98	17886	0.989
PHC2	-5.59	8	-1.42	0.0772	998	0.939	0.923	17047	0.977	-1.34	8	-0.31	0.379	6713	0.91	0.621	11332	0.944
MAP1A	-5.59	8	-1.42	0.0772	999	0.939	0.923	17046	0.977	-3.05	8	-0.85	0.198	2731	0.91	0.802	15314	0.944
LRP3	-5.59	8	-1.42	0.0773	1000	0.939	0.923	17045	0.977	-7.26	8	-2.19	0.0144	122	0.91	0.986	17923	0.992
CKAP5	-5.22	7	-1.42	0.0773	1001	0.939	0.923	17044	0.977	2.46	7	0.95	0.829	15942	0.939	0.171	2103	0.944
PTGES	-5.58	8	-1.42	0.0774	1002	0.939	0.923	17043	0.977	-0.58	8	-0.07	0.474	8967	0.91	0.526	9078	0.944
SFTPA2	-3.95	4	-1.42	0.0774	1003	0.939	0.923	17042	0.977	-3.27	4	-1.35	0.0887	911	0.91	0.911	17134	0.96
OR52H1	-5.58	8	-1.42	0.0774	1004	0.939	0.923	17041	0.977	-2.01	8	-0.52	0.302	4969	0.91	0.698	13076	0.944
ZFAND3	-5.58	8	-1.42	0.0774	1005	0.939	0.923	17040	0.977	-4.08	8	-1.18	0.119	1368	0.91	0.881	16677	0.952
SMS	-5.58	8	-1.42	0.0774	1006	0.939	0.923	17039	0.977	-6.57	8	-1.97	0.0246	207	0.91	0.975	17838	0.987
GAL3ST2	-5.57	8	-1.42	0.0778	1007	0.939	0.922	17038	0.977	-1.84	8	-0.47	0.32	5370	0.91	0.68	12675	0.944
CUL3	-5.57	8	-1.42	0.078	1008	0.939	0.922	17037	0.977	7.39	8	2.46	0.993	17756	1	0.0069	289	0.431
XRCC2	-5.57	8	-1.42	0.078	1009	0.939	0.922	17036	0.977	-1.3	8	-0.29	0.384	6834	0.91	0.616	11211	0.944
HOXD13	-5.57	8	-1.42	0.0781	1010	0.939	0.922	17035	0.977	-3.51	8	-1	0.159	2036	0.91	0.841	16009	0.947
CNTLN	-5.56	8	-1.42	0.0782	1011	0.939	0.922	17034	0.976	-8.19	8	-2.48	0.00655	64	0.91	0.993	17981	0.997
ZRANB1	-5.56	8	-1.42	0.0782	1012	0.939	0.922	17033	0.976	-5.54	8	-1.64	0.0507	462	0.91	0.949	17583	0.974
PLA2G2C	-5.56	8	-1.42	0.0782	1013	0.939	0.922	17032	0.976	-1.83	8	-0.46	0.322	5397	0.91	0.678	12648	0.944
PNPLA8	-5.56	8	-1.42	0.0784	1014	0.939	0.922	17031	0.976	0.08	8	0.14	0.557	10900	0.91	0.443	7145	0.944
AURKC	-5.55	8	-1.41	0.0785	1015	0.939	0.921	17030	0.976	-2.21	8	-0.58	0.28	4488	0.91	0.72	13557	0.944
ANKLE1	-5.55	8	-1.41	0.0785	1016	0.939	0.921	17029	0.976	-2.77	8	-0.76	0.223	3236	0.91	0.777	14809	0.944
OR1L4	-5.55	8	-1.41	0.0786	1017	0.939	0.921	17028	0.976	-0.59	8	-0.07	0.473	8932	0.91	0.527	9113	0.944
GPX1	-5.55	8	-1.41	0.0787	1018	0.939	0.921	17027	0.976	-2.69	8	-0.73	0.231	3382	0.91	0.769	14663	0.944
FLG2	-5.55	8	-1.41	0.0788	1019	0.939	0.921	17026	0.976	-1.18	8	-0.26	0.398	7182	0.91	0.602	10863	0.944
TUBA3C	-3.92	4	-1.41	0.0788	1020	0.939	0.921	17025	0.976	-0.24	4	0.01	0.504	9636	0.91	0.496	8409	0.944
CDK6	-5.55	8	-1.41	0.0788	1021	0.939	0.921	17024	0.976	-3.93	8	-1.13	0.129	1529	0.91	0.871	16516	0.951
IL17D	-5.55	8	-1.41	0.0788	1022	0.939	0.921	17023	0.976	-4.29	8	-1.24	0.107	1169	0.91	0.893	16876	0.955
ZMAT2	-5.55	8	-1.41	0.0788	1023	0.939	0.921	17022	0.976	-4.13	8	-1.19	0.117	1312	0.91	0.883	16733	0.952
INPPL1	-5.54	8	-1.41	0.0789	1024	0.939	0.921	17021	0.976	-1.64	8	-0.4	0.343	5902	0.91	0.657	12143	0.944
NIPBL	-5.54	8	-1.41	0.079	1025	0.939	0.921	17020	0.976	-1.98	8	-0.51	0.304	5017	0.91	0.696	13028	0.944
HAL	-5.54	8	-1.41	0.079	1026	0.939	0.921	17019	0.976	-1.86	8	-0.47	0.318	5327	0.91	0.682	12718	0.944
NFKBIE	-5.53	8	-1.41	0.0794	1027	0.939	0.921	17018	0.976	1.14	8	0.48	0.684	13551	0.911	0.316	4494	0.944
SCAPER	-5.53	8	-1.41	0.0796	1028	0.939	0.92	17017	0.976	2.67	8	0.96	0.832	15993	0.939	0.168	2052	0.944
TMEM164	-5.52	8	-1.41	0.0797	1029	0.939	0.92	17016	0.976	-4.11	8	-1.19	0.118	1338	0.91	0.882	16707	0.952
POLR2A	-5.52	8	-1.41	0.0797	1030	0.939	0.92	17015	0.976	-6.34	8	-1.89	0.0293	253	0.91	0.971	17792	0.984
P3H4	-5.52	8	-1.41	0.08	1031	0.939	0.92	17014	0.976	-0.02	8	0.11	0.544	10609	0.91	0.456	7436	0.944
RPF2	-5.52	8	-1.4	0.08	1032	0.939	0.92	17013	0.976	-3.25	6	-1.07	0.142	1744	0.91	0.858	16301	0.95
TBC1D4	-5.51	8	-1.4	0.0801	1033	0.939	0.92	17012	0.976	0.42	8	0.25	0.598	11818	0.91	0.402	6227	0.944
ZCCHC12	-5.51	8	-1.4	0.0802	1034	0.939	0.92	17011	0.976	-1.24	8	-0.28	0.391	6987	0.91	0.609	11058	0.944
H4C1	-5.51	8	-1.4	0.0802	1035	0.939	0.92	17010	0.976	-4.75	8	-1.39	0.0822	818	0.91	0.918	17227	0.961
SPHK1	-5.51	8	-1.4	0.0802	1036	0.939	0.92	17009	0.976	-5.11	8	-1.5	0.0664	628	0.91	0.934	17417	0.967
EP400P1	-5.51	8	-1.4	0.0803	1037	0.939	0.92	17008	0.976	-3.02	8	-0.84	0.201	2789	0.91	0.799	15256	0.944
WIPF3	-5.51	8	-1.4	0.0804	1038	0.939	0.92	17007	0.976	-7.73	8	-2.33	0.00981	83	0.91	0.99	17962	0.995
CTCF	-5.15	7	-1.4	0.0805	1039	0.939	0.919	17006	0.976	-2.18	8	-0.57	0.283	4556	0.91	0.717	13489	0.944
CAMK2N2	-5.5	8	-1.4	0.0806	1040	0.939	0.919	17005	0.976	-0.3	8	0.02	0.509	9760	0.91	0.491	8285	0.944
SGPP2	-5.5	8	-1.4	0.0807	1041	0.939	0.919	17004	0.976	-2.03	8	-0.52	0.3	4925	0.91	0.7	13120	0.944
HNRNPU	-5.5	8	-1.4	0.0807	1042	0.939	0.919	17003	0.976	-1.92	8	-0.49	0.311	5149	0.91	0.689	12896	0.944
GBP7	-5.5	8	-1.4	0.0808	1043	0.939	0.919	17002	0.975	-4.59	8	-1.34	0.0902	944	0.91	0.91	17101	0.96
INPP5B	-5.49	8	-1.4	0.0811	1044	0.939	0.919	17001	0.975	1.48	8	0.59	0.722	14180	0.918	0.278	3865	0.944
BPIFA2	-5.49	8	-1.4	0.0811	1045	0.939	0.919	17000	0.975	-2.99	8	-0.83	0.203	2837	0.91	0.797	15208	0.944
DCP2	-5.49	8	-1.4	0.0811	1046	0.939	0.919	16999	0.975	0.52	8	0.28	0.612	12115	0.91	0.388	5930	0.944
RAI2	-5.48	8	-1.4	0.0813	1047	0.939	0.919	16998	0.975	-1.24	8	-0.28	0.392	7009	0.91	0.608	11036	0.944
GOPC	-5.48	8	-1.4	0.0814	1048	0.939	0.919	16997	0.975	-2.99	8	-0.83	0.203	2838	0.91	0.797	15207	0.944
WASF3	-5.48	8	-1.4	0.0814	1049	0.939	0.919	16996	0.975	-0.33	8	0.01	0.505	9668	0.91	0.495	8377	0.944
ADH4	-5.48	8	-1.4	0.0814	1050	0.939	0.919	16995	0.975	-2.52	8	-0.68	0.248	3754	0.91	0.752	14291	0.944
NTN1	-5.48	8	-1.4	0.0815	1051	0.939	0.918	16994	0.975	-1.91	8	-0.49	0.313	5185	0.91	0.687	12860	0.944
HNRNPH3	-5.48	8	-1.39	0.0815	1052	0.939	0.918	16993	0.975	1.77	8	0.68	0.751	14712	0.921	0.249	3333	0.944
GIPC1	-5.48	8	-1.39	0.0816	1053	0.939	0.918	16992	0.975	-5.43	8	-1.61	0.0542	503	0.91	0.946	17542	0.973
TOMM20	-5.48	8	-1.39	0.0816	1054	0.939	0.918	16991	0.975	-6.28	8	-1.87	0.0305	272	0.91	0.97	17773	0.984
ETV5	-5.47	8	-1.39	0.0818	1055	0.939	0.918	16990	0.975	0.35	8	0.23	0.59	11622	0.91	0.41	6423	0.944
TWIST2	-5.47	8	-1.39	0.0818	1056	0.939	0.918	16989	0.975	-3.02	8	-0.84	0.2	2770	0.91	0.8	15275	0.944
OLFM2	-5.47	8	-1.39	0.0818	1057	0.939	0.918	16988	0.975	-3.03	8	-0.84	0.2	2760	0.91	0.8	15285	0.944
CCDC122	-4.74	6	-1.39	0.0819	1058	0.939	0.918	16987	0.975	-3.25	6	-1.07	0.142	1742	0.91	0.858	16303	0.95
FAM207A	-5.47	8	-1.39	0.0819	1059	0.939	0.918	16986	0.975	-4.33	8	-1.26	0.104	1138	0.91	0.896	16907	0.956
TSSK4	-5.47	8	-1.39	0.082	1060	0.939	0.918	16985	0.975	-1.91	8	-0.49	0.313	5193	0.91	0.687	12852	0.944
OR6K3	-5.46	8	-1.39	0.0821	1061	0.939	0.918	16984	0.975	-2.03	8	-0.53	0.3	4921	0.91	0.7	13124	0.944
SLC12A2	-5.46	8	-1.39	0.0821	1062	0.939	0.918	16983	0.975	-2.71	8	-0.74	0.23	3354	0.91	0.77	14691	0.944
WNT10A	-5.46	8	-1.39	0.0821	1063	0.939	0.918	16982	0.975	-4.49	8	-1.31	0.0958	1011	0.91	0.904	17034	0.958
EVA1B	-5.46	8	-1.39	0.0822	1064	0.939	0.918	16981	0.975	-1.92	8	-0.49	0.311	5147	0.91	0.689	12898	0.944
MISP	-5.46	8	-1.39	0.0822	1065	0.939	0.918	16980	0.975	0.26	8	0.2	0.579	11381	0.91	0.421	6664	0.944
HCN2	-5.46	8	-1.39	0.0823	1066	0.939	0.918	16979	0.975	0.29	8	0.21	0.583	11455	0.91	0.417	6590	0.944
YIPF4	-5.46	8	-1.39	0.0823	1067	0.939	0.918	16978	0.975	-1.53	8	-0.37	0.357	6195	0.91	0.643	11850	0.944
CDC73	-4.73	6	-1.39	0.0824	1068	0.939	0.918	16977	0.975	1.68	6	0.73	0.768	15004	0.924	0.232	3041	0.944
BET1	-4.73	6	-1.39	0.0824	1069	0.939	0.918	16976	0.975	-6.06	6	-2.1	0.0179	137	0.91	0.982	17908	0.99
TRIM55	-5.45	8	-1.39	0.0825	1070	0.939	0.917	16975	0.975	-2.75	8	-0.75	0.226	3287	0.91	0.774	14758	0.944
HMGN5	-4.72	6	-1.39	0.0827	1071	0.939	0.917	16974	0.975	-2.98	6	-0.97	0.165	2130	0.91	0.835	15915	0.947
ZNF619	-5.45	8	-1.39	0.0827	1072	0.939	0.917	16973	0.975	-2.36	8	-0.63	0.264	4095	0.91	0.736	13950	0.944
CD247	-5.45	8	-1.39	0.0828	1073	0.939	0.917	16972	0.975	-0.74	8	-0.12	0.453	8475	0.91	0.547	9570	0.944
TFEC	-5.45	8	-1.39	0.0828	1074	0.939	0.917	16971	0.975	-5.75	8	-1.71	0.044	385	0.91	0.956	17660	0.977
NAE1	-5.45	8	-1.39	0.0828	1075	0.939	0.917	16970	0.975	-0.81	7	-0.16	0.438	8077	0.91	0.562	9968	0.944
HNRNPH2	-5.44	8	-1.39	0.0829	1076	0.939	0.917	16969	0.975	-0.35	8	0.01	0.502	9591	0.91	0.498	8454	0.944
MRS2	-5.44	8	-1.39	0.083	1077	0.939	0.917	16968	0.975	-0.11	8	0.08	0.533	10371	0.91	0.467	7674	0.944
P2RX4	-5.44	8	-1.38	0.0831	1078	0.939	0.917	16967	0.975	-4.75	8	-1.39	0.0825	826	0.91	0.917	17219	0.961
ENTPD3	-5.44	8	-1.38	0.0831	1079	0.939	0.917	16966	0.975	0.16	8	0.17	0.566	11116	0.91	0.434	6929	0.944
RIOK2	-4.29	5	-1.38	0.0835	1080	0.939	0.916	16965	0.975	-6.87	5	-2.64	0.00419	51	0.91	0.996	17994	0.999
TIMM8B	-5.43	8	-1.38	0.0835	1081	0.939	0.916	16964	0.975	-2.74	8	-0.75	0.227	3301	0.91	0.773	14744	0.944
MED29	-5.43	8	-1.38	0.0837	1082	0.939	0.916	16963	0.975	-3.12	8	-0.87	0.192	2619	0.91	0.808	15426	0.944
MGAT1	-5.42	8	-1.38	0.0837	1083	0.939	0.916	16962	0.975	-1.38	8	-0.32	0.375	6605	0.91	0.625	11440	0.944
CACNB2	-5.42	8	-1.38	0.0838	1084	0.939	0.916	16961	0.975	-2.55	8	-0.69	0.245	3671	0.91	0.755	14374	0.944
ATRN	-5.42	8	-1.38	0.084	1085	0.939	0.916	16960	0.975	-5.35	8	-1.58	0.0573	539	0.91	0.943	17506	0.972
FAM89A	-5.42	8	-1.38	0.084	1086	0.939	0.916	16959	0.975	-4.76	8	-1.39	0.082	816	0.91	0.918	17229	0.961
PTPDC1	-5.42	8	-1.38	0.0841	1087	0.939	0.916	16958	0.975	-4.82	8	-1.41	0.0794	789	0.91	0.921	17256	0.963
OR51G1	-5.41	8	-1.38	0.0843	1088	0.939	0.916	16957	0.974	-1.37	8	-0.32	0.376	6629	0.91	0.624	11416	0.944
PDE7B	-5.41	8	-1.38	0.0843	1089	0.939	0.916	16956	0.974	-1.75	8	-0.44	0.331	5611	0.91	0.669	12434	0.944
NRN1L	-5.41	8	-1.38	0.0844	1090	0.939	0.916	16955	0.974	-2.64	8	-0.72	0.236	3494	0.91	0.764	14551	0.944
CDK5R2	-5.41	8	-1.38	0.0844	1091	0.939	0.916	16954	0.974	-2.28	8	-0.6	0.273	4299	0.91	0.727	13746	0.944
ANGPT4	-5.41	8	-1.38	0.0845	1092	0.939	0.916	16953	0.974	-1.76	8	-0.44	0.33	5601	0.91	0.67	12444	0.944
SYNGAP1	-5.4	8	-1.37	0.0847	1093	0.939	0.915	16952	0.974	0.59	8	0.31	0.62	12286	0.91	0.38	5759	0.944
MATK	-5.4	8	-1.37	0.0847	1094	0.939	0.915	16951	0.974	3	8	1.07	0.857	16341	0.947	0.143	1704	0.944
ZSWIM9	-5.39	8	-1.37	0.085	1095	0.939	0.915	16950	0.974	-7.95	8	-2.4	0.00813	74	0.91	0.992	17971	0.996
FLII	-5.39	8	-1.37	0.085	1096	0.939	0.915	16949	0.974	-4.55	8	-1.33	0.0923	973	0.91	0.908	17072	0.959
OR2L13	-5.39	8	-1.37	0.0852	1097	0.939	0.915	16948	0.974	-2.66	8	-0.73	0.234	3436	0.91	0.766	14609	0.944
MAP1B	-5.39	8	-1.37	0.0852	1098	0.939	0.915	16947	0.974	-2.55	8	-0.69	0.245	3679	0.91	0.755	14366	0.944
SOX18	-5.38	8	-1.37	0.0854	1099	0.939	0.915	16946	0.974	-2.59	8	-0.7	0.241	3584	0.91	0.759	14461	0.944
SMPD2	-5.38	8	-1.37	0.0857	1100	0.939	0.914	16945	0.974	0.6	8	0.31	0.621	12296	0.91	0.379	5749	0.944
CHAC2	-5.38	8	-1.37	0.0857	1101	0.939	0.914	16944	0.974	-4.83	8	-1.41	0.0787	783	0.91	0.921	17262	0.963
XK	-5.37	8	-1.37	0.0858	1102	0.939	0.914	16943	0.974	-4.57	8	-1.33	0.0916	962	0.91	0.908	17083	0.959
ICOS	-5.37	8	-1.37	0.0858	1103	0.939	0.914	16942	0.974	-3.3	8	-0.93	0.177	2330	0.91	0.823	15715	0.945
CEP290	-5.37	8	-1.37	0.0859	1104	0.939	0.914	16941	0.974	-5.34	8	-1.58	0.0575	542	0.91	0.942	17503	0.972
SRSF3	-5.37	8	-1.37	0.086	1105	0.939	0.914	16940	0.974	-6.09	8	-1.81	0.035	297	0.91	0.965	17748	0.981
NAPRT	-5.37	8	-1.37	0.086	1106	0.939	0.914	16939	0.974	-2.25	8	-0.6	0.275	4353	0.91	0.725	13692	0.944
SMIM15	-4.65	6	-1.37	0.086	1107	0.939	0.914	16938	0.974	-4.46	6	-1.51	0.065	615	0.91	0.935	17430	0.968
PITX1	-5.37	8	-1.37	0.0861	1108	0.939	0.914	16937	0.974	-4.51	8	-1.31	0.0946	996	0.91	0.905	17049	0.958
PLEKHS1	-5.36	8	-1.36	0.0863	1109	0.939	0.914	16936	0.973	-0.78	8	-0.13	0.449	8370	0.91	0.551	9675	0.944
ACAA2	-5.36	8	-1.36	0.0864	1110	0.939	0.914	16935	0.973	-2.19	8	-0.58	0.282	4540	0.91	0.718	13505	0.944
PPP4R1L	-5.36	8	-1.36	0.0865	1111	0.939	0.914	16934	0.973	-5.09	8	-1.5	0.0672	640	0.91	0.933	17405	0.967
GTF2A2	-4.64	6	-1.36	0.0865	1112	0.939	0.913	16933	0.973	0.76	7	0.38	0.646	12799	0.91	0.354	5246	0.944
ANKRA2	-5.36	8	-1.36	0.0865	1113	0.939	0.913	16932	0.973	-1.7	8	-0.42	0.336	5741	0.91	0.664	12304	0.944
PCYOX1L	-5.36	8	-1.36	0.0866	1114	0.939	0.913	16931	0.973	-3.92	8	-1.13	0.13	1541	0.91	0.87	16504	0.951
ZNF526	-5.35	8	-1.36	0.0866	1115	0.939	0.913	16930	0.973	-6.44	8	-1.93	0.0271	237	0.91	0.973	17808	0.986
CRIP1	-5.35	8	-1.36	0.0866	1116	0.939	0.913	16929	0.973	-5.3	8	-1.56	0.0591	554	0.91	0.941	17491	0.971
RBMXL2	-5.35	8	-1.36	0.0867	1117	0.939	0.913	16928	0.973	-3.57	8	-1.02	0.155	1964	0.91	0.845	16081	0.948
KIF3C	-5.35	8	-1.36	0.0868	1118	0.939	0.913	16927	0.973	-6.77	8	-2.03	0.0212	172	0.91	0.979	17873	0.988
COMP	-5.35	8	-1.36	0.0868	1119	0.939	0.913	16926	0.973	-0.68	8	-0.1	0.46	8644	0.91	0.54	9401	0.944
SHPRH	-5.35	8	-1.36	0.0869	1120	0.939	0.913	16925	0.973	-3.87	8	-1.11	0.134	1602	0.91	0.866	16443	0.95
SOWAHD	-5.35	8	-1.36	0.0869	1121	0.939	0.913	16924	0.973	-4.97	8	-1.46	0.0723	700	0.91	0.928	17345	0.965
C3orf35	-5.35	8	-1.36	0.0869	1122	0.939	0.913	16923	0.973	-2.06	8	-0.53	0.296	4862	0.91	0.704	13183	0.944
DIO3	-5.35	8	-1.36	0.087	1123	0.939	0.913	16922	0.973	-4.06	8	-1.17	0.121	1386	0.91	0.879	16659	0.952
HEY2	-5.34	8	-1.36	0.087	1124	0.939	0.913	16921	0.973	-3.39	8	-0.96	0.169	2194	0.91	0.831	15851	0.945
SERPINF1	-5.34	8	-1.36	0.0871	1125	0.939	0.913	16920	0.973	-2.38	8	-0.64	0.262	4061	0.91	0.738	13984	0.944
MFSD12	-5.34	8	-1.36	0.0871	1126	0.939	0.913	16919	0.973	-3.66	8	-1.04	0.148	1846	0.91	0.852	16199	0.949
DYNC2H1	-5.34	8	-1.36	0.0872	1127	0.939	0.913	16918	0.973	-4.73	8	-1.38	0.0832	838	0.91	0.917	17207	0.961
EFHC1	-5.33	8	-1.36	0.0875	1128	0.939	0.913	16917	0.973	-2.83	8	-0.78	0.217	3125	0.91	0.783	14920	0.944
NIT1	-5.33	8	-1.36	0.0876	1129	0.939	0.912	16916	0.973	-3.72	8	-1.06	0.144	1782	0.91	0.856	16263	0.95
TIMM50	-5.33	8	-1.36	0.0877	1130	0.939	0.912	16915	0.973	-1.44	8	-0.34	0.368	6442	0.91	0.632	11603	0.944
TMEM126A	-5.33	8	-1.35	0.0878	1131	0.939	0.912	16914	0.973	-5.49	8	-1.62	0.0522	480	0.91	0.948	17565	0.974
FSCB	-5.33	8	-1.35	0.0878	1132	0.939	0.912	16913	0.973	-1.62	8	-0.4	0.346	5968	0.91	0.654	12077	0.944
INO80D	-5.33	8	-1.35	0.0878	1133	0.939	0.912	16912	0.973	4.41	8	1.51	0.935	17194	0.981	0.0649	851	0.944
TTK	-5.32	8	-1.35	0.0881	1134	0.939	0.912	16911	0.973	-4.92	8	-1.44	0.0744	725	0.91	0.926	17320	0.964
OR51G2	-5.32	8	-1.35	0.0881	1135	0.939	0.912	16910	0.973	-4.01	8	-1.16	0.124	1426	0.91	0.876	16619	0.951
UBN1	-5.32	8	-1.35	0.0882	1136	0.939	0.912	16909	0.973	-5.55	8	-1.64	0.0503	457	0.91	0.95	17588	0.974
BCL6B	-5.32	8	-1.35	0.0882	1137	0.939	0.912	16908	0.973	-2.47	8	-0.67	0.252	3856	0.91	0.748	14189	0.944
CNOT3	-5.32	8	-1.35	0.0883	1138	0.939	0.912	16907	0.973	-1.67	8	-0.41	0.34	5828	0.91	0.66	12217	0.944
SLC16A11	-5.31	8	-1.35	0.0884	1139	0.939	0.912	16906	0.973	-0.76	8	-0.12	0.451	8417	0.91	0.549	9628	0.944
TRIM46	-5.31	8	-1.35	0.0886	1140	0.939	0.911	16905	0.973	-4.21	8	-1.22	0.111	1235	0.91	0.889	16810	0.954
NDNF	-5.31	8	-1.35	0.0887	1141	0.939	0.911	16904	0.973	-0.24	8	0.04	0.516	9946	0.91	0.484	8099	0.944
CLIC3	-5.31	8	-1.35	0.0887	1142	0.939	0.911	16903	0.973	-0.01	8	0.12	0.546	10650	0.91	0.454	7395	0.944
STX11	-5.3	8	-1.35	0.089	1143	0.939	0.911	16902	0.973	-3.51	8	-1	0.159	2037	0.91	0.841	16008	0.947
IFI16	-5.3	8	-1.35	0.0891	1144	0.939	0.911	16901	0.973	-2.77	8	-0.76	0.224	3241	0.91	0.776	14804	0.944
CMPK1	-5.3	8	-1.35	0.0891	1145	0.939	0.911	16900	0.973	2.02	8	0.76	0.776	15137	0.925	0.224	2908	0.944
SCN1B	-5.29	8	-1.35	0.0892	1146	0.939	0.911	16899	0.973	-5.18	8	-1.52	0.0637	598	0.91	0.936	17447	0.968
CASKIN1	-5.29	8	-1.35	0.0893	1147	0.939	0.911	16898	0.972	-3.61	8	-1.03	0.152	1925	0.91	0.848	16120	0.949
BMF	-5.29	8	-1.34	0.0893	1148	0.939	0.911	16897	0.972	-2.67	8	-0.73	0.233	3426	0.91	0.767	14619	0.944
NLRP3	-5.29	8	-1.34	0.0894	1149	0.939	0.911	16896	0.972	-0.55	8	-0.06	0.477	9038	0.91	0.523	9007	0.944
GUCY1A2	-5.29	8	-1.34	0.0894	1150	0.939	0.911	16895	0.972	-1.82	8	-0.46	0.323	5438	0.91	0.677	12607	0.944
CPTP	-5.28	8	-1.34	0.0896	1151	0.939	0.91	16894	0.972	-0.52	8	-0.05	0.482	9153	0.91	0.518	8892	0.944
FSCN1	-5.28	8	-1.34	0.0896	1152	0.939	0.91	16893	0.972	-5.72	8	-1.7	0.0449	394	0.91	0.955	17651	0.976
NDP	-5.28	8	-1.34	0.0897	1153	0.939	0.91	16892	0.972	-3.6	8	-1.02	0.153	1943	0.91	0.847	16102	0.949
N4BP1	-5.28	8	-1.34	0.0897	1154	0.939	0.91	16891	0.972	-1.35	8	-0.31	0.378	6673	0.91	0.622	11372	0.944
WAS	-5.28	8	-1.34	0.0899	1155	0.939	0.91	16890	0.972	-2.39	8	-0.64	0.261	4041	0.91	0.739	14004	0.944
MRPL16	-5.27	8	-1.34	0.0901	1156	0.939	0.91	16889	0.972	-1.55	8	-0.37	0.354	6129	0.91	0.646	11916	0.944
APOBEC3H	-5.27	8	-1.34	0.0901	1157	0.939	0.91	16888	0.972	-5.99	8	-1.78	0.0374	321	0.91	0.963	17724	0.98
SLC39A13	-5.27	8	-1.34	0.0901	1158	0.939	0.91	16887	0.972	-5.69	8	-1.69	0.0458	402	0.91	0.954	17643	0.976
RTKN	-5.27	8	-1.34	0.0903	1159	0.939	0.91	16886	0.972	-3.76	8	-1.08	0.141	1736	0.91	0.859	16309	0.95
KCNJ3	-5.27	8	-1.34	0.0903	1160	0.939	0.91	16885	0.972	-3.25	8	-0.91	0.181	2408	0.91	0.819	15637	0.945
ZNF319	-5.27	8	-1.34	0.0903	1161	0.939	0.91	16884	0.972	-6.74	8	-2.02	0.0218	176	0.91	0.978	17869	0.988
KCTD20	-5.27	8	-1.34	0.0904	1162	0.939	0.91	16883	0.972	-2.49	8	-0.67	0.251	3824	0.91	0.749	14221	0.944
C16orf47	-5.26	8	-1.34	0.0905	1163	0.939	0.909	16882	0.972	-3.61	8	-1.03	0.152	1926	0.91	0.848	16119	0.949
IGFLR1	-5.26	8	-1.34	0.0906	1164	0.939	0.909	16881	0.972	-4.15	8	-1.2	0.116	1293	0.91	0.884	16752	0.953
MRPL58	-5.26	8	-1.34	0.0907	1165	0.939	0.909	16880	0.972	-1.55	8	-0.37	0.354	6130	0.91	0.646	11915	0.944
SCRN1	-5.25	8	-1.34	0.0909	1166	0.939	0.909	16879	0.972	-3.96	8	-1.14	0.127	1497	0.91	0.873	16548	0.951
KNL1	-5.25	8	-1.33	0.091	1167	0.939	0.909	16878	0.972	0.64	8	0.32	0.626	12398	0.91	0.374	5647	0.944
TMSB4X	-2.62	2	-1.33	0.0912	1168	0.939	0.909	16877	0.972	0.07	2	0.16	0.564	11072	0.91	0.436	6973	0.944
STK35	-5.25	8	-1.33	0.0912	1169	0.939	0.909	16876	0.972	-4.62	8	-1.35	0.0889	915	0.91	0.911	17130	0.96
MCRIP1	-5.25	8	-1.33	0.0913	1170	0.939	0.909	16875	0.972	-5.78	8	-1.72	0.0431	375	0.91	0.957	17670	0.977
CBX1	-5.25	8	-1.33	0.0913	1171	0.939	0.909	16874	0.972	-6.58	8	-1.97	0.0245	203	0.91	0.976	17842	0.987
ZFYVE26	-5.25	8	-1.33	0.0913	1172	0.939	0.909	16873	0.972	-7.11	8	-2.14	0.0163	129	0.91	0.984	17916	0.991
PLA2G4E	-5.24	8	-1.33	0.0913	1173	0.939	0.909	16872	0.972	0.09	8	0.15	0.558	10924	0.91	0.442	7121	0.944
CD3D	-5.24	8	-1.33	0.0917	1174	0.939	0.908	16871	0.971	-0.93	8	-0.18	0.429	7872	0.91	0.571	10173	0.944
TMEM255B	-5.24	8	-1.33	0.0917	1175	0.939	0.908	16870	0.971	-4.5	8	-1.31	0.0953	1005	0.91	0.905	17040	0.958
PER2	-5.24	8	-1.33	0.0918	1176	0.939	0.908	16869	0.971	-2.67	8	-0.73	0.233	3422	0.91	0.767	14623	0.944
PGM5	-5.23	8	-1.33	0.0918	1177	0.939	0.908	16868	0.971	-2.44	8	-0.66	0.256	3937	0.91	0.744	14108	0.944
SEC11C	-5.23	8	-1.33	0.0918	1178	0.939	0.908	16867	0.971	-5.04	8	-1.48	0.0695	669	0.91	0.93	17376	0.966
PLEKHO1	-5.23	8	-1.33	0.092	1179	0.939	0.908	16866	0.971	-1.99	8	-0.51	0.304	5000	0.91	0.696	13045	0.944
CSRNP2	-5.22	8	-1.33	0.0922	1180	0.939	0.908	16865	0.971	-1.22	8	-0.27	0.394	7049	0.91	0.606	10996	0.944
KRTAP15-1	-5.22	8	-1.33	0.0923	1181	0.939	0.908	16864	0.971	0.32	8	0.22	0.587	11558	0.91	0.413	6487	0.944
CCDC107	-5.22	8	-1.33	0.0924	1182	0.939	0.908	16863	0.971	0.5	8	0.28	0.609	12050	0.91	0.391	5995	0.944
FAM43A	-5.22	8	-1.33	0.0924	1183	0.939	0.908	16862	0.971	-2.35	8	-0.63	0.266	4134	0.91	0.734	13911	0.944
TOGARAM1	-5.22	8	-1.33	0.0924	1184	0.939	0.908	16861	0.971	-4.34	8	-1.26	0.104	1130	0.91	0.896	16915	0.956
AP3B2	-5.22	8	-1.33	0.0924	1185	0.939	0.908	16860	0.971	-1.17	8	-0.25	0.4	7229	0.91	0.6	10816	0.944
MRM3	-5.22	8	-1.33	0.0925	1186	0.939	0.907	16859	0.971	-6.58	8	-1.97	0.0244	202	0.91	0.976	17843	0.987
ZMYND10	-5.22	8	-1.32	0.0926	1187	0.939	0.907	16858	0.971	-2.24	8	-0.59	0.277	4414	0.91	0.723	13631	0.944
SCAMP5	-5.22	8	-1.32	0.0926	1188	0.939	0.907	16857	0.971	-2.26	8	-0.6	0.274	4332	0.91	0.726	13713	0.944
AJAP1	-5.21	8	-1.32	0.0927	1189	0.939	0.907	16856	0.971	-0.28	8	0.03	0.511	9806	0.91	0.489	8239	0.944
EGR1	-5.21	8	-1.32	0.0927	1190	0.939	0.907	16855	0.971	-2.82	8	-0.78	0.219	3151	0.91	0.781	14894	0.944
BAZ1A	-5.21	8	-1.32	0.0928	1191	0.939	0.907	16854	0.971	-2.12	8	-0.55	0.29	4701	0.91	0.71	13344	0.944
CPA4	-5.21	8	-1.32	0.093	1192	0.939	0.907	16853	0.971	-2.75	8	-0.75	0.226	3284	0.91	0.774	14761	0.944
RAB15	-5.2	8	-1.32	0.0931	1193	0.939	0.907	16852	0.971	-3.5	8	-0.99	0.161	2050	0.91	0.839	15995	0.947
HEMK1	-5.2	8	-1.32	0.0932	1194	0.939	0.907	16851	0.971	-1.82	8	-0.46	0.323	5424	0.91	0.677	12621	0.944
IFITM10	-5.2	8	-1.32	0.0932	1195	0.939	0.907	16850	0.971	0.99	8	0.43	0.667	13224	0.91	0.333	4821	0.944
ZNF311	-5.2	8	-1.32	0.0933	1196	0.939	0.907	16849	0.971	-2.3	8	-0.61	0.27	4227	0.91	0.73	13818	0.944
JCHAIN	-5.2	8	-1.32	0.0933	1197	0.939	0.907	16848	0.971	-3.53	8	-1	0.158	2018	0.91	0.842	16027	0.947
IRF7	-5.2	8	-1.32	0.0933	1198	0.939	0.907	16847	0.971	-0.16	8	0.07	0.527	10207	0.91	0.473	7838	0.944
PTN	-5.19	8	-1.32	0.0936	1199	0.939	0.906	16846	0.971	-0.64	8	-0.09	0.465	8764	0.91	0.535	9281	0.944
LYPD3	-5.19	8	-1.32	0.0936	1200	0.939	0.906	16845	0.971	-5.01	8	-1.47	0.0707	680	0.91	0.929	17365	0.966
CDKN1C	-5.19	8	-1.32	0.0938	1201	0.939	0.906	16844	0.971	0.65	8	0.32	0.626	12414	0.91	0.374	5631	0.944
ATG14	-5.19	8	-1.32	0.0939	1202	0.939	0.906	16843	0.971	3.44	8	1.21	0.886	16686	0.958	0.114	1359	0.944
PGAM5	-5.19	8	-1.32	0.094	1203	0.939	0.906	16842	0.971	-0.18	8	0.06	0.524	10127	0.91	0.476	7918	0.944
PPP2R1A	-4.85	7	-1.32	0.094	1204	0.939	0.906	16841	0.971	0.02	8	0.12	0.55	10738	0.91	0.45	7307	0.944
ABRAXAS1	-5.18	8	-1.32	0.094	1205	0.939	0.906	16840	0.971	0.63	8	0.32	0.624	12364	0.91	0.376	5681	0.944
DIP2A	-5.18	8	-1.31	0.0943	1206	0.939	0.906	16839	0.971	-3.25	8	-0.91	0.18	2391	0.91	0.82	15654	0.945
EMC8	-5.18	8	-1.31	0.0943	1207	0.939	0.906	16838	0.971	-4.35	8	-1.26	0.103	1119	0.91	0.897	16926	0.956
C12orf50	-5.18	8	-1.31	0.0943	1208	0.939	0.906	16837	0.971	3.85	8	1.34	0.91	16953	0.968	0.0905	1092	0.944
CENPF	-5.18	8	-1.31	0.0944	1209	0.939	0.906	16836	0.971	-6.84	8	-2.05	0.0201	163	0.91	0.98	17882	0.989
CSF1R	-5.17	8	-1.31	0.0945	1210	0.939	0.906	16835	0.971	-2.96	8	-0.82	0.206	2896	0.91	0.794	15149	0.944
GDI1	-5.17	8	-1.31	0.0945	1211	0.939	0.905	16834	0.971	-5.44	8	-1.61	0.0541	501	0.91	0.946	17544	0.973
TAFA2	-5.17	8	-1.31	0.0945	1212	0.939	0.905	16833	0.971	-3.16	8	-0.89	0.188	2537	0.91	0.812	15508	0.944
EDC4	-5.17	8	-1.31	0.0946	1213	0.939	0.905	16832	0.971	0.29	8	0.21	0.583	11464	0.91	0.417	6581	0.944
CNOT2	-5.17	8	-1.31	0.0947	1214	0.939	0.905	16831	0.971	-2.22	8	-0.59	0.279	4472	0.91	0.721	13573	0.944
NPPC	-5.17	8	-1.31	0.0948	1215	0.939	0.905	16830	0.971	1.26	8	0.52	0.698	13794	0.913	0.302	4251	0.944
TNFRSF13B	-5.17	8	-1.31	0.0949	1216	0.939	0.905	16829	0.97	-0.91	8	-0.17	0.433	7963	0.91	0.567	10082	0.944
ZFAND6	-5.16	8	-1.31	0.0949	1217	0.939	0.905	16828	0.97	-1.82	8	-0.46	0.323	5431	0.91	0.677	12614	0.944
RHEX	-5.16	8	-1.31	0.095	1218	0.939	0.905	16827	0.97	-1.54	8	-0.37	0.356	6168	0.91	0.644	11877	0.944
PRKAG2	-5.16	8	-1.31	0.0951	1219	0.939	0.905	16826	0.97	-1.76	8	-0.44	0.33	5580	0.91	0.67	12465	0.944
WIPI2	-5.16	8	-1.31	0.0952	1220	0.939	0.905	16825	0.97	-2.88	8	-0.79	0.213	3048	0.91	0.787	14997	0.944
SERTAD4	-5.16	8	-1.31	0.0953	1221	0.939	0.905	16824	0.97	1.49	8	0.59	0.722	14185	0.918	0.278	3860	0.944
C2CD2L	-5.15	8	-1.31	0.0954	1222	0.939	0.905	16823	0.97	-2.54	8	-0.69	0.246	3711	0.91	0.754	14334	0.944
ISYNA1	-5.15	8	-1.31	0.0955	1223	0.939	0.905	16822	0.97	-4.53	8	-1.32	0.0934	987	0.91	0.907	17058	0.959
BOK	-5.15	8	-1.31	0.0955	1224	0.939	0.905	16821	0.97	-2.19	8	-0.58	0.282	4539	0.91	0.718	13506	0.944
SIRT3	-5.15	8	-1.31	0.0956	1225	0.939	0.904	16820	0.97	-3.2	8	-0.9	0.185	2483	0.91	0.815	15562	0.945
UAP1L1	-5.15	8	-1.31	0.0957	1226	0.939	0.904	16819	0.97	-2.93	8	-0.81	0.209	2960	0.91	0.791	15085	0.944
HOXB3	-5.15	8	-1.31	0.0957	1227	0.939	0.904	16818	0.97	-3.48	8	-0.99	0.162	2069	0.91	0.838	15976	0.947
EHMT1	-5.15	8	-1.31	0.0957	1228	0.939	0.904	16817	0.97	-5.3	8	-1.56	0.0591	555	0.91	0.941	17490	0.971
BARHL2	-5.14	8	-1.31	0.0958	1229	0.939	0.904	16816	0.97	-0.9	8	-0.17	0.434	7990	0.91	0.566	10055	0.944
CHAF1A	-5.14	8	-1.31	0.0959	1230	0.939	0.904	16815	0.97	3.25	8	1.15	0.875	16548	0.953	0.125	1497	0.944
MUC4	-5.14	8	-1.31	0.0959	1231	0.939	0.904	16814	0.97	-1.58	8	-0.38	0.351	6064	0.91	0.649	11981	0.944
EDA2R	-5.14	8	-1.3	0.0961	1232	0.939	0.904	16813	0.97	0.05	8	0.13	0.553	10805	0.91	0.447	7240	0.944
DNAH14	-5.14	8	-1.3	0.0962	1233	0.939	0.904	16812	0.97	0.99	8	0.43	0.667	13208	0.91	0.333	4837	0.944
TOMM7	-5.14	8	-1.3	0.0962	1234	0.939	0.904	16811	0.97	-5.81	8	-1.72	0.0424	371	0.91	0.958	17674	0.978
HOXC10	-5.13	8	-1.3	0.0963	1235	0.939	0.904	16810	0.97	-0.7	8	-0.1	0.458	8594	0.91	0.542	9451	0.944
GCK	-5.13	8	-1.3	0.0964	1236	0.939	0.904	16809	0.97	-3.2	8	-0.9	0.185	2479	0.91	0.815	15566	0.945
AP5S1	-5.13	8	-1.3	0.0964	1237	0.939	0.904	16808	0.97	0.42	8	0.25	0.598	11817	0.91	0.402	6228	0.944
WNT3A	-5.13	8	-1.3	0.0966	1238	0.939	0.903	16807	0.97	-0.93	8	-0.18	0.429	7888	0.91	0.571	10157	0.944
CAPN11	-5.13	8	-1.3	0.0967	1239	0.939	0.903	16806	0.97	0.44	8	0.26	0.602	11890	0.91	0.398	6155	0.944
ZNF672	-5.12	8	-1.3	0.0968	1240	0.939	0.903	16805	0.97	-5.5	8	-1.63	0.052	477	0.91	0.948	17568	0.974
ZNF324B	-5.12	8	-1.3	0.0968	1241	0.939	0.903	16804	0.97	-0.93	8	-0.18	0.43	7909	0.91	0.57	10136	0.944
C5orf38	-5.12	8	-1.3	0.097	1242	0.939	0.903	16803	0.97	-5.36	8	-1.58	0.0569	534	0.91	0.943	17511	0.972
OR2F2	-5.12	8	-1.3	0.0971	1243	0.939	0.903	16802	0.97	-6.99	8	-2.1	0.0179	138	0.91	0.982	17907	0.99
GRIP1	-5.11	8	-1.3	0.0973	1244	0.939	0.903	16801	0.97	-3.08	8	-0.86	0.195	2689	0.91	0.805	15356	0.944
AHNAK2	-5.11	8	-1.3	0.0974	1245	0.939	0.903	16800	0.969	-5.47	8	-1.62	0.0529	492	0.91	0.947	17553	0.974
SELPLG	-5.11	8	-1.3	0.0974	1246	0.939	0.903	16799	0.969	-2.01	8	-0.52	0.302	4972	0.91	0.698	13073	0.944
RBP2	-5.11	8	-1.3	0.0975	1247	0.939	0.902	16798	0.969	-2.38	8	-0.64	0.262	4067	0.91	0.738	13978	0.944
BEAN1	-5.11	8	-1.3	0.0975	1248	0.939	0.902	16797	0.969	-2.93	8	-0.81	0.209	2955	0.91	0.791	15090	0.944
LRRC26	-5.1	8	-1.29	0.0977	1249	0.939	0.902	16796	0.969	-2.17	8	-0.57	0.284	4580	0.91	0.716	13465	0.944
SEZ6L2	-5.1	8	-1.29	0.0977	1250	0.939	0.902	16795	0.969	-1.59	8	-0.39	0.349	6028	0.91	0.651	12017	0.944
AGPAT5	-5.1	8	-1.29	0.0977	1251	0.939	0.902	16794	0.969	-1.85	8	-0.47	0.319	5345	0.91	0.681	12700	0.944
GATA4	-5.1	8	-1.29	0.0979	1252	0.939	0.902	16793	0.969	-5.1	8	-1.5	0.0667	633	0.91	0.933	17412	0.967
ECE2	-5.1	8	-1.29	0.0979	1253	0.939	0.902	16792	0.969	-0.84	8	-0.15	0.441	8165	0.91	0.559	9880	0.944
DDIT4L	-5.09	8	-1.29	0.0981	1254	0.939	0.902	16791	0.969	-0.52	8	-0.05	0.482	9151	0.91	0.518	8894	0.944
MRPL10	-5.09	8	-1.29	0.0981	1255	0.939	0.902	16790	0.969	-2.62	8	-0.71	0.237	3516	0.91	0.763	14529	0.944
NOTCH1	-5.09	8	-1.29	0.0983	1256	0.939	0.902	16789	0.969	-4.41	8	-1.28	0.1	1081	0.91	0.9	16964	0.957
PINK1	-5.09	8	-1.29	0.0983	1257	0.939	0.902	16788	0.969	-2.32	8	-0.62	0.268	4189	0.91	0.732	13856	0.944
SKOR1	-5.09	8	-1.29	0.0984	1258	0.939	0.902	16787	0.969	-3.59	8	-1.02	0.154	1952	0.91	0.846	16093	0.949
TNFRSF11A	-5.08	8	-1.29	0.0986	1259	0.939	0.901	16786	0.969	-3.48	8	-0.99	0.162	2076	0.91	0.838	15969	0.947
ADAM11	-5.08	8	-1.29	0.0986	1260	0.939	0.901	16785	0.969	-6.08	8	-1.81	0.0352	301	0.91	0.965	17744	0.981
H4C9	-4.4	6	-1.29	0.0987	1261	0.939	0.901	16784	0.969	-5	6	-1.71	0.0434	377	0.91	0.957	17668	0.977
RORA	-5.08	8	-1.29	0.0988	1262	0.939	0.901	16783	0.969	-2.77	8	-0.76	0.224	3242	0.91	0.776	14803	0.944
NAA80	-5.08	8	-1.29	0.0988	1263	0.939	0.901	16782	0.969	-5.54	8	-1.64	0.0505	458	0.91	0.949	17587	0.974
FIP1L1	-5.08	8	-1.29	0.0988	1264	0.939	0.901	16781	0.969	-0.64	8	-0.08	0.466	8787	0.91	0.534	9258	0.944
PCSK9	-5.08	8	-1.29	0.0988	1265	0.939	0.901	16780	0.969	-5.16	8	-1.52	0.0643	606	0.91	0.936	17439	0.968
STPG4	-5.07	8	-1.29	0.099	1266	0.939	0.901	16779	0.969	-2.97	8	-0.82	0.205	2882	0.91	0.795	15163	0.944
CAPG	-5.07	8	-1.29	0.099	1267	0.939	0.901	16778	0.969	-6.49	8	-1.94	0.0261	225	0.91	0.974	17820	0.986
NUCB1	-5.07	8	-1.29	0.0992	1268	0.939	0.901	16777	0.969	-3.31	8	-0.93	0.176	2310	0.91	0.824	15735	0.945
PCYT2	-5.07	8	-1.28	0.0994	1269	0.939	0.901	16776	0.969	-3.43	8	-0.97	0.166	2140	0.91	0.834	15905	0.946
TSPAN15	-5.07	8	-1.28	0.0994	1270	0.939	0.901	16775	0.969	-0.14	8	0.07	0.529	10264	0.91	0.471	7781	0.944
DVL1	-5.06	8	-1.28	0.0996	1271	0.939	0.9	16774	0.969	-2.9	8	-0.8	0.211	2999	0.91	0.789	15046	0.944
TPX2	-5.06	8	-1.28	0.0996	1272	0.939	0.9	16773	0.969	0.08	8	0.14	0.557	10887	0.91	0.443	7158	0.944
C14orf180	-5.06	8	-1.28	0.0996	1273	0.939	0.9	16772	0.969	-1.29	8	-0.29	0.385	6849	0.91	0.615	11196	0.944
PRELID1	-5.06	8	-1.28	0.0997	1274	0.939	0.9	16771	0.969	-7.76	8	-2.34	0.0096	82	0.91	0.99	17963	0.995
ASTN1	-5.05	8	-1.28	0.1	1275	0.939	0.9	16770	0.968	-3.56	8	-1.01	0.156	1985	0.91	0.844	16060	0.948
CAV2	-5.05	8	-1.28	0.1	1276	0.939	0.9	16769	0.968	-4.16	8	-1.2	0.115	1282	0.91	0.885	16763	0.953
KCNV2	-5.05	8	-1.28	0.1	1277	0.939	0.9	16768	0.968	-0.41	8	-0.01	0.494	9429	0.91	0.506	8616	0.944
SAPCD2	-5.05	8	-1.28	0.1	1278	0.939	0.9	16767	0.968	-3.47	8	-0.98	0.163	2087	0.91	0.837	15958	0.947
RFLNA	-5.05	8	-1.28	0.1	1279	0.939	0.9	16766	0.968	-3.07	8	-0.85	0.196	2711	0.91	0.804	15334	0.944
KRT80	-5.05	8	-1.28	0.1	1280	0.939	0.9	16765	0.968	-1.58	8	-0.38	0.351	6070	0.91	0.649	11975	0.944
SMOX	-5.05	8	-1.28	0.1	1281	0.939	0.9	16764	0.968	-0.66	8	-0.09	0.464	8730	0.91	0.536	9315	0.944
LCE5A	-5.05	8	-1.28	0.1	1282	0.939	0.9	16763	0.968	-2.49	8	-0.67	0.25	3809	0.91	0.75	14236	0.944
ABCB8	-5.05	8	-1.28	0.1	1283	0.939	0.9	16762	0.968	-3.1	8	-0.86	0.194	2652	0.91	0.806	15393	0.944
GPRC5A	-5.04	8	-1.28	0.101	1284	0.939	0.899	16761	0.968	-3.63	8	-1.03	0.151	1894	0.91	0.849	16151	0.949
CNTNAP2	-5.04	8	-1.28	0.101	1285	0.939	0.899	16760	0.968	-4.1	8	-1.18	0.119	1351	0.91	0.881	16694	0.952
SNTA1	-5.03	8	-1.28	0.101	1286	0.939	0.899	16759	0.968	-0.99	8	-0.2	0.422	7701	0.91	0.578	10344	0.944
RPTN	-5.03	8	-1.28	0.101	1287	0.939	0.899	16758	0.968	-2.13	8	-0.56	0.289	4678	0.91	0.711	13367	0.944
AGRP	-5.03	8	-1.28	0.101	1288	0.939	0.899	16757	0.968	-1.78	8	-0.45	0.327	5523	0.91	0.673	12522	0.944
QKI	-5.03	8	-1.27	0.101	1289	0.939	0.899	16756	0.968	-5.88	8	-1.75	0.0404	353	0.91	0.96	17692	0.979
PRSS33	-5.03	8	-1.27	0.101	1290	0.939	0.899	16755	0.968	-3.16	8	-0.88	0.188	2546	0.91	0.812	15499	0.944
USP42	-5.03	8	-1.27	0.101	1291	0.939	0.899	16754	0.968	-5.15	8	-1.52	0.0648	613	0.91	0.935	17432	0.968
RNF25	-5.03	8	-1.27	0.101	1292	0.939	0.899	16753	0.968	0.28	8	0.21	0.582	11446	0.91	0.418	6599	0.944
SOGA3	-5.02	8	-1.27	0.101	1293	0.939	0.899	16752	0.968	0.14	8	0.16	0.564	11056	0.91	0.436	6989	0.944
TRIO	-5.02	8	-1.27	0.102	1294	0.939	0.898	16751	0.968	-5.26	8	-1.55	0.0605	569	0.91	0.939	17476	0.97
NEK10	-5.02	8	-1.27	0.102	1295	0.939	0.898	16750	0.968	-2.58	8	-0.7	0.241	3597	0.91	0.759	14448	0.944
ARFGAP1	-5.02	8	-1.27	0.102	1296	0.939	0.898	16749	0.968	-4.52	8	-1.32	0.0942	993	0.91	0.906	17052	0.958
TCP11L1	-5.02	8	-1.27	0.102	1297	0.939	0.898	16748	0.968	-2.13	8	-0.56	0.289	4674	0.91	0.711	13371	0.944
SUCLG1	-5.01	8	-1.27	0.102	1298	0.939	0.898	16747	0.968	1.72	8	0.66	0.746	14619	0.921	0.254	3426	0.944
ZFHX4	-5.01	8	-1.27	0.102	1299	0.939	0.898	16746	0.968	-4.26	8	-1.23	0.109	1198	0.91	0.891	16847	0.955
SHARPIN	-5.01	8	-1.27	0.102	1300	0.939	0.898	16745	0.968	-2.87	8	-0.79	0.214	3060	0.91	0.786	14985	0.944
ITLN1	-5.01	8	-1.27	0.102	1301	0.939	0.898	16744	0.968	-6.31	8	-1.88	0.0298	264	0.91	0.97	17781	0.984
CFB	-5.01	8	-1.27	0.102	1302	0.939	0.898	16743	0.968	2.02	8	0.76	0.776	15135	0.925	0.224	2910	0.944
RGS3	-5.01	8	-1.27	0.102	1303	0.939	0.898	16742	0.968	-6.1	8	-1.82	0.0345	296	0.91	0.965	17749	0.981
MAP7D1	-5.01	8	-1.27	0.102	1304	0.939	0.898	16741	0.968	-3.7	8	-1.05	0.146	1813	0.91	0.854	16232	0.949
PACSIN1	-5.01	8	-1.27	0.102	1305	0.939	0.898	16740	0.968	-0.72	8	-0.11	0.456	8546	0.91	0.544	9499	0.944
TWF2	-5.01	8	-1.27	0.102	1306	0.939	0.898	16739	0.968	-0.32	8	0.02	0.506	9698	0.91	0.494	8347	0.944
MRPL32	-5.01	8	-1.27	0.102	1307	0.939	0.898	16738	0.968	-3.21	8	-0.9	0.184	2470	0.91	0.816	15575	0.945
FAM47E-STBD1	-5	8	-1.27	0.102	1308	0.939	0.898	16737	0.968	-2.03	8	-0.53	0.299	4918	0.91	0.701	13127	0.944
MUC20	-5	8	-1.27	0.102	1309	0.939	0.898	16736	0.968	-5.66	8	-1.68	0.0467	418	0.91	0.953	17627	0.976
AGPS	-5	8	-1.27	0.103	1310	0.939	0.897	16735	0.968	-4.98	8	-1.46	0.0721	693	0.91	0.928	17352	0.965
TYMP	-5	8	-1.27	0.103	1311	0.939	0.897	16734	0.968	-1.63	8	-0.4	0.344	5919	0.91	0.656	12126	0.944
OSGIN1	-5	8	-1.27	0.103	1312	0.939	0.897	16733	0.968	-1.6	8	-0.39	0.348	5999	0.91	0.652	12046	0.944
UBR2	-5	8	-1.27	0.103	1313	0.939	0.897	16732	0.968	-3.34	8	-0.94	0.173	2262	0.91	0.827	15783	0.945
SSNA1	-5	8	-1.27	0.103	1314	0.939	0.897	16731	0.968	-3.31	8	-0.93	0.176	2307	0.91	0.824	15738	0.945
FBF1	-4.99	8	-1.27	0.103	1315	0.939	0.897	16730	0.968	0.5	8	0.28	0.609	12035	0.91	0.391	6010	0.944
PLA2G1B	-4.99	8	-1.27	0.103	1316	0.939	0.897	16729	0.968	-1.12	8	-0.24	0.406	7352	0.91	0.594	10693	0.944
UIMC1	-4.99	8	-1.27	0.103	1317	0.939	0.897	16728	0.968	-1.35	8	-0.31	0.378	6690	0.91	0.622	11355	0.944
ICMT	-4.99	8	-1.27	0.103	1318	0.939	0.897	16727	0.968	-3.34	8	-0.94	0.173	2264	0.91	0.827	15781	0.945
CUX2	-4.99	8	-1.26	0.103	1319	0.939	0.897	16726	0.968	-0.88	8	-0.16	0.436	8045	0.91	0.564	10000	0.944
SLC25A53	-4.99	8	-1.26	0.103	1320	0.939	0.897	16725	0.968	-4.17	8	-1.21	0.114	1266	0.91	0.886	16779	0.953
ANXA1	-4.99	8	-1.26	0.103	1321	0.939	0.897	16724	0.968	-3.84	8	-1.1	0.135	1627	0.91	0.865	16418	0.95
VGLL1	-4.98	8	-1.26	0.103	1322	0.939	0.897	16723	0.968	-2.48	8	-0.67	0.252	3833	0.91	0.748	14212	0.944
TMEM263	-4.98	8	-1.26	0.103	1323	0.939	0.897	16722	0.968	-1.23	8	-0.27	0.392	7022	0.91	0.608	11023	0.944
NSUN2	-4.98	8	-1.26	0.103	1324	0.939	0.897	16721	0.968	1.98	8	0.75	0.772	15060	0.925	0.228	2985	0.944
DENND3	-4.98	8	-1.26	0.103	1325	0.939	0.897	16720	0.968	-1.66	8	-0.41	0.341	5851	0.91	0.659	12194	0.944
COX8A	-4.98	8	-1.26	0.103	1326	0.939	0.897	16719	0.968	-2.37	8	-0.63	0.263	4090	0.91	0.737	13955	0.944
POU3F1	-4.98	8	-1.26	0.104	1327	0.939	0.896	16718	0.968	-0.56	8	-0.06	0.476	9024	0.91	0.524	9021	0.944
CT83	-4.98	8	-1.26	0.104	1328	0.939	0.896	16717	0.968	-2.49	8	-0.67	0.251	3829	0.91	0.749	14216	0.944
OR1S2	-4.31	6	-1.26	0.104	1329	0.939	0.896	16716	0.967	-2.01	6	-0.62	0.268	4180	0.91	0.732	13865	0.944
CHD3	-4.98	8	-1.26	0.104	1330	0.939	0.896	16715	0.967	-5.51	8	-1.63	0.0515	473	0.91	0.948	17572	0.974
SLC25A45	-4.97	8	-1.26	0.104	1331	0.939	0.896	16714	0.967	-2.6	8	-0.71	0.24	3566	0.91	0.76	14479	0.944
FOS	-4.97	8	-1.26	0.104	1332	0.939	0.896	16713	0.967	-1.9	8	-0.48	0.314	5210	0.91	0.686	12835	0.944
KLC4	-4.97	8	-1.26	0.104	1333	0.939	0.896	16712	0.967	-1.51	8	-0.36	0.359	6248	0.91	0.641	11797	0.944
RPS6KA4	-4.97	8	-1.26	0.104	1334	0.939	0.896	16711	0.967	0.54	8	0.29	0.614	12171	0.91	0.386	5874	0.944
SACS	-4.97	8	-1.26	0.104	1335	0.939	0.896	16710	0.967	-4.01	8	-1.16	0.124	1427	0.91	0.876	16618	0.951
SMYD2	-4.97	8	-1.26	0.104	1336	0.939	0.896	16709	0.967	-2.57	8	-0.7	0.243	3634	0.91	0.757	14411	0.944
LCN10	-4.97	8	-1.26	0.104	1337	0.939	0.896	16708	0.967	0.37	8	0.23	0.593	11680	0.91	0.407	6365	0.944
ELMO3	-4.96	8	-1.26	0.104	1338	0.939	0.896	16707	0.967	-0.16	8	0.07	0.526	10185	0.91	0.474	7860	0.944
FBXO40	-4.96	8	-1.26	0.104	1339	0.939	0.896	16706	0.967	-1.36	8	-0.31	0.377	6657	0.91	0.623	11388	0.944
STK11IP	-4.96	8	-1.26	0.105	1340	0.939	0.895	16705	0.967	-0.35	8	0.01	0.502	9589	0.91	0.498	8456	0.944
SLIT2	-4.96	8	-1.26	0.105	1341	0.939	0.895	16704	0.967	-0.25	8	0.04	0.515	9915	0.91	0.485	8130	0.944
CRYAA	-4.96	8	-1.26	0.105	1342	0.939	0.895	16703	0.967	-4.3	8	-1.25	0.107	1163	0.91	0.893	16882	0.955
ZCCHC7	-4.96	8	-1.26	0.105	1343	0.939	0.895	16702	0.967	-4	8	-1.15	0.125	1442	0.91	0.875	16603	0.951
CTPS1	-4.96	8	-1.26	0.105	1344	0.939	0.895	16701	0.967	-0.21	8	0.05	0.52	10038	0.91	0.48	8007	0.944
ADGRB3	-4.95	8	-1.25	0.105	1345	0.939	0.895	16700	0.967	-2.35	8	-0.63	0.266	4137	0.91	0.734	13908	0.944
MRPL38	-4.95	8	-1.25	0.105	1346	0.939	0.895	16699	0.967	0.13	8	0.16	0.563	11031	0.91	0.437	7014	0.944
ONECUT1	-4.95	8	-1.25	0.105	1347	0.939	0.895	16698	0.967	-2.87	8	-0.79	0.214	3062	0.91	0.786	14983	0.944
HOXD8	-4.95	8	-1.25	0.105	1348	0.939	0.895	16697	0.967	-1.01	8	-0.2	0.42	7651	0.91	0.58	10394	0.944
ACACB	-4.95	8	-1.25	0.105	1349	0.939	0.895	16696	0.967	0.01	8	0.12	0.548	10720	0.91	0.452	7325	0.944
DHX36	-4.95	8	-1.25	0.105	1350	0.939	0.895	16695	0.967	-2.51	8	-0.68	0.249	3780	0.91	0.751	14265	0.944
VWA5B2	-4.95	8	-1.25	0.105	1351	0.939	0.895	16694	0.967	-4.87	8	-1.43	0.0767	756	0.91	0.923	17289	0.963
TRIM67	-4.95	8	-1.25	0.105	1352	0.939	0.895	16693	0.967	-0.98	8	-0.19	0.423	7737	0.91	0.577	10308	0.944
CXXC1	-4.94	8	-1.25	0.105	1353	0.939	0.895	16692	0.967	0.03	8	0.13	0.55	10752	0.91	0.45	7293	0.944
CDH22	-4.94	8	-1.25	0.106	1354	0.939	0.894	16691	0.967	-4.52	8	-1.32	0.0939	991	0.91	0.906	17054	0.959
WNT4	-4.94	8	-1.25	0.106	1355	0.939	0.894	16690	0.967	-3.85	8	-1.1	0.135	1619	0.91	0.865	16426	0.95
ATP6V1E1	-4.93	8	-1.25	0.106	1356	0.939	0.894	16689	0.967	-0.26	8	0.04	0.515	9902	0.91	0.485	8143	0.944
USP6	-4.93	8	-1.25	0.106	1357	0.939	0.894	16688	0.967	-6.68	8	-2	0.0228	188	0.91	0.977	17857	0.987
TMEM209	-4.93	8	-1.25	0.106	1358	0.939	0.894	16687	0.967	-2.01	8	-0.52	0.302	4958	0.91	0.698	13087	0.944
ASF1B	-4.93	8	-1.25	0.106	1359	0.939	0.894	16686	0.967	-1.72	8	-0.43	0.335	5717	0.91	0.665	12328	0.944
TMEM260	-4.93	8	-1.25	0.106	1360	0.939	0.894	16685	0.967	-1.53	8	-0.37	0.357	6183	0.91	0.643	11862	0.944
PLEKHA8	-4.93	8	-1.25	0.106	1361	0.939	0.894	16684	0.967	-1.07	8	-0.22	0.412	7491	0.91	0.588	10554	0.944
SLC25A43	-4.93	8	-1.25	0.106	1362	0.939	0.894	16683	0.967	-4.2	8	-1.21	0.112	1240	0.91	0.888	16805	0.953
NEURL1B	-4.93	8	-1.25	0.106	1363	0.939	0.894	16682	0.967	-4.58	8	-1.33	0.0912	952	0.91	0.909	17093	0.959
OLIG2	-4.93	8	-1.25	0.106	1364	0.939	0.894	16681	0.967	-1.58	8	-0.38	0.351	6071	0.91	0.649	11974	0.944
DARS1	-4.27	6	-1.25	0.106	1365	0.939	0.894	16680	0.967	-0.89	6	-0.21	0.418	7624	0.91	0.582	10421	0.944
COQ10A	-4.93	8	-1.25	0.106	1366	0.939	0.894	16679	0.967	1.58	8	0.62	0.731	14355	0.919	0.269	3690	0.944
PCNT	-4.92	8	-1.25	0.106	1367	0.939	0.894	16678	0.967	-20.81	8	-6.48	4.6e-11	2	3.42e-07	1	18043	1
SMIM12	-4.92	8	-1.25	0.106	1368	0.939	0.894	16677	0.967	-1.39	8	-0.32	0.374	6576	0.91	0.626	11469	0.944
CD82	-4.92	8	-1.25	0.106	1369	0.939	0.894	16676	0.967	-4.71	8	-1.37	0.0846	860	0.91	0.915	17185	0.961
PIMREG	-4.92	8	-1.25	0.106	1370	0.939	0.894	16675	0.967	1.19	8	0.5	0.69	13654	0.912	0.31	4391	0.944
NKAIN1	-4.91	8	-1.24	0.107	1371	0.939	0.893	16674	0.967	-2.06	8	-0.54	0.296	4853	0.91	0.704	13192	0.944
RNF38	-4.91	8	-1.24	0.107	1372	0.939	0.893	16673	0.967	1.37	8	0.55	0.709	13985	0.915	0.291	4060	0.944
PHLDA3	-4.91	8	-1.24	0.107	1373	0.939	0.893	16672	0.967	-4.83	8	-1.41	0.0786	782	0.91	0.921	17263	0.963
SPHKAP	-4.91	8	-1.24	0.107	1374	0.939	0.893	16671	0.966	-1.57	8	-0.38	0.352	6090	0.91	0.648	11955	0.944
PKNOX2	-4.9	8	-1.24	0.107	1375	0.939	0.893	16670	0.966	-4.13	8	-1.19	0.116	1306	0.91	0.884	16739	0.952
ARMC10	-4.9	8	-1.24	0.107	1376	0.939	0.893	16669	0.966	-0.15	8	0.07	0.528	10244	0.91	0.472	7801	0.944
NPIPB5	-3.46	4	-1.24	0.107	1377	0.939	0.893	16668	0.966	-2.35	4	-0.93	0.175	2290	0.91	0.825	15755	0.945
CCR3	-4.9	8	-1.24	0.107	1378	0.939	0.893	16667	0.966	-1.09	8	-0.23	0.41	7445	0.91	0.59	10600	0.944
LLGL1	-4.9	8	-1.24	0.108	1379	0.939	0.892	16666	0.966	-3.06	8	-0.85	0.197	2721	0.91	0.803	15324	0.944
RMND1	-4.9	8	-1.24	0.108	1380	0.939	0.892	16665	0.966	-2.33	8	-0.62	0.267	4176	0.91	0.733	13869	0.944
PERM1	-4.89	8	-1.24	0.108	1381	0.939	0.892	16664	0.966	-3.44	8	-0.97	0.165	2131	0.91	0.835	15914	0.947
EIF5	-4.89	8	-1.24	0.108	1382	0.939	0.892	16663	0.966	3.92	8	1.36	0.913	16990	0.97	0.087	1055	0.944
ADAMTS18	-4.89	8	-1.24	0.108	1383	0.939	0.892	16662	0.966	-1.44	8	-0.34	0.368	6440	0.91	0.632	11605	0.944
MOB3C	-4.89	8	-1.24	0.108	1384	0.939	0.892	16661	0.966	-1.2	8	-0.26	0.397	7136	0.91	0.603	10909	0.944
MAP4K2	-4.89	8	-1.24	0.108	1385	0.939	0.892	16660	0.966	0.09	8	0.15	0.558	10913	0.91	0.442	7132	0.944
ANKRD9	-4.89	8	-1.24	0.108	1386	0.939	0.892	16659	0.966	-3.55	8	-1.01	0.157	1994	0.91	0.843	16051	0.948
MUS81	-4.88	8	-1.24	0.108	1387	0.939	0.892	16658	0.966	-0.83	8	-0.15	0.442	8194	0.91	0.558	9851	0.944
PRKAR1B	-4.88	8	-1.24	0.108	1388	0.939	0.892	16657	0.966	-2.75	8	-0.75	0.225	3275	0.91	0.775	14770	0.944
TGFBR3L	-4.88	8	-1.24	0.108	1389	0.939	0.892	16656	0.966	-2.76	8	-0.76	0.224	3255	0.91	0.776	14790	0.944
ZFYVE28	-4.88	8	-1.24	0.108	1390	0.939	0.892	16655	0.966	-0.68	8	-0.1	0.461	8670	0.91	0.539	9375	0.944
E2F4	-4.88	8	-1.24	0.108	1391	0.939	0.892	16654	0.966	-0.21	8	0.05	0.521	10047	0.91	0.479	7998	0.944
FDX1	-4.88	8	-1.23	0.109	1392	0.939	0.891	16653	0.966	-0.63	8	-0.08	0.468	8825	0.91	0.532	9220	0.944
SHB	-4.87	8	-1.23	0.109	1393	0.939	0.891	16652	0.966	-0.87	8	-0.16	0.438	8079	0.91	0.562	9966	0.944
B3GNT2	-4.87	8	-1.23	0.109	1394	0.939	0.891	16651	0.966	-0.84	8	-0.15	0.441	8172	0.91	0.559	9873	0.944
AGTRAP	-4.87	8	-1.23	0.109	1395	0.939	0.891	16650	0.966	-2.51	8	-0.68	0.249	3771	0.91	0.751	14274	0.944
GPRIN1	-4.87	8	-1.23	0.109	1396	0.939	0.891	16649	0.966	-0.62	8	-0.08	0.468	8830	0.91	0.532	9215	0.944
NEU3	-4.87	8	-1.23	0.109	1397	0.939	0.891	16648	0.966	-2.81	8	-0.77	0.219	3161	0.91	0.781	14884	0.944
PSD	-4.87	8	-1.23	0.109	1398	0.939	0.891	16647	0.966	-2.23	8	-0.59	0.278	4436	0.91	0.722	13609	0.944
C16orf89	-4.86	8	-1.23	0.109	1399	0.939	0.891	16646	0.966	-4.75	8	-1.39	0.0824	821	0.91	0.918	17224	0.961
AK9	-4.86	8	-1.23	0.109	1400	0.939	0.891	16645	0.966	0.39	8	0.24	0.595	11729	0.91	0.405	6316	0.944
BLOC1S5	-4.86	8	-1.23	0.109	1401	0.939	0.891	16644	0.966	-0.88	8	-0.16	0.436	8035	0.91	0.564	10010	0.944
SCAF8	-4.86	8	-1.23	0.109	1402	0.939	0.891	16643	0.966	-1.58	8	-0.38	0.351	6059	0.91	0.649	11986	0.944
RHOT2	-4.86	8	-1.23	0.109	1403	0.939	0.891	16642	0.966	-1.51	8	-0.36	0.359	6239	0.91	0.641	11806	0.944
CDC27	-4.21	6	-1.23	0.109	1404	0.939	0.891	16641	0.966	-2.11	6	-0.66	0.256	3933	0.91	0.744	14112	0.944
BOP1	-4.54	7	-1.23	0.11	1405	0.939	0.89	16640	0.965	-1.23	7	-0.3	0.382	6774	0.91	0.618	11271	0.944
COMT	-4.85	8	-1.23	0.11	1406	0.939	0.89	16639	0.965	-2.78	8	-0.76	0.223	3225	0.91	0.777	14820	0.944
PHF2	-4.85	8	-1.23	0.11	1407	0.939	0.89	16638	0.965	-2.94	8	-0.81	0.208	2950	0.91	0.792	15095	0.944
DRGX	-4.85	8	-1.23	0.11	1408	0.939	0.89	16637	0.965	-1.42	8	-0.33	0.369	6476	0.91	0.631	11569	0.944
FOXM1	-4.85	8	-1.23	0.11	1409	0.939	0.89	16636	0.965	2.23	8	0.82	0.795	15430	0.93	0.205	2615	0.944
TMEM105	-4.85	8	-1.23	0.11	1410	0.939	0.89	16635	0.965	-2.39	8	-0.64	0.261	4046	0.91	0.739	13999	0.944
ATP4A	-4.84	8	-1.23	0.11	1411	0.939	0.89	16634	0.965	-2	8	-0.52	0.303	4986	0.91	0.697	13059	0.944
IRGC	-4.84	8	-1.23	0.11	1412	0.939	0.89	16633	0.965	-6.81	8	-2.04	0.0206	166	0.91	0.979	17879	0.988
C9orf152	-4.84	8	-1.22	0.11	1413	0.939	0.89	16632	0.965	-0.04	8	0.11	0.542	10569	0.91	0.458	7476	0.944
GSTP1	-4.84	8	-1.22	0.11	1414	0.939	0.89	16631	0.965	-5.71	8	-1.69	0.0454	397	0.91	0.955	17648	0.976
NOP53	-4.84	8	-1.22	0.11	1415	0.939	0.89	16630	0.965	-1.62	8	-0.4	0.346	5956	0.91	0.654	12089	0.944
PTPN7	-4.84	8	-1.22	0.111	1416	0.939	0.889	16629	0.965	-4.4	8	-1.28	0.101	1085	0.91	0.899	16960	0.957
SNPH	-4.84	8	-1.22	0.111	1417	0.939	0.889	16628	0.965	-5.67	8	-1.68	0.0465	417	0.91	0.953	17628	0.976
SEPTIN6	-4.83	8	-1.22	0.111	1418	0.939	0.889	16627	0.965	-3.83	8	-1.1	0.136	1645	0.91	0.864	16400	0.95
COA7	-4.83	8	-1.22	0.111	1419	0.939	0.889	16626	0.965	-4.48	8	-1.3	0.0962	1017	0.91	0.904	17028	0.958
PLEKHG2	-4.83	8	-1.22	0.111	1420	0.939	0.889	16625	0.965	-1.44	8	-0.34	0.367	6430	0.91	0.633	11615	0.944
FXYD2	-4.83	8	-1.22	0.111	1421	0.939	0.889	16624	0.965	-2.06	8	-0.53	0.297	4868	0.91	0.703	13177	0.944
FAAH	-4.83	8	-1.22	0.111	1422	0.939	0.889	16623	0.965	-2.31	8	-0.61	0.269	4212	0.91	0.731	13833	0.944
SLC26A7	-4.83	8	-1.22	0.111	1423	0.939	0.889	16622	0.965	-5.23	8	-1.54	0.0619	581	0.91	0.938	17464	0.969
AP4B1	-4.82	8	-1.22	0.111	1424	0.939	0.889	16621	0.965	-5.44	8	-1.61	0.054	500	0.91	0.946	17545	0.973
SOX4	-4.82	8	-1.22	0.111	1425	0.939	0.889	16620	0.965	-0.99	8	-0.2	0.422	7712	0.91	0.578	10333	0.944
RNF220	-4.82	8	-1.22	0.111	1426	0.939	0.889	16619	0.965	-2.17	8	-0.57	0.284	4577	0.91	0.716	13468	0.944
PLIN5	-4.82	8	-1.22	0.112	1427	0.939	0.888	16618	0.965	-2.76	8	-0.76	0.224	3250	0.91	0.776	14795	0.944
COX6A1	-4.17	6	-1.22	0.112	1428	0.939	0.888	16617	0.965	-3.01	6	-0.98	0.162	2081	0.91	0.838	15964	0.947
COQ9	-4.81	8	-1.22	0.112	1429	0.939	0.888	16616	0.965	-0.16	8	0.07	0.527	10209	0.91	0.473	7836	0.944
GABRR2	-4.81	8	-1.22	0.112	1430	0.939	0.888	16615	0.965	-1.47	8	-0.35	0.363	6340	0.91	0.637	11705	0.944
TCF23	-4.81	8	-1.22	0.112	1431	0.939	0.888	16614	0.965	-1.89	8	-0.48	0.315	5245	0.91	0.685	12800	0.944
GRK6	-4.81	8	-1.22	0.112	1432	0.939	0.888	16613	0.965	-0.68	8	-0.1	0.461	8672	0.91	0.539	9373	0.944
CCNA1	-4.81	8	-1.22	0.112	1433	0.939	0.888	16612	0.965	-0.85	8	-0.15	0.439	8130	0.91	0.561	9915	0.944
TPBGL	-4.81	8	-1.22	0.112	1434	0.939	0.888	16611	0.965	-3.13	8	-0.87	0.191	2599	0.91	0.809	15446	0.944
SEZ6L	-4.81	8	-1.22	0.112	1435	0.939	0.888	16610	0.965	1.21	8	0.5	0.692	13698	0.912	0.308	4347	0.944
SLC20A1	-4.8	8	-1.21	0.112	1436	0.939	0.888	16609	0.965	1.55	8	0.61	0.729	14319	0.919	0.271	3726	0.944
NPM2	-4.8	8	-1.21	0.112	1437	0.939	0.888	16608	0.965	-4	8	-1.15	0.125	1450	0.91	0.875	16595	0.951
SLC2A2	-4.8	8	-1.21	0.112	1438	0.939	0.888	16607	0.965	0.96	8	0.42	0.663	13129	0.91	0.337	4916	0.944
ADD1	-4.8	8	-1.21	0.112	1439	0.939	0.888	16606	0.965	-1.68	8	-0.42	0.339	5799	0.91	0.661	12246	0.944
MDK	-4.8	8	-1.21	0.112	1440	0.939	0.888	16605	0.965	-1.82	8	-0.46	0.323	5441	0.91	0.677	12604	0.944
NOX4	-4.8	8	-1.21	0.112	1441	0.939	0.888	16604	0.965	-1.77	8	-0.44	0.329	5556	0.91	0.671	12489	0.944
DNAAF2	-4.8	8	-1.21	0.113	1442	0.939	0.887	16603	0.964	-3.93	8	-1.13	0.129	1530	0.91	0.871	16515	0.951
DIRC3	-4.8	8	-1.21	0.113	1443	0.939	0.887	16602	0.964	-0.23	8	0.05	0.518	9997	0.91	0.482	8048	0.944
CYP27B1	-4.8	8	-1.21	0.113	1444	0.939	0.887	16601	0.964	-1.65	8	-0.41	0.342	5871	0.91	0.658	12174	0.944
CDHR2	-4.79	8	-1.21	0.113	1445	0.939	0.887	16600	0.964	-3.46	8	-0.98	0.163	2100	0.91	0.837	15945	0.947
GXYLT1	-4.79	8	-1.21	0.113	1446	0.939	0.887	16599	0.964	0.78	8	0.36	0.642	12726	0.91	0.358	5319	0.944
NDUFB10	-4.79	8	-1.21	0.113	1447	0.939	0.887	16598	0.964	-1.03	8	-0.21	0.417	7594	0.91	0.583	10451	0.944
ACD	-4.79	8	-1.21	0.113	1448	0.939	0.887	16597	0.964	-2.44	8	-0.65	0.256	3940	0.91	0.744	14105	0.944
TRAK1	-4.79	8	-1.21	0.113	1449	0.939	0.887	16596	0.964	-3.91	8	-1.12	0.131	1557	0.91	0.869	16488	0.951
MMP3	-4.79	8	-1.21	0.113	1450	0.939	0.887	16595	0.964	-4.93	8	-1.45	0.0739	719	0.91	0.926	17326	0.964
NDUFB6	-4.79	8	-1.21	0.113	1451	0.939	0.887	16594	0.964	-3.99	8	-1.15	0.126	1465	0.91	0.874	16580	0.951
OR10Q1	-4.79	8	-1.21	0.113	1452	0.939	0.887	16593	0.964	-6.16	8	-1.83	0.0333	285	0.91	0.967	17760	0.982
AKAP3	-4.79	8	-1.21	0.113	1453	0.939	0.887	16592	0.964	0.08	8	0.14	0.556	10874	0.91	0.444	7171	0.944
MGAT2	-4.79	8	-1.21	0.113	1454	0.939	0.887	16591	0.964	0.24	8	0.19	0.577	11339	0.91	0.423	6706	0.944
HSF4	-4.78	8	-1.21	0.113	1455	0.939	0.887	16590	0.964	-6.3	8	-1.88	0.03	266	0.91	0.97	17779	0.984
OSGEPL1	-4.78	8	-1.21	0.113	1456	0.939	0.887	16589	0.964	-6.7	8	-2.01	0.0224	184	0.91	0.978	17861	0.988
BECN1	-4.78	8	-1.21	0.113	1457	0.939	0.887	16588	0.964	3.25	8	1.15	0.875	16551	0.953	0.125	1494	0.944
SAMD5	-4.78	8	-1.21	0.114	1458	0.939	0.886	16587	0.964	-2.07	8	-0.54	0.295	4846	0.91	0.705	13199	0.944
OPCML	-4.78	8	-1.21	0.114	1459	0.939	0.886	16586	0.964	0.43	8	0.25	0.6	11847	0.91	0.4	6198	0.944
MYCBPAP	-4.78	8	-1.21	0.114	1460	0.939	0.886	16585	0.964	-4.47	8	-1.3	0.0969	1027	0.91	0.903	17018	0.958
FNDC10	-4.78	8	-1.21	0.114	1461	0.939	0.886	16584	0.964	-1.26	8	-0.28	0.389	6953	0.91	0.611	11092	0.944
RAD51B	-4.77	8	-1.21	0.114	1462	0.939	0.886	16583	0.964	2.73	8	0.98	0.837	16060	0.94	0.163	1985	0.944
PRNP	-4.77	8	-1.21	0.114	1463	0.939	0.886	16582	0.964	-0.68	8	-0.1	0.461	8657	0.91	0.539	9388	0.944
ASB12	-4.77	8	-1.2	0.114	1464	0.939	0.886	16581	0.964	-5.59	8	-1.65	0.049	444	0.91	0.951	17601	0.975
RXRG	-4.77	8	-1.2	0.114	1465	0.939	0.886	16580	0.964	1.56	8	0.61	0.73	14325	0.919	0.27	3720	0.944
C16orf92	-4.77	8	-1.2	0.114	1466	0.939	0.886	16579	0.964	-4.28	8	-1.24	0.108	1185	0.91	0.892	16860	0.955
TMEM231	-4.76	8	-1.2	0.114	1467	0.939	0.886	16578	0.964	-8.47	8	-2.57	0.00513	55	0.91	0.995	17990	0.998
SYNCRIP	-4.76	8	-1.2	0.114	1468	0.939	0.886	16577	0.964	1.63	8	0.64	0.738	14461	0.92	0.262	3584	0.944
SDHAF2	-4.76	8	-1.2	0.114	1469	0.939	0.886	16576	0.964	-2.26	8	-0.6	0.275	4343	0.91	0.725	13702	0.944
LRRC55	-4.76	8	-1.2	0.115	1470	0.939	0.885	16575	0.964	-3.65	8	-1.04	0.15	1870	0.91	0.85	16175	0.949
AMMECR1	-4.76	8	-1.2	0.115	1471	0.939	0.885	16574	0.964	0.46	8	0.26	0.604	11934	0.91	0.396	6111	0.944
GRIK4	-4.76	8	-1.2	0.115	1472	0.939	0.885	16573	0.964	0.73	8	0.35	0.637	12610	0.91	0.363	5435	0.944
MTMR12	-4.76	8	-1.2	0.115	1473	0.939	0.885	16572	0.964	-0.58	8	-0.07	0.473	8939	0.91	0.527	9106	0.944
SPATA46	-4.76	8	-1.2	0.115	1474	0.939	0.885	16571	0.964	2.04	8	0.76	0.777	15159	0.925	0.223	2886	0.944
IQCB1	-4.75	8	-1.2	0.115	1475	0.939	0.885	16570	0.964	-5.58	8	-1.65	0.0493	451	0.91	0.951	17594	0.975
RARRES1	-4.75	8	-1.2	0.115	1476	0.939	0.885	16569	0.964	-5.69	8	-1.69	0.0459	403	0.91	0.954	17642	0.976
PHOX2A	-4.75	8	-1.2	0.115	1477	0.939	0.885	16568	0.964	-3.85	8	-1.1	0.135	1616	0.91	0.865	16429	0.95
TUBGCP5	-4.75	8	-1.2	0.115	1478	0.939	0.885	16567	0.964	-4.83	8	-1.41	0.0786	779	0.91	0.921	17266	0.963
CTSA	-4.75	8	-1.2	0.115	1479	0.939	0.885	16566	0.964	-3.65	8	-1.04	0.149	1861	0.91	0.851	16184	0.949
FAHD1	-4.75	8	-1.2	0.115	1480	0.939	0.885	16565	0.964	-3.55	8	-1.01	0.157	1991	0.91	0.843	16054	0.948
ALDH4A1	-4.74	8	-1.2	0.115	1481	0.939	0.885	16564	0.964	-1.33	8	-0.3	0.381	6749	0.91	0.619	11296	0.944
RBMS1	-4.74	8	-1.2	0.115	1482	0.939	0.885	16563	0.964	-8.39	8	-2.54	0.00551	59	0.91	0.994	17986	0.998
UBAC1	-4.74	8	-1.2	0.115	1483	0.939	0.885	16562	0.964	-0.96	8	-0.19	0.426	7786	0.91	0.574	10259	0.944
MYO3B	-4.74	8	-1.2	0.116	1484	0.939	0.884	16561	0.964	-2.39	8	-0.64	0.261	4042	0.91	0.739	14003	0.944
GFOD1	-4.74	8	-1.2	0.116	1485	0.939	0.884	16560	0.964	-1.76	8	-0.44	0.329	5567	0.91	0.671	12478	0.944
AGAP3	-4.74	8	-1.2	0.116	1486	0.939	0.884	16559	0.964	-3.2	8	-0.9	0.185	2484	0.91	0.815	15561	0.945
EPHA8	-4.74	8	-1.2	0.116	1487	0.939	0.884	16558	0.964	-2.78	8	-0.76	0.223	3226	0.91	0.777	14819	0.944
SLC34A1	-4.73	8	-1.2	0.116	1488	0.939	0.884	16557	0.963	-3.61	8	-1.03	0.152	1923	0.91	0.848	16122	0.949
ZNF471	-4.73	8	-1.2	0.116	1489	0.939	0.884	16556	0.963	-3	8	-0.83	0.202	2811	0.91	0.798	15234	0.944
PDE3A	-4.73	8	-1.2	0.116	1490	0.939	0.884	16555	0.963	-2.62	8	-0.71	0.238	3536	0.91	0.762	14509	0.944
SHF	-4.73	8	-1.2	0.116	1491	0.939	0.884	16554	0.963	0	8	0.12	0.546	10659	0.91	0.454	7386	0.944
SRRM1	-4.73	8	-1.19	0.116	1492	0.939	0.884	16553	0.963	0.83	8	0.38	0.649	12841	0.91	0.351	5204	0.944
NF2	-4.73	8	-1.19	0.116	1493	0.939	0.884	16552	0.963	10.18	8	3.35	1	17906	1	0.00041	139	0.053
STRN4	-4.73	8	-1.19	0.116	1494	0.939	0.884	16551	0.963	-0.03	8	0.11	0.543	10597	0.91	0.457	7448	0.944
UPK1B	-4.73	8	-1.19	0.116	1495	0.939	0.884	16550	0.963	-0.47	8	-0.03	0.487	9264	0.91	0.513	8781	0.944
C17orf49	-2.36	2	-1.19	0.116	1496	0.939	0.884	16549	0.963	-0.65	2	-0.3	0.383	6802	0.91	0.617	11243	0.944
MRGPRE	-4.72	8	-1.19	0.116	1497	0.939	0.884	16548	0.963	-1.93	8	-0.5	0.31	5129	0.91	0.69	12916	0.944
PRND	-4.72	8	-1.19	0.116	1498	0.939	0.884	16547	0.963	-0.76	8	-0.12	0.451	8429	0.91	0.549	9616	0.944
FFAR1	-4.72	8	-1.19	0.116	1499	0.939	0.884	16546	0.963	-0.84	8	-0.15	0.44	8149	0.91	0.56	9896	0.944
MYO1A	-4.72	8	-1.19	0.116	1500	0.939	0.884	16545	0.963	-5.05	8	-1.48	0.0688	658	0.91	0.931	17387	0.966
RAC3	-4.71	8	-1.19	0.117	1501	0.939	0.883	16544	0.963	-2.36	8	-0.63	0.264	4093	0.91	0.736	13952	0.944
PIK3CD-AS1	-4.71	8	-1.19	0.117	1502	0.939	0.883	16543	0.963	-1.51	8	-0.36	0.359	6228	0.91	0.641	11817	0.944
FER1L6	-4.71	8	-1.19	0.117	1503	0.939	0.883	16542	0.963	2.19	8	0.81	0.792	15398	0.928	0.208	2647	0.944
C12orf71	-4.71	8	-1.19	0.117	1504	0.939	0.883	16541	0.963	-5.05	8	-1.48	0.0689	661	0.91	0.931	17384	0.966
CACNA1F	-4.71	8	-1.19	0.117	1505	0.939	0.883	16540	0.963	-0.73	8	-0.11	0.454	8501	0.91	0.546	9544	0.944
KBTBD13	-4.71	8	-1.19	0.117	1506	0.939	0.883	16539	0.963	-2.14	8	-0.56	0.288	4651	0.91	0.712	13394	0.944
TAF1C	-4.08	6	-1.19	0.117	1507	0.939	0.883	16538	0.963	-1.8	6	-0.54	0.294	4810	0.91	0.706	13235	0.944
FAAP20	-4.7	8	-1.19	0.117	1508	0.939	0.883	16537	0.963	-3.1	8	-0.87	0.193	2640	0.91	0.807	15405	0.944
UQCRC1	-4.7	8	-1.19	0.117	1509	0.939	0.883	16536	0.963	-5.48	8	-1.62	0.0527	490	0.91	0.947	17555	0.974
C1QTNF8	-4.7	8	-1.19	0.117	1510	0.939	0.883	16535	0.963	-3.92	8	-1.13	0.13	1546	0.91	0.87	16499	0.951
GPR25	-4.7	8	-1.19	0.118	1511	0.939	0.882	16534	0.963	0.27	8	0.2	0.58	11400	0.91	0.42	6645	0.944
SOX11	-4.7	8	-1.19	0.118	1512	0.939	0.882	16533	0.963	2.77	8	1	0.84	16108	0.941	0.16	1937	0.944
SERPINB10	-4.7	8	-1.19	0.118	1513	0.939	0.882	16532	0.963	2.03	8	0.76	0.777	15154	0.925	0.223	2891	0.944
FRY	-4.7	8	-1.19	0.118	1514	0.939	0.882	16531	0.963	-3.33	8	-0.94	0.174	2270	0.91	0.826	15775	0.945
MBOAT7	-4.69	8	-1.19	0.118	1515	0.939	0.882	16530	0.963	-6.72	8	-2.01	0.022	179	0.91	0.978	17866	0.988
ABHD14B	-4.69	8	-1.19	0.118	1516	0.939	0.882	16529	0.963	-0.83	8	-0.15	0.442	8197	0.91	0.558	9848	0.944
SCARB2	-4.69	8	-1.18	0.118	1517	0.939	0.882	16528	0.963	-1.07	8	-0.22	0.412	7483	0.91	0.588	10562	0.944
NGFR	-4.69	8	-1.18	0.118	1518	0.939	0.882	16527	0.963	-3.24	8	-0.91	0.181	2417	0.91	0.819	15628	0.945
NACAD	-4.69	8	-1.18	0.118	1519	0.939	0.882	16526	0.963	-2.16	8	-0.57	0.286	4616	0.91	0.714	13429	0.944
PSD4	-4.69	8	-1.18	0.118	1520	0.939	0.882	16525	0.963	-4.25	8	-1.23	0.109	1206	0.91	0.891	16839	0.955
OR5AU1	-4.69	8	-1.18	0.118	1521	0.939	0.882	16524	0.963	0.81	8	0.38	0.646	12801	0.91	0.354	5244	0.944
CEMP1	-4.69	8	-1.18	0.118	1522	0.939	0.882	16523	0.963	1.43	8	0.57	0.716	14081	0.917	0.284	3964	0.944
CRYZ	-4.69	8	-1.18	0.118	1523	0.939	0.882	16522	0.963	-2.35	8	-0.63	0.266	4138	0.91	0.734	13907	0.944
FKBP5	-4.68	8	-1.18	0.118	1524	0.939	0.882	16521	0.963	-0.45	8	-0.03	0.49	9344	0.91	0.51	8701	0.944
CRISPLD1	-4.68	8	-1.18	0.118	1525	0.939	0.882	16520	0.963	-1.29	8	-0.29	0.385	6865	0.91	0.615	11180	0.944
ANKRD44	-4.68	8	-1.18	0.118	1526	0.939	0.882	16519	0.963	-1.58	8	-0.38	0.351	6072	0.91	0.649	11973	0.944
PML	-4.68	8	-1.18	0.118	1527	0.939	0.882	16518	0.963	-1.67	8	-0.41	0.341	5844	0.91	0.659	12201	0.944
SUGP1	-4.68	8	-1.18	0.119	1528	0.939	0.881	16517	0.963	-5.6	8	-1.66	0.0487	441	0.91	0.951	17604	0.975
CYP7B1	-4.68	8	-1.18	0.119	1529	0.939	0.881	16516	0.963	-3.29	8	-0.92	0.178	2346	0.91	0.822	15699	0.945
RRP12	-4.68	8	-1.18	0.119	1530	0.939	0.881	16515	0.963	-6.08	8	-1.81	0.0351	299	0.91	0.965	17746	0.981
SLC40A1	-4.68	8	-1.18	0.119	1531	0.939	0.881	16514	0.963	-4.57	8	-1.33	0.0913	956	0.91	0.909	17089	0.959
IKZF4	-4.67	8	-1.18	0.119	1532	0.939	0.881	16513	0.963	0.62	8	0.32	0.624	12357	0.91	0.376	5688	0.944
FAM83H	-4.67	8	-1.18	0.119	1533	0.939	0.881	16512	0.963	1.61	8	0.63	0.735	14406	0.92	0.265	3639	0.944
E2F8	-4.67	8	-1.18	0.119	1534	0.939	0.881	16511	0.963	2.54	8	0.92	0.822	15837	0.936	0.178	2208	0.944
RABAC1	-4.67	8	-1.18	0.119	1535	0.939	0.881	16510	0.963	-0.9	8	-0.17	0.434	7991	0.91	0.566	10054	0.944
SV2A	-4.67	8	-1.18	0.119	1536	0.939	0.881	16509	0.963	-2.62	8	-0.71	0.238	3527	0.91	0.762	14518	0.944
SMARCA5	-4.67	8	-1.18	0.119	1537	0.939	0.881	16508	0.963	-3.19	8	-0.89	0.185	2488	0.91	0.815	15557	0.945
PRSS57	-4.67	8	-1.18	0.119	1538	0.939	0.881	16507	0.963	-3.07	8	-0.86	0.196	2698	0.91	0.804	15347	0.944
PRODH	-4.67	8	-1.18	0.119	1539	0.939	0.881	16506	0.963	-5.16	8	-1.52	0.0644	608	0.91	0.936	17437	0.968
ASB11	-4.66	8	-1.18	0.12	1540	0.939	0.88	16505	0.963	-2.77	8	-0.76	0.224	3243	0.91	0.776	14802	0.944
ZWINT	-4.66	8	-1.18	0.12	1541	0.939	0.88	16504	0.962	-0.56	8	-0.06	0.476	9019	0.91	0.524	9026	0.944
FAM120AOS	-4.66	8	-1.18	0.12	1542	0.939	0.88	16503	0.962	-0.69	8	-0.1	0.46	8624	0.91	0.54	9421	0.944
WDR77	-4.36	7	-1.18	0.12	1543	0.939	0.88	16502	0.962	-3.14	6	-1.03	0.151	1906	0.91	0.849	16139	0.949
ANKRD13A	-4.66	8	-1.18	0.12	1544	0.939	0.88	16501	0.962	0.85	8	0.39	0.651	12904	0.91	0.349	5141	0.944
COTL1	-4.65	8	-1.17	0.12	1545	0.939	0.88	16500	0.962	-1.28	8	-0.29	0.386	6883	0.91	0.614	11162	0.944
CBR4	-4.65	8	-1.17	0.12	1546	0.939	0.88	16499	0.962	-2.4	8	-0.64	0.26	4020	0.91	0.74	14025	0.944
GCNT1	-4.65	8	-1.17	0.12	1547	0.939	0.88	16498	0.962	-2.72	8	-0.74	0.228	3329	0.91	0.772	14716	0.944
LETMD1	-4.65	8	-1.17	0.12	1548	0.939	0.88	16497	0.962	-5.52	8	-1.63	0.0513	468	0.91	0.949	17577	0.974
SYT11	-4.65	8	-1.17	0.12	1549	0.939	0.88	16496	0.962	-0.26	8	0.03	0.514	9868	0.91	0.486	8177	0.944
IL25	-4.65	8	-1.17	0.12	1550	0.939	0.88	16495	0.962	-0.39	8	0	0.498	9505	0.91	0.502	8540	0.944
ZNF112	-4.65	8	-1.17	0.12	1551	0.939	0.88	16494	0.962	1.94	8	0.73	0.768	15007	0.924	0.232	3038	0.944
AK7	-4.65	8	-1.17	0.12	1552	0.939	0.88	16493	0.962	-3.44	8	-0.97	0.165	2132	0.91	0.835	15913	0.947
ADAM20	-4.65	8	-1.17	0.12	1553	0.939	0.88	16492	0.962	-1.17	8	-0.25	0.4	7225	0.91	0.6	10820	0.944
NUBPL	-4.65	8	-1.17	0.12	1554	0.939	0.88	16491	0.962	-2.1	8	-0.55	0.292	4751	0.91	0.708	13294	0.944
SH3TC2	-4.64	8	-1.17	0.121	1555	0.939	0.879	16490	0.962	0.51	8	0.28	0.61	12074	0.91	0.39	5971	0.944
CD74	-4.64	8	-1.17	0.121	1556	0.939	0.879	16489	0.962	-3.73	8	-1.07	0.143	1773	0.91	0.857	16272	0.95
MYDGF	-4.64	8	-1.17	0.121	1557	0.939	0.879	16488	0.962	0.99	8	0.43	0.667	13212	0.91	0.333	4833	0.944
DFFA	-4.64	8	-1.17	0.121	1558	0.939	0.879	16487	0.962	-1.14	8	-0.24	0.404	7293	0.91	0.596	10752	0.944
BBS1	-4.64	8	-1.17	0.121	1559	0.939	0.879	16486	0.962	-1.48	8	-0.35	0.363	6333	0.91	0.637	11712	0.944
LINC01545	-4.64	8	-1.17	0.121	1560	0.939	0.879	16485	0.962	-2.4	8	-0.64	0.26	4027	0.91	0.74	14018	0.944
PGM2L1	-4.64	8	-1.17	0.121	1561	0.939	0.879	16484	0.962	-0.2	8	0.05	0.522	10069	0.91	0.478	7976	0.944
ZNF764	-4.64	8	-1.17	0.121	1562	0.939	0.879	16483	0.962	-0.79	8	-0.13	0.447	8318	0.91	0.553	9727	0.944
IRF2BP2	-4.64	8	-1.17	0.121	1563	0.939	0.879	16482	0.962	-0.98	8	-0.19	0.424	7746	0.91	0.576	10299	0.944
CCR1	-4.64	8	-1.17	0.121	1564	0.939	0.879	16481	0.962	-1.13	8	-0.24	0.405	7324	0.91	0.595	10721	0.944
MTRF1	-4.63	8	-1.17	0.121	1565	0.939	0.879	16480	0.962	-1.72	8	-0.43	0.334	5688	0.91	0.666	12357	0.944
KIF3B	-4.63	8	-1.17	0.121	1566	0.939	0.879	16479	0.962	-5.84	8	-1.73	0.0414	361	0.91	0.959	17684	0.978
NFATC2IP	-4.63	8	-1.17	0.121	1567	0.939	0.879	16478	0.962	-4.7	8	-1.37	0.0849	865	0.91	0.915	17180	0.961
DGKG	-4.63	8	-1.17	0.121	1568	0.939	0.879	16477	0.962	-1.79	8	-0.45	0.326	5500	0.91	0.674	12545	0.944
FABP1	-4.63	8	-1.17	0.121	1569	0.939	0.879	16476	0.962	-0.39	8	-0.01	0.498	9501	0.91	0.502	8544	0.944
SRPX2	-4.63	8	-1.17	0.121	1570	0.939	0.879	16475	0.962	0.07	8	0.14	0.555	10849	0.91	0.445	7196	0.944
SYMPK	-4.01	6	-1.17	0.121	1571	0.939	0.879	16474	0.962	2.43	6	1.01	0.843	16147	0.942	0.157	1898	0.944
DUSP3	-4.63	8	-1.17	0.121	1572	0.939	0.879	16473	0.962	-2.61	8	-0.71	0.238	3544	0.91	0.762	14501	0.944
FEZF1	-4.63	8	-1.17	0.121	1573	0.939	0.879	16472	0.962	-4.01	8	-1.16	0.124	1425	0.91	0.876	16620	0.951
GOLGA6L2	-4.62	8	-1.17	0.122	1574	0.939	0.878	16471	0.962	2.1	8	0.78	0.783	15270	0.926	0.217	2775	0.944
RRAS2	-4.62	8	-1.17	0.122	1575	0.939	0.878	16470	0.962	-4.64	8	-1.35	0.0881	899	0.91	0.912	17146	0.96
TBC1D23	-4.62	8	-1.17	0.122	1576	0.939	0.878	16469	0.962	-3.02	8	-0.84	0.201	2781	0.91	0.799	15264	0.944
ERGIC1	-4.62	8	-1.17	0.122	1577	0.939	0.878	16468	0.962	-3.37	8	-0.95	0.171	2213	0.91	0.829	15832	0.945
RRP15	-4.62	8	-1.17	0.122	1578	0.939	0.878	16467	0.962	1.31	8	0.53	0.703	13862	0.915	0.297	4183	0.944
ACY1	-4.62	8	-1.16	0.122	1579	0.939	0.878	16466	0.962	-4.35	8	-1.26	0.104	1129	0.91	0.896	16916	0.956
CSNK1G2	-4.62	8	-1.16	0.122	1580	0.939	0.878	16465	0.962	-3.36	8	-0.95	0.172	2229	0.91	0.828	15816	0.945
DTNB	-4.62	8	-1.16	0.122	1581	0.939	0.878	16464	0.962	-3.54	8	-1.01	0.157	2003	0.91	0.843	16042	0.948
PEBP1	-4.61	8	-1.16	0.122	1582	0.939	0.878	16463	0.962	-1.92	8	-0.49	0.311	5158	0.91	0.689	12887	0.944
PYURF	-4.61	8	-1.16	0.122	1583	0.939	0.878	16462	0.962	-4.87	8	-1.43	0.0766	754	0.91	0.923	17291	0.963
COLCA2	-4.61	8	-1.16	0.122	1584	0.939	0.878	16461	0.962	-5.28	8	-1.56	0.0597	559	0.91	0.94	17486	0.97
RND2	-4.6	8	-1.16	0.123	1585	0.939	0.877	16460	0.962	-1.81	8	-0.46	0.325	5470	0.91	0.675	12575	0.944
SEPTIN8	-4.6	8	-1.16	0.123	1586	0.939	0.877	16459	0.962	-2.62	8	-0.71	0.238	3531	0.91	0.762	14514	0.944
CNOT10	-4.6	8	-1.16	0.123	1587	0.939	0.877	16458	0.962	9.56	8	3.15	0.999	17883	1	0.000817	162	0.091
GUCA2B	-4.6	8	-1.16	0.123	1588	0.939	0.877	16457	0.962	-4.95	8	-1.45	0.0734	711	0.91	0.927	17334	0.965
SLTM	-4.6	8	-1.16	0.123	1589	0.939	0.877	16456	0.962	1.37	8	0.55	0.71	13996	0.915	0.29	4049	0.944
AAMDC	-4.6	8	-1.16	0.123	1590	0.939	0.877	16455	0.962	-1.71	8	-0.42	0.336	5728	0.91	0.664	12317	0.944
TTLL13P	-4.6	8	-1.16	0.123	1591	0.939	0.877	16454	0.962	-1.81	8	-0.46	0.324	5467	0.91	0.676	12578	0.944
RNF181	-4.6	8	-1.16	0.123	1592	0.939	0.877	16453	0.962	-2.55	8	-0.69	0.245	3684	0.91	0.755	14361	0.944
TSPEAR	-4.6	8	-1.16	0.123	1593	0.939	0.877	16452	0.962	-2.23	8	-0.59	0.278	4444	0.91	0.722	13601	0.944
SPR	-4.59	8	-1.16	0.123	1594	0.939	0.877	16451	0.962	-1.38	8	-0.32	0.375	6607	0.91	0.625	11438	0.944
PANK4	-4.59	8	-1.16	0.123	1595	0.939	0.877	16450	0.962	-2.49	8	-0.67	0.251	3825	0.91	0.749	14220	0.944
EFCAB2	-4.59	8	-1.16	0.123	1596	0.939	0.877	16449	0.962	-3.43	8	-0.97	0.166	2147	0.91	0.834	15898	0.946
KLF15	-4.59	8	-1.16	0.123	1597	0.939	0.877	16448	0.962	-1.43	8	-0.34	0.368	6455	0.91	0.632	11590	0.944
UQCC1	-4.59	8	-1.16	0.123	1598	0.939	0.877	16447	0.962	-4.75	8	-1.39	0.0824	822	0.91	0.918	17223	0.961
FCSK	-4.59	8	-1.16	0.124	1599	0.939	0.876	16446	0.962	-1.81	8	-0.46	0.324	5460	0.91	0.676	12585	0.944
MBD2	-4.59	8	-1.16	0.124	1600	0.939	0.876	16445	0.962	-5.9	8	-1.75	0.0397	343	0.91	0.96	17702	0.979
OR51J1	-4.59	8	-1.16	0.124	1601	0.939	0.876	16444	0.962	-1.98	8	-0.51	0.304	5018	0.91	0.696	13027	0.944
CYB5R3	-4.59	8	-1.16	0.124	1602	0.939	0.876	16443	0.962	-1.16	8	-0.25	0.401	7257	0.91	0.599	10788	0.944
BLOC1S3	-4.58	8	-1.16	0.124	1603	0.939	0.876	16442	0.962	-1.91	8	-0.49	0.313	5195	0.91	0.687	12850	0.944
SEMA5A	-4.58	8	-1.16	0.124	1604	0.939	0.876	16441	0.962	-2.13	8	-0.56	0.289	4671	0.91	0.711	13374	0.944
RAD23B	-4.58	8	-1.16	0.124	1605	0.939	0.876	16440	0.962	1.52	8	0.6	0.725	14241	0.919	0.275	3804	0.944
GTF2B	-4.58	8	-1.16	0.124	1606	0.939	0.876	16439	0.962	0.56	7	0.31	0.621	12291	0.91	0.379	5754	0.944
WFDC6	-4.58	8	-1.15	0.124	1607	0.939	0.876	16438	0.962	-3.74	8	-1.07	0.143	1762	0.91	0.857	16283	0.95
SLC38A10	-4.58	8	-1.15	0.124	1608	0.939	0.876	16437	0.962	-3.55	8	-1.01	0.156	1987	0.91	0.844	16058	0.948
ITGBL1	-4.58	8	-1.15	0.124	1609	0.939	0.876	16436	0.961	-1.11	8	-0.24	0.407	7367	0.91	0.593	10678	0.944
IGFALS	-4.58	8	-1.15	0.124	1610	0.939	0.876	16435	0.961	-2.79	8	-0.77	0.222	3207	0.91	0.778	14838	0.944
SDCBP2	-4.58	8	-1.15	0.124	1611	0.939	0.876	16434	0.961	-4.19	8	-1.21	0.113	1250	0.91	0.887	16795	0.953
CKB	-4.57	8	-1.15	0.124	1612	0.939	0.876	16433	0.961	-3.08	8	-0.86	0.195	2690	0.91	0.805	15355	0.944
TOR1B	-4.57	8	-1.15	0.125	1613	0.939	0.875	16432	0.961	1.42	8	0.57	0.715	14062	0.917	0.285	3983	0.944
SPAG7	-4.57	8	-1.15	0.125	1614	0.939	0.875	16431	0.961	4.95	8	1.69	0.954	17345	0.993	0.0459	700	0.944
HOXB9	-4.57	8	-1.15	0.125	1615	0.939	0.875	16430	0.961	1.69	8	0.65	0.743	14566	0.921	0.257	3479	0.944
CDK7	-3.96	6	-1.15	0.125	1616	0.939	0.875	16429	0.961	-3.05	6	-1	0.159	2032	0.91	0.841	16013	0.947
KLF11	-4.57	8	-1.15	0.125	1617	0.939	0.875	16428	0.961	-3.59	8	-1.02	0.153	1948	0.91	0.847	16097	0.949
CC2D1B	-4.57	8	-1.15	0.125	1618	0.939	0.875	16427	0.961	-0.9	8	-0.17	0.433	7981	0.91	0.567	10064	0.944
C12orf66	-4.57	8	-1.15	0.125	1619	0.939	0.875	16426	0.961	-5.18	8	-1.53	0.0635	596	0.91	0.937	17449	0.968
MARS1	-3.95	6	-1.15	0.125	1620	0.939	0.875	16425	0.961	-2.25	8	-0.6	0.276	4361	0.91	0.724	13684	0.944
CENPB	-4.56	8	-1.15	0.125	1621	0.939	0.875	16424	0.961	-4.74	8	-1.39	0.0828	831	0.91	0.917	17214	0.961
FBP1	-4.56	8	-1.15	0.125	1622	0.939	0.875	16423	0.961	-3.85	8	-1.1	0.135	1620	0.91	0.865	16425	0.95
CXCL13	-4.56	8	-1.15	0.125	1623	0.939	0.875	16422	0.961	-1.2	8	-0.26	0.396	7131	0.91	0.604	10914	0.944
U82695.9	-4.56	8	-1.15	0.125	1624	0.939	0.875	16421	0.961	-3.1	8	-0.86	0.194	2651	0.91	0.806	15394	0.944
TUSC1	-4.55	8	-1.15	0.126	1625	0.939	0.874	16420	0.961	-3.74	8	-1.07	0.143	1760	0.91	0.857	16285	0.95
TAF7L	-4.55	8	-1.15	0.126	1626	0.939	0.874	16419	0.961	0.23	8	0.19	0.575	11310	0.91	0.425	6735	0.944
TACR1	-4.55	8	-1.15	0.126	1627	0.939	0.874	16418	0.961	-4.49	8	-1.31	0.0959	1012	0.91	0.904	17033	0.958
JAZF1	-4.55	8	-1.15	0.126	1628	0.939	0.874	16417	0.961	-4.61	8	-1.34	0.0893	924	0.91	0.911	17121	0.96
PTCHD1	-4.54	8	-1.15	0.126	1629	0.939	0.874	16416	0.961	-0.88	8	-0.16	0.435	8027	0.91	0.565	10018	0.944
NCKAP5L	-4.54	8	-1.14	0.126	1630	0.939	0.874	16415	0.961	-3.55	8	-1.01	0.157	1992	0.91	0.843	16053	0.948
SLC22A15	-4.53	8	-1.14	0.127	1631	0.939	0.873	16414	0.96	-1.32	8	-0.3	0.381	6768	0.91	0.619	11277	0.944
TOX3	-4.53	8	-1.14	0.127	1632	0.939	0.873	16413	0.96	-0.55	8	-0.06	0.477	9041	0.91	0.523	9004	0.944
NCF4	-4.53	8	-1.14	0.127	1633	0.939	0.873	16412	0.96	-1.3	8	-0.29	0.384	6832	0.91	0.616	11213	0.944
KHDC1L	-4.53	8	-1.14	0.127	1634	0.939	0.873	16411	0.96	-2.89	8	-0.8	0.213	3034	0.91	0.787	15011	0.944
LHFPL3	-4.53	8	-1.14	0.127	1635	0.939	0.873	16410	0.96	-3.11	8	-0.87	0.192	2621	0.91	0.808	15424	0.944
TRIB3	-4.53	8	-1.14	0.127	1636	0.939	0.873	16409	0.96	-3	8	-0.83	0.202	2815	0.91	0.798	15230	0.944
APEH	-4.53	8	-1.14	0.127	1637	0.939	0.873	16408	0.96	0.76	8	0.36	0.641	12690	0.91	0.359	5355	0.944
CROCC	-4.53	8	-1.14	0.127	1638	0.939	0.873	16407	0.96	1.04	8	0.45	0.672	13324	0.91	0.328	4721	0.944
MRPL3	-4.53	8	-1.14	0.127	1639	0.939	0.873	16406	0.96	-2.03	8	-0.53	0.299	4919	0.91	0.701	13126	0.944
MAT2B	-4.53	8	-1.14	0.127	1640	0.939	0.873	16405	0.96	-1.31	8	-0.3	0.383	6810	0.91	0.617	11235	0.944
KIN	-4.53	8	-1.14	0.127	1641	0.939	0.873	16404	0.96	-3.27	8	-0.92	0.179	2371	0.91	0.821	15674	0.945
ABAT	-4.53	8	-1.14	0.127	1642	0.939	0.873	16403	0.96	-0.97	8	-0.19	0.425	7762	0.91	0.575	10283	0.944
RS1	-4.52	8	-1.14	0.127	1643	0.939	0.873	16402	0.96	-2.43	8	-0.65	0.257	3946	0.91	0.743	14099	0.944
VASH2	-4.52	8	-1.14	0.127	1644	0.939	0.873	16401	0.96	0.69	8	0.34	0.632	12520	0.91	0.368	5525	0.944
MMP9	-4.52	8	-1.14	0.127	1645	0.939	0.873	16400	0.96	-6.54	8	-1.96	0.0252	216	0.91	0.975	17829	0.986
ZNF83	-4.52	8	-1.14	0.127	1646	0.939	0.873	16399	0.96	-2.39	8	-0.64	0.261	4048	0.91	0.739	13997	0.944
NAGS	-4.52	8	-1.14	0.128	1647	0.939	0.872	16398	0.96	-1.16	8	-0.25	0.401	7251	0.91	0.599	10794	0.944
CRELD2	-4.51	8	-1.14	0.128	1648	0.939	0.872	16397	0.96	-1.46	8	-0.35	0.365	6369	0.91	0.635	11676	0.944
GATB	-4.51	8	-1.14	0.128	1649	0.939	0.872	16396	0.96	0	8	0.12	0.547	10676	0.91	0.453	7369	0.944
KCTD8	-4.51	8	-1.14	0.128	1650	0.939	0.872	16395	0.96	-2.06	8	-0.54	0.296	4861	0.91	0.704	13184	0.944
MPHOSPH9	-4.51	8	-1.14	0.128	1651	0.939	0.872	16394	0.96	-1.03	8	-0.21	0.417	7591	0.91	0.583	10454	0.944
SRSF1	-4.22	7	-1.14	0.128	1652	0.939	0.872	16393	0.96	-0.43	7	-0.03	0.488	9307	0.91	0.512	8738	0.944
PLEKHH3	-4.51	8	-1.14	0.128	1653	0.939	0.872	16392	0.96	-4.94	8	-1.45	0.0735	714	0.91	0.927	17331	0.965
ZBTB14	-4.5	8	-1.13	0.128	1654	0.939	0.872	16391	0.96	3.19	8	1.13	0.871	16505	0.952	0.129	1540	0.944
SPATA31D1	-4.5	8	-1.13	0.128	1655	0.939	0.872	16390	0.96	-1.24	8	-0.27	0.392	7015	0.91	0.608	11030	0.944
CNDP2	-4.5	8	-1.13	0.128	1656	0.939	0.872	16389	0.96	-0.82	8	-0.14	0.444	8230	0.91	0.556	9815	0.944
TFPI2	-4.5	8	-1.13	0.129	1657	0.939	0.871	16388	0.96	-2.41	8	-0.65	0.259	3995	0.91	0.741	14050	0.944
MFSD9	-4.5	8	-1.13	0.129	1658	0.939	0.871	16387	0.96	-1.83	8	-0.46	0.322	5396	0.91	0.678	12649	0.944
TCHHL1	-4.5	8	-1.13	0.129	1659	0.939	0.871	16386	0.96	1.73	8	0.66	0.747	14631	0.921	0.253	3414	0.944
DUSP2	-4.5	8	-1.13	0.129	1660	0.939	0.871	16385	0.96	-4.48	8	-1.3	0.0965	1021	0.91	0.903	17024	0.958
NUPR1	-4.5	8	-1.13	0.129	1661	0.939	0.871	16384	0.96	-2.7	8	-0.74	0.23	3362	0.91	0.77	14683	0.944
OR2M2	-2.25	2	-1.13	0.129	1662	0.939	0.871	16383	0.96	-1.41	2	-0.78	0.218	3146	0.91	0.782	14899	0.944
PCDHGB4	-4.49	8	-1.13	0.129	1663	0.939	0.871	16382	0.959	-0.18	8	0.06	0.524	10137	0.91	0.476	7908	0.944
CCL26	-4.49	8	-1.13	0.129	1664	0.939	0.871	16381	0.959	-0.21	8	0.05	0.521	10055	0.91	0.479	7990	0.944
SELENOS	-4.49	8	-1.13	0.129	1665	0.939	0.871	16380	0.959	-3.04	8	-0.85	0.198	2745	0.91	0.802	15300	0.944
CLEC19A	-4.49	8	-1.13	0.129	1666	0.939	0.871	16379	0.959	-1.2	8	-0.26	0.396	7124	0.91	0.604	10921	0.944
TNFSF9	-4.49	8	-1.13	0.129	1667	0.939	0.871	16378	0.959	-0.93	8	-0.18	0.429	7884	0.91	0.571	10161	0.944
FASTKD5	-4.49	8	-1.13	0.129	1668	0.939	0.871	16377	0.959	-2.55	8	-0.69	0.245	3678	0.91	0.755	14367	0.944
PPP1R16A	-4.49	8	-1.13	0.129	1669	0.939	0.871	16376	0.959	-4.45	8	-1.29	0.0979	1046	0.91	0.902	16999	0.957
TMC1	-4.49	8	-1.13	0.129	1670	0.939	0.871	16375	0.959	-5.01	8	-1.47	0.0707	682	0.91	0.929	17363	0.966
ELFN2	-4.49	8	-1.13	0.129	1671	0.939	0.871	16374	0.959	-2.03	8	-0.53	0.299	4909	0.91	0.701	13136	0.944
CEACAM19	-4.49	8	-1.13	0.129	1672	0.939	0.871	16373	0.959	-3.62	8	-1.03	0.151	1913	0.91	0.849	16132	0.949
PHETA1	-4.49	8	-1.13	0.129	1673	0.939	0.871	16372	0.959	-2.34	8	-0.62	0.266	4146	0.91	0.734	13899	0.944
TOX	-4.49	8	-1.13	0.129	1674	0.939	0.871	16371	0.959	-3.13	8	-0.87	0.191	2596	0.91	0.809	15449	0.944
EFNB1	-4.48	8	-1.13	0.129	1675	0.939	0.871	16370	0.959	-0.34	8	0.01	0.504	9656	0.91	0.496	8389	0.944
ASB10	-4.48	8	-1.13	0.129	1676	0.939	0.871	16369	0.959	-3.29	8	-0.93	0.177	2332	0.91	0.823	15713	0.945
PCNX3	-4.48	8	-1.13	0.13	1677	0.939	0.87	16368	0.959	-2.51	8	-0.68	0.249	3769	0.91	0.751	14276	0.944
SCUBE1	-4.48	8	-1.13	0.13	1678	0.939	0.87	16367	0.959	-1.63	8	-0.4	0.345	5945	0.91	0.655	12100	0.944
ZDHHC8	-4.48	8	-1.13	0.13	1679	0.939	0.87	16366	0.959	-3.79	8	-1.08	0.139	1693	0.91	0.861	16352	0.95
CNGA4	-4.48	8	-1.13	0.13	1680	0.939	0.87	16365	0.959	-0.67	8	-0.1	0.462	8676	0.91	0.538	9369	0.944
ZNF660	-4.48	8	-1.13	0.13	1681	0.939	0.87	16364	0.959	-2.38	8	-0.64	0.262	4066	0.91	0.738	13979	0.944
B9D2	-4.48	8	-1.13	0.13	1682	0.939	0.87	16363	0.959	-1.59	8	-0.39	0.349	6020	0.91	0.651	12025	0.944
TMEM170A	-4.48	8	-1.13	0.13	1683	0.939	0.87	16362	0.959	-2.79	8	-0.77	0.222	3204	0.91	0.778	14841	0.944
PHGR1	-4.48	8	-1.13	0.13	1684	0.939	0.87	16361	0.959	-6.05	8	-1.8	0.0358	305	0.91	0.964	17740	0.981
USP18	-4.48	8	-1.13	0.13	1685	0.939	0.87	16360	0.959	-4.13	8	-1.19	0.116	1305	0.91	0.884	16740	0.952
GUK1	-4.47	8	-1.13	0.13	1686	0.939	0.87	16359	0.959	-1.73	8	-0.43	0.333	5670	0.91	0.667	12375	0.944
IL13RA1	-4.47	8	-1.13	0.13	1687	0.939	0.87	16358	0.959	-2.67	8	-0.73	0.233	3415	0.91	0.767	14630	0.944
PRAME	-4.47	8	-1.13	0.13	1688	0.939	0.87	16357	0.959	-1.77	8	-0.44	0.329	5561	0.91	0.671	12484	0.944
GSE1	-4.47	8	-1.13	0.13	1689	0.939	0.87	16356	0.959	-5.95	8	-1.77	0.0385	330	0.91	0.962	17715	0.979
PEG3	-4.47	8	-1.12	0.13	1690	0.939	0.87	16355	0.959	-1.91	8	-0.49	0.313	5199	0.91	0.687	12846	0.944
PNPT1	-4.47	8	-1.12	0.13	1691	0.939	0.87	16354	0.959	2.26	8	0.83	0.797	15474	0.93	0.203	2571	0.944
INSRR	-4.46	8	-1.12	0.131	1692	0.939	0.869	16353	0.959	-2.55	8	-0.69	0.244	3668	0.91	0.756	14377	0.944
NDUFV1	-4.46	8	-1.12	0.131	1693	0.939	0.869	16352	0.959	-1.28	8	-0.29	0.386	6886	0.91	0.614	11159	0.944
AMOTL2	-4.46	8	-1.12	0.131	1694	0.939	0.869	16351	0.959	1.55	8	0.61	0.729	14317	0.919	0.271	3728	0.944
NUP88	-4.46	8	-1.12	0.131	1695	0.939	0.869	16350	0.959	-3.89	8	-1.12	0.132	1577	0.91	0.868	16468	0.951
ASB4	-4.46	8	-1.12	0.131	1696	0.939	0.869	16349	0.959	-3.02	8	-0.84	0.201	2783	0.91	0.799	15262	0.944
MRPS25	-4.46	8	-1.12	0.131	1697	0.939	0.869	16348	0.959	-4.15	8	-1.2	0.115	1287	0.91	0.885	16758	0.953
HDAC2	-4.46	8	-1.12	0.131	1698	0.939	0.869	16347	0.959	-3.91	8	-1.12	0.131	1561	0.91	0.869	16484	0.951
WDR25	-4.17	7	-1.12	0.131	1699	0.939	0.869	16346	0.959	-1.43	8	-0.34	0.368	6458	0.91	0.632	11587	0.944
UPF3A	-4.45	8	-1.12	0.131	1700	0.939	0.869	16345	0.959	-4.35	8	-1.26	0.103	1118	0.91	0.897	16927	0.956
HYI	-4.45	8	-1.12	0.131	1701	0.939	0.869	16344	0.959	-0.8	8	-0.14	0.446	8293	0.91	0.554	9752	0.944
SLC26A6	-4.45	8	-1.12	0.131	1702	0.939	0.869	16343	0.959	3.76	8	1.31	0.905	16900	0.966	0.095	1145	0.944
CASQ1	-4.45	8	-1.12	0.131	1703	0.939	0.869	16342	0.959	-0.54	8	-0.05	0.479	9079	0.91	0.521	8966	0.944
OR6C65	-4.45	8	-1.12	0.132	1704	0.939	0.868	16341	0.959	-6.95	8	-2.09	0.0184	144	0.91	0.982	17901	0.989
TIMELESS	-3.51	5	-1.12	0.132	1705	0.939	0.868	16340	0.959	-1.71	4	-0.65	0.258	3988	0.91	0.742	14057	0.944
CCT6A	-2.72	3	-1.12	0.132	1706	0.939	0.868	16339	0.959	0.07	3	0.15	0.561	10999	0.91	0.439	7046	0.944
OR4N5	-4.44	8	-1.12	0.132	1707	0.939	0.868	16338	0.959	-4.47	8	-1.3	0.0966	1022	0.91	0.903	17023	0.958
CHCHD3	-4.44	8	-1.12	0.132	1708	0.939	0.868	16337	0.959	-1.11	8	-0.23	0.408	7388	0.91	0.592	10657	0.944
REPS2	-4.44	8	-1.12	0.132	1709	0.939	0.868	16336	0.959	-2.44	8	-0.66	0.256	3928	0.91	0.744	14117	0.944
SMAD4	-4.43	8	-1.12	0.132	1710	0.939	0.868	16335	0.959	-5.43	8	-1.61	0.0542	502	0.91	0.946	17543	0.973
SCGB2B2	-4.43	8	-1.12	0.132	1711	0.939	0.868	16334	0.959	-5.16	8	-1.52	0.0643	604	0.91	0.936	17441	0.968
LVRN	-4.43	8	-1.12	0.132	1712	0.939	0.868	16333	0.959	-1.26	8	-0.28	0.388	6940	0.91	0.612	11105	0.944
HLA-DOB	-4.43	8	-1.12	0.132	1713	0.939	0.868	16332	0.959	-0.07	8	0.1	0.538	10463	0.91	0.462	7582	0.944
CKLF	-4.43	8	-1.12	0.132	1714	0.939	0.868	16331	0.959	-1.77	8	-0.44	0.328	5546	0.91	0.672	12499	0.944
A3GALT2	-4.43	8	-1.12	0.132	1715	0.939	0.868	16330	0.959	-1.11	8	-0.23	0.408	7389	0.91	0.592	10656	0.944
SLIRP	-3.84	6	-1.12	0.132	1716	0.939	0.868	16329	0.959	-3.28	6	-1.08	0.139	1692	0.91	0.861	16353	0.95
CPSF4L	-4.43	8	-1.12	0.132	1717	0.939	0.868	16328	0.959	-3.48	8	-0.98	0.162	2080	0.91	0.838	15965	0.947
NABP2	-4.43	8	-1.11	0.133	1718	0.939	0.867	16327	0.959	1.02	8	0.44	0.67	13269	0.91	0.33	4776	0.944
SIPA1	-4.43	8	-1.11	0.133	1719	0.939	0.867	16326	0.959	-1.52	8	-0.37	0.357	6201	0.91	0.643	11844	0.944
SLC2A1	-4.43	8	-1.11	0.133	1720	0.939	0.867	16325	0.959	3.07	8	1.09	0.862	16399	0.949	0.138	1646	0.944
SAE1	-4.43	8	-1.11	0.133	1721	0.939	0.867	16324	0.959	-0.36	8	0	0.502	9588	0.91	0.498	8457	0.944
NUP37	-4.43	8	-1.11	0.133	1722	0.939	0.867	16323	0.959	0.49	8	0.27	0.607	12011	0.91	0.393	6034	0.944
WNT11	-4.42	8	-1.11	0.133	1723	0.939	0.867	16322	0.959	-1.99	8	-0.51	0.304	4999	0.91	0.696	13046	0.944
FGF19	-4.42	8	-1.11	0.133	1724	0.939	0.867	16321	0.959	-5.95	8	-1.77	0.0384	329	0.91	0.962	17716	0.979
WDR70	-3.83	6	-1.11	0.133	1725	0.939	0.867	16320	0.959	2.73	6	1.12	0.868	16475	0.951	0.132	1570	0.944
ZP1	-4.42	8	-1.11	0.133	1726	0.939	0.867	16319	0.959	-1.52	8	-0.37	0.357	6207	0.91	0.643	11838	0.944
BPIFB1	-4.42	8	-1.11	0.133	1727	0.939	0.867	16318	0.959	-1.59	8	-0.39	0.349	6018	0.91	0.651	12027	0.944
GPD1L	-4.42	8	-1.11	0.133	1728	0.939	0.867	16317	0.959	-3.73	8	-1.07	0.143	1775	0.91	0.857	16270	0.95
WNK1	-4.42	8	-1.11	0.133	1729	0.939	0.867	16316	0.959	-1.11	8	-0.23	0.407	7377	0.91	0.593	10668	0.944
KDM5D	-4.42	8	-1.11	0.133	1730	0.939	0.867	16315	0.959	-1.1	8	-0.23	0.408	7392	0.91	0.592	10653	0.944
ASXL1	-4.42	8	-1.11	0.133	1731	0.939	0.867	16314	0.959	2.6	8	0.94	0.827	15903	0.938	0.173	2142	0.944
QRFP	-4.41	8	-1.11	0.133	1732	0.939	0.867	16313	0.959	-3.05	8	-0.85	0.198	2734	0.91	0.802	15311	0.944
LKAAEAR1	-4.41	8	-1.11	0.133	1733	0.939	0.867	16312	0.959	-0.8	8	-0.14	0.446	8291	0.91	0.554	9754	0.944
UVSSA	-4.41	8	-1.11	0.134	1734	0.939	0.866	16311	0.959	-3.8	8	-1.09	0.138	1676	0.91	0.862	16369	0.95
HEY1	-4.41	8	-1.11	0.134	1735	0.939	0.866	16310	0.958	-2.65	8	-0.72	0.235	3449	0.91	0.765	14596	0.944
RDH5	-4.41	8	-1.11	0.134	1736	0.939	0.866	16309	0.958	-4.03	8	-1.16	0.123	1407	0.91	0.877	16638	0.951
GKN2	-4.4	8	-1.11	0.134	1737	0.939	0.866	16308	0.958	-4.27	8	-1.24	0.108	1190	0.91	0.892	16855	0.955
URI1	-4.4	8	-1.11	0.134	1738	0.939	0.866	16307	0.958	-1.82	8	-0.46	0.323	5447	0.91	0.677	12598	0.944
FAM110B	-4.4	8	-1.11	0.134	1739	0.939	0.866	16306	0.958	-3.21	8	-0.9	0.184	2468	0.91	0.816	15577	0.945
CCDC87	-4.4	8	-1.11	0.134	1740	0.939	0.866	16305	0.958	-4.46	8	-1.3	0.0973	1036	0.91	0.903	17009	0.957
ADRA2A	-4.4	8	-1.11	0.134	1741	0.939	0.866	16304	0.958	-2.46	8	-0.66	0.253	3876	0.91	0.747	14169	0.944
TEX44	-4.4	8	-1.11	0.134	1742	0.939	0.866	16303	0.958	-6.24	8	-1.86	0.0313	275	0.91	0.969	17770	0.984
OR7C2	-4.4	8	-1.11	0.134	1743	0.939	0.866	16302	0.958	-2.64	8	-0.72	0.236	3500	0.91	0.764	14545	0.944
PTGES2	-4.39	8	-1.11	0.134	1744	0.939	0.866	16301	0.958	-4.28	8	-1.24	0.107	1179	0.91	0.893	16866	0.955
LEMD2	-4.39	8	-1.11	0.134	1745	0.939	0.866	16300	0.958	-2.97	8	-0.82	0.205	2883	0.91	0.795	15162	0.944
FAM183BP	-4.39	8	-1.11	0.135	1746	0.939	0.865	16299	0.958	-3.63	8	-1.03	0.151	1899	0.91	0.849	16146	0.949
EXOC3	-4.39	8	-1.11	0.135	1747	0.939	0.865	16298	0.958	-2.18	8	-0.57	0.283	4549	0.91	0.717	13496	0.944
DOK7	-4.39	8	-1.1	0.135	1748	0.939	0.865	16297	0.958	-2.54	8	-0.69	0.246	3703	0.91	0.754	14342	0.944
THSD7B	-4.39	8	-1.1	0.135	1749	0.939	0.865	16296	0.958	0.33	8	0.22	0.588	11581	0.91	0.412	6464	0.944
TENT5B	-4.39	8	-1.1	0.135	1750	0.939	0.865	16295	0.958	-5.59	8	-1.65	0.049	445	0.91	0.951	17600	0.975
OTULINL	-4.39	8	-1.1	0.135	1751	0.939	0.865	16294	0.958	-0.83	8	-0.14	0.442	8203	0.91	0.558	9842	0.944
FDXACB1	-4.39	8	-1.1	0.135	1752	0.939	0.865	16293	0.958	-2.6	8	-0.71	0.24	3565	0.91	0.76	14480	0.944
LIMD1	-4.39	8	-1.1	0.135	1753	0.939	0.865	16292	0.958	-0.55	8	-0.06	0.478	9060	0.91	0.522	8985	0.944
VTCN1	-4.39	8	-1.1	0.135	1754	0.939	0.865	16291	0.958	-3.11	8	-0.87	0.193	2633	0.91	0.807	15412	0.944
OR13A1	-4.39	8	-1.1	0.135	1755	0.939	0.865	16290	0.958	-2.89	8	-0.8	0.212	3031	0.91	0.788	15014	0.944
NAT9	-4.38	8	-1.1	0.135	1756	0.939	0.865	16289	0.958	-2.84	8	-0.78	0.217	3117	0.91	0.783	14928	0.944
DBNDD2	-4.38	8	-1.1	0.135	1757	0.939	0.865	16288	0.958	-0.19	8	0.06	0.522	10090	0.91	0.478	7955	0.944
HERC1	-4.38	8	-1.1	0.135	1758	0.939	0.865	16287	0.958	-2.65	8	-0.72	0.235	3474	0.91	0.765	14571	0.944
GABRB1	-4.38	8	-1.1	0.135	1759	0.939	0.865	16286	0.958	-1.97	8	-0.51	0.306	5065	0.91	0.694	12980	0.944
SPPL3	-4.38	8	-1.1	0.135	1760	0.939	0.865	16285	0.958	-2.56	8	-0.69	0.244	3663	0.91	0.756	14382	0.944
TOB2	-4.38	8	-1.1	0.135	1761	0.939	0.865	16284	0.958	-1.2	8	-0.26	0.397	7138	0.91	0.603	10907	0.944
CCL25	-4.38	8	-1.1	0.135	1762	0.939	0.865	16283	0.958	-2.39	8	-0.64	0.26	4040	0.91	0.74	14005	0.944
TACO1	-4.38	8	-1.1	0.135	1763	0.939	0.865	16282	0.958	-6.31	8	-1.88	0.0298	263	0.91	0.97	17782	0.984
LAP3	-4.38	8	-1.1	0.135	1764	0.939	0.865	16281	0.958	-4.22	8	-1.22	0.111	1225	0.91	0.889	16820	0.954
SPRED1	-4.38	8	-1.1	0.136	1765	0.939	0.864	16280	0.958	-1.37	8	-0.32	0.375	6619	0.91	0.625	11426	0.944
DEXI	-4.38	8	-1.1	0.136	1766	0.939	0.864	16279	0.958	-3.51	8	-0.99	0.16	2043	0.91	0.84	16002	0.947
ACSM5	-4.37	8	-1.1	0.136	1767	0.939	0.864	16278	0.958	1.81	8	0.69	0.755	14790	0.921	0.245	3255	0.944
TSHZ3	-4.37	8	-1.1	0.136	1768	0.939	0.864	16277	0.958	-1.1	8	-0.23	0.409	7413	0.91	0.591	10632	0.944
DHCR24	-4.37	8	-1.1	0.136	1769	0.939	0.864	16276	0.958	-1.2	8	-0.26	0.396	7128	0.91	0.604	10917	0.944
ZNF556	-4.37	8	-1.1	0.136	1770	0.939	0.864	16275	0.958	-3.9	8	-1.12	0.132	1570	0.91	0.868	16475	0.951
BEST2	-4.37	8	-1.1	0.136	1771	0.939	0.864	16274	0.958	-1.57	8	-0.38	0.352	6101	0.91	0.648	11944	0.944
PCMTD2	-4.37	8	-1.1	0.136	1772	0.939	0.864	16273	0.958	-1.65	8	-0.4	0.343	5889	0.91	0.657	12156	0.944
TMEM79	-4.36	8	-1.1	0.136	1773	0.939	0.864	16272	0.958	-0.86	8	-0.15	0.439	8112	0.91	0.561	9933	0.944
CCDC13	-4.36	8	-1.1	0.136	1774	0.939	0.864	16271	0.958	-2.23	8	-0.59	0.278	4427	0.91	0.722	13618	0.944
SERPINA1	-4.36	8	-1.1	0.136	1775	0.939	0.864	16270	0.958	-0.42	8	-0.02	0.494	9403	0.91	0.506	8642	0.944
PAQR8	-4.36	8	-1.1	0.136	1776	0.939	0.864	16269	0.958	-3.07	8	-0.86	0.196	2702	0.91	0.804	15343	0.944
RASAL3	-4.36	8	-1.1	0.136	1777	0.939	0.864	16268	0.958	-0.54	8	-0.05	0.479	9095	0.91	0.521	8950	0.944
NLRC4	-4.36	8	-1.1	0.137	1778	0.939	0.863	16267	0.958	-4.51	8	-1.31	0.0949	1001	0.91	0.905	17044	0.958
THYN1	-4.36	8	-1.1	0.137	1779	0.939	0.863	16266	0.958	-3.27	8	-0.92	0.179	2367	0.91	0.821	15678	0.945
BMP8B	-2.18	2	-1.1	0.137	1780	0.939	0.863	16265	0.958	-2.05	2	-1.18	0.119	1354	0.91	0.881	16691	0.952
GPHA2	-4.35	8	-1.1	0.137	1781	0.939	0.863	16264	0.958	-2.23	8	-0.59	0.277	4421	0.91	0.723	13624	0.944
PLEKHA7	-4.35	8	-1.09	0.137	1782	0.939	0.863	16263	0.958	-1.14	8	-0.24	0.404	7307	0.91	0.596	10738	0.944
ZSWIM6	-4.35	8	-1.09	0.137	1783	0.939	0.863	16262	0.958	5.33	8	1.81	0.965	17440	0.998	0.0354	605	0.944
USP36	-4.35	8	-1.09	0.137	1784	0.939	0.863	16261	0.957	-4.97	8	-1.46	0.0723	698	0.91	0.928	17347	0.965
FAM168A	-4.35	8	-1.09	0.137	1785	0.939	0.863	16260	0.957	-5.59	8	-1.65	0.0491	446	0.91	0.951	17599	0.975
GNGT1	-4.35	8	-1.09	0.137	1786	0.939	0.863	16259	0.957	-0.96	8	-0.19	0.426	7788	0.91	0.574	10257	0.944
SOSTDC1	-4.34	8	-1.09	0.137	1787	0.939	0.863	16258	0.957	-3.24	8	-0.91	0.181	2416	0.91	0.819	15629	0.945
KAT8	-3.43	5	-1.09	0.137	1788	0.939	0.863	16257	0.957	-5.99	5	-2.29	0.0111	98	0.91	0.989	17947	0.994
NAP1L2	-4.34	8	-1.09	0.137	1789	0.939	0.863	16256	0.957	-4.09	8	-1.18	0.119	1357	0.91	0.881	16688	0.952
SLCO4A1	-4.34	8	-1.09	0.137	1790	0.939	0.863	16255	0.957	-2.16	8	-0.57	0.285	4591	0.91	0.715	13454	0.944
SIGLEC8	-4.34	8	-1.09	0.137	1791	0.939	0.863	16254	0.957	-5.01	8	-1.47	0.0704	677	0.91	0.93	17368	0.966
WNT7A	-4.34	8	-1.09	0.138	1792	0.939	0.862	16253	0.957	-2.92	8	-0.81	0.209	2964	0.91	0.791	15081	0.944
GTPBP3	-4.34	8	-1.09	0.138	1793	0.939	0.862	16252	0.957	-0.82	8	-0.14	0.444	8239	0.91	0.556	9806	0.944
TSC22D4	-4.34	8	-1.09	0.138	1794	0.939	0.862	16251	0.957	-4.59	8	-1.34	0.0904	947	0.91	0.91	17098	0.96
MRPS30	-4.34	8	-1.09	0.138	1795	0.939	0.862	16250	0.957	-3.05	8	-0.85	0.197	2729	0.91	0.803	15316	0.944
WBP2NL	-4.34	8	-1.09	0.138	1796	0.939	0.862	16249	0.957	-0.27	8	0.03	0.513	9853	0.91	0.487	8192	0.944
ID2	-4.33	8	-1.09	0.138	1797	0.939	0.862	16248	0.957	-3.36	8	-0.95	0.171	2224	0.91	0.829	15821	0.945
DPYS	-4.33	8	-1.09	0.138	1798	0.939	0.862	16247	0.957	-4.63	8	-1.35	0.0882	900	0.91	0.912	17145	0.96
FOXL1	-4.33	8	-1.09	0.138	1799	0.939	0.862	16246	0.957	-3.77	8	-1.08	0.14	1709	0.91	0.86	16336	0.95
METTL2A	-3.06	4	-1.09	0.138	1800	0.939	0.862	16245	0.957	-2.1	4	-0.82	0.205	2877	0.91	0.795	15168	0.944
SPP2	-4.33	8	-1.09	0.138	1801	0.939	0.862	16244	0.957	-4.83	8	-1.41	0.0786	780	0.91	0.921	17265	0.963
FRK	-4.33	8	-1.09	0.138	1802	0.939	0.862	16243	0.957	-4.11	8	-1.19	0.118	1339	0.91	0.882	16706	0.952
SLC35C1	-4.33	8	-1.09	0.138	1803	0.939	0.862	16242	0.957	-1.86	8	-0.47	0.319	5333	0.91	0.681	12712	0.944
MEA1	-4.33	8	-1.09	0.138	1804	0.939	0.862	16241	0.957	-3.49	8	-0.99	0.161	2060	0.91	0.839	15985	0.947
CUL4A	-4.33	8	-1.09	0.138	1805	0.939	0.862	16240	0.957	1.22	8	0.5	0.693	13716	0.912	0.307	4329	0.944
TEX19	-4.33	8	-1.09	0.138	1806	0.939	0.862	16239	0.957	1.31	8	0.53	0.703	13860	0.915	0.297	4185	0.944
SELENBP1	-4.33	8	-1.09	0.138	1807	0.939	0.862	16238	0.957	-1.83	8	-0.46	0.322	5394	0.91	0.678	12651	0.944
ZNF880	-4.33	8	-1.09	0.139	1808	0.939	0.861	16237	0.957	-2.45	8	-0.66	0.255	3909	0.91	0.745	14136	0.944
RO60	-4.32	8	-1.09	0.139	1809	0.939	0.861	16236	0.957	-1.17	8	-0.25	0.4	7230	0.91	0.6	10815	0.944
TSLP	-4.32	8	-1.09	0.139	1810	0.939	0.861	16235	0.957	-1.15	8	-0.25	0.402	7273	0.91	0.598	10772	0.944
PCDHA1	-4.32	8	-1.09	0.139	1811	0.939	0.861	16234	0.957	-2.32	8	-0.62	0.268	4186	0.91	0.732	13859	0.944
C17orf47	-4.32	8	-1.09	0.139	1812	0.939	0.861	16233	0.957	-0.24	8	0.04	0.517	9956	0.91	0.483	8089	0.944
ZNF598	-4.32	8	-1.09	0.139	1813	0.939	0.861	16232	0.957	0.41	8	0.25	0.598	11800	0.91	0.402	6245	0.944
TPCN2	-4.32	8	-1.09	0.139	1814	0.939	0.861	16231	0.957	-4.01	8	-1.15	0.124	1430	0.91	0.876	16615	0.951
LINC01554	-4.32	8	-1.09	0.139	1815	0.939	0.861	16230	0.957	-0.86	8	-0.16	0.438	8084	0.91	0.562	9961	0.944
ZNF281	-4.32	8	-1.08	0.139	1816	0.939	0.861	16229	0.957	-3.53	8	-1	0.158	2014	0.91	0.842	16031	0.947
FNDC3B	-4.32	8	-1.08	0.139	1817	0.939	0.861	16228	0.957	-5.06	8	-1.49	0.0683	650	0.91	0.932	17395	0.966
XIRP1	-4.32	8	-1.08	0.139	1818	0.939	0.861	16227	0.957	-0.71	8	-0.11	0.457	8571	0.91	0.543	9474	0.944
CD1A	-4.31	8	-1.08	0.139	1819	0.939	0.861	16226	0.957	-2.35	8	-0.63	0.265	4123	0.91	0.735	13922	0.944
ZC3HAV1L	-4.31	8	-1.08	0.139	1820	0.939	0.861	16225	0.957	-2.62	8	-0.71	0.238	3523	0.91	0.762	14522	0.944
PTGER1	-4.31	8	-1.08	0.139	1821	0.939	0.861	16224	0.957	-2.1	8	-0.55	0.291	4746	0.91	0.709	13299	0.944
LHFPL2	-4.31	8	-1.08	0.139	1822	0.939	0.861	16223	0.957	0.44	8	0.26	0.602	11882	0.91	0.398	6163	0.944
USP2	-4.31	8	-1.08	0.139	1823	0.939	0.861	16222	0.957	1.89	8	0.72	0.763	14911	0.923	0.237	3134	0.944
CAPNS2	-4.31	8	-1.08	0.14	1824	0.939	0.86	16221	0.957	3.59	8	1.26	0.896	16796	0.962	0.104	1249	0.944
ROCK2	-4.3	8	-1.08	0.14	1825	0.939	0.86	16220	0.957	0.98	8	0.43	0.665	13175	0.91	0.335	4870	0.944
BHLHE41	-4.3	8	-1.08	0.14	1826	0.939	0.86	16219	0.957	-1.74	8	-0.44	0.332	5636	0.91	0.668	12409	0.944
TMX1	-4.3	8	-1.08	0.14	1827	0.939	0.86	16218	0.957	-3.77	8	-1.08	0.14	1712	0.91	0.86	16333	0.95
NUP35	-4.3	8	-1.08	0.14	1828	0.939	0.86	16217	0.957	-0.63	8	-0.08	0.467	8796	0.91	0.533	9249	0.944
GLE1	-4.3	8	-1.08	0.14	1829	0.939	0.86	16216	0.957	3.3	8	1.17	0.878	16591	0.955	0.122	1454	0.944
TP53BP2	-4.3	8	-1.08	0.14	1830	0.939	0.86	16215	0.957	-2.12	8	-0.56	0.289	4684	0.91	0.711	13361	0.944
KNCN	-4.3	8	-1.08	0.14	1831	0.939	0.86	16214	0.957	-5.4	8	-1.6	0.0553	511	0.91	0.945	17534	0.972
SPIRE2	-4.3	8	-1.08	0.14	1832	0.939	0.86	16213	0.957	-2.09	8	-0.55	0.292	4780	0.91	0.708	13265	0.944
CAMK2N1	-4.3	8	-1.08	0.14	1833	0.939	0.86	16212	0.957	-1.72	8	-0.43	0.334	5692	0.91	0.666	12353	0.944
SPPL2A	-4.3	8	-1.08	0.14	1834	0.939	0.86	16211	0.957	-4.99	8	-1.47	0.0713	685	0.91	0.929	17360	0.965
SPOCD1	-4.3	8	-1.08	0.14	1835	0.939	0.86	16210	0.957	0.74	8	0.35	0.638	12633	0.91	0.362	5412	0.944
TSPEAR-AS2	-4.29	8	-1.08	0.14	1836	0.939	0.86	16209	0.957	-0.93	8	-0.18	0.43	7898	0.91	0.57	10147	0.944
ARL4C	-4.29	8	-1.08	0.141	1837	0.939	0.859	16208	0.957	-7.97	8	-2.41	0.00795	73	0.91	0.992	17972	0.996
GNPAT	-4.29	8	-1.08	0.141	1838	0.939	0.859	16207	0.957	-4.34	8	-1.26	0.104	1132	0.91	0.896	16913	0.956
CACNA2D4	-4.29	8	-1.08	0.141	1839	0.939	0.859	16206	0.957	-2.81	8	-0.77	0.219	3159	0.91	0.781	14886	0.944
SPTBN1	-4.29	8	-1.08	0.141	1840	0.939	0.859	16205	0.957	-0.46	8	-0.03	0.489	9318	0.91	0.511	8727	0.944
ELF5	-4.29	8	-1.08	0.141	1841	0.939	0.859	16204	0.957	1.2	8	0.5	0.691	13671	0.912	0.309	4374	0.944
PRPSAP1	-4.29	8	-1.08	0.141	1842	0.939	0.859	16203	0.957	-4.74	8	-1.39	0.083	834	0.91	0.917	17211	0.961
CD276	-4.29	8	-1.08	0.141	1843	0.939	0.859	16202	0.957	-2.72	8	-0.75	0.228	3321	0.91	0.772	14724	0.944
PLEKHB1	-4.29	8	-1.08	0.141	1844	0.939	0.859	16201	0.957	0.9	8	0.4	0.656	13004	0.91	0.344	5041	0.944
JUP	-4.28	8	-1.08	0.141	1845	0.939	0.859	16200	0.957	-4.85	8	-1.42	0.0779	769	0.91	0.922	17276	0.963
MRPL48	-4.28	8	-1.08	0.141	1846	0.939	0.859	16199	0.957	-1.42	8	-0.33	0.369	6486	0.91	0.631	11559	0.944
NTPCR	-4.28	8	-1.08	0.141	1847	0.939	0.859	16198	0.957	0.1	8	0.15	0.559	10929	0.91	0.441	7116	0.944
KLHDC1	-4.28	8	-1.07	0.141	1848	0.939	0.859	16197	0.957	-0.38	8	0	0.498	9508	0.91	0.502	8537	0.944
COL12A1	-4.28	8	-1.07	0.141	1849	0.939	0.859	16196	0.957	-3.6	8	-1.02	0.153	1940	0.91	0.847	16105	0.949
TMEM8A	-4.27	8	-1.07	0.142	1850	0.939	0.858	16195	0.956	1.65	8	0.64	0.739	14482	0.92	0.261	3563	0.944
RPP25L	-3.7	6	-1.07	0.142	1851	0.939	0.858	16194	0.956	-0.78	5	-0.19	0.423	7728	0.91	0.577	10317	0.944
ZBED5	-4.27	8	-1.07	0.142	1852	0.939	0.858	16193	0.956	-1.06	8	-0.22	0.414	7528	0.91	0.586	10517	0.944
BBS7	-4.27	8	-1.07	0.142	1853	0.939	0.858	16192	0.956	-1	8	-0.2	0.42	7671	0.91	0.58	10374	0.944
NUP153	-4.27	8	-1.07	0.142	1854	0.939	0.858	16191	0.956	-4.36	8	-1.27	0.103	1112	0.91	0.897	16933	0.956
GPAT2	-4.27	8	-1.07	0.142	1855	0.939	0.858	16190	0.956	-2.1	8	-0.55	0.291	4742	0.91	0.709	13303	0.944
MRPL55	-4.27	8	-1.07	0.142	1856	0.939	0.858	16189	0.956	-0.16	8	0.07	0.527	10195	0.91	0.473	7850	0.944
CIR1	-4.27	8	-1.07	0.142	1857	0.939	0.858	16188	0.956	-5.55	8	-1.64	0.0502	456	0.91	0.95	17589	0.974
SMUG1	-4.27	8	-1.07	0.142	1858	0.939	0.858	16187	0.956	-3.41	8	-0.96	0.167	2162	0.91	0.833	15883	0.946
SCRT2	-4.27	8	-1.07	0.142	1859	0.939	0.858	16186	0.956	-3.39	8	-0.96	0.169	2197	0.91	0.831	15848	0.945
PRPS1	-4.27	8	-1.07	0.142	1860	0.939	0.858	16185	0.956	2.17	8	0.81	0.79	15371	0.927	0.21	2674	0.944
SACM1L	-4.27	8	-1.07	0.142	1861	0.939	0.858	16184	0.956	-3.52	8	-1	0.159	2022	0.91	0.841	16023	0.947
CAMK2G	-4.27	8	-1.07	0.142	1862	0.939	0.858	16183	0.956	-0.29	8	0.03	0.511	9791	0.91	0.489	8254	0.944
RBM38	-4.26	8	-1.07	0.142	1863	0.939	0.858	16182	0.956	-4.62	8	-1.35	0.0892	921	0.91	0.911	17124	0.96
RIDA	-4.26	8	-1.07	0.142	1864	0.939	0.858	16181	0.956	-5.58	8	-1.65	0.0492	447	0.91	0.951	17598	0.975
RAB43	-4.26	8	-1.07	0.142	1865	0.939	0.858	16180	0.956	-4.05	8	-1.17	0.122	1394	0.91	0.878	16651	0.952
USP15	-3.99	7	-1.07	0.142	1866	0.939	0.858	16179	0.956	1.36	8	0.55	0.708	13958	0.915	0.292	4087	0.944
KLHL5	-4.26	8	-1.07	0.142	1867	0.939	0.858	16178	0.956	-3.21	8	-0.9	0.184	2457	0.91	0.816	15588	0.945
GH2	-4.26	8	-1.07	0.142	1868	0.939	0.858	16177	0.956	-1.19	8	-0.26	0.398	7158	0.91	0.602	10887	0.944
AHSA2P	-4.26	8	-1.07	0.142	1869	0.939	0.858	16176	0.956	-1.04	8	-0.21	0.415	7568	0.91	0.585	10477	0.944
CCDC57	-4.26	8	-1.07	0.142	1870	0.939	0.858	16175	0.956	-2.95	8	-0.82	0.207	2914	0.91	0.793	15131	0.944
HMX1	-4.26	8	-1.07	0.143	1871	0.939	0.857	16174	0.956	-3.87	8	-1.11	0.134	1601	0.91	0.866	16444	0.951
AZU1	-4.26	8	-1.07	0.143	1872	0.939	0.857	16173	0.956	-1.55	8	-0.37	0.354	6132	0.91	0.646	11913	0.944
TINF2	-4.26	8	-1.07	0.143	1873	0.939	0.857	16172	0.956	-1.88	8	-0.48	0.316	5268	0.91	0.684	12777	0.944
TRDN	-4.26	8	-1.07	0.143	1874	0.939	0.857	16171	0.956	-2.43	8	-0.65	0.256	3944	0.91	0.744	14101	0.944
PABPC3	-4.26	8	-1.07	0.143	1875	0.939	0.857	16170	0.956	0.12	8	0.16	0.562	11012	0.91	0.438	7033	0.944
SMARCA4	-4.26	8	-1.07	0.143	1876	0.939	0.857	16169	0.956	-0.62	8	-0.08	0.469	8845	0.91	0.531	9200	0.944
TRAF2	-4.26	8	-1.07	0.143	1877	0.939	0.857	16168	0.956	2.36	8	0.87	0.807	15614	0.932	0.193	2431	0.944
ALKBH2	-4.25	8	-1.07	0.143	1878	0.939	0.857	16167	0.956	-2.62	8	-0.71	0.237	3518	0.91	0.763	14527	0.944
RIPOR3	-4.25	8	-1.07	0.143	1879	0.939	0.857	16166	0.956	-2.13	8	-0.56	0.289	4682	0.91	0.711	13363	0.944
NOTCH3	-4.25	8	-1.07	0.143	1880	0.939	0.857	16165	0.956	-2.89	8	-0.8	0.212	3018	0.91	0.788	15027	0.944
SLC25A25	-4.25	8	-1.07	0.143	1881	0.939	0.857	16164	0.956	-2.29	8	-0.61	0.271	4251	0.91	0.729	13794	0.944
COA1	-4.25	8	-1.07	0.143	1882	0.939	0.857	16163	0.956	1.64	8	0.64	0.739	14481	0.92	0.261	3564	0.944
SHOC1	-4.25	8	-1.07	0.143	1883	0.939	0.857	16162	0.956	-3.55	8	-1.01	0.157	1989	0.91	0.843	16056	0.948
EPB41L2	-4.25	8	-1.07	0.143	1884	0.939	0.857	16161	0.956	-2.42	8	-0.65	0.257	3963	0.91	0.743	14082	0.944
ATF2	-4.25	8	-1.07	0.143	1885	0.939	0.857	16160	0.956	-5.07	8	-1.49	0.0681	649	0.91	0.932	17396	0.966
CELF6	-4.25	8	-1.07	0.143	1886	0.939	0.857	16159	0.956	-3.58	8	-1.02	0.154	1957	0.91	0.846	16088	0.948
KCNE4	-3.68	6	-1.07	0.143	1887	0.939	0.857	16158	0.956	2.74	6	1.12	0.868	16478	0.951	0.132	1567	0.944
THG1L	-3.97	7	-1.07	0.143	1888	0.939	0.857	16157	0.956	-2.38	7	-0.69	0.245	3686	0.91	0.755	14359	0.944
TUBGCP2	-3.67	6	-1.07	0.143	1889	0.939	0.857	16156	0.956	-10.29	6	-3.65	0.000131	13	0.182	1	18032	1
VPS25	-4.24	8	-1.07	0.143	1890	0.939	0.857	16155	0.956	-2.79	8	-0.77	0.222	3211	0.91	0.778	14834	0.944
VSX2	-4.24	8	-1.06	0.143	1891	0.939	0.857	16154	0.956	-4	8	-1.15	0.125	1441	0.91	0.875	16604	0.951
ITGB5	-3.67	6	-1.06	0.144	1892	0.939	0.856	16153	0.956	-4.24	6	-1.43	0.0759	745	0.91	0.924	17300	0.964
MPZL1	-4.24	8	-1.06	0.144	1893	0.939	0.856	16152	0.956	-1.72	8	-0.43	0.334	5693	0.91	0.666	12352	0.944
KDM1B	-4.24	8	-1.06	0.144	1894	0.939	0.856	16151	0.956	-2.72	8	-0.74	0.228	3328	0.91	0.772	14717	0.944
INHBB	-4.24	8	-1.06	0.144	1895	0.939	0.856	16150	0.956	-2.61	8	-0.71	0.239	3552	0.91	0.761	14493	0.944
KCNC1	-4.23	8	-1.06	0.144	1896	0.939	0.856	16149	0.956	-4.64	8	-1.36	0.0877	894	0.91	0.912	17151	0.96
KIF2B	-4.23	8	-1.06	0.144	1897	0.939	0.856	16148	0.956	-5.49	8	-1.62	0.0523	483	0.91	0.948	17562	0.974
SYNE3	-4.23	8	-1.06	0.144	1898	0.939	0.856	16147	0.956	2.98	8	1.06	0.856	16324	0.946	0.144	1721	0.944
TMEM256	-4.23	8	-1.06	0.144	1899	0.939	0.856	16146	0.956	-3.63	8	-1.03	0.151	1895	0.91	0.849	16150	0.949
PTPRK	-4.23	8	-1.06	0.144	1900	0.939	0.856	16145	0.956	-2.41	8	-0.65	0.259	4008	0.91	0.741	14037	0.944
CCN4	-4.22	8	-1.06	0.145	1901	0.939	0.855	16144	0.956	-4.78	8	-1.4	0.0809	804	0.91	0.919	17241	0.962
ZNF782	-4.22	8	-1.06	0.145	1902	0.939	0.855	16143	0.956	-2.57	8	-0.7	0.243	3627	0.91	0.757	14418	0.944
KRTAP5-1	-4.22	8	-1.06	0.145	1903	0.939	0.855	16142	0.956	-1.98	8	-0.51	0.305	5024	0.91	0.695	13021	0.944
A4GALT	-4.22	8	-1.06	0.145	1904	0.939	0.855	16141	0.956	-4.06	8	-1.17	0.121	1385	0.91	0.879	16660	0.952
DDX58	-4.22	8	-1.06	0.145	1905	0.939	0.855	16140	0.956	-1.87	8	-0.48	0.317	5293	0.91	0.683	12752	0.944
IFNGR2	-4.22	8	-1.06	0.145	1906	0.939	0.855	16139	0.956	-0.12	8	0.08	0.532	10339	0.91	0.468	7706	0.944
NR4A1	-4.22	8	-1.06	0.145	1907	0.939	0.855	16138	0.956	-6.01	8	-1.79	0.0369	313	0.91	0.963	17732	0.98
CNTN3	-4.22	8	-1.06	0.145	1908	0.939	0.855	16137	0.956	-3.2	8	-0.9	0.185	2472	0.91	0.815	15573	0.945
SLFN14	-4.22	8	-1.06	0.145	1909	0.939	0.855	16136	0.956	-1.76	8	-0.44	0.33	5590	0.91	0.67	12455	0.944
MACROH2A2	-4.22	8	-1.06	0.145	1910	0.939	0.855	16135	0.956	-3.7	8	-1.06	0.145	1804	0.91	0.855	16241	0.949
PPIL4	-4.22	8	-1.06	0.145	1911	0.939	0.855	16134	0.956	1.18	8	0.49	0.689	13636	0.911	0.311	4409	0.944
LRRC30	-4.21	8	-1.06	0.145	1912	0.939	0.855	16133	0.956	-3.38	8	-0.95	0.17	2206	0.91	0.83	15839	0.945
NDUFAF7	-4.21	8	-1.06	0.145	1913	0.939	0.855	16132	0.956	-1.95	8	-0.5	0.308	5100	0.91	0.692	12945	0.944
CPNE7	-4.21	8	-1.06	0.145	1914	0.939	0.855	16131	0.956	-3.78	8	-1.08	0.14	1697	0.91	0.86	16348	0.95
OR4D6	-4.21	8	-1.06	0.145	1915	0.939	0.855	16130	0.956	-6.1	8	-1.82	0.0345	295	0.91	0.965	17750	0.981
SNX13	-4.21	8	-1.06	0.146	1916	0.939	0.854	16129	0.956	0.6	8	0.31	0.621	12301	0.91	0.379	5744	0.944
ABHD1	-4.21	8	-1.06	0.146	1917	0.939	0.854	16128	0.956	-0.71	8	-0.11	0.457	8552	0.91	0.543	9493	0.944
DNAJB14	-4.21	8	-1.06	0.146	1918	0.939	0.854	16127	0.956	-5.65	8	-1.67	0.047	423	0.91	0.953	17622	0.976
CREG1	-4.2	8	-1.05	0.146	1919	0.939	0.854	16126	0.956	-4.31	8	-1.25	0.106	1157	0.91	0.894	16888	0.955
GLG1	-4.2	8	-1.05	0.146	1920	0.939	0.854	16125	0.956	-0.02	8	0.11	0.544	10607	0.91	0.456	7438	0.944
DUSP10	-4.2	8	-1.05	0.146	1921	0.939	0.854	16124	0.956	-2.54	8	-0.69	0.246	3699	0.91	0.754	14346	0.944
MTMR1	-4.2	8	-1.05	0.146	1922	0.939	0.854	16123	0.956	-2.41	8	-0.65	0.259	3992	0.91	0.741	14053	0.944
CUL9	-4.2	8	-1.05	0.146	1923	0.939	0.854	16122	0.956	2.87	8	1.03	0.848	16212	0.944	0.152	1833	0.944
DCBLD1	-4.2	8	-1.05	0.146	1924	0.939	0.854	16121	0.956	-2.2	8	-0.58	0.281	4514	0.91	0.719	13531	0.944
ZNF174	-4.2	8	-1.05	0.146	1925	0.939	0.854	16120	0.956	-3.99	8	-1.15	0.126	1461	0.91	0.874	16584	0.951
RAB36	-4.2	8	-1.05	0.146	1926	0.939	0.854	16119	0.956	-4.12	8	-1.19	0.118	1330	0.91	0.882	16715	0.952
ACO2	-4.2	8	-1.05	0.146	1927	0.939	0.854	16118	0.956	2.86	8	1.03	0.847	16207	0.943	0.153	1838	0.944
ATF7	-4.19	8	-1.05	0.146	1928	0.939	0.854	16117	0.956	-0.65	8	-0.09	0.465	8754	0.91	0.535	9291	0.944
TFAM	-4.19	8	-1.05	0.147	1929	0.939	0.853	16116	0.955	3.65	8	1.27	0.899	16829	0.963	0.101	1216	0.944
PPIP5K2	-4.19	8	-1.05	0.147	1930	0.939	0.853	16115	0.955	-1.41	8	-0.33	0.37	6505	0.91	0.63	11540	0.944
PACS1	-4.19	8	-1.05	0.147	1931	0.939	0.853	16114	0.955	-3.56	8	-1.01	0.156	1984	0.91	0.844	16061	0.948
ZNF543	-4.19	8	-1.05	0.147	1932	0.939	0.853	16113	0.955	-0.76	8	-0.12	0.451	8422	0.91	0.549	9623	0.944
CFAP53	-4.19	8	-1.05	0.147	1933	0.939	0.853	16112	0.955	1.02	8	0.44	0.67	13278	0.91	0.33	4767	0.944
WDR3	-4.18	8	-1.05	0.147	1934	0.939	0.853	16111	0.955	-5.39	8	-1.59	0.0556	518	0.91	0.944	17527	0.972
PHAX	-4.18	8	-1.05	0.147	1935	0.939	0.853	16110	0.955	-2.27	8	-0.6	0.274	4323	0.91	0.726	13722	0.944
BNIPL	-4.18	8	-1.05	0.147	1936	0.939	0.853	16109	0.955	-4.44	8	-1.29	0.0984	1057	0.91	0.902	16988	0.957
CABLES2	-4.18	8	-1.05	0.147	1937	0.939	0.853	16108	0.955	1.9	8	0.72	0.764	14931	0.923	0.236	3114	0.944
SLC35A1	-4.18	8	-1.05	0.147	1938	0.939	0.853	16107	0.955	1.37	8	0.55	0.709	13983	0.915	0.291	4062	0.944
ADAM8	-4.18	8	-1.05	0.147	1939	0.939	0.853	16106	0.955	-1.21	8	-0.27	0.395	7096	0.91	0.605	10949	0.944
GMFG	-4.18	8	-1.05	0.147	1940	0.939	0.853	16105	0.955	-1.67	8	-0.41	0.34	5826	0.91	0.66	12219	0.944
FAM193A	-4.18	8	-1.05	0.147	1941	0.939	0.853	16104	0.955	1.71	8	0.66	0.745	14597	0.921	0.255	3448	0.944
CLDN4	-4.17	8	-1.05	0.148	1942	0.939	0.852	16103	0.955	-5.29	8	-1.56	0.0594	557	0.91	0.941	17488	0.97
STAG2	-4.17	8	-1.05	0.148	1943	0.939	0.852	16102	0.955	-3.73	8	-1.07	0.143	1771	0.91	0.857	16274	0.95
C2CD6	-4.17	8	-1.05	0.148	1944	0.939	0.852	16101	0.955	-1.98	8	-0.51	0.304	5021	0.91	0.696	13024	0.944
RGS14	-4.17	8	-1.05	0.148	1945	0.939	0.852	16100	0.955	-5.05	8	-1.48	0.0689	662	0.91	0.931	17383	0.966
RASL11A	-4.17	8	-1.04	0.148	1946	0.939	0.852	16099	0.955	0.01	8	0.12	0.548	10703	0.91	0.452	7342	0.944
ZNF655	-4.17	8	-1.04	0.148	1947	0.939	0.852	16098	0.955	-0.65	8	-0.09	0.465	8744	0.91	0.535	9301	0.944
ABCG2	-4.17	8	-1.04	0.148	1948	0.939	0.852	16097	0.955	-0.4	8	-0.01	0.497	9482	0.91	0.503	8563	0.944
MST1	-4.17	8	-1.04	0.148	1949	0.939	0.852	16096	0.955	-0.46	8	-0.03	0.489	9328	0.91	0.511	8717	0.944
ARHGDIA	-4.16	8	-1.04	0.148	1950	0.939	0.852	16095	0.955	-3.47	8	-0.98	0.163	2088	0.91	0.837	15957	0.947
PTPRZ1	-4.16	8	-1.04	0.148	1951	0.939	0.852	16094	0.955	-2.32	8	-0.62	0.269	4197	0.91	0.731	13848	0.944
PRC1	-3.89	7	-1.04	0.148	1952	0.939	0.852	16093	0.955	-0.53	7	-0.06	0.475	8988	0.91	0.525	9057	0.944
KCTD17	-4.16	8	-1.04	0.148	1953	0.939	0.852	16092	0.955	-1.37	8	-0.32	0.375	6621	0.91	0.625	11424	0.944
GPAT4	-4.16	8	-1.04	0.148	1954	0.939	0.852	16091	0.955	-3.14	8	-0.88	0.19	2573	0.91	0.81	15472	0.944
RBM15B	-4.16	8	-1.04	0.148	1955	0.939	0.852	16090	0.955	2.28	8	0.84	0.8	15512	0.93	0.2	2533	0.944
PILRA	-4.16	8	-1.04	0.148	1956	0.939	0.852	16089	0.955	-4.44	8	-1.29	0.0983	1054	0.91	0.902	16991	0.957
LBP	-4.16	8	-1.04	0.148	1957	0.939	0.852	16088	0.955	-1.86	8	-0.47	0.319	5329	0.91	0.681	12716	0.944
DVL2	-4.16	8	-1.04	0.149	1958	0.939	0.851	16087	0.955	-2.62	8	-0.71	0.238	3537	0.91	0.762	14508	0.944
CSNK1A1L	-4.16	8	-1.04	0.149	1959	0.939	0.851	16086	0.955	-3.79	8	-1.08	0.139	1695	0.91	0.861	16350	0.95
F2RL3	-4.16	8	-1.04	0.149	1960	0.939	0.851	16085	0.955	-1.47	8	-0.35	0.364	6351	0.91	0.636	11694	0.944
PMM2	-4.16	8	-1.04	0.149	1961	0.939	0.851	16084	0.955	-1.31	8	-0.3	0.383	6798	0.91	0.617	11247	0.944
STAMBP	-4.16	8	-1.04	0.149	1962	0.939	0.851	16083	0.955	-3.34	8	-0.94	0.173	2258	0.91	0.827	15787	0.945
ZNF550	-4.16	8	-1.04	0.149	1963	0.939	0.851	16082	0.955	-0.93	8	-0.18	0.429	7881	0.91	0.571	10164	0.944
LRRC73	-4.15	8	-1.04	0.149	1964	0.939	0.851	16081	0.955	-1.5	8	-0.36	0.36	6269	0.91	0.64	11776	0.944
HDAC4	-4.15	8	-1.04	0.149	1965	0.939	0.851	16080	0.955	-3.2	8	-0.9	0.185	2482	0.91	0.815	15563	0.945
PDE1C	-4.15	8	-1.04	0.149	1966	0.939	0.851	16079	0.955	-1.48	8	-0.35	0.362	6321	0.91	0.638	11724	0.944
LYSMD3	-4.15	8	-1.04	0.149	1967	0.939	0.851	16078	0.955	0.85	8	0.39	0.651	12898	0.91	0.349	5147	0.944
FLG	-4.15	8	-1.04	0.149	1968	0.939	0.851	16077	0.955	-1.14	8	-0.24	0.403	7291	0.91	0.597	10754	0.944
AKAP8	-4.15	8	-1.04	0.149	1969	0.939	0.851	16076	0.955	-1.25	8	-0.28	0.39	6969	0.91	0.61	11076	0.944
TSPAN17	-4.15	8	-1.04	0.149	1970	0.939	0.851	16075	0.955	-1.55	8	-0.37	0.354	6131	0.91	0.646	11914	0.944
RRAGD	-4.15	8	-1.04	0.149	1971	0.939	0.851	16074	0.955	-2.08	8	-0.54	0.294	4822	0.91	0.706	13223	0.944
SOX1	-4.15	8	-1.04	0.149	1972	0.939	0.851	16073	0.955	-3.81	8	-1.09	0.138	1672	0.91	0.862	16373	0.95
KLRG2	-4.15	8	-1.04	0.149	1973	0.939	0.851	16072	0.955	-3.46	8	-0.98	0.164	2101	0.91	0.836	15944	0.947
FKBP9	-4.15	8	-1.04	0.149	1974	0.939	0.851	16071	0.955	-8.42	8	-2.55	0.00537	57	0.91	0.995	17988	0.998
SARS2	-4.14	8	-1.04	0.149	1975	0.939	0.851	16070	0.955	-3.33	8	-0.94	0.174	2271	0.91	0.826	15774	0.945
PNRC2	-4.14	8	-1.04	0.149	1976	0.939	0.851	16069	0.955	-2.85	8	-0.79	0.216	3103	0.91	0.784	14942	0.944
TLE6	-4.14	8	-1.04	0.15	1977	0.939	0.85	16068	0.955	-3.14	8	-0.88	0.19	2581	0.91	0.81	15464	0.944
ZBTB37	-4.14	8	-1.04	0.15	1978	0.939	0.85	16067	0.955	-0.26	8	0.03	0.514	9869	0.91	0.486	8176	0.944
DNA2	-4.14	8	-1.04	0.15	1979	0.939	0.85	16066	0.955	-1.7	8	-0.42	0.337	5752	0.91	0.663	12293	0.944
RAB9A	-4.14	8	-1.04	0.15	1980	0.939	0.85	16065	0.955	-0.2	8	0.05	0.521	10068	0.91	0.479	7977	0.944
CLN8	-4.14	8	-1.04	0.15	1981	0.939	0.85	16064	0.955	-2.25	8	-0.6	0.276	4368	0.91	0.724	13677	0.944
CALML5	-4.14	8	-1.04	0.15	1982	0.939	0.85	16063	0.955	-1.71	8	-0.42	0.336	5735	0.91	0.664	12310	0.944
TAF3	-4.14	8	-1.04	0.15	1983	0.939	0.85	16062	0.955	-1.58	8	-0.38	0.351	6065	0.91	0.649	11980	0.944
TWISTNB	-4.13	8	-1.04	0.15	1984	0.939	0.85	16061	0.955	-1.28	8	-0.29	0.386	6882	0.91	0.614	11163	0.944
SOX12	-4.13	8	-1.04	0.15	1985	0.939	0.85	16060	0.955	-4.7	8	-1.37	0.0849	864	0.91	0.915	17181	0.961
PRR29	-4.13	8	-1.04	0.15	1986	0.939	0.85	16059	0.955	2.07	8	0.77	0.78	15217	0.925	0.22	2828	0.944
TPST2	-4.13	8	-1.04	0.15	1987	0.939	0.85	16058	0.955	-1.71	8	-0.42	0.336	5730	0.91	0.664	12315	0.944
PRSS56	-4.13	8	-1.04	0.15	1988	0.939	0.85	16057	0.955	-2.87	8	-0.79	0.214	3068	0.91	0.786	14977	0.944
NRN1	-4.13	8	-1.03	0.15	1989	0.939	0.85	16056	0.955	-2.22	8	-0.59	0.279	4459	0.91	0.721	13586	0.944
CYTH4	-4.13	8	-1.03	0.15	1990	0.939	0.85	16055	0.955	-6.47	8	-1.93	0.0265	227	0.91	0.973	17818	0.986
S100A7L2	-4.13	8	-1.03	0.15	1991	0.939	0.85	16054	0.955	-2.69	8	-0.74	0.231	3380	0.91	0.769	14665	0.944
PTCD2	-4.13	8	-1.03	0.151	1992	0.939	0.849	16053	0.955	0.81	8	0.38	0.646	12798	0.91	0.354	5247	0.944
NFKBIB	-4.13	8	-1.03	0.151	1993	0.939	0.849	16052	0.955	-3.92	8	-1.12	0.131	1551	0.91	0.869	16494	0.951
PLPP1	-4.13	8	-1.03	0.151	1994	0.939	0.849	16051	0.955	-1.09	8	-0.23	0.41	7429	0.91	0.59	10616	0.944
CCDC88A	-4.13	8	-1.03	0.151	1995	0.939	0.849	16050	0.955	-1.75	8	-0.44	0.331	5612	0.91	0.669	12433	0.944
TMEM267	-4.12	8	-1.03	0.151	1996	0.939	0.849	16049	0.955	-2.39	8	-0.64	0.261	4044	0.91	0.739	14001	0.944
CENPT	-4.12	8	-1.03	0.151	1997	0.939	0.849	16048	0.955	5.02	8	1.71	0.956	17366	0.994	0.0437	679	0.944
TUBB3	-4.12	8	-1.03	0.151	1998	0.939	0.849	16047	0.955	-8.99	8	-2.73	0.00315	43	0.91	0.997	18002	0.999
RAP1GAP2	-4.12	8	-1.03	0.151	1999	0.939	0.849	16046	0.955	-3.71	8	-1.06	0.145	1796	0.91	0.855	16249	0.95
[truncated: 16,046 more rows]
