# Supplementary material for: The PLK4 inhibitor RP-1664 demonstrates potent efficacy in neuroblastoma preclinical models through a dual mechanism of sensitivity
Source: Nat Commun. 2026 Jun 13;17:7531. doi: 10.1038/s41467-026-74061-5 (PMC13408883; doi:10.1038/s41467-026-74061-5)
Supplement: Supplementary file 5 — S Data3 [file 41467_2026_74061_MOESM5_ESM.xlsx]

## Sheet: RP1664_BE_LFC_data
sgRNA		target_mutation	RP-1664.50nM_vs_DMSO_log2FoldChange	RP-1664.50nM_vs_DMSO_pvalue	RP-1664.150nM_vs_DMSO_log2FoldChange	RP0-1664.150nM_vs_DMSO_pvalue
TP53_82	GTTACACATGTAGTTGTAG	TP53 p.M237I	2.073521036823979	5.131997980839895e-183	3.2710788973757325	0
TP53_22	GAGTACTGTAGGAAGAGGA	TP53 p.X126_splice	1.9810630314474216	0	3.232508464933679	0
TP53_294	CTTCCCAGAAAACCTACCA	TP53 p.Q100*	1.991562433180178	0	3.228494255074203	0
TP53_211	TTCCAGTGTGATGATGGTG	TP53 p.E258K	2.09817	2.0498480706120955e-175	3.223426386050146	0
TP53_307	CCACTCGGATAAGATGCTG	TP53 p.V197M	2.013528482153427	0	3.192455671058792	0
TP53_52	GACCTAAGAGCAATCAGTG	TP53 p.X187_splice	1.9547389378560664	7.20860783097742e-215	3.143537277425591	0
TP53_7	CCTCAGCATCTTATCCGAG	TP53 p.Q192*	1.8195180938583884	1.1142198833362028e-246	3.1170214839707526	0
TP53_124	ACCCACAGCTGCACAGGGC	TP53 p.W146*	1.717981651926508	1.2445336463219437e-275	3.0029917809782036	0
TP53_212	GAGTCTTCCAGTGTGATGA	TP53 p.E258K	1.2645053084467548	4.3702137927944633e-51	2.750456000812416	2.0364054640280813e-237
TP53_182	CGCCGGTCTCTCCCAGGAC	TP53 p.D281N	1.557729308973766	2.527552281963552e-253	2.7378441310400348	0
TP53_293	CCTTCCCAGAAAACCTACC	TP53 p.Q100*	1.5049130154448669	1.7882720459292907e-124	2.677402571850168	0
TP53_158	CCCTTCAGGTACTAAGTCT	TP53 p.Q331*	1.4977026080208429	1.0454337981882937e-108	2.5618292682293013	0
TP53_30	AACACTTTTCGACATAGTG	TP53 p.R213*	1.2350096536543622	9.690808872930223e-7	2.3183403803603295	3.567711728285796e-20
TP53_84	CACATGTAGTTGTAGTGGA	TP53 p.M237I	1.332991331607977	7.314561141989705e-58	2.3005318185773542	1.7316900418638407e-170
TP53_21	GGAGTACTGTAGGAAGAGG	TP53 p.X126_splice	1.3663421290949238	4.294393148880246e-40	2.1608325828784176	9.379413120377245e-99
TP53_206	ATTCTCTTCCTCTGTGCGC	TP53 p.E286K	0.9801673103633648	1.2220668711519461e-51	2.019008101080503	3.7742199323994943e-215
TP53_96	ATGTTCCGAGAGCTGAATG	TP53 p.R342*	1.0811800795227555	2.4571725913973435e-35	1.983609808243854	6.894383962124458e-116
TP53_147	TTGGCAAAACATCTTGTTG	TP53 p.C135Y	0.975662	1.0170687889256589e-24	1.9580702435489543	1.657911472639475e-95
TP53_222	CAGTCACAGCACATGACGG	TP53 p.Q167*	0.6031319905556595	1.585458623495187e-9	1.7707551449479808	7.818356931969434e-71
TP53_138	ATGGCCATGGCGCGGACGC	TP53 p.A161T	0.7326530887326274	2.7259964446967255e-43	1.760347258647435	1.2919141262442814e-243
TP53_46	GGGAGAGACCGGCGCACAG	TP53 p.R282W	0.7397346429392563	1.476484259515017e-31	1.7086879701984747	4.819792088113707e-163
TP53_127	ATCAACCCACAGCTGCACA	TP53 p.W146*	0.8459249144759258	6.769259735201396e-25	1.6737057939350883	5.7628954066657404e-93
TP53_26	AGGGGAGTACTGTAGGAAG	TP53 p.X126_splice	0.7354636324784697	6.13223822391213e-11	1.593222567036656	2.8488735728495046e-46
TP53_68	TGCACGGTCAGTTGCCCTG	TP53 p.T125M	0.6704412888251415	3.154413696327098e-21	1.4587202596637954	5.8381035321158786e-95
TP53_24	GTACTGTAGGAAGAGGAAG	TP53 p.X126_splice	0.8321192850379638	6.478746658996654e-6	1.416359161862533	1.2644250292969724e-14
PRDM14_5	TTAGGCTGGAAGATTGAGA	PRDM14 p.S475N	0.34855008827213574	0.00369976	1.301223091699045	1.2707961839469714e-27
TP53_168	CTTCCTGAAAACAACGTTC	TP53 p.P27S	0.14571999054454568	0.11729443429916256	1.108532077090342	2.201905938302387e-33
CASP8_1	CTCTTCCGAATTAATAGAC	CASP8 p.R127*	0.6115443644864504	0.0370373	1.091364528637031	1.8818957885915992e-4
ETV6_8	TTCATATACACCTCCAGAG	ETV6 p.S16L	0.3866041940834318	0.0266867	1.0428793027953287	1.809998955613289e-9
XIAP_1	ACTTCGAATATTAAGATTC	XIAP p.R238Q	0.3382008723901454	0.22803751891355453	1.0202945359103444	2.6558810797080437e-4
SF3B1_16	TCTGTTCTTGGAAAGCATA	SF3B1 p.E902K	0.5046280391494814	0.24057511745478183	0.9782277991167186	0.0228127
TSC1_6	GAGTTATTTCGTAATAAGA	TSC1 p.R1097C	0.4663672285164559	0.10014918175189448	0.9270644860764792	0.00103802
TP53_72	TGCCTGTCCTGGGAGAGAC	TP53 p.P278L	0.26988675271435936	0.00813873	0.9262534799065054	7.264016992826758e-20
TP53_323	CTGAGCAGCGCTCATGGTG	TP53 p.R181H	0.5778617922536283	2.695431424116343e-9	0.8968788053203682	2.162428284853465e-20
AKT3_1	ATATTCTCCTACATGAGGA	AKT3 p.E17K	0.4575500820529418	0.0220245	0.8836794225326453	9.135410740616098e-6
CDK8_3	TGTCGGCATGTAGAGAAAT	CDK8 p.S62L	0.25539713040993145	0.2867921284494188	0.8798777976662456	2.310393523312576e-4
TP53_305	TTCCACTCGGATAAGATGC	TP53 p.V197M	0.7290085278228903	0.0144216	0.8742854768869366	0.00333847
STK11_7	CTTCTGTCAGCTGATTGAC	STK11 p.Q159*	0.500965	3.949691140685701e-4	0.8464840828769505	1.954838215893676e-9
TP53_296	CCCTTCCCAGAAAACCTAC	TP53 p.Q100*	0.4188531820980983	6.370181903939618e-4	0.8464496589999746	4.216861423048142e-12
TP53_297	TTCCCAGAAAACCTACCAG	TP53 p.Q100*	0.2606407344203459	0.35052273480812457	0.8364781325913119	0.00270935
TP53_210	CTTCCAGTGTGATGATGGT	TP53 p.E258K	0.7151936854216503	4.165021425384803e-7	0.8338019736852567	3.5014153017852e-9
MAP2K4_29	ATCCCTTTATTTTGATGTA	MAP2K4 p.P365S	-0.105667	0.6332287193708654	0.8314184622801224	1.5805195395420082e-4
DICER1_1	GACTCAAAAATATCCCCCA	DICER1 p.E1813K	0.4087366527936254	0.17864636125905253	0.8239965361053732	0.00645206
NF1_67	CTTACCCACTGAGAACAAG	NF1 p.W1236*	0.9154694192415312	6.86298140609931e-20	0.8098580877412621	7.251290221607659e-16
CRLF2_3	GATTTTCGTGGCATCAGGA	CRLF2 p.S128L	0.19774142236950257	0.2695555241736363	0.7937898925583755	8.639268469940558e-6
DIS3_3	GATCGTCTTGCTTGTTTGT	DIS3 p.R210C	0.3009381481720092	0.0690696	0.7826400858378438	2.0150662565520944e-6
STAG2_11	ATTTTTCGAATTATCTCAG	STAG2 p.R146Q	0.41858065043317894	0.0263116	0.782028	3.1108926149711285e-5
APC_12	TTTTAGCGAAGAATAGCCA	APC p.R216*	0.3903996301360088	0.0610762	0.7795802060499635	1.7362508361721315e-4
TP53_87	CTGTTACACATGTAGTTGT	TP53 p.M237I	0.25639507069579703	0.15244731451681748	0.778619	1.2932399516200215e-5
PTPRT_34	TTCACCATCATGAAAGATC	PTPRT p.M76I	0.16428751589620005	0.4485232801654138	0.7662633084174245	3.92786810438794e-4
TP53_78	GTAACAGTTCCTGCATGGG	TP53 p.S241F	0.35276840808992604	0.0101639	0.7624464234781736	2.6077073484057938e-8
NF1_44	GAACTTACCACTAAAATGA	NF1 p.X2143_splice	0.7364302113900956	2.3394836192876314e-6	0.7598029941335706	1.1067765365737256e-6
DDR2_4	GATGCCATGACCTCCTGCA	DDR2 p.G111D	0.47092764471423415	1.059652897917083e-8	0.7515402381445588	5.72560284701475e-20
TP53_159	CCTTCAGGTACTAAGTCTT	TP53 p.Q331*	0.10171053402222605	0.5347799073651236	0.7388985893577864	5.906695062597677e-6
DIS3_10	ATGTTTTCGAAGCAGAGCA	DIS3 p.R689Q	0.4164588794002273	0.0751215	0.7350837899527906	0.00164438
TP53_23	AGTACTGTAGGAAGAGGAA	TP53 p.X126_splice	0.1983001040034898	0.2948955641670222	0.7340120266625686	9.8336121282577e-5
FBXW7_49	CTCGAGATGCCACTCTTAG	FBXW7 p.R479*	0.4863654673266587	7.254259175359901e-5	0.7333059136447786	2.080947892535954e-9
PDGFRB_7	TCTGTTACTCGGCATGGAA	PDGFRB p.R150Q	0.6231282881685895	9.88660093466022e-6	0.7322236912899667	2.019863577165043e-7
PPM1D_2	TAGCTCGAGAGAATGTCCA	PPM1D p.R458*	0.28876835473850987	0.31428399841627447	0.7187055198807825	0.012216
EPHA3_8	TGAACTTGCGGTAGGCTAT	EPHA3 p.R799H	0.3087371580914649	0.37260444008834687	0.7173599320628522	0.0381943
PAK5_22	AAGTCTTCGTACCTGAATC	PAK5 p.S271L	-0.060178	0.629813	0.7146321918919741	8.176554002972873e-9
NSD1_1	GGGGAGATCCGTGAGTATG	NSD1 p.R2219C	0.263959	0.10105639242899368	0.7114449969206618	9.063679069308329e-6
SPEN_17	GATCGTACATATTATGAGA	SPEN p.R630C	-0.0157663	0.9601293955466964	0.7078766456120668	0.0240788
IKZF1_48	GGCCGAAGCTATAAACAGC	IKZF1 p.R208*	0.5737009885553271	2.0015034109137456e-4	0.6972667505057228	6.094894013168686e-6
HIST3H3_1	GATCTCGCGCATCAGCCGC	HIST3H3 p.E74K	0.3117577859652232	0.00518762	0.6933191221157536	4.4854807463068316e-10
TP53_137	GATGGCCATGGCGCGGACG	TP53 p.A161T	0.18656356941107952	6.432845748793475e-4	0.6891020759444978	1.0372146473268607e-36
PDGFRA_12	TGAGAACCGAGAGCTGAAG	PDGFRA p.R512*	0.4240798378002114	0.00209338	0.6878147302896018	5.771537227849916e-7
ATM_37	TTACGATAGTGGTTTCAGA	ATM p.X974_splice	0.439845	0.0164345	0.6820665761871552	1.9121232291638172e-4
PTPRD_18	ATCCAGTTGTTGACATGTT	PTPRD p.W466*	0.11580749912263634	0.5178248824543843	0.674411	1.5632502192802346e-4
APC_4	AACTACACGAATGGACCAT	APC p.R283*	0.39750453978046735	0.0823637	0.6731178955262784	0.00321637
ARID2_27	AACCTCAACAGTCGAATGC	ARID2 p.Q1043*	0.3780129969343685	0.0311062	0.6690806704381072	1.3128943474538808e-4
CDKN2A_140	TCTATGCGGGCATGGTTAC	CDKN2A p.R144H	0.27957297067628645	0.0555009	0.6665893048867979	4.700379329513252e-6
TP53_88	ACACATGTAGTTGTAGTGG	TP53 p.M237I	0.076343	0.6893740897217147	0.6647904439228828	4.713153128383871e-4
TP53_32	TTTCGACATAGTGTGGTGG	TP53 p.R213*	0.35237846435155534	0.032437	0.6596727996501374	5.958572232481399e-5
PIK3CA_65	TCTCCTGTTTGAGAATGTC	PIK3CA p.E722K	0.5044428457378853	0.0122735	0.6571341906681455	0.00109191
RB1_70	TCATTTCAGTTAATGCTAT	RB1 p.Q217*	0.3723285356389934	0.1699455372830115	0.6510519478114302	0.0162334
EGFR_56	GTTTCCTTCAAGATCCTCA	EGFR p.E709K	0.26029499533476136	0.0595914	0.6497689457689836	2.365030258518377e-6
CDK12_5	CTTGCTCGGCTCTATAACT	CDK12 p.R882W	0.31844126162573816	0.0100851	0.6435145665502533	1.900255463825849e-7
RB1_3	CGATACACTGTGGGAATAA	RB1 p.X654_splice	0.38103556522276166	0.0455319	0.6416370166979696	7.481357578628848e-4
LATS1_20	ATCGTAAAAAACAATTAGA	LATS1 p.R660C	0.0584693	0.7593434386503171	0.6247729217289583	9.995235499285682e-4
RB1_45	TTTGCTTACATATCTGCTG	RB1 p.X605_splice	0.11981232241291076	0.33418634252312696	0.619489	5.160695590071348e-7
FOXA1_1	CGGACTCCGGCAACATGTT	FOXA1 p.S250F	0.42448249461743154	0.00123243	0.6190766727231477	2.3923903284477156e-6
RUNX1_4	TATCTGAAGAGAATCAGAA	RUNX1 p.X269_splice	0.0925589	0.7737010683962189	0.6176409156097924	0.0548273
CREBBP_13	GTTTTCCCCACAGACTTTG	CREBBP p.S1207F	0.44355561317739367	0.00641994	0.6105672940456272	1.733211195331367e-4
TP53_271	AGCATCTTATCCGAGTGGA	TP53 p.H193Y	0.15689892702295585	0.2393257366097905	0.6096047307795387	4.419409891141639e-6
PDGFRA_25	GCACATTCGTAATCTCCAC	PDGFRA p.E289K	0.4151781379768371	0.0319589	0.6074399443622954	0.00168476
TP53_256	AAACCTACCAGGGCAGCTA	TP53 p.Q104*	0.2343714208616408	0.0591068	0.5979074461748781	1.4135232179423603e-6
PTPRS_59	CGGATGCGGTATGAAGGCG	PTPRS p.R1901W	0.5917512635767647	6.255989719324935e-9	0.5944353599695678	5.396463021155247e-9
RAD50_4	GCAATTTCGTGATGTCAAT	RAD50 p.R87C	-0.197668	0.36662837349194055	0.5882869314654183	0.00677931
SETD2_5	ACTGAACGAGGAAGGGATG	SETD2 p.R2040*	0.29648244132809803	0.11630573943664677	0.5877352153596399	0.00182787
TP53_285	ATATTGAACAATGGTTCAC	TP53 p.Q52*	0.12907551127035816	0.5038914774424457	0.5835631532893109	0.00240407
CIC_18	ATCTTCTGGCGCACCTCAC	CIC p.R1515H	0.199607	0.0679332	0.5816	9.718990799562692e-8
PTCH1_7	CCCCTCGGGGGTTCCGCCC	PTCH1 p.R1394Q	0.12283084461674336	0.07267	0.5805745875410931	1.6531072051021247e-17
ARID1A_18	CGCCACACAGTTCCAGCAG	ARID1A p.Q2207*	0.15289382953678282	0.23434992967140977	0.5798684429508623	6.18134248796135e-6
IL10_2	CTCAGTTTCGTATCTTCAT	IL10 p.R177Q	-0.0364544	0.8337687404901704	0.5791095216689254	7.916946260578734e-4
SMAD2_3	ACATGCTTGAGCAACGCAC	SMAD2 p.S465N	0.3176942037446686	0.0481134	0.5767927901216444	3.28400688318598e-4
IKBKE_7	ATTTCTGCCATTGGGGAGG	IKBKE p.X29_splice	0.0660969	0.7447166580793352	0.57352	0.00458713
PIK3R1_6	AAAAAAGTCGAGAATATGA	PIK3R1 p.R461*	0.4577982331494256	0.11780257110525652	0.5666772413875346	0.0526959
TP53_286	TATTGAACAATGGTTCACT	TP53 p.Q52*	0.5700646287682493	0.00670405	0.5662313424392512	0.00709374
SMARCD1_1	AATTCGCAGCTTCCGTTTT	SMARCD1 p.R183Q	0.0603882	0.5604746777780999	0.5644659935113854	4.5813849087312974e-8
PTEN_58	ATCCCATAGCAATAATGTT	PTEN p.G36R	0.23020659478823052	0.19726519668024392	0.5640094672219612	0.00155441
TSC1_4	GTTATTTCGTAATAAGAGC	TSC1 p.R1097C	-0.106714	0.646898	0.5638991557458078	0.0148835
TP53_259	AAAACCTACCAGGGCAGCT	TP53 p.Q104*	0.30738741624852844	0.00334647	0.5635555521758635	7.071271988715378e-8
PTPRT_63	AGCATTTCTTCTATATATT	PTPRT p.R791K	0.5586732608752562	0.0151681	0.5579166456952612	0.015323
PTEN_6	AAAGGGACGAACTGGTGTA	PTEN p.R130*	0.15748145793309648	0.32640003482393254	0.5571237373541778	4.991303636671158e-4
FLT1_8	GAGGTTTCGCAGGAGGTAT	FLT1 p.R665Q	0.3910579575946416	0.0055108	0.5556521187508999	7.81883758951841e-5
TP53_217	AGGGCAGGTCTTGGCCAGT	TP53 p.C141Y	0.29996625437047403	6.17853595262563e-4	0.5553504268439781	2.0590849730480052e-10
APC_60	GGATGTAATCAGACGACAC	APC p.Q1291*	0.2576631374256917	0.13463985724212113	0.55433	0.00125395
RUNX1_7	TTGTATCTGAAGAGAATCA	RUNX1 p.X269_splice	0.13961537181996325	0.4785407040490112	0.5532202295363139	0.00481023
CDKN2A_137	CCGATCCAGGTGGGTAGAG	CDKN2A p.Q50*	0.4248175369435901	8.74958258289456e-4	0.549756	1.6323705217098896e-5
TP53_322	TCTGAGCAGCGCTCATGGT	TP53 p.R181H	0.26525581081776844	0.0120328	0.5492245777464074	1.8477336824713432e-7
FBXW7_62	TCTTGTCTCTGGGAATGCA	FBXW7 p.S596F	0.2803202102055859	0.1985275767151145	0.5406476210354281	0.0130291
TP53_126	AATCAACCCACAGCTGCAC	TP53 p.W146*	0.17037660398522575	0.046555	0.5362141189502552	3.3053128224156336e-10
CRLF2_4	TTTCGTGGCATCAGGATGC	CRLF2 p.S128L	0.3154765745774249	0.0905574	0.5353732954743285	0.00404149
NF1_5	GAACTTCGAAATATGTTTG	NF1 p.R440*	0.27214361179634083	0.28361192809888003	0.5328232371647673	0.0354654
KDR_6	AGACGACAAGTATTGGGGA	KDR p.T677M	0.11907702569155906	0.5579220930371811	0.5320137774027678	0.00865891
NF2_1	AAATCCGAAACATCTCGTA	NF2 p.R262*	0.0745009	0.6285453604920597	0.5290029245456588	5.58765319095837e-4
PAK5_25	AATCGGGCTATTCCTCAAG	PAK5 p.S364L	0.21324027164172607	0.4430153480254367	0.527773	0.0575231
CTNNB1_27	GACATTCGGAACAAAACAG	CTNNB1 p.R661Q	0.0569568	0.710898	0.5265186476199065	5.668041469413778e-4
MSH6_9	ACAACTTCGGAGATTTTGT	MSH6 p.E807K	0.4167205865302096	0.0213158	0.5228844076230541	0.00383745
SMAD2_8	ATCGAAAAGGATTGCCACA	SMAD2 p.R120*	0.16150492747063225	0.1940440017562121	0.5210681089439896	2.6296906758867506e-5
BCOR_10	ACCTTCTCCGAGAAGAACC	BCOR p.R810*	0.23424455048056836	0.16294902891309368	0.5204061575362624	0.00190484
HLA-A_2	AAGAAATACCTCATGGAGT	HLA-A p.R30K	0.2118746973378171	0.255476	0.5152540414876654	0.00558616
CDKN2A_110	CACGCTGGTGGTGCTGCAC	CDKN2A p.T93M	0.17354612210199918	0.0475033	0.5098339109115655	5.341199945490523e-9
ZFHX3_26	AAAGCCATCGAATTTGGAC	ZFHX3 p.D270N	0.31897298131688984	0.0596466	0.5015128295018303	0.00303772
DDR2_2	ATCCAGCGGATAGGGAGCA	DDR2 p.R752H	0.0913603	0.4538678083646923	0.5010502878416195	3.7422509508094205e-5
TP53_25	TACTGTAGGAAGAGGAAGG	TP53 p.X126_splice	0.11230675330315308	0.6338879911800687	0.4953614458025232	0.035144
EPHA3_37	CACGCGAAAGTCCGAAATC	EPHA3 p.R769H	0.1996335448361176	0.10749654529606784	0.4944414163176621	6.505461363540885e-5
ETV1_19	ATCTAGGGAATAAGAGAGT	ETV1 p.X185_splice	0.19486181937437605	0.29116614109396477	0.4931217193498358	0.00738227
NSD1_8	AAATTGCGAGATGCTTTTT	NSD1 p.R1031*	0.0442572	0.8154367914656752	0.49127879002690666	0.00932562
EPHA7_2	TTACCTACTACAAGTTCCC	EPHA7 p.X909_splice	0.12805518632217086	0.3216137516876524	0.4900559639978751	1.4234499453300023e-4
BRIP1_2	GAACTAAAACGACAATACA	BRIP1 p.R798*	0.5759931006934493	0.00135323	0.48987	0.00647096
KDM5C_13	ATCCCCCTACGACAGTCTG	KDM5C p.R198*	0.33858741181443247	0.00849323	0.48823832959578634	1.4540133239475668e-4
MRE11_2	ATTTCATCGAGTGTTACAA	MRE11 p.D41N	0.4594163756852871	0.0564824	0.487128	0.043135
TP53_44	AGACCGGCGCACAGAGGAA	TP53 p.R282W	0.3296810615436199	0.00721687	0.48429165520808454	7.827758974923474e-5
BRAF_15	TTTCGTGGTGATGGAGGTA	BRAF p.R389C	-0.0431853	0.8263776719254509	0.4810939111596352	0.0139982
ARID1A_75	CCAATGGATCAGATGGGCA	ARID1A p.Q386*	0.2844976634649479	0.10348078173576604	0.4797067963182168	0.00600213
TP53_208	GATTCTCTTCCTCTGTGCG	TP53 p.E286K	0.28115765265922554	0.0343214	0.4784002159160699	3.0935216823828625e-4
SETD2_14	TGATCGTCGCTACCATAGG	SETD2 p.R432C	0.0979388	0.3819390733072656	0.4774511038600028	1.87238643490922e-5
PIK3C2G_3	TTACAATTTCATTGTAAGT	PIK3C2G p.E1394K	0.4819456153067534	0.0507242	0.4768265285587265	0.0532973
RB1_74	AGCCATGCAAGGGATTCCA	RB1 p.W563*	0.2621368782435364	0.0304571	0.47599685044161383	8.250082878125256e-5
APC_107	ACGACACAGGAAGCAGATT	APC p.Q1294*	0.3011673037157976	0.0850609	0.47288937982945983	0.00679267
KMT2C_42	TACTTTGCATTTCCAGCCA	KMT2C p.X433_splice	0.22680380274611603	0.15163557124533786	0.47230929446325376	0.00276162
NCOR1_4	TTCAGCGGTGAGTAGTTTG	NCOR1 p.R361*	0.3105961927774257	0.0543356	0.46730910773219414	0.00376162
STAG2_2	TTACAGCTTCAGGAAAATC	STAG2 p.Q275*	0.4145984576339391	0.0343553	0.4670500413864976	0.0171249
APC_109	GTTTGCAGATCTCCACCAC	APC p.Q879*	0.22626131218175768	0.02597	0.4654658813172339	4.384777291770011e-6
STAG2_12	TTCGAATTATCTCAGAGTT	STAG2 p.R146Q	-0.0245863	0.922873	0.46086493756786623	0.0683037
MAPK1_1	AAAGTTCGAGTAGCTATCA	MAPK1 p.R50*	-0.171469	0.37215954105907095	0.4599188195994584	0.016254
ERCC5_4	ATTCTTTCCTTTAGAATCT	ERCC5 p.G1080E	-0.00220072	0.991861	0.4594758407509418	0.032411
TP53_270	CAGCATCTTATCCGAGTGG	TP53 p.H193Y	0.2162922853086464	0.2550655422582417	0.4588008882205015	0.0155938
MAP3K1_18	AGAGGAACGAATGATCAGG	MAP3K1 p.R183*	0.1798372697061309	0.359403	0.4586657213172548	0.0191498
TP53_326	AAAGGGTCAGTCTACCTCC	TP53 p.Q375*	0.19657937573899437	0.0327419	0.45736877530974807	6.34793929316129e-7
NUP93_12	GCTTGCGGCGGCTGAACTT	NUP93 p.R524W	0.15658319261256398	0.091523	0.45519478802081415	8.608606151935715e-7
TP53_278	GTCCCAAGCAATGGATGAT	TP53 p.Q38*	0.2724463210927269	0.0849131	0.45376722718691576	0.00405961
PBRM1_16	TCGAACTCACCTTCGCTTT	PBRM1 p.X79_splice	0.22825032034101303	0.0300249	0.4537435293559562	1.5712256636124957e-5
FBXW7_31	TAATATTACCTTGTATATT	FBXW7 p.X195_splice	0.0906129	0.7229761781862842	0.4529996142228907	0.0754168
RAD50_10	AAAGCGGCGTGATGAAATG	RAD50 p.R725W	0.2691977595907206	0.0683771	0.4526012592270159	0.00215184
TP53_205	CCCCGCCCGGCACCCGCGT	TP53 p.P152L	0.0890893	0.21504954518549357	0.45242472614631185	2.7496839614873955e-10
GLI1_2	CTCACGCCTCGAAAACCTG	GLI1 p.R314C	0.2875475219064261	0.0129626	0.45218437215682766	9.172200213527353e-5
APC_28	GACGTTGCGAGAAGTTGGA	APC p.R564*	0.13043580375457678	0.4422813838559434	0.4518139557657908	0.00760808
EPHA7_5	GATTTCCTCTCCACCCAAT	EPHA7 p.S49F	0.00720577	0.9528610708018072	0.45010077976942914	2.100639840185893e-4
PIK3CA_12	ATTTCAGAGAGAGGATCTC	PIK3CA p.E542K	0.296127	0.0486254	0.45000669374949753	0.00269545
STK11_36	GCCCAGGTCGGAGATTTTG	STK11 p.D194N	-0.0319952	0.8067151894873388	0.4492327697318628	5.635438468088757e-4
NSD1_9	AATTGCGAGATGCTTTTTC	NSD1 p.R1031*	0.3798449841230014	0.0115794	0.4491495910687148	0.00282424
RBM10_20	CAGCTCTCAGGGCTCCACA	RBM10 p.S703L	0.020379	0.8287853518346397	0.44885146897088046	1.764374817609568e-6
ERBB2_27	GATCTGGCGCTTTTGGCAC	ERBB2 p.S728F	0.0999324	0.44127240698931014	0.44617701483767475	5.671002146598695e-4
ATRX_13	AGCGTGAGCGAGAAAAATT	ATRX p.R1514*	0.4289972529201281	0.012311	0.4443686931290971	0.00952403
IDH1_2	TAGGTCGTCATGCTTATGG	IDH1 p.R132C	0.1357690928975926	0.30099402735867375	0.4429000279917541	7.097347150677681e-4
ASXL2_1	AGAATTCGACAAGAGATTG	ASXL2 p.R357*	0.1917019390172075	0.1870330663959926	0.4428064432103205	0.00224833
GATA1_3	CCCTCCGCCACAGTGGAGT	GATA1 p.R216Q	0.0961348	0.4372488813707001	0.4417215418229033	3.4671759639521833e-4
RB1_13	AGGCGAGGTCAGAACAGGA	RB1 p.R255*	0.13274176194643791	0.4223586141810623	0.4406609766699416	0.00758526
EPHA7_23	ATCGTTTACCAGCACCCAT	EPHA7 p.R854C	0.11916572211274527	0.40224120472536234	0.4405988137396397	0.00188248
HIST1H3B_1	GATTTCTCGCACCAGGCGC	HIST1H3B p.E74K	0.7654448323872299	5.780556005184659e-6	0.4405940145800801	0.00925903
IDH2_4	GTGCCTGCCAATGGTGATG	IDH2 p.R172K	0.22616477311626623	0.0354777	0.4405319389513972	4.059133190780049e-5
RASA1_10	TCTTTTCGATAGTGATCTA	RASA1 p.R427Q	-0.134406	0.4690457785495789	0.4403551865320862	0.0171917
PIK3CA_55	GTCTCGAATATTTACATTC	PIK3CA p.D350N	0.14725630318917443	0.5234608234037876	0.4389358810281983	0.0566183
TP53_289	GAAACACTTTTCGACATAG	TP53 p.T211I	0.23210919472236072	0.22564908100076983	0.43768177566603833	0.0221888
DIS3_6	ATTCGAGGGATTCTCTTAT	DIS3 p.R382Q	0.3836071979663457	0.0182998	0.4360027407345071	0.0073069
CDKN1B_3	AAATTCCACTTGCGCTGGC	CDKN1B p.W60*	0.126446	0.23258408519623092	0.4353614660566953	3.851285767042258e-5
TP63_12	TGATTCGAGTAGAGGGGAA	TP63 p.R266*	0.2824794699214292	0.0610075	0.43330022589720074	0.0039966
EP300_4	CTTACGTTTGAGGCTGGGA	EP300 p.X1224_splice	-0.350205	0.00131664	0.4321375175498614	6.507426874724609e-5
AMER1_32	CATGGTCGAAGCTCTGAGA	AMER1 p.R531*	0.12569297797878143	0.34254318905361175	0.4306755942954001	0.00111922
MAP2K4_35	TACTTTAACTGCCATTATT	MAP2K4 p.X131_splice	0.36025144823487465	0.0819706	0.4305281064578138	0.0375686
RPTOR_10	TGCGACGTAAGGACGTGCA	RPTOR p.R139H	0.2100906312369192	0.071804842494504445	0.4301174433243826	2.214500738352014e-4
PTEN_70	ACCATAACCCACCACAGCT	PTEN p.H93Y	0.28971288193234984	0.0188719	0.4294255323603442	4.938039990513114e-4
STAG2_6	CAGCTTCAGGAAAATCAAG	STAG2 p.Q275*	0.10222584528995884	0.5366895129996284	0.4290162353385965	0.00937832
STK11_24	GGGCTCCCCGGCTTTCCAG	STK11 p.S216F	0.3226077261876526	1.0084278523846555e-4	0.4289211240931834	2.2814059941635987e-7
AR_16	CGGCCCCCTCAGGGGCTGG	AR p.Q488*	0.1156540596920568	0.1311532363637061	0.4282645613847852	2.0588858646102473e-8
PIK3R1_8	AAAAGTCGAGAATATGATA	PIK3R1 p.R461*	0.10753710778333032	0.7469264275965091	0.4275342289544583	0.19838760264199015
CDKN2A_8	GCAGCGTCGTGCACGGGTC	CDKN2A p.D84N	0.21130283685549103	0.0437376	0.4274225971271884	4.4101274149696715e-5
ETV1_7	GTAGCCTTCGTTGTAGGGG	ETV1 p.E450K	0.1409612488566929	0.3595088002901545	0.4263192187848822	0.00546356
IL7R_3	TTAAAGTTCGATCCATCCC	IL7R p.R206*	0.0858767	0.6260385880839987	0.4260899066224877	0.0153495
PIK3CA_40	GATGCACATCATGGTGGCT	PIK3CA p.H1047Y	0.3328751683240457	0.00407418	0.4258130882371288	2.357690479790207e-4
TP53_54	GGCCAGACCTAAGAGCAAT	TP53 p.X187_splice	0.2534752670814779	0.0684213	0.4225168423143611	0.00235354
PTCH1_2	TACCTCTGCAAAAGAAATT	PTCH1 p.X249_splice	0.166074	0.4255536207961904	0.4223291545864481	0.0423988
PTEN_63	ACCCAAAAGTGAAACATTT	PTEN p.W274*	-0.0606867	0.7629233584694675	0.422021	0.0352073
PAK5_5	CTCGATCGTAATCCACCTG	PAK5 p.D334N	0.21906661614556452	0.1829835779237902	0.42156715702395225	0.0102777
ROS1_15	AGTTTTTCCCGAGGGAAGG	ROS1 p.E1943K	0.1647639488383929	0.25185131723460946	0.4193414565890376	0.00348109
APC_29	ACGTTGCGAGAAGTTGGAA	APC p.R564*	0.21111616136232325	0.21457053564559775	0.4178970489361543	0.0138951
TSC1_1	TTATTTCGTAATAAGAGCG	TSC1 p.R1097C	-0.263262	0.2107812937171945	0.4156223437722888	0.0465262
SMAD4_14	GTATGCGTTTGACTTAAAA	SMAD4 p.A118V	0.2372595344985684	0.27855056049703913	0.4151572822074737	0.0577311
ARID1A_77	AATGGATCAGATGGGCAAG	ARID1A p.Q386*	0.4074827184911789	0.00540602	0.41276556917431734	0.00484159
TSC2_13	CAGGTGGCGCTTCTTGTCG	TSC2 p.R1639H	0.16664137431835577	0.0999329	0.4121963605281675	4.612002095864153e-5
PIK3C2G_9	GCTTGTTTCGTTGTTGCTG	PIK3C2G p.E1231K	0.6416049425549243	4.063612841084552e-5	0.4115150905117711	0.00862487
PIK3CB_9	TTCGAGTTCATCTAAAACA	PIK3CB p.E470K	0.25992050114012916	0.17045924697511936	0.4114399124014576	0.0298315
CARD11_13	TAGCGTCTGACGATGGAGT	CARD11 p.R576H	0.0523889	0.7654969995159832	0.411304	0.0187425
H3F3C_7	CGTGGCGCTTCGAGAGATT	H3F3C p.A47V	0.0412724	0.7298933923174256	0.4109996177769083	5.627450855369121e-4
FOXA1_11	GAAGCAGTCATTGAAGGAC	FOXA1 p.D226N	0.14756191376421057	0.23319822514938912	0.4078222165437166	9.598402342194364e-4
EPHA3_4	AACGGCATCAATCTCAAAG	EPHA3 p.V412I	0.22286408494190343	0.107232	0.4070785877849919	0.00321132
ARID2_24	TGTGTCGGGTAAATATCAC	ARID2 p.S139L	0.13547556576469855	0.4737695904195309	0.4058492039661606	0.0314729
ARID1A_37	CCTCAGCCCCAGTCTCAGC	ARID1A p.Q581*	0.04812	0.5452870870265265	0.40531896111795246	3.158110778344176e-7
SPEN_15	AGATCGTACATATTATGAG	SPEN p.R630C	0.2527877519561327	0.2213066751445132	0.4016824688360896	0.0516359
TGFBR1_18	CCATCGAGTGCCAAATGAA	TGFBR1 p.R157*	0.13339533501226106	0.3265928779746944	0.4013345273821614	0.0030879
XPO1_1	TTCGCATACTTCTAATCAA	XPO1 p.R749Q	0.8029684281352889	2.171996070633494e-5	0.4011889793931609	0.0344567
PLCG2_27	GATGTCCTCGACGTAGTTG	PLCG2 p.E825K	-0.159058	0.38682443685352297	0.4008968722601116	0.0287021
PLCG2_25	AGATGTCCTCGACGTAGTT	PLCG2 p.E825K	0.0204241	0.8744695368017154	0.4004591099199702	0.00187893
TP53_75	CCTGTCCTGGGAGAGACCG	TP53 p.P278L	0.2545814759313419	0.00877905	0.39964930829545886	3.803300830571037e-5
STAG2_9	TCATTTTTCGAATTATCTC	STAG2 p.R146Q	0.1582840720576139	0.5315799217274259	0.399572	0.11347532564374938
FLT4_14	AAGGCGAGACCTGCATTCT	FLT4 p.A1158V	0.24233919765128972	0.0655486	0.39907191687897486	0.00240649
MED12_14	AACCTTGTTTTACATTCAA	MED12 p.G44D	-0.0706404	0.7546255820216562	0.3979423629616995	0.0776694
CDK8_1	ATGTCGGCATGTAGAGAAA	CDK8 p.S62L	0.0059528	0.9651671023171003	0.3974677863988232	0.00341738
PREX2_20	TTCGTGGCCGGATCAACAC	PREX2 p.R297C	0.1617422787743919	0.0945084	0.3971246927005248	3.8741813966185293e-05
TET2_4	GTTTGGTGCGGGAGCGAGC	TET2 p.R1214W	0.1504881310318823	0.1821366226823699	0.3962489393791663	4.329273291946318e-4
B2M_2	TTCATAGATCGAGACATGT	B2M p.R117*	0.3818675533080216	0.0875204	0.39613222045737384	0.076339
MSH6_6	TACTGCAACATTTGATGGG	MSH6 p.T1219I	0.21172697548927985	0.17969303486261895	0.3960773615622301	0.0119331
SETD2_16	CTCTCGTTTCATGAATCAC	SETD2 p.R1625C	0.0564798	0.8100161134470893	0.3936428200693286	0.0931488
CHEK2_15	TACCCTGAAAATCCGAAAG	CHEK2 p.X148_splice	0.245641	0.1492413488350844	0.39204171493649065	0.0211836
APC_56	TGCAAATAGCAGAAATAAA	APC p.Q1303*	0.089691	0.7825798142132593	0.39192876942356103	0.2269770611127812
ETV1_17	AATCTAGGGAATAAGAGAG	ETV1 p.X185_splice	-0.415799	0.1713949881302474	0.39141436524027623	0.19447085479507265
TP53_148	TGGCAAAACATCTTGTTGA	TP53 p.C135Y	0.0307804	0.8539224627732854	0.3906415441671392	0.0190286
PTPRT_93	ATATCGCACCACCACAGGC	PTPRT p.R328C	0.14640628968814043	0.19525236526850087	0.3904093713948569	5.401364001445096e-4
TRAF7_3	GCCGCTGTACAGGTAGCTC	TRAF7 p.G536S	0.16323958660148694	0.201849	0.38891038303635533	0.00231114
IKZF1_12	TCAAGCATTCGTAAATCCT	IKZF1 p.R83Q	0.1491751788683754	0.3698782119237384	0.3869737594109971	0.0198269
PTPRD_54	GAAGACGTATGATGCTCCC	PTPRD p.V892I	-0.112789	0.4503852678931683	0.3860097457736597	0.00950824
APC_64	GTAAGCAGAGACACAAGCA	APC p.Q789*	0.15718280625776906	0.31228308119567333	0.38090917301505417	0.0141859
RAD50_5	ATTTCGTGATGTCAATGGA	RAD50 p.R87C	0.1965148916229055	0.3268952596764238	0.3808149888058702	0.0571738
BCL6_3	ATTCGAGTGTGGGTTTTCA	BCL6 p.R594Q	0.18403412307354752	0.16130048252695195	0.3807546600691931	0.00368059
TP63_7	TTTCGACATGCGATCTGGA	TP63 p.R594*	0.13824283186538197	0.29055197201367033	0.3798235615424695	0.00362301
KMT2D_48	AGAGCCTTCCGGGACTTGC	KMT2D p.R3539Q	0.026653	0.813008	0.37907181173601506	7.487023420152531e-4
TP53_262	CTGGGACGGAACAGCTTTG	TP53 p.R267W	0.15502791933424925	0.2046004749676188	0.37905517460288846	0.00188207
CHEK2_1	TTCTCTGAGCATAGGACTC	CHEK2 p.S428F	0.0888067	0.6281847899931061	0.37554284300118734	0.0401385
MTOR_13	GGACGCTCACATTGCTAGA	MTOR p.V21I	0.17313853269463725	0.0981163	0.3734371312174599	3.5038859691354613e-4
ETV1_15	GCGAAATCTAGGGAATAAG	ETV1 p.X185_splice	0.27065704955273506	0.1201005944584083	0.3733785277909708	0.0318806
RB1_97	TGTCAGAAATTAAAGATAC	RB1 p.Q62*	0.40667107856202694	0.1693135028082512	0.3732574504678242	0.20737257972739348
CDKN2A_37	CGCTGCCCGGGAGGGCTTC	CDKN2A p.R87W	0.20416628943892937	0.0534936	0.37294841027593034	4.1435425496240896e-4
RB1_123	GAGTTCGCTTGTATTACCG	RB1 p.R451C	0.3027239981375449	0.10109987279115308	0.3704747990948973	0.0447453
PTPRD_13	TTCGACCACCATTTTGGTA	PTPRD p.S431L	-0.0258088	0.8249024849748263	0.3697629308880459	0.00146298
TP53_332	GGCTGTAGGAGACAGAAGC	TP53 p.X367_splice	0.18251078454141836	0.26834973948761315	0.3695097716644284	0.0248224
SMARCB1_13	CTCATCCGCCTGGAAGAGG	SMARCB1 p.R374Q	0.0333505	0.7814371504636752	0.367498	0.00217688
KDR_25	TCTTATCGGAGAAGAACGT	KDR p.S1037L	-0.0597208	0.7498800532525188	0.36619479929628934	0.0498539
TP53_295	CCCAGAAAACCTACCAGGG	TP53 p.Q100*	0.29212002189798547	0.0294571	0.36589143998024265	0.00635938
AMER1_7	GGCCCGAGAGGTTCGTTGT	AMER1 p.R631*	0.26761108946963363	0.0553994	0.3654498849086597	0.00885641
TSC1_17	CAGTTCTCAGGGCGCCAGC	TSC1 p.Q527*	0.0723122	0.49467	0.36521327594263914	5.520369043004497e-4
RICTOR_2	AAGACGAAATATATCATAA	RICTOR p.R336H	0.0268552	0.89142	0.3651259035096414	0.0625851
PREX2_8	GACAAGTTTCGTATCTATG	PREX2 p.R117C	0.17663565552655455	0.3993526413050234	0.3647400455888647	0.0811914
PGR_4	ATTTTCGACCTACAGAGAA	PGR p.R637Q	0.11759941013854693	0.4642954248379429	0.3625667246325227	0.0236563
ARID1A_52	GTCAAATGCATGGACAGCC	ARID1A p.Q840*	0.18406439415476816	0.23802094582144412	0.3615893136875888	0.0202957
PTPRT_77	TGTTCGTCTGGCTACAAAA	PTPRT p.R721C	0.3109328358792279	0.00588459	0.3610459168617603	0.0013802
PTPRS_10	AGAACAATTCGACGATCGT	PTPRS p.S1773L	0.1697295486839331	0.33565209929541334	0.3609032191984323	0.0403106
FBXW7_28	ATATTACCTTGTATATTCT	FBXW7 p.X195_splice	0.2831010514083822	0.23621117340214204	0.35993630462838316	0.1318899612955784
PIK3R1_4	TCATCGAGATGGGAAATAT	PIK3R1 p.R386*	-0.235856	0.33526785607360793	0.3575459551402219	0.142935
RB1_44	TTACATATCTGCTGCAGTG	RB1 p.X605_splice	0.15089790376131834	0.337553	0.35712220646857856	0.0230048
RET_5	GAGACGGCTGGAGTGTGAG	RET p.R525W	0.2608846647951254	0.0112262	0.3565039030020576	5.242583067432091e-4
CTNNB1_17	GAATGGATTCCAGAGTCCA	CTNNB1 p.G34E	0.2434115207999105	0.15832875088411685	0.3564155349481779	0.038712
TP53_160	CTTCAGGTACTAAGTCTTG	TP53 p.Q331*	0.0753831	0.6683149640158679	0.3563559250307441	0.0424598
TP53_171	ACTTCCTGAAAACAACGTT	TP53 p.P27S	0.062302	0.6717244924921759	0.3548989377789395	0.0154708
STK11_28	ATCCGGCAGCACAGGTGAG	STK11 p.R304W	0.26580918973212386	0.11901381211554686	0.3532932138447607	0.038173
KMT2C_3	TGAAAAGGCAGCAACAGCA	KMT2C p.Q1719*	0.3390627879156316	0.0182454	0.3525544058314137	0.0141146
EPHA3_19	AAATTCACCTGTTATAAAG	EPHA3 p.E631K	0.19580198410079772	0.3921236498283978	0.3522984919866881	0.1230366930673246
CHEK2_3	CTCTGAGCATAGGACTCAA	CHEK2 p.S428F	-0.0634092	0.7662911945379784	0.3520153789822258	0.0979944
ROS1_8	TTCCCTTGTACTACAGACA	ROS1 p.S819F	0.42518163727544056	0.0256851	0.35087159466074236	0.0658241
CASP8_17	GAGAGCGATGTCCTCGGTA	CASP8 p.R491*	-0.0806451	0.542562	0.35045780968637114	0.00792036
PAK5_16	CTTCATTCATTCTGGAAAG	PAK5 p.E542K	0.11265683217545794	0.6051121659573788	0.3500485022736627	0.10745518447618076
ESR1_8	CTGGGCGAAGAGGGTGCCA	ESR1 p.A361V	0.0928707	0.47115560713627946	0.34950833863497605	0.00658397
INPP4A_13	AACTTTTCCGTAAGTCCCT	INPP4A p.G973R	0.3385496656294992	0.0322018	0.3461240036605481	0.0285495
NF1_36	CCAAACGACAAAGAGTTAC	NF1 p.R1968*	0.19118380777762628	0.16894281835947655	0.3450917797007896	0.0129196
TGFBR1_9	ACAATTGCGAGAACTATTG	TGFBR1 p.A202V	0.2968149963144829	0.2082572144632278	0.3446099959968583	0.1439452156576835
RNF43_8	ATGGCCGGGATGCTGGCGA	RNF43 p.G347D	0.19007423203156637	0.0397155	0.3439838971365314	1.9349395337282745e-4
ETV1_6	GCCTTCGTTGTAGGGGTGG	ETV1 p.E450K	-0.0327493	0.8112313721252559	0.34390340692508253	0.0117829
TCF7L2_4	ACTTGGTGACGAGCGACAG	TCF7L2 p.V597I	0.0771651	0.3728151592742163	0.3434919771385834	7.01211648501185e-5
PRKN_2	ACCTTTTCTCCACGGTCTC	PRKN p.W74*	0.0531284	0.6701743196651739	0.34193750676365864	0.00601453
SPEN_9	ATTCGTCCCAAGAAATCAG	SPEN p.S2411L	0.11305850989478906	0.38513468285092306	0.34098341136207927	0.00864522
FBXW7_50	ACCGAATAGTTAGTGGTTC	FBXW7 p.R393*	0.6560640641025511	6.449603614154009e-5	0.3409643716211447	0.0383535
KMT2D_93	TCCGGCGGGTCTACATTGA	KMT2D p.R5154W	-0.0270435	0.8177848552497171	0.3396567628695749	0.00372318
NF2_19	CATCTGCAATAACAAACCA	NF2 p.X38_splice	0.0918333	0.6003875189333665	0.3389053090219959	0.0527323
PBRM1_11	TTTTCTCACCGGTAATACT	PBRM1 p.X332_splice	0.11584011617932294	0.6236114835412799	0.33861171908525495	0.15085384923452735
WT1_3	GTTATCGCTCTCGTACCCT	WT1 p.D342N	0.158086	0.3910696415414891	0.33848286715618964	0.0660095
GLI1_26	ATGTTTTCGCAGCGAGCTA	GLI1 p.R380Q	0.4165765287453728	0.00520258	0.33842357606484724	0.023326
NF1_15	CTCCATCGAATCATCACCA	NF1 p.R416*	0.4566128512709426	3.026769569404939e-4	0.3378420123920488	0.00759997
MAP3K1_15	GAGGAACGAATGATCAGGG	MAP3K1 p.R183*	0.27400090727788234	0.2393569422776519	0.337362	0.1471688622895784
MSH2_5	TTCGACAAACTGGGGTGAT	MSH2 p.R680*	0.20618117919152928	0.15508388695008343	0.3364472525393463	0.0202024
MSH2_3	ACATATATTCGACAAACTG	MSH2 p.R680*	0.1703545551555989	0.4380935554783194	0.3363278216670915	0.12543594639071462
RAD50_2	AATTTCGTGATGTCAATGG	RAD50 p.R87C	0.12937926468060337	0.4414270939201767	0.33579590326805747	0.045294
RNF43_25	CTGAGGATCGAGCTGCTGC	RNF43 p.R145*	0.12203246794251124	0.18002138201056306	0.33544404127443905	2.239833343236733e-4
NTRK3_1	TGGGATCCTTCAGGGCCTA	NTRK3 p.D576N	0.0956955	0.43002563581871567	0.3352580287673885	0.00558432
MUTYH_2	GCCAGCAGACCTGAGAGGG	MUTYH p.G382D	0.0773339	0.5553287642810516	0.3348744333007011	0.0104871
ARID1A_24	AACCGAACAGATGAAATGC	ARID1A p.R1528*	0.0627342	0.686499	0.3342026364143527	0.0311703
APC_25	CGTTGCGAGAAGTTGGAAG	APC p.R564*	0.5006107823081704	8.480601404756701e-5	0.3339636041322088	0.00889939
PPP2R1A_11	GTCCTGGCGCGTCCGCTAC	PPP2R1A p.S256F	0.10028906334665964	0.2041609952615069	0.3334703039428588	2.360423002593907e-5
KMT2C_20	CCCCTACTTCGAGGTCTAC	KMT2C p.R56Q	0.36636319856652866	0.00289675	0.332808	0.006848
APC_119	TTCAGGAAAATGACAATGG	APC p.Q1529*	0.17918851062412627	0.20041644462699745	0.3327209652256746	0.0172955
ARID1A_51	TCCTTCGCTCAGCAGCGCT	ARID1A p.Q268*	0.1778109842494049	0.0704271	0.3322309122055098	7.133629175138097e-4
ASXL1_9	CTCCTCAGAGCTGGGTGTC	ASXL1 p.Q1063*	0.25626272776564346	0.2695720206820838	0.33216164420648026	0.15238800287037538
TP53_291	AAACACTTTTCGACATAGT	TP53 p.T211I	0.3831866909017095	0.0500669	0.3319242749581525	0.0898157
BCOR_2	GTCCGACTACTTCTCTCTT	BCOR p.R1547*	0.17053751115443297	0.0647925	0.3317923059429331	3.1946059503709895e-4
NF2_22	CGCTCGAGAGAAGCAGATG	NF2 p.R341*	0.1994525281658263	0.5027924235128544	0.33177663984140127	0.26496819592889825
PTPRT_26	CAGACGAACACAGTTGATT	PTPRT p.R721H	9.82205778849419e-5	0.999482	0.3312375284996117	0.0280237
TGFBR1_11	GAGATAGGCCGTTTGTATG	TGFBR1 p.P83L	0.047943	0.7943910844883914	0.3309830879837738	0.0714193
KMT2D_87	CCGGCGGGTCTACATTGAG	KMT2D p.R5154W	0.0605028	0.5332797292017817	0.3305443297118836	6.413467061093151e-4
EP300_5	TTACGTTTGAGGCTGGGAA	EP300 p.X1224_splice	0.42597299512422854	0.21354425222279644	0.3302788123776763	0.33553538320465426
PRDM14_4	GTTTAGGCTGGAAGATTGA	PRDM14 p.S475N	0.10133430941249091	0.5099089122700141	0.33005218133751213	0.0314047
ATM_38	ACTTTCGAATTCGAGTGTG	ATM p.R248*	0.019262	0.9175909661770194	0.33000340351290086	0.0756067
EPHA7_18	AGAATTTTCCTCTTTAGTC	EPHA7 p.S225F	0.0847065	0.6192386236566001	0.32988616100388435	0.0523643
TSHR_9	GCCCCCGGTATGCCTGAGC	TSHR p.R707Q	0.16112873393848023	0.0975822	0.3280783719858469	7.281557668649672e-4
CREBBP_38	AACAACTGTCGGAGCTTCT	CREBBP p.S71L	-0.156059	0.17212053894105914	0.3277672507387955	0.00396769
KMT2C_21	CCCTACTTCGAGGTCTACA	KMT2C p.R56Q	0.1981840148468867	0.18951015694045295	0.3276523774158702	0.0299241
ETV1_18	AAATCTAGGGAATAAGAGA	ETV1 p.X185_splice	0.15543313660623834	0.6038118264010681	0.32748674010241535	0.273298
ERCC3_6	AGTGTGCCGACCAACCCAT	ERCC3 p.R109*	0.15539050603728144	0.11492221219315592	0.32702795371656984	8.936323465499798e-4
POLE_11	GCCCCCTCGGCCTCCTGGG	POLE p.E2038K	0.0918346	0.4194029408797766	0.3269907012697674	0.00394617
PAK5_6	CGATCGTAATCCACCTGGG	PAK5 p.D334N	0.1871477009067973	0.20822315014342255	0.32681370781643593	0.0278025
RB1_49	TGCTTACATATCTGCTGCA	RB1 p.X605_splice	0.26730446109426653	0.0565917	0.32639442465132823	0.0198658
ERBB4_19	CATCTCCTTCCAAGAGTCT	ERBB4 p.G870R	-0.222072	0.1270989768576498	0.3258537422346264	0.024343
PAX5_9	GATTTTTTCCACCACTTTG	PAX5 p.E97K	0.2236365712025121	0.3020652386908348	0.32582489174385965	0.1324977560617853
FLT1_7	GGTTTCGCAGGAGGTATGG	FLT1 p.R665Q	0.307454	0.0436119	0.32557840756384543	0.0326301
CASP8_3	CTTCCGAATTAATAGACTG	CASP8 p.R127*	0.2519375467811381	0.4172995522988713	0.3241684600044607	0.29642780871451047
GATA1_12	CACTGTGGCGGAGAAATGC	GATA1 p.R270W	0.142292	0.3058051626747338	0.323739	0.0196568
NEGR1_8	ATTTAATTTCCTGAATAGT	NEGR1 p.E229K	-0.185498	0.3656075177166271	0.3234413390205222	0.11258562938355228
RBM10_5	AGCCCTCCGCGAGGACTGG	RBM10 p.R648*	-0.0211638	0.8166871844105709	0.32286855174478984	3.86627265762435e-4
GLI1_27	TGTTTTCGCAGCGAGCTAG	GLI1 p.R380Q	0.34084388395061865	0.0294714	0.322855	0.0392646
NOTCH1_28	CTCGCAGGGGTTGGCACCT	NOTCH1 p.E424K	0.0906628	0.2281794593423385	0.3227789371915599	1.7031538954643342e-5
CDKN2A_72	GGCTTCCTGGACACGCTGG	CDKN2A p.P146S	0.15190646302286265	0.0860632	0.3224884984223998	2.6195673576971635e-4
HIST1H3B_14	GAAGATCGGTCTTGAAGTC	HIST1H3B p.D82N	0.26470407028522946	0.0387589	0.3218643647248285	0.0119408
PIK3CA_79	TAAACAGCATGCATTGAAC	PIK3CA p.H1065Y	0.12388648798440656	0.4789298666863508	0.32175050573435904	0.0654799
TP53_260	GGTTTCCGTCTGGGCTTCT	TP53 p.R110C	0.0986493	0.3381344896434345	0.32147618001052747	0.00175273
RB1_36	TTTCTTCGTATCGTTTAGA	RB1 p.E322K	-0.086692	0.7239437429832265	0.32111326496011394	0.1893357427882651
NOTCH4_14	TACTCCGCTTCCTTGCTGC	NOTCH4 p.R1410C	-0.025112	0.8333499565081829	0.32085494431711187	0.00703413
RB1_113	ATATCCTATTAAACAAATA	RB1 p.X180_splice	0.2942947433256975	0.31647375992094506	0.32062216189439474	0.27510276841487646
PDGFRA_7	AACCGAGAGCTGAAGCTGG	PDGFRA p.R512*	0.14899950168523624	0.24066377963797753	0.32054649443150907	0.0114699
PTCH1_6	CCCCCTCGGGGGTTCCGCC	PTCH1 p.R1394Q	0.0305099	0.6582399632767113	0.3204603639715982	3.1907497834279313e-6
TSC2_2	GTCTTCGAGTTGGCGCCCT	TSC2 p.R1138*	0.0683609	0.535741	0.32035243234637983	0.00365397
TGFBR1_19	CATCGAGTGCCAAATGAAG	TGFBR1 p.R157*	0.1646520718845254	0.2284341808092919	0.32019104777582225	0.0189995
CDKN2A_23	ACCCGTGCACGACGCTGCC	CDKN2A p.H83Y	-0.0461685	0.6479469827537641	0.319396	0.00151974
PTPRT_85	TACGATTTCCACGTTCTGT	PTPRT p.V396I	0.23204687825955211	0.19421438958630577	0.319194	0.0739687
HIST1H3B_15	ATCGGTCTTGAAGTCTTGG	HIST1H3B p.D82N	0.00746322	0.958126	0.3163206271886844	0.0256978
GRIN2A_70	GATGAATTCCCTGTAGCCA	GRIN2A p.E182K	0.0255477	0.8830335343574814	0.3155832897328137	0.0682512
GRIN2A_104	AGACGCGTGTACAAGAAAA	GRIN2A p.R1452C	0.2001319232544489	0.6060045147287696	0.3155753489594785	0.4159888783627297
PTPRT_56	GACACCCCGTGTGCGGCCC	PTPRT p.R1207C	0.19670613108351143	0.00847854	0.31543046782951156	2.3925155134738377e-5
APC_68	AGTTCGAAATAGCTCCTCA	APC p.R2237*	0.218681	0.19350440054233445	0.315392	0.0606367
PTPRD_38	AGATTTCCATTCCAGAAGA	PTPRD p.S912F	0.20695353898401073	0.22131709781459183	0.31488177756329644	0.0625432
CASP8_16	AGAGAGCGATGTCCTCGGT	CASP8 p.R491*	0.24030820865863467	0.0880589	0.3143497176404078	0.0256232
PIK3R1_9	AACTTCGAGATACAGCAGA	PIK3R1 p.R348*	0.2839022383497268	0.10542742785161414	0.3136709936641748	0.0736168
PREX2_2	TAGATTTCGCTATGATGAT	PREX2 p.R463C	0.19063401510358433	0.24166077253722665	0.31319775795331495	0.0541797
PIK3CA_16	TTCTTCCCTTTCTGCTTCT	PIK3CA p.E81K	0.16026245320393348	0.10563765807209714	0.3119075772871824	0.00161427
DICER1_11	TTCATATATGAGAAGCAAA	DICER1 p.S1344L	-0.0430831	0.8717832925272546	0.3117186637844679	0.24200588026841585
GLI1_6	GGGGAGCGGAAGGAGTTCG	GLI1 p.R265W	-0.0232618	0.8834010448589101	0.3116604651005955	0.048598
KRAS_5	TGCTGATGTTTCAATAAAA	KRAS p.A146T	0.19566702691102825	0.5057207883329677	0.3115592954587247	0.2890195346139071
STK11_11	CTCCATCCGGCAGATCCGG	STK11 p.S299F	0.0336037	0.7613040760674155	0.3113488073633699	0.00480274
ATRX_17	GGCGACGTATTAAGGTTCA	ATRX p.R1426*	0.5133800629255347	0.0225691	0.31117434290540275	0.16789407784396093
KDM6A_28	GTTTTTCCACGGCTCCTCT	KDM6A p.W632*	0.2539527688129386	0.00345714	0.3108057281404172	3.43869512666392e-4
STAG2_8	GTCATTTTTCGAATTATCT	STAG2 p.R146Q	0.25476597858056643	0.39781279038637574	0.3097836711466232	0.3037504691636147
SF3B1_5	GTCCGTAACACAACAGCTA	SF3B1 p.R625C	0.14319308299399994	0.37151927113429867	0.30958228264604226	0.0530879
E2F3_5	AGCGAAGGCTGGAGCTAGG	E2F3 p.R134*	0.1886266320770879	0.0767287	0.30934924433868016	0.00366062
FUBP1_1	AATTCGTGGCACTCCACAA	FUBP1 p.R430C	0.1361430462597747	0.2530653470365727	0.3093464464451687	0.00931469
MED12_9	CTCACTTCGAGGGTCCGCT	MED12 p.R585Q	0.10253993269340855	0.30064780462556706	0.30934071168116106	0.00176683
EPHA5_34	GCACGTACAGCAGCAGGCT	EPHA5 p.R543C	0.0615199	0.6312296420764032	0.3091702878814929	0.0156576
SMO_10	TCACTCCCGCACCAACCTG	SMO p.R772C	0.2030390879488548	0.0442542	0.3076369356535155	0.00228939
TP63_50	TGGAATACTGCTTAGAGTT	TP63 p.X193_splice	0.3933269805826339	0.0153568	0.3076039705968246	0.0582787
TP53_167	CAAGGGGGACTGTAGATGG	TP53 p.X33_splice	0.0674908	0.6749771884318062	0.3074429543097178	0.0555192
SPEN_16	ATCGTACATATTATGAGAG	SPEN p.R630C	-0.147319	0.498152	0.30702722585871944	0.15557767387769608
PTEN_29	CACATATCATTACACCAGT	PTEN p.M134I	0.38532212330269205	0.0358625	0.3070071746349233	0.0947904
RET_6	GCAAGAGACGGCTGGAGTG	RET p.R525W	0.10271580980337214	0.29048314102559997	0.3061045471290141	0.00159782
RB1_88	ACATCTCAGAATCTTGATT	RB1 p.Q504*	-0.0961816	0.6487646417468271	0.3057994873965545	0.14583426902238728
PIK3CD_20	GATGTTGGCGATGGTGTCT	PIK3CD p.A835T	-0.0829852	0.6071679004261417	0.30557324952457626	0.0577447
PPP6C_1	CAAATTCGAACCATCGAAC	PPP6C p.R177*	-0.0825379	0.6202848354644418	0.30543739890414806	0.0655579
ERBB4_24	GTTTTCCTCCAAAGGTCAT	ERBB4 p.G918E	0.34630324068008533	0.0539771	0.3043670000845256	0.090451
ALK_8	GAGGTCTCCCCCCGCCATG	ALK p.G1202R	0.0705948	0.4411127857936063	0.3040568284320834	8.834011222033922e-4
PIK3R1_18	GAAAACTCACCTGGGATGT	PIK3R1 p.X475_splice	-0.0484792	0.7091355747563086	0.3039320343913712	0.0188162
EGFR_69	GTCTTGACGCAGTGGGGGC	EGFR p.V592I	0.0304239	0.7911883359849012	0.30373120550031196	0.00802806
TP53_37	CATCTTATCCGAGTGGAAG	TP53 p.R196*	0.2589993554842787	0.15626250656757207	0.3032621749518517	0.0968473
GATA3_2	CAGAAACCGAAAAATGTCT	GATA3 p.R366*	0.0429717	0.7915622727685652	0.30283695596501187	0.0619166
NTRK3_5	TGTCCCTGACGGAAGTACT	NTRK3 p.R518H	0.1802362840175534	0.29205978308307495	0.30233244955257627	0.0769529
MED12_11	CTCTCACTTCGAGGGTCCG	MED12 p.R585Q	0.2753251290819395	0.0450507	0.3018676593429297	0.0279894
FGFR3_10	TCTTCATCATCTCCATCTC	FGFR3 p.M528I	0.4195034700808488	0.00207685	0.299804	0.027939
GRIN2A_49	CCCAGTCATCGTAGGAGAC	GRIN2A p.D282N	-0.0351312	0.8130628121721266	0.29949398982819986	0.0431465
ARID1A_92	AATCCACCAATCTCCTTCA	ARID1A p.G1062D	-0.0836044	0.528791	0.2985096689318324	0.0240866
ASXL2_17	TGAAGAATTCATTGTTAAG	ASXL2 p.E330K	0.33613995379296335	0.11865368996866482	0.2980608478497504	0.16668338787820888
GRIN2A_29	CCTTGCGGAAGTTTTCACT	GRIN2A p.R1159H	0.11132610520847934	0.29734619653035493	0.29806013606416676	0.00522326
BCOR_13	CTTCTCCGAGAAGAACCAG	BCOR p.R810*	0.18155782477177665	0.3053163692740227	0.2977558400043841	0.092575
MAP2K4_19	AGCGCATCACGACAAGGAT	MAP2K4 p.R281*	0.0827047	0.5503345224050731	0.29654053076848624	0.03187
APC_75	AAGTGAGCAAAGACAATCA	APC p.Q1065*	-0.279218	0.10025812264141176	0.2956132422431436	0.0804029
AXIN2_4	ACTTTCGCCAACCGTGGTT	AXIN2 p.S244L	0.0235791	0.8440357889958865	0.2952964642964519	0.0134886
EGFR_64	CATCGAGGATTTCCTTGTT	EGFR p.D761N	0.0369539	0.7385533387795981	0.29473603566361134	0.00759236
PTPRD_22	GTTTCATCCAGTTGTTGAC	PTPRD p.W466*	0.11219984918616498	0.5436312334723552	0.29460080830780594	0.11032576494764736
IKZF1_56	CCCCGCACTGATTGCACTG	IKZF1 p.G151R	0.35406361489706306	0.00268778	0.2939157432717413	0.0127598
MAP2K4_12	CTCTGTTAAAATATTGGGA	MAP2K4 p.X73_splice	-0.114167	0.6478654700982168	0.29372998635156106	0.23852282931377905
NCOR1_5	GATTTCAGCGGTGAGTAGT	NCOR1 p.R361*	0.19002258229943175	0.33973097281653086	0.29350869277826175	0.14000904265973485
MAP3K13_3	TGGCGCCAGAGGTGATACG	MAP3K13 p.A321V	0.050873	0.7380411857014644	0.2933455379731407	0.0534128
ARID2_25	GTGTGTCGGGTAAATATCA	ARID2 p.S139L	0.0540429	0.7885466490803349	0.29325726284004294	0.1445375936440896
SDHD_7	GGAGTTCGAAGCAACAGAG	SDHD p.R22Q	0.21163706359365003	0.18432984411910852	0.293174	0.0657356
PTPRT_69	ATGCCATACCTGATAGAAA	PTPRT p.X162_splice	0.1884178899981158	0.3728387148071891	0.2923278682446187	0.16647979438442967
PREX2_17	AAATCGTGTTTAAACAGCA	PREX2 p.S658L	-0.0514256	0.814865	0.2920576662080838	0.18207680257430733
RB1_20	CACGAAAAAGTAACCTTGA	RB1 p.R358*	-0.0659054	0.7094788316598097	0.29204200511597095	0.097842
FAT1_20	ATTTCGAGCAACCAAATAC	FAT1 p.R2597*	0.4347683825209403	0.0274267	0.29078633515615054	0.1407666913126574
PPP2R1A_24	GTAGTCATGCGGTGCAGGT	PPP2R1A p.R498H	0.20459720556497485	0.0822192	0.2897429024851032	0.013785
SMAD4_1	CAAAAGCGATCTCCTCCAG	SMAD4 p.R361H	0.2896671009258559	0.0201532	0.28966227762260865	0.0201721
H3F3C_6	GGTACGCTTCGCTAGCCTC	H3F3C p.E97K	0.1250134519882885	0.15011680474827388	0.2893811215667511	8.488784010378664e-4
PIM1_4	CACCAGCTCTCCCCAGTCG	PIM1 p.X80_splice	0.24575339105263688	0.00378157	0.2890617817206057	6.572936466563182e-4
PTPRS_9	AATTCGACGATCGTGGTGA	PTPRS p.S1773L	0.0959559	0.5762758381332731	0.289054	0.0919279
MAP2K4_25	AGAGAATTCGGTCAACAGT	MAP2K4 p.R134W	0.22899177087379596	0.17308406389664108	0.28901383704540956	0.0854512
KMT2A_2	TCCTATTCGATCTGAACCA	KMT2A p.R745*	0.28010807929965675	0.10236219942564576	0.28857388862175554	0.0924414
RB1_52	CATCGAATCATGGAATCCC	RB1 p.R556*	0.0813783	0.5071651791209472	0.28839890372845245	0.0185098
H3F3C_15	GAGATTCGTCGTTATCAGA	H3F3C p.R52C	0.0573707	0.7791823652569915	0.28797679063333104	0.1585660001464896
CDH1_22	CTCCTCCGAAGAAACAGCA	CDH1 p.R732Q	-0.0094852	0.929858	0.2878500947816471	0.00735931
RNF43_1	CCACGACCTGGTCCCTTCC	RNF43 p.R371*	0.11191040184466308	0.1319751478496091	0.2876963490917347	1.056984635858063e-4
AMER1_23	AACCGAGATGGGACCAAGC	AMER1 p.R353*	-0.062258	0.6545285469808866	0.28741145798716394	0.0384601
PTPRS_57	CCCGTGGTGCGGCAGCGCA	PTPRS p.R610W	0.0515328	0.5452326753971417	0.28679892529614426	7.481764809866874e-4
SMAD4_62	AGGTCAGCCTGCCAGTATA	SMAD4 p.Q224*	0.2115832870266066	0.13249483517865215	0.2864134533743878	0.0416383
NFE2L2_3	ATACTTCTCGACTTACTCC	NFE2L2 p.R34Q	0.2615497501167672	0.087311	0.2853366898902607	0.062148
MAP2K4_22	GCCGATTTCCTTATCCAAA	MAP2K4 p.R304*	0.17053106316669614	0.14530837239078603	0.285337	0.0147287
KDR_10	TCAGACGACAAGTATTGGG	KDR p.T677M	0.32262128002348606	0.033173	0.28498278257558995	0.0600226
ERBB4_39	GTTTCGTTACCTGCCTCTG	ERBB4 p.R95C	0.0823827	0.39094910486023743	0.28428100042595394	0.00301535
INPPL1_1	AATGCGATACGTGTGCACA	INPPL1 p.R70H	0.24006359940960692	0.1547894414879485	0.2842803772258737	0.0919549
CARD11_36	GAGAGACGGGGGCTGACCC	CARD11 p.R888H	-0.00730175	0.946045	0.2825616880402354	0.0087244
PTPRD_27	AAATCGTGGAAACAGTGCT	PTPRD p.R1088C	0.1060215252660624	0.42365906214770055	0.2824156064654675	0.0327811
STK11_2	ATACTTACTTCTTCACGTT	STK11 p.X97_splice	0.611834	0.00251835	0.28236423698724517	0.16430042867706587
ERBB2_3	TGGGATCCTGCACCCTCGT	ERBB2 p.S310F	0.1336489459670367	0.1695605635673653	0.28229242704192903	0.00366452
PTPN11_9	TGCGGTCTCAGAGGTCAGG	PTPN11 p.R498W	-0.0298669	0.8299504350593054	0.2815239627852066	0.0424762
HGF_10	CTTCTTCCCCTCGAGGATT	HGF p.E183K	-0.000833351	0.9939075084814456	0.2813913500815181	0.00971127
RRAS2_5	CCTGCTGTATCCAAAACTA	RRAS2 p.A70T	0.16868235416287647	0.2914529237722119	0.2812241205771387	0.0783346
PTPRD_1	AGGTTCGCTGGGAGGCCCC	PTPRD p.E406K	0.3175122705573122	0.00232503	0.2800954721936508	0.00725937
APC_47	TCGTATACGACAGCTTTTA	APC p.R232*	0.5409959149189559	0.0239084	0.2799910010905614	0.24391262320455995
CRLF2_2	TGAGATTTTCGTGGCATCA	CRLF2 p.S128L	0.100115	0.5749575175497124	0.2786591048373856	0.11819943489644788
CREBBP_3	GACCGAGTGAACAAATTTT	CREBBP p.R1341*	0.2773376098107982	0.0945948	0.2782970914292586	0.0935169
IKZF1_26	TGGAGTATCGCTTACAGGG	IKZF1 p.D22N	0.10841409371657476	0.51982	0.2777492663120813	0.0987291
EPHA7_20	AATTTTCCTCTTTAGTCGA	EPHA7 p.S225F	0.3071472595968148	0.0594843	0.2773484827459903	0.088954
DIS3_2	ATAGATCGTCTTGCTTGTT	DIS3 p.R210C	0.2372099035392491	0.1463451327903881	0.27498543405282927	0.0921571
TET2_1	AGCTTCCTTCAGAAGGAAA	TET2 p.P419S	-0.0761341	0.636936	0.2746554177426241	0.0873564
RAD52_5	GCAGGTTCGAGTCTCCACG	RAD52 p.R278*	0.2488644663883594	0.00841635	0.27439446689582275	0.0036688
EPHA7_17	CAGAATTTTCCTCTTTAGT	EPHA7 p.S225F	0.21842694572755017	0.16420202529511996	0.2736524808775208	0.0812884
FBXW7_72	GAGTCTATTCATTACAGGT	FBXW7 p.S546L	-0.253253	0.2902379618965787	0.2732278059236934	0.2513629133248558
PTPRT_68	CCATACCTGATAGAAATGT	PTPRT p.X162_splice	0.10933662465277884	0.5575070637272561	0.27233248279471806	0.143411
SMAD2_11	GCATTTCGGTTAACATTGG	SMAD2 p.R321Q	0.1372269833412554	0.505662	0.2720381825902234	0.18664691844241893
KDR_2	TTACCTTTCGCGATGCCAA	KDR p.R1022Q	-0.0814612	0.4446207257043427	0.2719676741315413	0.0104752
ERG_1	AGTAGCCGCCTTGCAAATC	ERG p.R302C	0.0875311	0.4584403988830237	0.27184762164744186	0.0211997
PAK5_14	TCTTCATTCATTCTGGAAA	PAK5 p.E542K	0.37040103259752766	0.0170069	0.2717895168174454	0.08036
PDGFRB_10	TGTTACTCGGCATGGAATG	PDGFRB p.R150Q	0.2024330403505525	0.2957866392260778	0.2706978302601877	0.16194163831795377
AR_21	ATGCGGTACCTGGGAAGGA	AR p.X773_splice	-0.0643308	0.6810860644123335	0.27040026960081914	0.0833429
IL7R_6	TTTCCATAACACACAGGCC	IL7R p.W264*	-0.0883126	0.5455025696241078	0.2696929343497243	0.0642325
GRIN2A_79	AACACGAGGCCGTGGATGC	GRIN2A p.V99M	0.11396152345742726	0.3828287304803134	0.26879936861651965	0.0393955
RBM10_25	CTCAACAGGTGAACACCAG	RBM10 p.Q571*	0.0415004	0.814539	0.26866100050809233	0.1283609457244492
NFE2L2_2	TTACTCCAAGATCTATATC	NFE2L2 p.G31R	0.0211163	0.9384007199116344	0.2682883722389287	0.3251519489443987
PTEN_40	CAAACCTTTTTTAGCATCT	PTEN p.X267_splice	0.11725505298849538	0.48247645184677185	0.2681518130697422	0.10774158325630102
PAK5_60	CTCATCGCCGACAAGGTAG	PAK5 p.D517N	-0.0246519	0.8282272529708261	0.2680230450038083	0.0179986
APC_14	GGAAAAACGAGCACAGGTA	APC p.R213*	0.4598034072997958	0.00236348	0.2678584951880237	0.0771852
TP53_319	CGAAGCGCTCACGCCCACG	TP53 p.R337H	0.018992	0.7759238446533344	0.2674151820191911	5.8753225167358945e-5
ROS1_20	CCCAAATCTCTTTTCCTGG	ROS1 p.E1548K	0.23730679205936936	0.00994884	0.26710648597677517	0.00371297
PTEN_9	TAGCGCCTCTGACTGGGAA	PTEN p.R173H	0.3037652650477611	0.00144051	0.2668060014165713	0.00515616
PTPRT_13	CTGTCACGGCTGGAGAAGT	PTPRT p.R112H	0.1784181534393283	0.12375815047403714	0.2665100036531615	0.0214134
GRIN2A_24	GATCATGAAGGCAGCCAGA	GRIN2A p.M653I	-0.0792392	0.5408577033053581	0.2662988366385876	0.0391873
INHA_4	GGACGGGGTGGGTCAGCAG	INHA p.V193I	0.16963096983526027	0.13389663793422943	0.2657972528372833	0.0187692
AKT3_11	TTGGTTCGAGAGAAGGCAA	AKT3 p.R166*	0.40839475609076514	0.0198625	0.26536748153668654	0.1306558844646642
TERT_8	TTCTTCGGCGGGTCTGGCA	TERT p.E280K	0.19865734199051727	0.078573	0.26505180832881015	0.0188829
TP53_93	GCCTCACAACCTCCGTCAT	TP53 p.V173M	0.1652085704414993	0.11883194313765626	0.26452800455266895	0.0124424
SDHD_4	TTCGAAGCAACAGAGCTGA	SDHD p.R22Q	0.0891088	0.6357050875079899	0.264446	0.1591532451445953
ERCC5_1	TCTTTCCTTTAGAATCTGA	ERCC5 p.G1080E	0.22926649037533448	0.18417099388127223	0.2641944701685044	0.12587452819206338
PTEN_25	AGTTACTCCCTGGTGGACA	PTEN p.G165E	0.42853495694437327	1.113513535288772e-4	0.26414972322459984	0.017467
MLH1_9	TAACTTACGGTTGATGAAG	MLH1 p.X263_splice	0.1729927960720667	0.4887273229954715	0.2636274834393369	0.2911278410363043
RAC1_4	GCTCGGCGCTCACACAGCG	RAC1 p.A178V	0.0539696	0.602991	0.26262983145767854	0.0112293
AKT1_7	CTCCCCTACAGACGTGCGG	AKT1 p.E17K	-0.0231634	0.8346147852628725	0.2612708228826744	0.0183131
PAK5_39	GTTCGCAGTACATCTCCAC	PAK5 p.S392L	-0.100161	0.39660076668660016	0.2610511911300071	0.0265357
GATA3_6	GGCGTGGCCCCCCGACAAG	GATA3 p.A146T	-0.032441	0.7330815923888396	0.26060070246554073	0.00605181
GLI1_1	TACTCACGCCTCGAAAACC	GLI1 p.R314C	0.18665611104362984	0.152402	0.26007419688221295	0.0460402
GLI1_25	CATGTTTTCGCAGCGAGCT	GLI1 p.R380Q	0.40599524830283257	0.00413524	0.2596479958079609	0.0670112
KDM6A_4	GCGTCTCTCAGCCTGGAGT	KDM6A p.Q555*	0.10096015758186672	0.32383750354537755	0.25960443970483477	0.0110702
IL7R_4	TAAAGTTCGATCCATCCCT	IL7R p.R206*	0.0200123	0.9047849993204292	0.2595777128246549	0.1200780379536959
CIC_23	CTGGCGCGTCCCTGGGCAG	CIC p.R1277C	0.1025446765995242	0.2851673238978237	0.259175	0.00684824
TP53_231	CGCGCCATGGCCATCTACA	TP53 p.A159V	0.1420166715999118	0.14506027568330757	0.259096	0.00778713
PIK3CG_40	GCTTTCGGGAATATCCATC	PIK3CG p.E263K	0.0244557	0.8742574762562856	0.2587662053234737	0.0933813
EPHA7_19	GAATTTTCCTCTTTAGTCG	EPHA7 p.S225F	0.3898931063059254	0.0200388	0.258752	0.12327868739978748
TSC1_9	TTACCGAGACAGTCTCCCA	TSC1 p.R509*	0.1965203685651903	0.0373703	0.2580424058700236	0.00624384
SPEN_3	ACTAAATCGTTGGGACTCT	SPEN p.R1339C	0.21998216105960092	0.22027766083539949	0.25785769018777704	0.15070475839592895
KMT2D_12	GACGGGCAGGCCCATCAGT	KMT2D p.R5048H	0.10260674865618612	0.451212	0.25680688359657416	0.0591663
MTOR_15	GACGCTCACATTGCTAGAT	MTOR p.V21I	0.0372374	0.7889874382491932	0.25678431996013923	0.0645633
PPP6C_6	AGGAAATCATGAGAGTAGA	PPP6C p.H114Y	-0.0402825	0.8371596479785481	0.2567427512436543	0.18856879435195345
ARAF_10	GATGAGTCGGTAGACCACA	ARAF p.R63Q	-0.0507715	0.7747232032030156	0.2561604969779452	0.14777923711980454
SMARCA4_32	ATGCGGTGGGCTCGGTCCT	SMARCA4 p.R1192H	0.163734	0.1828648753847572	0.2560570800833266	0.0371774
KNSTRN_3	TGCGATTCCCACCCACTTC	KNSTRN p.S24F	0.0571123	0.5248983303939497	0.25602225881689167	0.00428647
PIK3CA_81	TTAAACAGCATGCATTGAA	PIK3CA p.H1065Y	0.3133309264586505	0.0905082	0.256016	0.1669626600974609
MAP2K4_2	GTTCAAAACCCACACATGT	MAP2K4 p.Q69*	0.1546277175842433	0.5012823873668968	0.2559470963082488	0.26541909419448523
PIM1_9	TTTCCGTGATGAAGTCGAA	PIM1 p.E135K	-0.258721	0.17581758571155895	0.2544472509218694	0.1814362450167424
MAP2K4_36	CTACTTTAACTGCCATTAT	MAP2K4 p.X131_splice	0.10292850214998048	0.41763226395528874	0.2538665844370643	0.0452827
AURKB_5	TCTCAGCCCACCCTTGGGT	AURKB p.S322L	0.0393253	0.7319862789439525	0.2538488990353507	0.0268469
PTPRT_96	CGCGGTGACCCGCTGCCAT	PTPRT p.A413V	0.0980759	0.18347770872881144	0.2537738134700074	5.702188895738568e-4
PTPRT_74	ACGCTCCGCTGGGCAGTGT	PTPRT p.R260Q	-0.178853	0.11532236926557694	0.2537310507300598	0.0250462
E2F3_8	GCTCGGTCACTTCTTTTGA	E2F3 p.E265K	0.16638197266449928	0.30552813343329605	0.2536514086107523	0.11811657342689984
ETV6_1	TCCGGATAGTGGATCCCAA	ETV6 p.R369W	0.3964938717304397	0.0176429	0.25297956266833155	0.1305110116328962
NF1_51	TTAAGAGGCGAATGTCCCA	NF1 p.R816*	-0.0295775	0.871338	0.25292313390449095	0.16492054490782967
FBXW7_39	TACAGATCGGACACTCAAA	FBXW7 p.R441W	-0.148544	0.3300233265316042	0.2529025394144728	0.0957782
CSF1R_1	AGACGCCTGCTTCCAGCAC	CSF1R p.V138I	0.14296453413868573	0.0994101	0.2526540962450384	0.00356595
MAP2K4_31	AAACATCCCTTTATTTTGA	MAP2K4 p.P365S	-0.0762554	0.7632657250974006	0.2522212768717285	0.31802125901823325
NFE2L2_15	ATCTTGGAGTAAGTCGAGA	NFE2L2 p.L30F	0.075971	0.6389314770028109	0.25172060571934596	0.1195575843590754
EGFR_43	TGCCGAACGCACCGGAGCC	EGFR p.G724S	0.00189336	0.982653	0.25113998761267253	0.00384275
HLA-A_6	TACCTCATGGAGTGGGAGC	HLA-A p.R30K	-0.176261	0.17850066005650272	0.2506724022992721	0.0547855
IKBKE_9	CCGGATTTCTGCCATTGGG	IKBKE p.X29_splice	0.0178695	0.8614283805058114	0.25021919831863815	0.0142618
GRIN2A_23	TGGATCATGAAGGCAGCCA	GRIN2A p.M653I	0.10004449709444796	0.4208902421353245	0.2501055866112899	0.0439545
CHEK2_13	ATTACCTACCCTGAAAATC	CHEK2 p.X148_splice	0.248821	0.0557742	0.2500228832256372	0.0546528
TP53_298	AGCCGCCTGAGGTCTGGTT	TP53 p.P223L	-0.00198935	0.9843667004673148	0.24946352949757103	0.0137954
APC_20	ACTAAGACGATATGCTGGA	APC p.R499*	0.5279818293342433	0.00692415	0.24945176883886483	0.2026965306748334
STK19_5	GGGTCTTCCGGCGCAGAGC	STK19 p.D89N	0.1673452913014363	0.2054662120967646	0.2490382241172829	0.0594276
PTEN_8	CACCAGTTCGTCCCTTTCC	PTEN p.R130Q	0.10748903356241092	0.29062723934727613	0.24899036503610256	0.0142878
GATA3_19	CATTTTTCGGTTTCTGGTC	GATA3 p.R366Q	0.00916883	0.9505988186035652	0.24897739090825463	0.0918166
XIAP_3	GATTCACTTCGAATATTAA	XIAP p.R238Q	0.5666747947794114	0.10135143299811566	0.24886858705268197	0.4731219174965831
JAK3_9	GCTCGGGAGGGGGCTGATG	JAK3 p.R657W	0.14438216359766257	0.16999554302121964	0.24858458940961572	0.0180363
FOXP1_13	TATGACGCACTGCATTCTG	FOXP1 p.R514H	0.12426677150332636	0.39554735958691345	0.24809008003084848	0.0896443
H3F3C_11	TGGCGCTTCGAGAGATTCG	H3F3C p.A47V	-0.14923	0.3630158824547002	0.24803605619673763	0.1294901826990145
RRAS2_1	CCGCCCCCGCCGACCACCA	RRAS2 p.G23D	-0.0212459	0.7595645668565347	0.2480074169189561	3.437434502140922e-4
ATM_16	GACACGTTCAGCTACTTTG	ATM p.R3008H	-0.0272786	0.8433091990865336	0.2473426078349184	0.0724688
RRAS2_7	TGCTGTATCCAAAACTAAA	RRAS2 p.A70T	0.11651838313179212	0.6151832079692834	0.2472119708388729	0.2856202490937696
PDGFRA_13	ATTCCTCGGGCAACTTGAT	PDGFRA p.R804Q	0.22491085950726009	0.0580535	0.24692402605048777	0.0374513
KDM5C_7	GCGTCTACGAAAGGCCCTG	KDM5C p.R681*	0.2310529776894119	0.12092894103328596	0.24655948674068032	0.0979478
MGA_19	GGCGGCGTGGTGAAATGAG	MGA p.R2435W	0.00297257	0.981423	0.24628460338642505	0.0532326
EGFR_51	GCCCGGCAGGAGTCATGGG	EGFR p.P596L	0.24753876006663175	0.0277784	0.24628164318149087	0.0286121
SMARCA4_49	CTCAGCACCCGGGCTGGGG	SMARCA4 p.R1157W	0.0909018	0.36477337284132777	0.2458857185218473	0.0140979
H3F3C_14	AGAGATTCGTCGTTATCAG	H3F3C p.R52C	0.472208	0.0250744	0.24587809424109747	0.24435501641171864
ATM_21	CTTCGTGTTCATATGTTCG	ATM p.E2039K	0.2415206098382034	0.1995388167079308	0.24485886630280024	0.19348110279801453
INSR_2	AACACTTCCTCGACCAGCG	INSR p.S784F	0.0926149	0.44947257965507526	0.2438266294985159	0.046324
PTEN_60	GGAAATCCCATAGCAATAA	PTEN p.G36R	0.19635862801849455	0.376813	0.24372287773727183	0.2725741425503515
TP53_35	CACTTTTCGACATAGTGTG	TP53 p.R213*	0.0578327	0.7111652943893486	0.24334354761709667	0.11859415669752069
PPARG_1	GATTGTCACGGAACACGTG	PPARG p.T475M	0.00160939	0.991961	0.2432890846375536	0.12715026360659898
MLH1_4	CTTACGGTTGATGAAGAGT	MLH1 p.X263_splice	0.0475333	0.7290619088255321	0.2428661325169912	0.0761049
PTPRD_40	TGCTTTATTCTTTCTAACA	PTPRD p.R1572K	0.3416352883742355	0.2058533708356924	0.24282406765503783	0.36898353293861214
KRAS_6	TGCTGTGTCGAGAATATCC	KRAS p.A59T	0.10882796360586086	0.4486588095180178	0.2424822248732624	0.0910097
APC_50	AATCAAAGTACAACTTATC	APC p.Q1071*	-0.0970299	0.6252066619268457	0.2422825687839753	0.2212455414515222
GRIN2A_1	TTTTAAATTCCTGCAGCAA	GRIN2A p.S1447F	0.25394585438812306	0.0683997	0.2421029118688063	0.0824301
PPP2R1A_13	GACTCGGTGCGGCTGCTGG	PPP2R1A p.S219L	-0.302314	0.00114964	0.2414166442914456	0.00921466
FBXW7_47	TTCTCGAGATGCCACTCTT	FBXW7 p.R479*	0.0119682	0.8969130896302644	0.24135458856430111	0.00880096
FGFR2_7	TTCATCGAGATTTAGCAGC	FGFR2 p.R625*	0.4702779435528941	0.0151976	0.241303	0.2143332345490265
CREBBP_34	TGTCGGAGCTTCTACGAGG	CREBBP p.S71L	0.1692103889150184	0.20476323631787685	0.2408287466095607	0.0709989
NOTCH3_14	CCCGGGCCCGTCGGGAGCT	NOTCH3 p.R1570C	0.18542132070261905	0.0545786	0.2405241945187192	0.012636
CDKN2A_77	GGGCTTCCTGGACACGCTG	CDKN2A p.P146S	-0.20899	0.0815273	0.24035931270382696	0.0442042
NTRK2_5	AGTTTGTTTCGGGTAAAAT	NTRK2 p.R124Q	0.11829863729220604	0.592539	0.24033588942373793	0.27663355604462764
MAP2K2_4	GCACGCGCTCCTACATGGC	MAP2K2 p.R231C	-0.0418047	0.6798846780454838	0.23995247273141937	0.0175988
GRIN2A_102	ACACGCCCGTGAAACAGAA	GRIN2A p.V852M	0.1246285105558648	0.36977757680154033	0.23994858411799977	0.0839291
AXL_4	CACGGAGCTGGAGGTGGCT	AXL p.T239M	0.2079516860954361	0.0476917	0.23976601424628227	0.0224153
PIK3CA_21	TTCTAATCCATGAGGTACT	PIK3CA p.E453K	0.1132507016583962	0.47174683234451176	0.23964235085418611	0.12735782208957916
GNAQ_7	AATTAGTTCGAGAAGTTGA	GNAQ p.R114*	-0.28686	0.1533576389631679	0.2395963651404292	0.23080914668862604
JAK3_13	CTGGCTCGGGAGGGGGCTG	JAK3 p.R657W	0.1954504900052015	0.0379376	0.23953267125519445	0.0109516
NTRK3_25	CCATTCGCTGGATGCCTCC	NTRK3 p.R735C	0.1847917637735602	0.0268776	0.2393629012229459	0.00413539
INHBA_10	CTTCCTCGGCCTCTTCCCC	INHBA p.E194K	-0.0423457	0.5704422076215943	0.23933032516817715	0.00130715
SMAD4_25	AAATATTGTCAGTATGCGT	SMAD4 p.Q116*	-0.0567279	0.7763954583573733	0.23923383312017996	0.2296870625195798
FLT4_9	CGAAATCGCTGGATGCCGT	FLT4 p.R318Q	0.1939189615364932	0.0148443	0.2391341448684637	0.00265673
CREBBP_37	GTCGGAGCTTCTACGAGGA	CREBBP p.S71L	0.0949715	0.49890095116289457	0.23875000281919123	0.088869
NF1_48	AGAGGCGAATGTCCCATGT	NF1 p.R816*	0.066239	0.5060727654678888	0.2386484829081792	0.0164061
SMARCA4_59	CCCATTTAACCAGAACCAG	SMARCA4 p.P171L	0.1056250580298913	0.5163693693529199	0.23858295316274328	0.142257
ATM_5	TTCGAGTGTGTGAATTAGG	ATM p.R250*	0.1882594864316496	0.3787029038836418	0.23835464568004772	0.2649105075252951
ALK_18	TTCCCCGGGTTTCAGCTCC	ALK p.E668K	0.0815627	0.4684333939531807	0.23802792635621817	0.034214
PPARG_2	ATTGTCACGGAACACGTGC	PPARG p.T475M	0.0662311	0.6288647484368148	0.2379418214122973	0.0821707
SMARCA4_8	CTGCTGACGGGCACACCGC	SMARCA4 p.T910M	-0.0190633	0.8082171364662695	0.2370574495753426	0.0024848
MTOR_14	AGGACGCTCACATTGCTAG	MTOR p.V21I	0.0912065	0.4332436730730273	0.23693920804783933	0.0415505
NF1_81	GTAGAAATGCGACTAAAGA	NF1 p.R156H	0.41715671523431114	0.0242984	0.2368383850254043	0.20190805652748064
TP63_48	TACTGCTTAGAGTTGGGGC	TP63 p.X193_splice	0.24683416298554295	0.14808112325604264	0.2364343324927516	0.16602197986199088
PDGFRB_1	TTCGGGGTGCCCTGCGCCT	PDGFRB p.S1092L	0.0855148	0.22652291979470737	0.23637019479229648	8.178333460892872e-4
INSR_1	CCAACACTTCCTCGACCAG	INSR p.S784F	0.1287623773616495	0.2444903413779073	0.2363371019645819	0.0325518
MAP2K4_1	AGTTCAAAACCCACACATG	MAP2K4 p.Q69*	0.18678830851688832	0.2952592185519724	0.2360031439499888	0.1859464320356565
GRIN2A_90	GCTATCTTCGGTCGTCCTT	GRIN2A p.R1402W	0.17864567206652215	0.11410407015787268	0.23597054908330128	0.0368165
PTPRS_38	CCAGCCGCGTCATCATGAC	PTPRS p.R1492Q	0.0249709	0.8094886295018686	0.23596854339746545	0.0225134
SDHD_5	ACTGGAGTTCGAAGCAACA	SDHD p.R22Q	0.0351089	0.8237809934423581	0.23571427739802395	0.1341345100946346
AMER1_30	GTCGAAGCTCTGAGATGTT	AMER1 p.R531*	-0.0668541	0.6623588062981417	0.235688	0.12239120734607144
TP53_115	CACCACACTATGTCGAAAA	TP53 p.V216M	0.26857061203313104	0.1915049201573912	0.23557318336988944	0.25216385661338947
MSH2_6	CATATATTCGACAAACTGG	MSH2 p.R680*	-0.00640098	0.9683302096318824	0.23528962960347796	0.1433878595065166
GRIN2A_100	CACACGCCCGTGAAACAGA	GRIN2A p.V852M	0.25427034950942456	0.0234865	0.2345436871515653	0.0367289
PPM1D_1	ATAGCTCGAGAGAATGTCC	PPM1D p.R458*	0.15969845116567702	0.2854562760945259	0.2344547480481066	0.11672674938294456
PIK3R1_7	AAAAAGTCGAGAATATGAT	PIK3R1 p.R461*	0.10439291431510254	0.6929310673240618	0.2344201396835967	0.37478897308380976
NTRK3_29	CCACCAACGCTGCACTGGC	NTRK3 p.T332M	0.1160630595277438	0.237472	0.23376264396706617	0.0172856
TP53_70	CACGGTCAGTTGCCCTGAG	TP53 p.T125M	0.12417898277927822	0.0973752	0.23356383390659735	0.00180357
TP53_312	CTGCCCTGGTAGGTTTTCT	TP53 p.G105D	-0.0409544	0.6651173502449269	0.2335535934594084	0.0132965
RB1_124	TTGGAGTTCGCTTGTATTA	RB1 p.R451C	0.14665583148808184	0.4218479618761825	0.23321465506506348	0.20115749174894543
RNF43_17	CAGCCGCTGGGGCTGACCT	RNF43 p.P154L	0.0700403	0.4676778788050216	0.2332058117125794	0.0154955
ARID2_14	TTTCCTTTGAGGAGGGCAA	ARID2 p.S297F	0.0775803	0.5590029159637295	0.23310533859843108	0.0787968
BCL2L11_6	GAGTTGCGGCGTATTGGAG	BCL2L11 p.R153W	0.17605870953420383	0.17227631958315398	0.2323981930894895	0.07148
MAPK1_11	TTTAACCCTCTGAGGATCT	MAPK1 p.R135K	0.12792758616461652	0.2885726135878116	0.2322140347595377	0.053807
PTPRT_31	CACCATCATGAAAGATCCT	PTPRT p.M76I	0.34326723041199514	0.0481936	0.2320909576613452	0.18216158446683453
FAT1_35	TGACGGTAACATCCACAAT	FAT1 p.V2908I	0.1135938704690266	0.2878730597857348	0.23197401031293455	0.0298026
NF2_27	CCTCGCTCGAGAGAAGCAG	NF2 p.R341*	9.81429345597799e-4	0.991834	0.23189505518709616	0.0153637
MITF_3	GAACGGGTTCTTGCTTGAT	MITF p.E419K	0.3640133371362158	0.0027678	0.2317201451026381	0.0571878
CIC_20	GACTGGCGCGTCCCTGGGC	CIC p.R1277C	0.19953639279066265	0.0166415	0.23164565591695824	0.00543277
NF1_70	TTCTTCATCAATTCCAGGC	NF1 p.E2748K	-0.00927708	0.9539117552487456	0.2315515443844927	0.14805085701185208
ATM_8	ATGCAAACGAAATCTCAGG	ATM p.R2993*	0.30619838085212575	0.1012606026711136	0.23118392604314963	0.21631674272639864
TSC1_23	CACACCCTAAAATGGAAGA	TSC1 p.X305_splice	-0.0866977	0.6690411317071296	0.231094	0.2533881560259077
GRIN2A_32	CCCCTTGCGGAAGTTTTCA	GRIN2A p.R1159H	0.00869397	0.9434012170588608	0.2309103791605329	0.0588792
APC_83	TAGTCCCCCTAATTTAAAA	APC p.X470_splice	-0.26566	0.14481020882908976	0.2305255892604177	0.20280380012169016
ASXL2_7	GAATTCGACAAGAGATTGA	ASXL2 p.R357*	0.13086192551944936	0.4738833093645044	0.230364	0.20718747626024633
MDM4_2	CATTTCGGCTCCTGTCGTT	MDM4 p.S367L	0.0500341	0.7348961718941427	0.23020313367846715	0.11889226992301807
SPEN_14	CCAAGATCGTACATATTAT	SPEN p.R630C	0.0773581	0.6428848222788037	0.23012149072703017	0.1670108217135977
ERBB4_6	CGCTGATTTCCTTCAGGGA	ERBB4 p.E452K	0.15649162474466646	0.24950756755951625	0.2299368511370053	0.0905009
RAD52_1	GTTCGAGTCTCCACGCCGT	RAD52 p.R278*	0.0388541	0.6862687082781669	0.2297848216503956	0.0167369
IKZF1_16	GCTCATCGCCCTCATCTGG	IKZF1 p.E29K	-0.0213968	0.8142373163437752	0.22920687206433257	0.0115882
CDKN2A_7	GGCAGCGTCGTGCACGGGT	CDKN2A p.D84N	0.13676546551609522	0.2281064154991278	0.22915069778864372	0.0432948
RB1_105	TATTCAAAAGAAAAAGGAA	RB1 p.Q93*	0.18985309058943764	0.43418489043049985	0.2286826328509645	0.3461103621908229
PPP2R1A_25	AGTCATGCGGTGCAGGTAG	PPP2R1A p.R498H	-0.111614	0.4392650090461401	0.22833712698681224	0.11215987720399433
FBXW7_38	CAGATCGGACACTCAAAGT	FBXW7 p.R441W	0.15997417769529712	0.39294506495640213	0.2282183138468992	0.22273006544682183
PIK3CA_76	AAAATCTTTCTCCTGCTCA	PIK3CA p.D549N	0.16484604841769368	0.14151279611373196	0.22754137036402233	0.0423297
CDKN2A_36	CTGCCCGGGAGGGCTTCCT	CDKN2A p.R87W	0.2197042057097346	0.0140027	0.2274707550069178	0.0109651
HGF_4	TTCGTAGCGTACCTCTGGA	HGF p.E199K	0.0109123	0.9427891352749572	0.2273780390908508	0.13439854378447155
GATA1_6	CTCCGCCACAGTGGAGTGG	GATA1 p.R216Q	0.12431256888400512	0.26310056225451123	0.22735199887058585	0.0405319
PTEN_18	AGTTCCCTCAGCCGTTACC	PTEN p.Q245*	0.13510618019254655	0.204003	0.22705915506385005	0.0326924
ERBB4_3	TGATTTCCTTCAGGGACTG	ERBB4 p.E452K	0.24142105926238175	0.0332104	0.22682768139377751	0.0455067
IKZF1_15	GGCTCATCGCCCTCATCTG	IKZF1 p.E29K	-0.00202037	0.9860950143225764	0.2262673619595578	0.050605
KEAP1_13	ATCGTCTCCTTTATGCCGT	KEAP1 p.R470C	0.0677065	0.5784456022259965	0.22560759327183896	0.0636886
JAK3_11	TCCTGGCTCGGGAGGGGGC	JAK3 p.R657W	0.0822381	0.5247597370387562	0.22560627914494313	0.0807324
ATRX_10	TGAGCGAGAAAAATTGAGA	ATRX p.R1514*	0.2803464152142844	0.14819082921764162	0.22554440564041467	0.24505483120648527
PIK3CA_1	CCTGCTCAGTGATTTCAGA	PIK3CA p.E545K	0.12842607621952978	0.30226966747446626	0.2249563726548516	0.0705293
PIK3C2G_15	ATCTTCGTCCACAAGACAC	PIK3C2G p.R1142C	-0.131478	0.2871481629515901	0.2246533389190972	0.0680017
TP53_13	GTACTCCCCTGCCCTCAAC	TP53 p.S127F	0.12055800425390534	0.17443718682461493	0.2246518233120312	0.0113102
MTOR_23	ATCTCTTCGGAAAAACCTC	MTOR p.S2215F	-0.00715688	0.9648659494710858	0.22431497521219043	0.16681781830346973
TGFBR2_3	GGCCCGTCTCACAGCCCAG	TGFBR2 p.R553C	0.0420053	0.6667402328032679	0.2242094045426467	0.0213206
E2F3_9	CTCGGTCACTTCTTTTGAC	E2F3 p.E265K	0.2842430229726124	0.0463494	0.2239730996605814	0.11674279870541104
PTPN11_23	AGAAATTTGCCACTTTGGC	PTPN11 p.A72V	0.1490184109459219	0.215446	0.2238840106623761	0.0626197
BLM_5	TTTCGTAAGTGTTTTGACT	BLM p.S33L	-0.3338	0.0805438	0.22387098635126457	0.23801216407267664
ZFHX3_21	CGCGGTGCTCTCCGCGAGG	ZFHX3 p.A66T	0.0695912	0.4184800226640793	0.2235446003058272	0.009283
NF1_7	ACTTCGAAGTGTGTGCCAC	NF1 p.R1362*	0.2728505386873603	0.0812786	0.2233307076294719	0.15389626118726352
H3F3A_4	TTCACCCCTCCAGTAGAGG	H3F3A p.G35R	-0.080731	0.646508	0.2230170964198483	0.20413239167248468
CARD11_38	GAGACGGGGGCTGACCCGG	CARD11 p.R888H	0.0838077	0.2899604812154572	0.22292531220267447	0.00482361
FGF3_3	CACGCGGGGCAGGAACAGG	FGF3 p.R181H	0.189488	0.15839499420032022	0.222822	0.0971656
CARD11_7	TGCGGCGCCTCTCCAAGGA	CARD11 p.R436W	0.10140423317042184	0.183786	0.2226267361115948	0.00348701
PIK3CG_15	CAAGGGCGCTATCATGGTA	PIK3CG p.A676T	0.1262004415155607	0.3258765070521205	0.22259288681484712	0.0829737
RB1_108	ATCAACCTTCAGAAAATCT	RB1 p.Q395*	0.5530904889067939	0.00284019	0.2221081103309785	0.2318025930019404
TSHR_2	GACATCTTCCATGTTGTGG	TSHR p.E736K	0.1313633340419206	0.378325	0.2217459863353712	0.1367395050610853
CDH1_27	CCGCCCCATCAGGTATGTT	CDH1 p.Q129*	0.105373	0.33309165989924683	0.221736	0.0415393
SYK_5	GACAGGGCGAAGCCACCCA	SYK p.A52T	0.15407285828127723	0.0685962	0.2216867521271351	0.00875923
IL7R_1	CTCGATGAAATATATCTCT	IL7R p.E95K	-0.250523	0.2726010418161709	0.2216170808008463	0.32976403923987874
APC_100	CAAACAGCTCAAACCAAGC	APC p.Q1447*	-0.0741441	0.5039593269340126	0.2214578113638697	0.0453303
FBXW7_36	ATCGGACACTCAAAGTGTG	FBXW7 p.R441W	0.16654163346952017	0.35334936365412756	0.22134152275159596	0.2172782237963544
CDH1_32	TGCAAATTCCTGCCATTCT	CDH1 p.Q706*	0.00138596	0.990821	0.22120954019374697	0.0657797
PRDM14_1	TTTAGGCTGGAAGATTGAG	PRDM14 p.S475N	0.0435893	0.7764001397658217	0.22094610003884024	0.14930349802403883
FBXW7_2	GTGCGTTGTATGCATCTTC	FBXW7 p.R465C	0.0691179	0.6302192943090938	0.22083753738452144	0.12349956586420324
TET1_1	AAATTCATGCGTGCTGCTC	TET1 p.R81H	0.013703	0.9030648735051112	0.22075097240390051	0.0494041
SMAD4_58	GAACGAGTTGTATCACCTG	SMAD4 p.R135*	0.0112372	0.9414285782484534	0.22073749680442672	0.1480542045871498
PAK5_50	TCTCCCTGTACTTTTCGGT	PAK5 p.E148K	0.1946436927186372	0.0728447	0.22065820981438952	0.041988
ATM_49	TGTCTGTGAAGAAACAAAC	ATM p.X221_splice	0.32470624257859726	0.0775467	0.2204326024352414	0.23135164791856197
AURKA_3	TATCACGGGTAAGACGCAA	AURKA p.R343W	0.00762123	0.9521481149363616	0.2204197880397951	0.0819653
PIK3CG_27	TGACGTCATAGCCAATCAG	PIK3CG p.V162I	0.28999668629498293	0.0822013	0.22037961455586003	0.18686120947868223
PIK3CD_18	GGATGTTGGCGATGGTGTC	PIK3CD p.A835T	0.24282218012267348	0.0526825	0.2203347641563251	0.0788834
PTPN11_2	CAAATTTCTCCCCTCCATA	PTPN11 p.E69K	0.6583234814140068	1.387503943248497e-4	0.2201161922265087	0.20377966794901475
NF2_16	TTCCACTCTGCCGGCAAGA	NF2 p.X525_splice	0.0404843	0.6714629695163696	0.2200884684170707	0.0209925
ERG_3	GCCGCCTTGCAAATCCAGG	ERG p.R302C	0.1893704464715642	0.16304911252952006	0.21994203143704827	0.10518416038107874
NF1_28	CCCCGAGCCAGGAAATCCA	NF1 p.R2517*	0.0567048	0.6043558094376483	0.2197986217960895	0.0442574
SMARCA4_2	GAGCTCGGGAAGCTTGTTC	SMARCA4 p.E920K	0.0567847	0.603169	0.21967890222737585	0.0440397
RECQL4_3	AGGGCTCCTCGTTCCATCT	RECQL4 p.E266K	0.0393325	0.6940303478176735	0.21948807751051205	0.0278644
STAG2_14	TTCGACATACAAGCACCCT	STAG2 p.R216*	-0.199414	0.15920255437388908	0.21940043819659852	0.11959147454932896
ARID1A_67	GCTCAGCAAGGCACCATGT	ARID1A p.Q1493*	0.24599210680797767	0.0893018	0.21937921727853116	0.12985474396389388
CTNNB1_7	GGACTCTGGAATCCATTCT	CTNNB1 p.S33F	0.0549852	0.7332448444095265	0.21903362755016603	0.17407949496462358
GRIN2A_41	AAATTCCTCTTGGATCATG	GRIN2A p.E657K	-0.0712504	0.6493142099915203	0.2190087349409207	0.16109857069898503
GATA3_23	ACATTTTTCGGTTTCTGGT	GATA3 p.R366Q	0.366895	0.0101679	0.21898264458936856	0.12584086334853067
DIS3_9	TTCGAAGCAGAGCATGTTC	DIS3 p.R689Q	0.0519386	0.7719949826607838	0.21889553866276143	0.22124182511894164
TCF7L2_20	TCCGCGCGGGATAACTATG	TCF7L2 p.R420W	0.0544291	0.6558710091834543	0.21863251835685563	0.0729509
ARID1A_21	TTGGCCGAGACCGTGTCTC	ARID1A p.R1461*	0.28981288066118155	0.00538531	0.21857098737939873	0.0359465
ERBB4_28	ATTCCAACGCGAGAAATCC	ERBB4 p.T926M	0.0635028	0.611063	0.2185403765219955	0.0795432
DAXX_6	TAGGGGATGCGCTGCTCTA	DAXX p.R256H	0.0197252	0.8462630138712006	0.2185376046009662	0.0313926
TP53_175	GGCCAGGAGGGGGCTGGTG	TP53 p.W91*	0.27597957968920384	0.0517395	0.21831468940539167	0.1240763782220705
FGFR4_3	GCACTCCACGATCACGTAC	FGFR4 p.V550M	-0.0399588	0.7558572707629876	0.21801655721669275	0.0890616
DDR2_11	ACCCAGGGGCGCCATGCAG	DDR2 p.R105C	0.040235390284421003	0.6747630290681534	0.21738630215432295	0.0231434
APC_33	CGTTCAGAGTGAACCATGC	APC p.Q1406*	0.0847934	0.5422748365512629	0.2173340993434577	0.11792160142225586
TP53_324	TGAGCAGCGCTCATGGTGG	TP53 p.R181H	0.0774973	0.6089738695418856	0.21691882379663785	0.1518956118727966
ARID5B_4	TCATGTCCCCACTGGCCAA	ARID5B p.S688F	0.0461107	0.6041550171980761	0.21649856238980453	0.0148297
HNF1A_5	TACAGGGCGGCCCGCTTCT	HNF1A p.A161T	0.119663	0.16421267996302488	0.21646879105704672	0.0118188
CDKN2A_28	AGGCATCGCGCACGTCCAG	CDKN2A p.D108N	0.0837759	0.5505931301732475	0.21629273026532625	0.123129
EPHA3_31	TCGGACTTTCGCGTGTCCT	EPHA3 p.S768L	0.0222107	0.7988402489251297	0.21605336409025613	0.0129734
ARID1A_81	CAGCAACGGTGAGTAAAGC	ARID1A p.R1335*	0.16308055913050362	0.2303743208727105	0.21544700372136943	0.11299096561197296
RHOA_10	AATGGCTACGAGAGCTGCT	RHOA p.T175M	0.0481861	0.6635065311624564	0.21517379962402125	0.0518616
PDGFRA_18	TCCATTCCTCGGGCAACTT	PDGFRA p.R804Q	0.0309356	0.7750695759886409	0.2151408712276513	0.0465404
TP53_66	CTTGCACGGTCAGTTGCCC	TP53 p.T125M	0.1433780160304688	0.0765576	0.21505931641617343	0.00786891
FOXA1_8	GTCATTGAAGGACAGCGAG	FOXA1 p.D226N	0.0680552	0.6719389834413056	0.21504870876547943	0.1804080243162381
KDM5A_6	TGCCTGGCTCTGGGGAAGT	KDM5A p.G208D	0.0572714	0.6357604353563506	0.2149669147233385	0.0751621
GLI1_3	TCACGCCTCGAAAACCTGA	GLI1 p.R314C	0.14107394990829653	0.3004897563827156	0.21470914666859145	0.11490235548754715
RPTOR_4	TGACGGGCTGGGCAAAATA	RPTOR p.V971I	0.3138478567076168	0.0109875	0.21457920782309856	0.0824505
ATM_44	GAAGTAACGGAAAACTGGT	ATM p.R2832H	0.36537300247161386	0.00855143	0.2145607365526516	0.123244
ARID1A_53	CGGAGGTCAAATGCATGGA	ARID1A p.Q840*	-0.0924862	0.4749185520487477	0.2142230145666196	0.0967867
ARID1A_62	GTATCAACAGCAACAGCAG	ARID1A p.Q1363*	0.0433233	0.7800132368875214	0.2141878127697499	0.16666550829599333
PIK3CG_21	TGCGCGGCTTCATCCTCCG	PIK3CG p.R26H	0.189168	0.0175279	0.21407322915855717	0.0071821
NTRK3_7	TCCCTGACGGAAGTACTGG	NTRK3 p.R518H	0.19318610476388473	0.0898035	0.2140675499253884	0.0601269
NOTCH1_27	GCTCGCAGGGGTTGGCACC	NOTCH1 p.E424K	0.00580128	0.9589446358614202	0.21369927638875189	0.0576072
HIST1H3B_2	ATTTCTCGCACCAGGCGCT	HIST1H3B p.E74K	0.1589431205577768	0.12565105232411097	0.21341743719662937	0.0396877
TSC1_8	TTTACCGAGACAGTCTCCC	TSC1 p.R509*	0.0525496	0.6803499152678707	0.2134071715304896	0.0940081
ATR_1	TTTCGCCTGACTCATAATA	ATR p.R2514C	0.2060611516296585	0.13543827019265323	0.2132546956454119	0.12236227700064777
TP53_213	AGTCTTCCAGTGTGATGAT	TP53 p.E258K	0.0524612	0.7517922149135798	0.21323058483713664	0.19789255206604964
TCF7L2_31	AGTGCGTTCGCTACATACA	TCF7L2 p.R471C	0.0534144	0.8215402258838902	0.213162	0.36769893483904786
GRIN2A_69	TGATGAATTCCCTGTAGCC	GRIN2A p.E182K	0.1416818944285549	0.3612199554310048	0.21299314060272223	0.16973634514376898
PIK3CG_24	TTGGAGGCGATCATAGCCA	PIK3CG p.A557V	0.0658074	0.63296740571622645	0.2125559349447484	0.12233507374296287
PTPRD_7	GAAACGGGAGAGAATGTCA	PTPRD p.T1637M	-0.19194	0.2551576258432173	0.21221426642088093	0.20684004234997944
SMARCA4_47	GCACCCGGGCTGGGGGGCT	SMARCA4 p.R1157W	0.0790008	0.5080501115510436	0.21212614360526055	0.0753583
FBXW7_33	GATCGGACACTCAAAGTGT	FBXW7 p.R441W	-0.0307944	0.8577681150688247	0.21191934238993115	0.2162765429018023
MLH1_6	TTTAACTTACGGTTGATGA	MLH1 p.X263_splice	0.27102807179253546	0.22697576248634072	0.21159775495953848	0.3459622735392424
EPHA5_37	AAAATTCCAATCAGATGGA	EPHA5 p.P841S	0.0982245	0.6071803754076424	0.21155386962246275	0.2676263432873393
IKZF1_19	AACCTGCTCCGGCACATCA	IKZF1 p.R162W	-0.0776592	0.5137548635930553	0.21136044733020165	0.0750947
NF1_40	TACCACTAAAATGAAGCTG	NF1 p.X2143_splice	0.1785812397468118	0.5017985433394518	0.21135725942464817	0.4266035123014934
GATA3_22	TTTTCGGTTTCTGGTCTGG	GATA3 p.R366Q	0.1681848791430458	0.3113633443058245	0.210823	0.20438963830589008
SMAD2_7	GACATGCTTGAGCAACGCA	SMAD2 p.S465N	0.00447454	0.9696472167635298	0.21079612054671631	0.0723733
INPP4A_9	TTTCCGTAAGTCCCTTCGG	INPP4A p.G973R	0.12328308825163271	0.23332488978167715	0.21056027898468468	0.0416619
TP53_141	AGATGGCCATGGCGCGGAC	TP53 p.A161T	-0.0368749	0.7042949434301686	0.2105436970548166	0.0299751
RB1_72	TACCGAGTAATGGAATCCA	RB1 p.R455*	-0.0184286	0.8931592485639672	0.21039754222342472	0.12410320683745278
FBXW7_29	TATTACCTTGTATATTCTG	FBXW7 p.X195_splice	0.22272842546402263	0.3882596411261035	0.21031147377014683	0.4154149845744908
TSC2_5	TGGTCTTCGAGTTGGCGCC	TSC2 p.R1138*	0.0761316	0.4994522300858826	0.20917555267220364	0.0632703
RNF43_10	AGTCTACCTTGCTAGCCAG	RNF43 p.X125_splice	0.17122178401777077	0.18324333151336644	0.20893802340621623	0.10434311591214608
SMARCB1_16	TGAGGCGTCTTGCCAACAC	SMARCB1 p.R377C	0.0683178	0.3625893009479126	0.2088725327930927	0.00531475
MSI1_4	CTTCGTTCGAGTCACCATC	MSI1 p.R107Q	0.0376596	0.7993877529713629	0.20873900374416848	0.1585802576980189
RB1_28	TTTGTAGCGATACAAACTT	RB1 p.R445*	-0.0202609	0.9146190029767686	0.20814619284945535	0.26964753483788073
HGF_3	ACTTCGTAGCGTACCTCTG	HGF p.E199K	0.13889929829512526	0.21063490822042727	0.20799307137781808	0.0607111
KDM6A_6	CACGAAATATCAAGGTCTC	KDM6A p.R1279*	0.11134263527774602	0.49365755932822486	0.20798706413607368	0.20067525162226055
CREBBP_4	AGACCGAGTGAACAAATTT	CREBBP p.R1341*	0.0269207	0.8691523588063359	0.20795780353638313	0.2023525198848135
ERRFI1_1	TTACTTCGAGCACCTATAG	ERRFI1 p.S307L	-0.000413768	0.9983105449012856	0.20766795806325697	0.28676713800980347
PTPRD_41	GCTTTATTCTTTCTAACAT	PTPRD p.R1572K	0.144971	0.3494841335379223	0.20761537247482603	0.1800635187667591
TP63_38	AGTCGAGCACCGCCAAGTC	TP63 p.S184L	0.10844369233023272	0.24249658489624937	0.2070045081919744	0.0255846
CDH1_18	ACCGAGAGGTCAGGGGTCA	CDH1 p.R335*	0.1149738857517094	0.3110902423678172	0.20694844801880372	0.0681118
IDH2_6	GGCGTGCCTGCCAATGGTG	IDH2 p.R172K	0.0712683	0.4581294687315742	0.2068654464226802	0.0310878
STK11_1	CATACTTACTTCTTCACGT	STK11 p.X97_splice	0.25057069441901875	0.1658353917876092	0.2064756241473079	0.2537968973270659
HNF1A_10	TGTGCGCTATGGACAGCCT	HNF1A p.R321C	0.0976013	0.3940770421881115	0.2062638698944586	0.0714711
HIST1H3I_1	CAGATCGGTCTTAAAGTCC	HIST1H3I p.D82N	0.12563336003273357	0.20172998219357988	0.20622644289055467	0.0359951
FGFR2_8	TCATCGAGATTTAGCAGCC	FGFR2 p.R625*	0.26336822756145695	0.0913317	0.20618286391971408	0.1866393348184593
CDKN2A_97	GGCCGGGGCGCGGCTGGAC	CDKN2A p.A102V	0.1363348355526171	0.0686049	0.20606832587903956	0.00589451
TP63_22	GGATCTTCGTTTCTTGATG	TP63 p.R393Q	-0.0303913	0.8765210586762106	0.20521922984053512	0.29302403476558725
KMT2D_43	AGCGGCGAGGGCGCAAGAA	KMT2D p.R1757*	-0.0393286	0.6660895645160165	0.20490772057036935	0.0243081
MAP2K2_7	CACGCGCTCCTACATGGCT	MAP2K2 p.R231C	-0.0894843	0.3150897528257285	0.2048429034960707	0.0210904
RB1_57	AATTACCTACCTCCTGAAC	RB1 p.X737_splice	0.0591007	0.719758	0.20462600805127343	0.21375021517960577
TCF7L2_6	CTTGGTGACGAGCGACAGC	TCF7L2 p.V597I	0.0987181	0.30021361722535334	0.20457130898502376	0.0316761
ROS1_7	TATTTCCACCAGACAGTCT	ROS1 p.G1628E	-0.0208424	0.853805	0.20439916943108236	0.070015
RAC1_3	AAGCGATCCGAGCAGTCCT	RAC1 p.A191V	0.1518713385875291	0.1196791269970163	0.2043332492403241	0.0362404
INPP4B_4	ATTCGAGAGCAGATGTCAG	INPP4B p.R252*	0.00915887	0.9515642797791956	0.20390309735083623	0.17562841498995063
SMAD4_43	ACGTGGACCCTTCTGGAGG	SMAD4 p.P356L	0.1375767741309467	0.27061473979238126	0.2038752838613302	0.10245016807386924
EIF1AX_10	CGCCATGCCCAAGAATAAA	EIF1AX p.P2L	0.0799807	0.5754956568454526	0.20382551865811296	0.1531715137056837
RNF43_7	TGGGCATGGCCGGGATGCT	RNF43 p.G347D	0.0477149	0.6241012344276009	0.20365129517309452	0.0361579
INHBA_6	GGCCTCTTCCCCTGTGTCC	INHBA p.E190K	0.12116156938244728	0.23440165375433417	0.20312701085179477	0.0460559
CHEK2_12	ACCTACCCTGAAAATCCGA	CHEK2 p.X148_splice	0.0668615	0.5945119238863312	0.20299229598146495	0.10557117853829942
CBL_8	ATCGGCAGAAAGGACAGCC	CBL p.R420Q	0.1506713450111812	0.20685213012921905	0.20286197782053608	0.0891218
APC_77	GGAAAAGTTCGATCTAATT	APC p.R2204*	0.093089	0.704532	0.2026511971036479	0.40874791883660183
PTPRD_8	AAACGGGAGAGAATGTCAC	PTPRD p.T1637M	0.0926558	0.5320397938058017	0.20256836270726944	0.17141092141722708
GRIN2A_72	TGAATTCCCTGTAGCCAGG	GRIN2A p.E182K	0.22701627667017585	0.0592662	0.202559	0.0925288
PAK5_24	GCAAATCGGGCTATTCCTC	PAK5 p.S364L	0.11047032036262752	0.3685307975711896	0.20239933573925448	0.099265
ARID1A_58	ATCAACAGCAACAGCAGGT	ARID1A p.Q1363*	0.2775887548465966	0.1785466071747344	0.2023021563779831	0.3272628717076004
APC_73	AGTGAGCAAAGACAATCAA	APC p.Q1065*	0.12654849906089752	0.4031008795093856	0.20226663461136957	0.18119710790875285
NF1_34	CATGCAGACTCTCTTCCGA	NF1 p.Q1272*	0.21807621500371724	0.033446	0.20203310658294368	0.0489123
RB1_89	TCACCTCGAACACCCAGGC	RB1 p.R251*	0.20739847050902488	0.16608386144942283	0.20202450320242676	0.17744194276375555
MSI1_5	TCTTCGTTCGAGTCACCAT	MSI1 p.R107Q	0.3138531017012656	0.037992	0.20201188404571835	0.18230345129955244
SMARCB1_9	TCCGCCTGGAAGAGGAGTG	SMARCB1 p.R374Q	0.5072210797761112	3.8994287262502355e-7	0.20179507040986455	0.044281
PREX2_7	TTCGTATCTATGATGAATA	PREX2 p.R117C	0.20385245764227009	0.5258508294314175	0.20134216310243155	0.5310251053560481
PTEN_38	CGTCCCTTTCCAGCTTTAC	PTEN p.G129R	0.34274083943825323	0.0177809	0.20105479592709813	0.16492387481460427
FLCN_8	AGTGCGGGGGCCGTGGAGC	FLCN p.R17H	0.14681970008526232	0.15719131677829187	0.20105407232293804	0.0526759
BRIP1_1	AACTAAAACGACAATACAA	BRIP1 p.R798*	-0.30983	0.175473	0.20054970583164083	0.37835760943606167
ARID1A_72	ATGGATCAGATGGGCAAGA	ARID1A p.Q386*	0.26355939084752217	0.0498445	0.20032386805063457	0.13644298844734148
CDKN2A_65	GTCGGAGGCCGATCCAGGT	CDKN2A p.P48L	-0.0356195	0.896162	0.2001912005691956	0.46215398260260704
IKBKE_12	TCGCCCACACGACGGCAAG	IKBKE p.T373M	0.0753495	0.4517289917230807	0.20003337208451563	0.0455659
ATM_74	TCTTCGACACTTCTCGCAA	ATM p.R1875*	0.27092837920337137	0.0023341	0.19996320715927476	0.0247651
PTPRT_83	ATAACCATCCTGTGGCTGA	PTPRT p.D1346N	0.1569084705841033	0.23371175615830697	0.19964146045569767	0.1296465436105514
RB1_40	AATTTCTTCGTATCGTTTA	RB1 p.E322K	0.0343999	0.8480823059554634	0.1994931516518367	0.26604695021518066
CXCR4_1	AGCGAGGTGGACATTCATC	CXCR4 p.R334*	0.14217369287554044	0.14120900765813257	0.19949296642315212	0.0388965
SETD2_13	CTCTGATCGTCGCTACCAT	SETD2 p.R432C	-0.118461	0.4196506518690426	0.19947137297557552	0.17354203140753263
PTPRD_19	TCCAGTTGTTGACATGTTG	PTPRD p.W466*	0.0116575	0.9467379389206332	0.19914380136539048	0.2532126493730339
NOTCH1_12	GGCCCCCGATGCGAGATCG	NOTCH1 p.R448*	0.0391286	0.6596314859575154	0.1990260742168393	0.0248217
DDR2_5	ATGCCATGACCTCCTGCAT	DDR2 p.G111D	0.023908	0.8003341265137447	0.19891172789738404	0.0350661
ARID1A_86	TGACCGAAAGAACCCGGTG	ARID1A p.R2158*	0.2875200826449074	0.014016	0.19870763966855043	0.0897842
ROS1_6	ATATTTCCACCAGACAGTC	ROS1 p.G1628E	0.0878137	0.6591380350900091	0.19870386616512373	0.3179791059483495
PIM1_6	ACTCACCAGCTCTCCCCAG	PIM1 p.X80_splice	0.17360933383153018	0.11047484881195392	0.19865623605399657	0.0677917
ARID2_28	ACCTCAACAGTCGAATGCA	ARID2 p.Q1043*	0.0852488	0.6420249369936369	0.19862781174018385	0.27834568127509846
JAK1_11	CAGACGCCATAGAGGTACA	JAK1 p.V656I	-0.0820464	0.4570953161255248	0.19829931156964664	0.0713376
TP63_40	GCAGTCGAGCACCGCCAAG	TP63 p.S184L	0.0711076	0.3654971212983714	0.19829229707230184	0.0115363
FLCN_3	TGCTCCGACCGAGGATACC	FLCN p.P278L	-0.0675525	0.6118568479733826	0.19787217151643516	0.1362696592748943
PTEN_24	TAGTTACTCCCTGGTGGAC	PTEN p.G165E	0.2160581148998419	0.16648396870019594	0.19783499395843895	0.2053511228524501
RARA_4	TGGGGGGCGGGACGGGGGT	RARA p.R432W	-0.13291	0.2955211666570744	0.19778673457325507	0.11790435212148204
NF2_5	ATCCGAAACATCTCGTACA	NF2 p.R262*	0.15285377698041996	0.3071183792869451	0.19777179799257447	0.18630570777744856
SMARCA4_42	CCCACCGCATCGGGCAGCA	SMARCA4 p.R1192C	-0.0484431	0.6131872799411483	0.19764284776022917	0.0386523
SMAD4_39	TTTGCGTCAGTGTCATCGA	SMAD4 p.Q442*	0.00970383	0.9295589477745856	0.19747998325618804	0.0716041
TP53_230	CGCCATGGCCATCTACAAG	TP53 p.A159V	0.19113167529015787	0.0720326	0.19744965342745868	0.0631568
PRKCI_2	AATTCGCATACCACGTTCT	PRKCI p.R480C	-0.148104	0.3374563117365533	0.19744807575380768	0.1998444880848187
PTEN_39	GTCCCTTTCCAGCTTTACA	PTEN p.G129R	0.13837612928763454	0.25383247946637755	0.19723632809960817	0.10373684039828238
NF1_12	TTTATCTTACCGGTGCCAT	NF1 p.X464_splice	0.1743940029424342	0.2502534213173681	0.197103	0.19378248347653315
PDGFRA_36	AAATAATCCGTCATTCCTA	PDGFRA p.D135N	0.2572656301568332	0.10420362367470869	0.1970407691906551	0.2136444049676511
GRIN2A_8	GAAGCTTTCCAGAACTGTG	GRIN2A p.S468F	-0.0423279	0.8161670091549815	0.19648912395610968	0.27953516055479155
KMT2C_33	ATCGTGCAACGAGGAGAAC	KMT2C p.R4541*	0.15040015892883474	0.33901985357665265	0.19636660530745537	0.21183092767022557
CDKN1A_2	ATGTCCGTCAGAACCCATG	CDKN1A p.Q10*	0.058514	0.5992431088013256	0.1960940081988344	0.0777805
MTOR_22	CATCTCTTCGGAAAAACCT	MTOR p.S2215F	0.0251174	0.8740031338360197	0.19588955349051176	0.2157204460748706
JAK1_7	CTCCAAATCGCACCATCAC	JAK1 p.R93C	0.007679	0.9437691371080038	0.19585647002000636	0.0714286
ERCC3_3	CAGTGTGCCGACCAACCCA	ERCC3 p.R109*	0.0394207	0.7072794722845304	0.19565314121585137	0.0620871
ATM_52	CAGAATTTCGCTTAGCAGG	ATM p.R2691C	0.0890543	0.5841188281570642	0.19545827276687336	0.2292108993468866
AMER1_31	CTCCATGGTCGAAGCTCTG	AMER1 p.R531*	-0.0919842	0.4770683525915332	0.19537099012905293	0.1299705390391183
ERBB3_36	TCACTTCTCGAATCCACTG	ERBB3 p.R81Q	-0.0158286	0.9195741919694788	0.1952201701014476	0.21249960462915343
SMAD2_12	CATTTCGGTTAACATTGGA	SMAD2 p.R321Q	0.0147294	0.9574223260592004	0.19507702934848029	0.4790316372670395
RYBP_2	AGTACCTTGAGGTGTGATT	RYBP p.X233_splice	0.17037734928703413	0.48810129277041336	0.19499553677046852	0.4274717659099558
ESR1_3	CTCTCCCTGCAGATTCATC	ESR1 p.G442R	0.00386882	0.9781393331722334	0.19487323536086076	0.1669749043005461
BLM_7	CAAAATTTTCGTAAGTGTT	BLM p.S33L	0.17378864587942217	0.4910336938710764	0.1948330626386479	0.44008366617032746
PIK3R2_2	GTTCCCGCCTTTCCTGGGG	PIK3R2 p.G373R	0.0469631	0.5316568375532944	0.1947292579448119	0.00943026
NF1_94	GACAGTCTACGAAAAGCTC	NF1 p.R304*	-0.0694112	0.664054	0.1946724997200283	0.22226498230962585
AMER1_16	GTCTACCCCGAGACAGCTA	AMER1 p.R497*	-0.10367	0.4389885923592224	0.19438267820884925	0.14570494742784013
KDM5C_1	CGTCTACGAAAGGCCCTGC	KDM5C p.R681*	0.16194805267377693	0.0550564	0.19413029298253504	0.0214527
PPM1D_5	GCTCGAGAGAATGTCCAAG	PPM1D p.R458*	-0.190657	0.2900331958330576	0.19410863935587205	0.2801552890493272
SPOP_22	ACTTCACCCATTTCCTCCC	SPOP p.E50K	0.3745191437621113	9.99157084989504e-5	0.19357970745722744	0.0446645
RUNX1_8	ATCTGAAGAGAATCAGAAA	RUNX1 p.X269_splice	-0.0309458	0.9055238584972168	0.19342048445079985	0.4571554184642817
RB1_59	TCCGGCTAAATACACTTTG	RB1 p.R661W	-0.0663355	0.591175	0.193398	0.11636767403380988
ERCC3_5	CCAGTGTGCCGACCAACCC	ERCC3 p.R109*	0.0146593	0.8541233172035738	0.1933648936428264	0.015145
SMARCA4_41	AGCCCACCGCATCGGGCAG	SMARCA4 p.R1192C	0.0747655	0.4381701163982462	0.1929995567648256	0.0451513
SETD2_17	CTCGTTTCATGAATCACAG	SETD2 p.R1625C	0.0818896	0.6402510316656962	0.1929459260248405	0.27044216949542443
NF1_23	AGAAGTTCGAAGTCGCTGC	NF1 p.R2450*	0.0577227	0.6661407260512154	0.1924027849417534	0.15013413239858792
PAK5_7	GATCGTAATCCACCTGGGA	PAK5 p.D334N	-0.255483	0.13115562755581162	0.1923344637020222	0.25409282752388773
FBXW7_67	CAATGGCCAAGGGCAACAA	FBXW7 p.Q218*	0.0215436	0.8591174351389013	0.191586	0.11410655772447437
CDK4_1	GATCACGGGCCTTGTACAC	CDK4 p.R24H	0.2559092315659354	0.3886044922727664	0.19143198121296937	0.5190332299792202
ERBB4_36	ATGGCTCGAGACCCTCAAA	ERBB4 p.R979*	0.20037201346909744	0.14957467978294792	0.1913703053913756	0.16882600616318497
STK11_43	CGGCTTTCCAGCCGCCCGA	STK11 p.Q220*	0.0347324	0.6936260904293207	0.1913026077368956	0.0297725
EPHA5_33	TCGAGCACGTACAGCAGCA	EPHA5 p.R543C	0.1738916313241668	0.2932841467192652	0.1912938629470573	0.24764482282310657
GRIN2A_28	CCCTTGCGGAAGTTTTCAC	GRIN2A p.R1159H	0.10465596792780874	0.26691995640899135	0.1912557381123808	0.0423473
TP53_303	GCATCTTATCCGAGTGGAA	TP53 p.L194F	0.21964832349308272	0.1240663916874024	0.19122986996782293	0.18086459251988957
TCF7L2_14	AACACTTACGAACTATGGA	TCF7L2 p.X334_splice	0.29627569929873016	0.33806908249839585	0.19119679770166065	0.5368600599004625
APC_118	GTTCAGGAAAATGACAATG	APC p.Q1529*	0.26592722571123273	0.1696857334345794	0.19092940600694455	0.3244893465899179
PGR_9	GGTTTTCGAAACTTACATA	PGR p.R740*	-0.0245577	0.9132819396986596	0.1906821532561082	0.3967654315716494
CDC73_1	GGCGCACACACTCTTCATC	CDC73 p.R147H	0.13739482794501892	0.16442159702427955	0.19049006986967956	0.0538075
RARA_1	GGGCGGGACGGGGGTGGCC	RARA p.R432W	0.0930589	0.3133502157282614	0.19038588928085207	0.0389708
RET_14	CTGCTTACGGAGGCAGTCC	RET p.X587_splice	0.0740949	0.40950241374592494	0.19033962862909704	0.0339105
TP63_44	AAGTTTCGGACAGTACAAA	TP63 p.S365L	0.20434035209736917	0.1689739393305553	0.1900714844007826	0.20091187734456104
MLH1_7	TTAACTTACGGTTGATGAA	MLH1 p.X263_splice	0.10607024882528789	0.6360679848506974	0.18928051738263563	0.3980924892164129
ARID2_9	TCACGGAAATGGGAGATGT	ARID2 p.T426M	0.0776865	0.6850075263576313	0.18918735215698565	0.3228727529971885
ERBB2_22	GAATGCCAACCACCGCAGA	ERBB2 p.G660D	0.0573892	0.5939878505742224	0.18902490254536097	0.078864
ARID1A_66	GTTGCTCAGCAAGGCACCA	ARID1A p.Q1493*	-0.174638	0.12593118826990748	0.18878658992503983	0.096771
KRAS_1	CACCAGCTCCAACTACCAC	KRAS p.G12D	-0.0517723	0.6995430452530884	0.1887062344669524	0.15886604015579978
PAK5_62	AGATACGGCCAACAGGCCA	PAK5 p.T46M	0.35777860371755804	0.0102012	0.1885501241797864	0.17655046927467338
GRIN2A_16	TTTTCCCATTCCCGGTCTT	GRIN2A p.E373K	0.0162686	0.8718196355206266	0.1885089458126303	0.0611036
TP53_57	TGCGTGTTTGTGCCTGTCC	TP53 p.R273C	0.0455604	0.6957416581996221	0.18824607631421392	0.10569088280868112
TSHR_3	TTCCATGTTGTGGAGACCC	TSHR p.E736K	0.18162166220945913	0.20278307957431044	0.18814591027998087	0.187099
PTPRS_4	CTGCCCACGGTGGTCAGCA	PTPRS p.V488M	-0.0670342	0.48440539165311886	0.18812632606675875	0.0493402
SMARCA4_48	CACCCGGGCTGGGGGGCTC	SMARCA4 p.R1157W	0.10491374421882813	0.37730357130768893	0.18792326574684937	0.11363649090203654
NFE2L2_11	TAGATCTTGGAGTAAGTCG	NFE2L2 p.L30F	0.282154	0.0798066	0.18763426912891124	0.24456985687541236
GRIN2A_82	CTCCCTAGGTTTGTCGACA	GRIN2A p.E1301K	7.487730354725369e-4	0.9956047758561014	0.1874906478440412	0.16705156572839489
SETD2_2	AACGAGGAAGGGATGCTGT	SETD2 p.R2040*	0.23047171870881833	0.1682857849253571	0.18747371022183287	0.2626707051707882
APC_2	CAACTACACGAATGGACCA	APC p.R283*	0.047922	0.7836075853525891	0.18728888808898897	0.28274310179465556
ARID1A_76	CAATGGATCAGATGGGCAA	ARID1A p.Q386*	0.2676853293738133	0.0239776	0.1872316312891708	0.11476661214882294
MAP2K1_10	TAGAAGCCCACGATGTACG	MAP2K1 p.G128D	-0.0329104	0.8242613624704963	0.18715052114333583	0.2056056780936087
RAD50_8	AGCGGCGTGATGAAATGCT	RAD50 p.R725W	0.0832781	0.5344417516732363	0.18693780397381252	0.16286773116394954
CTCF_7	CGTCACATGAAAAGCCACA	CTCF p.H284Y	0.1287490539788276	0.3401695566022673	0.18661498710937177	0.1666568078865387
STK19_1	AGGGTCTTCCGGCGCAGAG	STK19 p.D89N	0.00534067	0.9558811517976517	0.18657396569107257	0.0528797
FGFR4_8	CTCCCCGTATCCTGGCATC	FGFR4 p.P689S	0.16203192323224616	0.11103418787895558	0.1865360649347053	0.0665678
FGFR3_9	ATCTTCATCATCTCCATCT	FGFR3 p.M528I	-0.0491813	0.7412588509393614	0.186421	0.20981041381866636
NOTCH1_18	CCCTCGGGGTACACGGGCC	NOTCH1 p.S402L	0.20925703639287677	0.0416905	0.1863749220465558	0.0698154
ERBB3_4	TCCTCCATACTGATACTTG	ERBB3 p.G284R	-0.0742853	0.6988540397944337	0.18616529421432393	0.33110805923906317
SPEN_4	TAAATCGTTGGGACTCTCA	SPEN p.R1339C	0.33291030936391974	0.12724901959990334	0.18612807105834067	0.394321
NOTCH3_24	ACTGCCAGGCGGGCCGCCA	NOTCH3 p.R1915H	0.0627818	0.3962218302409455	0.18604895396401297	0.0118609
ERBB3_5	CCTCACAGGCTGCAAATGT	ERBB3 p.E332K	0.15386707658656237	0.16734021394123805	0.18585419385888047	0.0953206
CDH1_6	TGGCTCTGCCAGGAGCCGG	CDH1 p.Q23*	0.15262666776443518	0.1081098483649517	0.18567168905181927	0.0506003
TP63_20	GGGATCTTCGTTTCTTGAT	TP63 p.R393Q	-0.0841906	0.6388108954962313	0.1855476921188364	0.2994620931917555
TP53_122	TTTGCCAACTGGCCAAGAC	TP53 p.Q136*	0.18707583755013457	0.083017	0.1855464383034788	0.0856213
KDM6A_12	CCTCCACCTGTTTTATACA	KDM6A p.X1336_splice	0.13682051445371085	0.32263446026309073	0.18550761766624596	0.17979123355909105
KMT2C_36	AGATTCGTAAACAACAGAA	KMT2C p.R3252C	0.10652426530878924	0.5903718234564019	0.18542102531467625	0.34846396597871804
PDCD1_3	CTCTCTGGAAGGGCACAAA	PDCD1 p.X146_splice	-0.156668	0.27458069980293986	0.18539616880958812	0.1948876127629661
GRIN2A_12	AAAAATTTCCCTCCAGAAG	GRIN2A p.G1322E	0.1267413108530123	0.3875369971485673	0.18523960825615352	0.2064386176216606
TP53_290	CAGAAACACTTTTCGACAT	TP53 p.T211I	0.0601125	0.5868293919339383	0.18493963070494931	0.094081
WT1_1	GGTTATCGCTCTCGTACCC	WT1 p.D342N	0.17158412390493008	0.26204181390136677	0.18490528167963088	0.22683570519191837
PIK3CG_41	CTTTCGGGAATATCCATCA	PIK3CG p.E263K	-0.00418895	0.9791016016801776	0.1848863643642479	0.24667053967123304
TP53_34	TTTTCGACATAGTGTGGTG	TP53 p.R213*	-0.0189468	0.9274720982142436	0.18484206128988437	0.37398134642981873
VHL_9	TGAAAGAGCGATGCCTCCA	VHL p.R161*	0.00315682	0.976393	0.1847059118568342	0.0827858
ARID1A_42	GAATATTTCCGACGATGCC	ARID1A p.R1721*	0.381192	0.00832961	0.18447852588752173	0.20278200910985303
MYCN_1	CCCCCCGGGGGAGGACATC	MYCN p.P44L	-0.070679	0.5086566178034115	0.18370361762791323	0.0850924
VHL_8	AAGAGCGATGCCTCCAGGT	VHL p.R161*	0.0108658	0.9193504358463112	0.18362211191656985	0.0867103
NFE2L2_4	TACTTCTCGACTTACTCCA	NFE2L2 p.R34Q	0.2658233317433644	0.0524847	0.18339735686509623	0.18145697823300128
TCF7L2_15	AGTGCCCGACACTTCTTTG	TCF7L2 p.R448Q	0.0553525	0.512907	0.18338638152988543	0.0299735
KRAS_9	ACATCAGCAAAGACAAGAC	KRAS p.A146V	0.1967010047485512	0.7181076790851244	0.18328787948958777	0.7366679125393031
ANKRD11_6	TCAGTGCGCGACCGTTTCA	ANKRD11 p.R2579C	0.1862735153207237	0.0307914	0.1832481078513398	0.0336591
KMT2D_95	CAGCAGCAGCAGCAACAAC	KMT2D p.Q3860*	0.2013309538142906	0.0501115	0.18323622748363577	0.0747201
NFE2L2_12	GATCTTGGAGTAAGTCGAG	NFE2L2 p.L30F	0.0133375	0.9289585711073132	0.18322442262036628	0.22000764899060485
GRIN2A_21	ATCATGAAGGCAGCCAGAT	GRIN2A p.M653I	0.29279493620127245	0.0254109	0.18311173907157552	0.1627589077296988
CIC_2	CGGTCCGGTTGTCCTGGTT	CIC p.R228Q	0.0703006	0.4121554969352247	0.18269507433598495	0.0328805
PIK3CA_29	CCAAGCATCATTGAGAAAA	PIK3CA p.M1004I	0.0185717	0.8884660819562754	0.18258471096102993	0.1674214195319113
PIK3CG_2	TATTCTCCACGGCGCAGGA	PIK3CG p.R477H	0.0628006	0.5635968910138925	0.1825413269079632	0.0927964
PTEN_35	CAGATCCTCAGTTTGTGGT	PTEN p.Q214*	0.0836052	0.4368097246432728	0.1824758093548506	0.0893649
RBM10_9	TACTCACGGTACTGGCTGT	RBM10 p.X486_splice	-0.00559273	0.96943826032710545	0.1823915465603098	0.21097397139287544
TCF7L2_54	TCCACCTACATAGTTATCC	TCF7L2 p.X423_splice	0.21446352338285468	0.28146468837765665	0.1822940331278421	0.3601399262851516
TP53_161	ACCCTTCAGGTACTAAGTC	TP53 p.Q331*	-0.14642	0.3554555013001907	0.18224767621951032	0.24868168959615244
PPP2R1A_1	GCGGCCCGCCGCACCATGG	PPP2R1A p.R183Q	-0.0120404	0.8720886160837293	0.18206010242320209	0.0147105
PAK5_51	TTCTCCCTGTACTTTTCGG	PAK5 p.E148K	0.0517353	0.7309441916087072	0.1820581574245109	0.22586982296363128
PTPRT_19	TAATCGAACACCAGCCTCC	PTPRT p.D1285N	-0.0215323	0.8400363014633963	0.18204737917570896	0.0873112
SF3B1_18	TGTTCTTGGAAAGCATAAA	SF3B1 p.E902K	-0.11615	0.5348374622204388	0.18188526316436943	0.33004197527760304
NOTCH1_7	CCATGGCCGCACAGGTGAG	NOTCH1 p.R365C	0.20282544103345215	0.0806737	0.1815726036854773	0.1179804110983835
RAC1_1	AGCGATCCGAGCAGTCCTC	RAC1 p.A191V	-0.0327155	0.7663476852655733	0.18141523853088432	0.0989513
HIST3H3_14	GGCGCTTCGCGAGATCCGC	HIST3H3 p.R50C	0.11003925499904968	0.2964544015895284	0.18133589099020883	0.0852379
RNF43_34	CAGAACGCAGTGGGTACCT	RNF43 p.R454C	-0.343232	0.00895151	0.18105915827158683	0.1666486856430682
KMT2D_60	CCAGCGACTACGAGAGCTG	KMT2D p.R2685*	0.12714509118162898	0.2051118502871894	0.180921	0.0712893
ERBB3_14	CCACGCGGAGGTTGGGCAA	ERBB3 p.V104M	-0.0104698	0.9010473580942722	0.18070057579384355	0.0315211
TP53_263	TACTGGGACGGAACAGCTT	TP53 p.R267W	0.3838345692629727	0.00820522	0.1804798618166784	0.2148141691205361
SF3B1_3	ATGTCCGTAACACAACAGC	SF3B1 p.R625C	0.24130364558826248	0.0678638	0.18037683347398376	0.1727241794047964
SF3B1_6	GAGTATGTCCGTAACACAA	SF3B1 p.R625C	0.0206112	0.8577711853912552	0.17986500223811208	0.11718907467335764
CARD11_17	TGCGAGACAAGGTGGGAGT	CARD11 p.R337*	-0.0408831	0.7963801460892664	0.17936715773621803	0.256857
IL7R_7	TTCCATAACACACAGGCCA	IL7R p.W264*	0.17420747797908714	0.37403689282463304	0.1793310850082181	0.3602107193608433
FGFR2_2	TACAGTTCGTTGGTGCAGT	FGFR2 p.E731K	0.2612176392713031	0.11509227967149006	0.17927065893000263	0.28006806138854734
RASA1_8	CACCTGACGAAGGCGTTTA	RASA1 p.X592_splice	0.14065526509172796	0.17457518635879585	0.1792335817056519	0.0835713
PDGFRA_34	CTAAATAATCCGTCATTCC	PDGFRA p.D135N	0.16804133620007874	0.3488683286351924	0.17899434234032993	0.3183970103986153
PTPRT_37	GTCGTGTGAGGAGCACTCG	PTPRT p.R364Q	0.15219092341971102	0.2336672472032809	0.1789483642113828	0.161388
TGFBR2_14	CAGAACGCTTCAGTGAGCT	TGFBR2 p.R562C	0.00446984	0.9718053947664268	0.17889990045654428	0.15667222954265544
FOXA1_17	GCTACTTGCGCCGCCAGAA	FOXA1 p.R261C	0.0191974	0.8687070917185402	0.17881063277715734	0.1232709723080008
FOXP1_2	TGCGAGTAGAAAACGTTAA	FOXP1 p.R525*	-0.096615	0.7481493052812836	0.17880959082834536	0.5518184018023841
TP53_56	CCAGACCTAAGAGCAATCA	TP53 p.X187_splice	0.1927757324435596	0.1543927118777233	0.17857495293384618	0.1872129705530305
PAK5_33	TTTCGGGCGGCCCTGCAGC	PAK5 p.A434V	-0.0741627	0.38237292518416127	0.17842270421483178	0.0352568
SMAD3_25	GCTGACACGGAGACACATC	SMAD3 p.R287W	-0.0809489	0.5208952944617773	0.17833767767587974	0.15642225869688425
CD79B_4	GCTGTCATCCTGGGGGCGG	CD79B p.X184_splice	0.0221417	0.8356272896910265	0.17782040286644107	0.095266
CREBBP_43	CGGCTGTGCGGAGGCAACG	CREBBP p.R1446H	-0.380563	3.971045979953237e-5	0.17758974564977667	0.0537581
KEAP1_8	GCCGCTCCGCGGCACCTGC	KEAP1 p.R362Q	-0.0191268	0.7674952274765778	0.17754758233100176	0.00595814
CREBBP_7	CCACGCTCTGCATGCTGGT	CREBBP p.T1688M	0.0596225	0.6195485014403102	0.17748507034258768	0.1391107331201335
FGFR2_3	ACAGTTCGTTGGTGCAGTT	FGFR2 p.E731K	0.2211271788718758	0.2978292075555245	0.17710937185900516	0.4045503771022413
GRIN2A_20	TTGGATCATGAAGGCAGCC	GRIN2A p.M653I	0.1018672198116263	0.3785786733110351	0.17687644570040478	0.12593429115557944
FAT1_21	TTCGAGCAACCAAATACGA	FAT1 p.R2597*	0.4464284385130808	0.0501081	0.17627846930626115	0.44022150005798233
CARD11_2	GCTTTCTCGGCCAGAGAGC	CARD11 p.E702K	-0.128478	0.369402	0.17610379930226588	0.21723446195577528
EP300_7	GTTACTTACGTTTGAGGCT	EP300 p.X1224_splice	-0.644475	1.5714825740034891e-9	0.1758514316335523	0.0955044
NF1_45	ACTTACCACTAAAATGAAG	NF1 p.X2143_splice	0.3204568349768018	0.10294916421900104	0.17579247503849274	0.3721406890315837
PTPRT_80	CATCCTGTGGCTGAGAACA	PTPRT p.D1346N	0.20715784187870784	0.2288222773629929	0.1753547006968464	0.30851573472139004
FLCN_5	AGAGAGTGCGGGGGCCGTG	FLCN p.R17H	0.0919784	0.32728818192469095	0.17530537574708166	0.0617698
IL10_4	TCTCAGTTTCGTATCTTCA	IL10 p.R177Q	0.2566072136983299	0.0596255	0.17515005720576607	0.1990301491012636
AXIN2_9	CTGCGATGCATTTCTCTCT	AXIN2 p.R339H	0.0841892	0.5812004304343724	0.17501031820497673	0.25127396017103937
PDGFRA_19	TCCTCGGGCAACTTGATAG	PDGFRA p.R804Q	0.0152114	0.8939148499848892	0.17499226678156993	0.12435876265893772
PTPRS_50	GACGCTGGGCTTGCCGTTG	PTPRS p.V1128I	0.0714538	0.4502462100619791	0.17485170460771982	0.064508
EGFR_2	CACGCAGCTCATGCCCTTC	EGFR p.T790M	0.2782399611004231	0.00188108	0.17476557438842866	0.051168
MAX_2	TTGGGCCCGGGATGCCTGT	MAX p.R60Q	0.0047211	0.9693332530183794	0.1745251545214093	0.1547158308155337
ARID1A_84	CTCAGTGACCGAAAGAACC	ARID1A p.R2158*	0.1384262083052525	0.2545267810946582	0.17445922614733272	0.15093689496784177
KRAS_11	AGCAAAGACAAGACAGGTA	KRAS p.A146V	-0.23333	0.20386761410960175	0.17417202617313857	0.3405888765419333
FGFR3_24	TGGACGTCACGGTAAGGAC	FGFR3 p.V754M	0.36249796075215346	0.0102989	0.1741230253907122	0.21867917167076453
RB1_43	AAGGACCGAGAAGGACCAA	RB1 p.R579*	-0.0574661	0.5963607750456392	0.1739965323813607	0.10794202020763104
RB1_4	TTTAGAACGATGTGAACAT	RB1 p.R552*	0.2455118929976586	0.12433127380195888	0.173601	0.27755187983168167
ASXL2_9	TCTGCGAGCACTGATCAAC	ASXL2 p.R284*	0.1988565194451177	0.0704709	0.17358712716937091	0.1145296707971211
FLCN_6	GTGCGGGGGCCGTGGAGCT	FLCN p.R17H	0.12801418973571865	0.22611756193789628	0.17348882526662684	0.10084081651162324
CDKN2A_58	TTCCTACCTGGTCTTCTAG	CDKN2A p.G106S	-0.153905	0.2381428165671248	0.17335377797224952	0.18235689222496737
AMER1_20	ACCGAGATGGGACCAAGCG	AMER1 p.R353*	0.0326396	0.7694178848926527	0.17322180066369114	0.11936701402680668
IKZF1_61	GGAGGCATTCGACTTCCTA	IKZF1 p.R111*	0.0945178	0.36932127601550824	0.1730806688848276	0.10002462575909826
EPHA7_14	TCTGGGATCGGCTTAAGTC	EPHA7 p.R426Q	0.0553815	0.7086917889663655	0.1730187226510445	0.24287821100091392
PREX2_13	CTGGTGTCGGTGAGTGTCC	PREX2 p.S47L	-0.0602694	0.6183777241783368	0.17289439532346718	0.15246907911416344
JAK3_3	GGCTGCGGCGGAGAACATA	JAK3 p.R403H	-0.090935	0.4661768257884269	0.17267781569224022	0.1653834821135359
DOT1L_4	AGAACACGCCCCAGTACCT	DOT1L p.T735M	-0.0974813	0.49228594636942646	0.17252653844520768	0.22355073727822244
KMT2B_2	GGGCGAGGCCTGTTCTGTA	KMT2B p.R2587*	0.0605961	0.6049781280409027	0.1721575121106219	0.14132625488400158
PIK3CG_7	GGCGGCGGACTTCTACCAC	PIK3CG p.A85V	0.0883275	0.3883315845015839	0.17206064785422953	0.0926133
PIK3CD_7	AGGCCTGCGGGGTGGGGAG	PIK3CD p.G124D	-0.119357	0.5296484828160557	0.17203455533854609	0.36326649869837857
PTPRS_39	GCCGCGTCATCATGACGAT	PTPRS p.R1492Q	-0.0126322	0.9332208064671156	0.17197090917850805	0.2532255132093436
PIK3CG_30	CTGTTCGCTTTGGCTTTCG	PIK3CG p.E267K	0.12102132777716965	0.27343649969180633	0.17186712156781916	0.1197759881128864
PTPRT_33	GCTGTTCACCATCATGAAA	PTPRT p.M76I	-0.0954146	0.5691907678403391	0.17160743448314325	0.30501003192794274
ANKRD11_2	GGCGGGGTACGGCGCCTCC	ANKRD11 p.A2017T	0.051623	0.4180827012081769	0.1711743853084901	0.00718502
TP53_288	ACAGAAACACTTTTCGACA	TP53 p.T211I	0.2608842426847961	0.079911	0.17109198807625012	0.25130701577935366
FGFR2_10	CATCGAGATTTAGCAGCCA	FGFR2 p.R625*	0.0739646	0.6504990976341771	0.1710753741513456	0.29422699194592544
ESR1_1	TCCCTGCAGATTCATCATG	ESR1 p.G442R	0.25439945592596014	0.10297633228894908	0.1709319642857384	0.2736850015108516
PTPRT_81	ATCCTGTGGCTGAGAACAG	PTPRT p.D1346N	-0.106953	0.4535258208760044	0.17075143638680504	0.23041961604993824
NF1_60	ACCAGGCAAGCATGGAAGC	NF1 p.Q1070*	0.10897687271061487	0.35433309979106253	0.1706325461295995	0.1468391676254857
EGFR_18	GCAGCGCCCGGAGCACTGC	EGFR p.R222H	0.13721327019383714	0.1213698145481214	0.1705220078335361	0.0541956
RET_2	CAGCTGGCGGTGCTGGTCA	RET p.A373V	0.0897935	0.26833225919446263	0.1705161642140039	0.0354362
PTPRD_39	GGAGATTTCCATTCCAGAA	PTPRD p.S912F	-0.23642	0.1396201604568544	0.17037839322813367	0.28504525414958753
KMT2C_9	ATGCGTCAGAAAAGTAAGC	KMT2C p.R1758C	-0.0546431	0.7490959481920273	0.17024507966691288	0.3180307515642346
PPP2R1A_15	AGGACTCGGTGCGGCTGCT	PPP2R1A p.S219L	0.25875800213378086	0.00421142	0.17024149145289016	0.0599581
APC_48	CGTATACGACAGCTTTTAC	APC p.R232*	0.10560106271861018	0.5693144873760736	0.16969302442016349	0.36026060048036895
CDKN1A_7	GGCCTCGCCGGGGCCCCGT	CDKN1A p.R84Q	0.0433818	0.6217929754860259	0.16964512977274102	0.0534505
RBM10_26	GCCTCACCTGACTTGGGCA	RBM10 p.X164_splice	0.0196239	0.8799837283334152	0.16956415777584144	0.1916087879886991
RHOA_1	TGCCCAGCTGTGTCCCACA	RHOA p.G62E	0.0552371	0.579702	0.16949194333005604	0.0889397
HLA-B_1	AAGCGGGGCTCCCCGCGGC	HLA-B p.R45H	0.0707864	0.3469401089351921	0.16945535428709124	0.0242575
ESR1_15	ATCATCTCGGTTCCGCATG	ESR1 p.S432L	0.13980253313455604	0.1937849696584173	0.16939193112090364	0.11534699641968348
CDKN2A_116	CCCATCATCATGACCTGCC	CDKN2A p.M53I	0.32035080974084273	0.00751732	0.16920614588510324	0.1584964616335172
PRDM1_4	AAGACGTGGGAGCCCCGAA	PRDM1 p.R286C	-0.0145588	0.8973174889080923	0.1691844873955132	0.13324654153642004
FOXP1_9	AATACTTACGGGCTGAGGG	FOXP1 p.X382_splice	0.0685694	0.6467033633567012	0.16895845714925992	0.25834616230545304
POLE_1	CCGTGCGTGCCTTCCGGGA	POLE p.R759C	0.0460311	0.6126424396721606	0.1689445212537191	0.0629444
RB1_55	CTACCTCCTGAACAGCATG	RB1 p.X737_splice	0.0803903	0.478728	0.16879904013544456	0.1367255434938764
MAX_18	GGAAACTCACCTTCTCTCC	MAX p.X57_splice	0.017011	0.8889708615764089	0.1687761889731916	0.1655997558763904
AXIN1_4	AGCCAGCCGAGCACCCTCC	AXIN1 p.R723*	-0.0184662	0.8409981087137379	0.1687688358116497	0.0663853
CREBBP_36	CAACTGTCGGAGCTTCTAC	CREBBP p.S71L	0.0267288	0.7946477232551391	0.1686318654418361	0.10017063156360988
MPL_5	CATCAGGTTCGCTGCGCAG	MPL p.E259K	0.10632493835043803	0.20897590150550135	0.16836190351961094	0.0465553
EPHA7_9	TAATTTCCATAACCAGCAG	EPHA7 p.G524E	0.11311588542164536	0.4911956248337818	0.16833168141878713	0.3054257870035258
KMT2D_25	AGCGAACTGGTGCCACCAG	KMT2D p.R5097*	0.15964579684756575	0.0984928	0.16825416845536273	0.0816849
PTPN11_18	GGTCAGGGATGGTCCAGAC	PTPN11 p.S502L	0.0986461	0.39568673428513873	0.1682377093119698	0.14723103683206432
KMT2C_16	GAACTCCACGACCTGTTGT	KMT2C p.R2139*	0.0414633	0.7689240514784388	0.16810844665500638	0.2332249722007196
CCND1_8	TGGCTTGCACACCCACCGA	CCND1 p.T286I	-0.0409129	0.7350415880669251	0.1678170153603804	0.16412226204866034
AMER1_34	GGTCGAAGCTCTGAGATGT	AMER1 p.R531*	-0.304386	0.0511871	0.16775493952738138	0.2802825417777188
JAK1_14	GACGCCATAGAGGTACACG	JAK1 p.V656I	0.0499179	0.6635038692091861	0.16766376757593984	0.1435078628335076
MET_3	TGCCCAGATCTTAAAACAG	MET p.X963_splice	0.1816134443535256	0.32850947315192497	0.16760521392387695	0.3674185293642839
JAK3_2	GGGCTGCGGCGGAGAACAT	JAK3 p.R403H	0.0441187	0.7627856799930601	0.1674645984936099	0.2514199257513941
ATM_4	ATTCGAGTGTGTGAATTAG	ATM p.R250*	-0.182254	0.29575098843498426	0.16746160787434783	0.3345247802424431
ARID1A_80	CAGCAGCAACGGTGAGTAA	ARID1A p.R1335*	0.0332803	0.7778687594225083	0.1674001910317814	0.15560948711000844
PTPRT_51	ATTCCACTTCCTTCAGGAT	PTPRT p.E324K	-0.00581735	0.9730036668700895	0.16723881222359832	0.3301925362694172
MTOR_3	CAGGCCCTCATCTACCCAC	MTOR p.A1971V	0.0313484	0.7276535456565822	0.16723387258488873	0.0629062
NEGR1_4	GCCGCCTCCAGCCTTTGAA	NEGR1 p.P251L	0.0582514	0.582677	0.16711469962900627	0.11460811948739548
TCF7L2_35	GTCGGGCACTGTTCGGGCT	TCF7L2 p.R448W	-0.0861137	0.33909537370717324	0.16673474584359776	0.0634697
TP53_282	CTGCCCTCAACAAGATGTT	TP53 p.L130F	0.1636536147190976	0.15567239404945574	0.1664862861801042	0.14868888258145607
PIK3R2_3	TTCCCGCCTTTCCTGGGGG	PIK3R2 p.G373R	-0.102221	0.2448819564169205	0.16642413114740273	0.0580172
TP53_196	CCTCTCCCCAGCCAAAGAA	TP53 p.Q317*	0.13395602510858343	0.2526122521505147	0.16584292337234097	0.1566421931787456
KMT2D_82	CACTTCGCTGGGGGCTGGG	KMT2D p.S2488L	0.16012028950338972	0.19359320084081352	0.1657258392683597	0.17848696754597732
PTPRT_60	ATTTCTTCTATATATTGAT	PTPRT p.R791K	-0.0327386	0.8916473769132414	0.16565624028742845	0.48996243797871303
SMARCA4_76	AAGCCGCGCCTCATGGAGG	SMARCA4 p.R1336C	-0.0994394	0.3300968791174804	0.1654001413051565	0.10430102834392728
CDKN2A_134	GAGCCCAACTGCGCCGACC	CDKN2A p.P70L	0.0850323	0.3572137299702199	0.16538596403354558	0.0731432
PTPRS_25	AGCGCACGCTGCAGTCCAG	PTPRS p.T613M	0.1872519574131712	0.0417704	0.16518736572009143	0.0725904
MAP2K1_12	GAAGCCCACGATGTACGGA	MAP2K1 p.G128D	0.27396853216876255	0.11900538569289658	0.16509564655293515	0.34799480143450595
GRIN2A_87	GCGGCATCGTAGATGAAAG	GRIN2A p.D731N	0.092849	0.6051935598754883	0.1647600452999406	0.3586424340529268
FLCN_7	GAGAGTGCGGGGGCCGTGG	FLCN p.R17H	-0.0207076	0.8393458197255956	0.16450667271265196	0.1068066076246475
ALK_31	TCCTGGCGCCGCATCCCCT	ALK p.R291C	-0.0181994	0.8224003108867763	0.16441855264809113	0.0422073
HLA-A_1	ACCTCATGGAGTGGGAGCC	HLA-A p.R30K	0.2061498372241093	0.0426565	0.16431854896974116	0.10639764966393356
EGFR_58	TTCCTTCAAGATCCTCAAG	EGFR p.E709K	0.3859257326283987	0.00361724	0.16410553459387386	0.21715636764317195
PIK3CG_20	CACTGCGCGGCTTCATCCT	PIK3CG p.R26H	0.0384981	0.6952371819944253	0.1640456825561093	0.094715
IL7R_13	ATCGGGGAGACTGGGCCAT	IL7R p.D278N	0.0408245	0.7572371910618165	0.16397190505706313	0.2139902701634903
SETD2_6	GAACGAGGAAGGGATGCTG	SETD2 p.R2040*	-0.135991	0.4220427488530823	0.1639523039759668	0.332094
ATM_22	TGCTTCGTGTTCATATGTT	ATM p.E2039K	0.0505354	0.7667833596571891	0.16374571580517783	0.33600942330271366
MSH2_7	ATATATTCGACAAACTGGG	MSH2 p.R680*	-0.264045	0.23266527612369736	0.16368229799333175	0.4575974399643258
MAP3K1_12	CTTGCGCTGTGTTTGAGGA	MAP3K1 p.R1023H	-0.0409553	0.745308	0.16362772388167332	0.19366783748136332
PTEN_45	TCCCAGTCAGAGGCGCTAT	PTEN p.Q171*	-0.0126973	0.9240709328190386	0.1633651193643794	0.21926981639942836
ATM_24	ACATTGCTTCGTGTTCATA	ATM p.E2039K	0.0917078	0.5113121575050918	0.16317404041201097	0.242292
TCF7L2_38	AAGTGTCGGGCACTGTTCG	TCF7L2 p.R448W	-0.01714	0.8954953425704383	0.16283038066894878	0.21152918296418172
PAX5_10	TTTTTCCACCACTTTGGGT	PAX5 p.E97K	0.1869100275987803	0.17129275500134397	0.16280997966607014	0.2336253462123857
MUTYH_1	GCAGACCTGAGAGGGAGGG	MUTYH p.G382D	-0.019189	0.9239243566283076	0.1627755424040825	0.4175223775167813
RET_10	AGCAAGAGACGGCTGGAGT	RET p.R525W	0.071382	0.48607231296694253	0.16260182028811154	0.11236213845769086
TP53_98	GATGTTCCGAGAGCTGAAT	TP53 p.R342*	-0.148812	0.44648970829625473	0.16255613960139215	0.4045326446102017
PLCG2_16	GAGCGGATCCGGCAGTGCT	PLCG2 p.R589H	0.17450609702610906	0.0607681	0.16246380566343213	0.0809413
PIK3CA_61	AATTGAACCAGTAGGCAAC	PIK3CA p.P104L	0.4529338375034667	0.00130348	0.1623877772531103	0.2504656951789174
AR_7	TCCGGCCAGAGCCAGTGGA	AR p.G373R	0.0586589	0.5295052699765599	0.1623745500951237	0.0815587
TP53_43	GAGACCGGCGCACAGAGGA	TP53 p.R282W	-0.0437427	0.6583224539643936	0.1623055199976227	0.1002513147619991
ERBB4_26	TTCCAACGCGAGAAATCCC	ERBB4 p.T926M	0.2111383365015134	0.0298029	0.16225233833724104	0.0952325
EPHB1_4	GTGTTTCCAGAGACTATGA	EPHB1 p.P207S	0.25099610615083057	0.19666835822013767	0.16224137104533223	0.4044813373474768
TP53_100	GAGATGTTCCGAGAGCTGA	TP53 p.R342*	-0.0508733	0.706615	0.16142534826509708	0.2312028425037008
ERBB3_28	GGTGCTTCGGGGGCCTACG	ERBB3 p.R475W	0.0429117	0.7017777231799012	0.1613285537158147	0.14951977360256077
TP53_45	GACCGGCGCACAGAGGAAG	TP53 p.R282W	0.16174256829903907	0.1683498764729327	0.1612360769609908	0.16975416792724704
RBM10_23	AGCTCAACAGGTGAACACC	RBM10 p.Q571*	0.052322	0.6684424056031759	0.16091963778755208	0.18732500075731745
APC_69	CATACTTGGATTTTTGTCC	APC p.X438_splice	0.1737156769998333	0.25074930588249633	0.1608885543338277	0.2876108214343652
MAP2K4_6	AGGAGTTCAAAACCCACAC	MAP2K4 p.Q69*	0.00227255	0.9884368113844324	0.16075652005843474	0.30462220416881214
APC_22	TGGTGCTCAGACACCCAAA	APC p.Q1367*	0.11965470893919164	0.39746767847366954	0.16069307974643277	0.2557101543856043
KDM6A_11	ACCTCCACCTGTTTTATAC	KDM6A p.X1336_splice	-0.079501	0.5640892409599958	0.1606378755531936	0.2429464155203184
ETV1_10	TTCGTTGTAGGGGTGGGGG	ETV1 p.E450K	0.13305995833376572	0.4674537751651855	0.16063064850147318	0.38033393503292046
NF1_1	AACTTCGAAATATGTTTGG	NF1 p.R440*	0.14669839921065525	0.4576679428915969	0.16058019124902836	0.416265
GNAQ_9	ATTAGTTCGAGAAGTTGAT	GNAQ p.R114*	0.2706559299717679	0.13591001410000905	0.16042650971397945	0.37749420346913665
MAX_20	CACTGGAACGAAAACGTAG	MAX p.R33*	0.0103433	0.94455	0.16015401571075205	0.28082434808975626
FOXP1_10	CATTCTGCAGCAAGTATAA	FOXP1 p.X511_splice	-0.371522	0.0586908	0.16008851622232856	0.4132137202239001
ERG_4	TAGCCGCCTTGCAAATCCA	ERG p.R302C	-0.0768343	0.3824056231293062	0.15995953018634515	0.0683343
GRIN2A_78	CAAACACGAGGCCGTGGAT	GRIN2A p.V99M	-0.0387087	0.7193001879666516	0.15988264389851298	0.1370509832965847
EGFR_30	GCACACGTGGGGGTTGTCC	EGFR p.V774M	0.0619736	0.5080137128910918	0.15984828748945346	0.0874621
KMT2D_83	CCCACACTTCGCTGGGGGC	KMT2D p.S2488L	-0.00481677	0.959119	0.1598350995638542	0.0885765
PIK3CA_31	TAAGGGTTCTCCTCCATGG	PIK3CA p.E365K	0.14921434779738274	0.26194212643632026	0.15937054070470855	0.230897
PTEN_16	TTCCCTCAGCCGTTACCTG	PTEN p.Q245*	0.00145005	0.991434	0.15879217445780652	0.23934312020730503
DNMT3A_1	GCCAAGCGGCTCATGTTGG	DNMT3A p.R882H	0.2341643827982884	0.0312852	0.15855910310142277	0.14509679679510878
MAP3K1_13	TGCGCTGTGTTTGAGGAGA	MAP3K1 p.R1023H	0.00885289	0.9565901005330616	0.15824138897647202	0.32998798708955696
PTPRS_48	GCGACGCTGGGCTTGCCGT	PTPRS p.V1128I	0.0127694	0.8808548182852942	0.15801381524705363	0.0633586
TP53_174	CATGCAGGAACTGTTACAC	TP53 p.C242Y	-0.187515	0.2336770228475947	0.15796125081385837	0.31424791494400023
GRIN2A_35	TTCGCGCTCTGTCACGTCG	GRIN2A p.E50K	0.18733367196889705	0.0835155	0.15788337148643616	0.14485125704447616
PBRM1_13	TTTTTCTCACCGGTAATAC	PBRM1 p.X332_splice	-0.0450475	0.7655102380347764	0.1578192540369049	0.2950570689820778
PTEN_43	TTCCCAGTCAGAGGCGCTA	PTEN p.Q171*	0.12836637922330665	0.3299804553887679	0.15777094076862974	0.23114031860560377
MAX_6	TCACCTTGCTGCTCCAGAA	MAX p.X99_splice	-0.163928	0.12136432750483536	0.15764353783500001	0.1350691690618909
MAP2K4_30	CAGAAACATCCCTTTATTT	MAP2K4 p.P365S	0.0157669	0.94255	0.15759525761746696	0.47101352792736184
PDCD1_2	TCTCTCTGGAAGGGCACAA	PDCD1 p.X146_splice	0.14620799788100516	0.342715	0.1575631218431267	0.3065782399816143
INHA_6	GCACCAGGACGGGGTGGGT	INHA p.V193I	0.0969235	0.4200763958406511	0.157522	0.18988693594569267
ERBB3_19	TGAACTGCACCAAGATCCT	ERBB3 p.T355I	0.0772537	0.4455846379885112	0.1575214284896145	0.11961753890899904
EPHA3_44	GGGACGAACAGCCGCAAGT	EPHA3 p.T519M	-0.0487708	0.7191703527657496	0.15719217004247812	0.2457043254996506
TCF7L2_18	GTGCCCGACACTTCTTTGG	TCF7L2 p.R448Q	0.0115323	0.8963008068949299	0.15689547646529864	0.0758051
MAP3K1_17	CAGAGGAACGAATGATCAG	MAP3K1 p.R183*	-0.124726	0.5364015915087408	0.1567138621468308	0.43606522692807936
ATRX_18	AAGAAAAGGCGACGTATTA	ATRX p.R1426*	0.1818682468562103	0.36258844201175405	0.1566600120515778	0.433122
GRIN2A_52	GTCATCGTAGGAGACAGAA	GRIN2A p.D282N	-0.0963643	0.6476049764639182	0.15658937711648427	0.4568217103187853
NOTCH4_1	CACACGCAGTGAAAGCTAC	NOTCH4 p.V342M	0.1437894057343871	0.32596653313241636	0.15632808207281537	0.28560361175012466
IGF1_3	AGTCAGCTCGCTCTGTCCG	IGF1 p.R119C	-0.00912777	0.927537	0.15625571858267256	0.1190581258687192
PIK3CD_12	AGAAGGCGGTGGGTCCCAG	PIK3CD p.A414V	0.044479	0.7078398371793813	0.15622592699438187	0.1878299492771028
TP53_316	TTGCGGAGATTCTCTTCCT	TP53 p.R290H	0.0469326	0.7743495903868868	0.1561700826328678	0.3398666559852658
RB1_83	CATTCCTCGAAGCCCTTAC	RB1 p.R787*	0.21116537882953587	0.0481695	0.15606627724961536	0.14456572627982042
TP53_119	ACACCCCCGCCCGGCACCC	TP53 p.P151S	-0.137645	0.0833829	0.15594633167292674	0.0490402
STK11_15	CTACCAGCCGCGCCGCAAG	STK11 p.Q37*	0.0656501	0.43035446733546256	0.1558042782517206	0.0611565
FBXW7_48	TCTCGAGATGCCACTCTTA	FBXW7 p.R479*	0.00635155	0.9553477013136844	0.15570135389402182	0.16926074247288095
BAP1_3	TGCTGGCTCAGGAAGGTGA	BAP1 p.Q684*	0.20903242873361216	0.12610797744282462	0.15561287525312503	0.25512724955564364
AMER1_9	CCCGAGAGGTTCGTTGTAG	AMER1 p.R631*	0.16736372597000132	0.2699595755321779	0.15546895672513936	0.3056295922756742
BRD4_5	CGCTACTCCCTTCCGTGAA	BRD4 p.P946S	-0.0954008	0.3835113806821834	0.1554413234562114	0.1548819879941505
JAK1_1	CTCATTGTCGTTGGTTCCA	JAK1 p.D121N	0.3248841653903571	0.0446086	0.1554063786521172	0.3377227195550173
APC_27	AAGACGTTGCGAGAAGTTG	APC p.R564*	-0.00291	0.9846930422649512	0.1552596196439078	0.30549391539350484
PIK3CB_14	AATAATTCGTGTTTTCTTT	PIK3CB p.R321Q	-0.176827	0.28114171695040957	0.15514818111839618	0.3422025132923597
INPP4A_10	TTCCGTAAGTCCCTTCGGG	INPP4A p.G973R	0.1448757894116608	0.1381422790061229	0.15495982286405766	0.11279472535862511
CARD11_40	AGACGGGGGCTGACCCGGG	CARD11 p.R888H	0.040098	0.6281739573010358	0.1549042453179666	0.0611217
CDH1_11	CCTCAGGTCATAAACATCA	CDH1 p.Q610*	-0.0534204	0.7228193842658592	0.1547618755958761	0.3031671755920443
SDHD_6	CTGGAGTTCGAAGCAACAG	SDHD p.R22Q	0.2845487179213258	0.0385856	0.15430347090608257	0.2626992205599079
TP53_2	CTAAGCGAGGTAAGCAAGC	TP53 p.R306*	-0.0804458	0.46325773586719626	0.15429285068040385	0.15864447151554492
PTPRT_57	CCCGTGTGCGGCCCGAGGA	PTPRT p.R1207C	0.00768392	0.930189	0.15418788353002602	0.078438
FGFR2_15	CTGGTTTCGTACCTGAAAA	FGFR2 p.R210Q	0.14044528801075812	0.26436686556595185	0.15399118601383557	0.22106809881878775
NOTCH1_16	ATCGTGCCAGCAGGCTGAC	NOTCH1 p.S137L	0.21467984542955956	0.0503501	0.1537697469311626	0.16129302211985294
IL7R_14	CATCCTTTTCCTGGCGGTA	IL7R p.E172K	-0.140778	0.2618127457809003	0.15375957236632137	0.21926017758950195
FLT3_3	GCTTCGTACACTGTCCCTG	FLT3 p.E77K	0.13720990132022742	0.2271331428864697	0.15351031903045986	0.1766506169037009
STK11_31	TCCGGCAGCACAGGTGAGC	STK11 p.R304W	0.0376695	0.7451985893281322	0.15342842870816326	0.18533084176483752
CARD11_19	AGGAGCTGCGAGACAAGGT	CARD11 p.R337*	0.0682497	0.5632847141501887	0.15312417344173554	0.1943639037921681
CDKN2B_1	GGCGCGGAGCCCAACTGCG	CDKN2B p.A70V	0.0691065	0.5229198585314302	0.15307836087133062	0.15684777449824072
CTNNB1_32	ATTCGGAACAAAACAGCAG	CTNNB1 p.R661Q	-0.00307118	0.9872958946544343	0.15304	0.4269523819221286
PAX5_2	GGTGTGGCGACCTTTGGTT	PAX5 p.A91T	0.1861498055860526	0.0651147	0.15300232609941955	0.12976008128462363
CDKN1A_1	TCCGTCAGAACCCATGCGG	CDKN1A p.Q10*	0.0597844	0.5634282458748783	0.15298537962868913	0.13895113937294598
MSH2_2	ATTCGACAAACTGGGGTGA	MSH2 p.R680*	-0.0448517	0.6936405239665208	0.15278273130809278	0.17888275838902504
KMT2D_74	ACCATCATTCGGAACGAGG	KMT2D p.R5432W	-0.0671404	0.7212798863130143	0.1526499995098301	0.416498
FLT3_5	ACTTCTTCCAGGTCCAAGA	FLT3 p.W464*	0.2641534728031866	0.2024830291522008	0.15244867773264503	0.46240233790675295
DDR2_23	CGGTTCCGCCAAGAGATCC	DDR2 p.R133Q	0.11827939562047664	0.12996748898464705	0.1520801264777119	0.0515128
DAXX_10	TGGCTTCCTTGGCCCCAGT	DAXX p.S675F	0.1423819550570807	0.2546422647591567	0.15207955572650106	0.22377769009421905
MTOR_2	ACAGCTTCGAAGTTCATCA	MTOR p.E1799K	-0.00222461	0.990592	0.1519373298846615	0.4202319100987485
SMAD4_49	TGACCACGCGGTCTTTGTA	SMAD4 p.A406V	0.2898719124208434	0.00739742	0.1519222899752439	0.1609836443946508
IKBKE_8	TCCGGATTTCTGCCATTGG	IKBKE p.X29_splice	0.11635140687186382	0.21765048792352815	0.15181818672708405	0.1076428544683074
CARD11_8	CAAGCTGCGGCGCCTCTCC	CARD11 p.R436W	0.0732275	0.3339683653201578	0.15177162661796753	0.045164
EPHA5_1	TTCGGAAAGCTATTGCTTC	EPHA5 p.R853Q	-0.0317797	0.8309014586777611	0.1516800756787635	0.3071530651769377
PTPRD_2	CAGGTTCGCTGGGAGGCCC	PTPRD p.E406K	0.11525447741800274	0.18064401269832295	0.151633	0.0781428
PTEN_48	AGCTGGAAAGGGACGAACT	PTEN p.A126V	0.12590004947930403	0.29623	0.1514936229058109	0.20877994973289107
BLM_2	GCTGACTTCCTTGGATGTA	BLM p.S729F	0.15395776709865325	0.2617891726317013	0.15142021226830968	0.2698599671400773
EED_1	GACTTCGATAAAATACTTT	EED p.R441*	-0.251934	0.4159528045729285	0.15127733233588062	0.6237053278628963
WT1_5	TGGTTATCGCTCTCGTACC	WT1 p.D342N	0.15518817495529388	0.3019743321168814	0.1510853646445467	0.31508110540200757
CDH1_7	TCTGCCAGGAGCCGGAGCC	CDH1 p.Q23*	0.0366657	0.6679122319225562	0.15102994283851898	0.0769603
MAP3K13_4	CATGGATGGCGCCAGAGGT	MAP3K13 p.A321V	0.16258528434456296	0.12268079181040598	0.15093553800934145	0.15198441687473677
ARID2_29	CCTCAACAGTCGAATGCAG	ARID2 p.Q1043*	0.00616173	0.9598026548042832	0.1508134056545083	0.21683876614356315
TP63_30	CCTGGACGGTAAGAGCAGC	TP63 p.T193M	-0.093174	0.396885	0.15071412718726732	0.1696001396721586
ETV6_2	TTCCGGATAGTGGATCCCA	ETV6 p.R369W	0.20488727211524477	0.1582929637471616	0.15061344745967264	0.30010954190074873
MAP2K4_8	TCTCTCTGTTAAAATATTG	MAP2K4 p.X73_splice	-0.00504534	0.9840478746103716	0.1505622985029204	0.5500636652136666
PTPRD_52	GACGTATGATGCTCCCTTG	PTPRD p.V892I	-0.0223	0.8774035546065643	0.150324	0.29764363457050447
AR_8	GCGGCGGTCCGGCCAGAGC	AR p.G373R	0.1103580040199134	0.1592375947413889	0.1502666735975301	0.0551973
EGFR_15	ATCACGGCTCGTGCGTCCG	EGFR p.S306L	0.0419652	0.6524825734098352	0.15010666049659538	0.10700285195236042
RB1_104	TTATATTCAAAAGAAAAAG	RB1 p.Q93*	-0.137512	0.5196669737629058	0.14986880877902228	0.4813591219258812
ARAF_14	GTCCACTCCCAACGTCCAT	ARAF p.S214F	0.0454629	0.7224667603472529	0.14984798225881518	0.24137747762901487
ROS1_9	GGAAAGTTCCCTTGTACTA	ROS1 p.S819F	0.16767071102559408	0.313761	0.14971785217751438	0.3685661324669975
KDR_21	AGGATATTTCGTGCCGCCA	KDR p.R1032Q	0.0924283	0.4278102732496823	0.14950095764266483	0.1994912232284905
STK11_4	TGTCAGCTGATTGACGGCC	STK11 p.Q159*	0.1592259955211785	0.184994	0.14949421749049277	0.21346677507465903
BAP1_15	GGCGAAAGGTCTCTACCTT	BAP1 p.R60*	-0.0329376	0.8148665495336882	0.14949187237890144	0.28716092903145624
PIK3CG_28	GTGACGTCATAGCCAATCA	PIK3CG p.V162I	0.28268181330981074	0.0309854	0.1493555332846118	0.2550058035582314
XIAP_4	CACTTCGAATATTAAGATT	XIAP p.R238Q	-0.330114	0.34436102451602313	0.14921210653140288	0.6679650283806229
TP53_200	CCATGAGCGCTGCTCAGAT	TP53 p.R181C	0.0508083	0.5577200659597992	0.14916769707518204	0.0849794
ERBB3_20	GAACTGCACCAAGATCCTG	ERBB3 p.T355I	0.21673654972085585	0.0624446	0.14906493575884913	0.20056295204064145
IKZF1_28	GCGCGCGTGCGGGGCGATG	IKZF1 p.A422T	-0.104645	0.28290378656844567	0.14899879529122104	0.12540685414731909
NOTCH2_5	AACGCTCCCCAGCAAAGCC	NOTCH2 p.R1260H	-0.0248499	0.8040553725598547	0.14869230606916822	0.13724501414854456
NOTCH3_8	GGGCGGGGCAAGAAGCTGA	NOTCH3 p.R2080W	-0.129743	0.3396074704191207	0.1483873554381712	0.27201053884852455
NEGR1_11	TAATTTCCTGAATAGTAGG	NEGR1 p.E229K	0.2225659666699257	0.4578150615459441	0.14788932617495162	0.6220938311208517
H3F3C_10	CCGTGGCGCTTCGAGAGAT	H3F3C p.A47V	0.13300153041266233	0.21894422693750637	0.14766907498436466	0.1723155280632154
BRAF_7	GATTTCGATGATCTTCATC	BRAF p.R354Q	0.25163826383714355	0.1349203655212966	0.14747237588878054	0.3816133616490436
FOXA1_5	CCGGACTCCGGCAACATGT	FOXA1 p.S250F	0.29568210900306535	0.021933	0.14741335819955395	0.25380671719663456
TP53_255	GGCGCTGCCCCCACCATGA	TP53 p.R175C	-0.0537198	0.5790388844885292	0.1473965585844852	0.1273461291893928
PDGFRA_26	AGCACATTCGTAATCTCCA	PDGFRA p.E289K	-0.260717	0.10011126989184894	0.14739167657640168	0.3504670966380712
RNF43_22	GCGGGTGAGCGAGGAGCCA	RNF43 p.R132*	0.0828637	0.4888617903007391	0.14737979916161362	0.2180888201680141
PTEN_33	CCTCAGTTTGTGGTCTGCC	PTEN p.Q214*	0.10962842032423376	0.2584691675905303	0.1472870692659136	0.12889314745433475
TP53_33	ACACTTTTCGACATAGTGT	TP53 p.R213*	0.5095225199361508	0.00238284	0.1472829827839059	0.38166579400627915
ERBB4_46	TACGGGCTGCCAAATCCCG	ERBB4 p.R847H	0.0256667	0.8085128702181916	0.14728075008029284	0.1639749612884201
SMARCA4_20	AGGCGCGGCTTCCGCTTGG	SMARCA4 p.R1336H	-0.0285953	0.7280890149310457	0.14725682421391312	0.072997
PTPN11_24	GAAATTTGCCACTTTGGCT	PTPN11 p.A72V	0.15025931306013496	0.2955466984180869	0.1469460284493068	0.3064120279292892
EGFR_67	ACTCACATCGAGGATTTCC	EGFR p.D761N	-0.219441	0.13051971750856928	0.1467725593030337	0.31011496691754287
GRIN2A_77	CCAAACACGAGGCCGTGGA	GRIN2A p.V99M	-0.0992827	0.3778253894065241	0.14648849887548335	0.19230129217206593
EGFR_55	AGTTTCCTTCAAGATCCTC	EGFR p.E709K	-0.0560859	0.6929991425045197	0.14639678669542935	0.3020466037376115
INHBA_4	TGGCGCCACTCTCCTGGCA	INHBA p.A252T	0.0645996	0.5313097850141608	0.14612999285808698	0.15655768468069253
KEAP1_22	GAGACGATTGAGGACAGCC	KEAP1 p.R470H	0.0316564	0.7730597354013197	0.14611734427552267	0.18276729764538985
PTEN_73	TATGTGATCAAGAAATCGA	PTEN p.Q298*	-0.0911818	0.5561455874886689	0.14599	0.34473365347968216
CIC_13	GCCCGGTGCCGCTTGCTGA	CIC p.R215Q	-0.0832321	0.2310374948779489	0.14582570139981296	0.0354303
KMT2D_44	CAACAGCGGCGAGGGCGCA	KMT2D p.R1757*	0.0507708	0.5107975854354962	0.14581917041396286	0.0587555
RIT1_4	CTGCCCTCATATACTGGTC	RIT1 p.M90I	-0.132822	0.3253095272406963	0.1454291808141169	0.28039208158929046
LATS1_3	AGATCGCTTAGGCAAGAAT	LATS1 p.R995C	0.1693624559158145	0.3645923462629878	0.14536505429471797	0.4366379776328036
PIM1_14	GGGGCTCCTTCTCCTTGCC	PIM1 p.E32K	0.12561291938689195	0.18638474477867828	0.14534113913931893	0.12627470317887496
AKT3_9	GTTCGAGAGAAGGCAAGTG	AKT3 p.R166*	0.13773008082427243	0.34429487436138095	0.1451632692049368	0.31895731688686246
FOXA1_9	CGAAGCAGTCATTGAAGGA	FOXA1 p.D226N	-0.129818	0.4227341679113402	0.14503559490295842	0.3694749146147852
TCF7L2_36	AGAAGTGTCGGGCACTGTT	TCF7L2 p.R448W	0.0736266	0.5637072090333204	0.1449706379880806	0.2554243387401957
KMT2D_45	ACAGCGGCGAGGGCGCAAG	KMT2D p.R1757*	0.11930388462967892	0.18359367315522987	0.14477514566580485	0.10658370375256676
IKBKE_5	GGATTTCTGCCATTGGGGA	IKBKE p.X29_splice	0.3161318903810088	0.0409146	0.14459650707385222	0.3507534519398116
EGFR_37	GCCGCAAATTCCGAGACGA	EGFR p.R252C	0.14566818772720422	0.25843273213754797	0.14449403191914717	0.2623628190535451
TET2_2	GCTTCCTTCAGAAGGAAAA	TET2 p.P419S	-0.0331023	0.8039298492500101	0.1444736969133921	0.2778365534655108
PIK3CG_10	GGCGGACTTCTACCACCGG	PIK3CG p.A85V	0.0961731	0.2745421782884133	0.14432212068865966	0.10096562662031626
KMT2C_17	AACTCCACGACCTGTTGTA	KMT2C p.R2139*	0.17731651500918386	0.15878074251190366	0.1441698721211238	0.2521401743421395
FLT1_14	CTACGGTTTCAAGCACCTG	FLT1 p.V347I	0.0804656	0.7818822663280565	0.14384193200713985	0.6206242616034024
ARID1A_87	TCAGTGACCGAAAGAACCC	ARID1A p.R2158*	0.2291337518712834	0.0828288	0.14342493953016242	0.27812306029823203
TP53_164	GACTGTAGATGGGTGAAAA	TP53 p.X33_splice	0.16734227672195956	0.29372724255336774	0.14337573182790053	0.36853321864065935
CDKN2A_112	ACACGCTGGTGGTGCTGCA	CDKN2A p.T93M	0.0241356	0.8132301974083146	0.14333161635498312	0.1602068542508549
STK11_10	GTTCTCCATCCGGCAGATC	STK11 p.S299F	0.2303161448680772	0.0530084	0.14325573383836948	0.2292628467962812
ERBB2_18	ATGCCAACCACCGCAGAGA	ERBB2 p.G660D	-0.0558893	0.5047135537643811	0.1432401782438598	0.0865765
TET2_6	TGTTTGGTGCGGGAGCGAG	TET2 p.R1214W	0.17613818462301548	0.1882592274537425	0.14318705206735624	0.28501766591377364
ERBB2_8	GCTGCCGTCGCTTGATGAG	ERBB2 p.R678Q	0.0767318	0.455481	0.14316685425924913	0.16362605343332923
BRD4_3	CTACTCCCTTCCGTGAAGG	BRD4 p.P946S	0.0264805	0.8530699940449423	0.14314781434536203	0.3164453168592751
MED12_3	GCTGTTCTCAAGGCTGTGT	MED12 p.L1224F	-0.00464946	0.9729985308035684	0.14295784415222315	0.2974002510695452
DDR2_17	AAACAGTTTCGTGTGGCCA	DDR2 p.R714Q	0.21174000129839607	0.0791903	0.14291975715078972	0.23644657337773545
APC_78	GAAAAGTTCGATCTAATTC	APC p.R2204*	-0.313468	0.14420020347047324	0.1426664345346168	0.5047125715967282
EGFR_46	GCCGAACGCACCGGAGCCC	EGFR p.G724S	0.0232988	0.7824162938804003	0.14260490292503172	0.0906522
AXL_17	ATCGTTTGACAGCACAGCC	AXL p.D267N	0.17780760746462557	0.2015241492400343	0.14247352672978122	0.30631261873365573
TP53_3	TAAGCGAGGTAAGCAAGCA	TP53 p.R306*	-0.013328	0.9307112367479164	0.14242087745709328	0.35222456059986773
SMO_7	ACTCCCGCACCAACCTGAT	SMO p.R772C	-0.0258159	0.8165338370285274	0.14212835186102593	0.2008323091404738
ERBB3_21	CACCAAGATCCTGGGCAAC	ERBB3 p.T355I	-0.0884619	0.46771921314311216	0.14196314218940514	0.24308466672119236
FLCN_1	GCTCCGACCGAGGATACCT	FLCN p.P278L	-0.0250445	0.8494007417149031	0.14181443711501232	0.2816400782967006
FUBP1_5	TGAACACTTCGAAGAAGGT	FUBP1 p.R344Q	-0.143278	0.38678674751547915	0.14175734503209453	0.39052004924118694
GRIN2A_80	CCCAAACACGAGGCCGTGG	GRIN2A p.V99M	0.0227688	0.8425748904959752	0.14170023868838807	0.216086
GRIN2A_45	ATTCCTCTTGGATCATGAA	GRIN2A p.E657K	-0.232545	0.26052507664805363	0.14168225719084027	0.4912300418242818
PTPRT_95	ACGCGGTGACCCGCTGCCA	PTPRT p.A413V	0.011518	0.878675	0.14126948485465474	0.0609634
CARD11_23	TGTGGCCGCCAAGGTGAGG	CARD11 p.A1046V	0.0661142	0.546872	0.1411782059092042	0.19806027971885107
NF1_29	CCCGAGCCAGGAAATCCAT	NF1 p.R2517*	0.2278502817692448	0.0779304	0.14113160165159647	0.27546443108611873
PTPRT_43	TTCCTTTGATGAGCACTAC	PTPRT p.S33F	0.3121358248209968	0.0341645	0.14096845286252763	0.33982797573268464
PTPRT_92	GGAATATCGCACCACCACA	PTPRT p.R328C	-0.154681	0.2076373125663804	0.14083377800520072	0.2495374825024993
HLA-B_2	AGCGGGGCTCCCCGCGGCC	HLA-B p.R45H	0.0624463	0.3795390212524404	0.14055600725080775	0.0478364
ALK_5	CTCCCCCCGCCATGAGCTC	ALK p.G1202R	-0.0483367	0.6497410289821786	0.14053850572051188	0.18596662030555017
PIK3R2_8	TTGTTCCCGCCTTTCCTGG	PIK3R2 p.G373R	0.0477536	0.5132607858958078	0.14048529910389335	0.054239
APC_66	CGTAGTAAGCAGAGACACA	APC p.Q789*	0.15173201422129565	0.35650347020339485	0.14047583511628792	0.393451
FAT1_24	AGAAATTTCGTCTTGATCC	FAT1 p.R1506C	-0.135572	0.3697896737720741	0.14041798120241628	0.35190167720015914
KMT2C_32	AGAACCAATCGAGAAACTG	KMT2C p.R2884*	-0.00352296	0.9840252595061472	0.14033610585604392	0.4246732913141963
SMAD3_18	AGGCAGAAGCGCTCCGAAT	SMAD3 p.R268H	0.0235708	0.8605588347831217	0.14001528969248864	0.29650503490016794
SMAD4_30	ATCCATCAACAGTAACAAT	SMAD4 p.G352R	-0.0780752	0.6974195746438694	0.13946034709413263	0.48619140009868506
MYCL_4	ACCTGCGTTCGCGATTCTT	MYCL p.S329L	0.15137651784857142	0.14416610864709478	0.13931073568146596	0.1790446672203251
FLT4_1	GGAGGGCGGTGACCACGCA	FLT4 p.A491V	0.0792779	0.4821115929885823	0.13918426291857303	0.21707333003878032
SMAD3_24	AGCTGACACGGAGACACAT	SMAD3 p.R287W	0.12159311123144236	0.41219348016026985	0.1391134272196359	0.3481747419972751
BRAF_9	TTTCGATGATCTTCATCTG	BRAF p.R354Q	0.25232507071941873	0.1401179842898548	0.13896011322254231	0.4170259021962226
PAX5_6	CGATTTTTTCCACCACTTT	PAX5 p.E97K	0.16734137328181853	0.23873869369026984	0.13888485063057265	0.32844290403343507
NF2_13	CTGCCCTCCTGAGGCTTCT	NF2 p.P135L	0.0766439	0.455852	0.13874328355907736	0.1768736630372425
ZFHX3_15	TTCGTTGGGTGCAGAAGAG	ZFHX3 p.E2873K	-0.0760789	0.6535269769633512	0.13852572620221745	0.41299933115382387
NF1_27	TCTCTTCCGAGGCAACAGC	NF1 p.R1276*	0.0315507	0.7468625734513273	0.1383285289950603	0.1565637378477083
RB1_94	GTTCACCTCGAACACCCAG	RB1 p.R251*	-0.155697	0.1334242705382613	0.13824442412783697	0.1813424571233055
TSC2_11	GCTGGGCGGAGATCCTGGT	TSC2 p.A1195V	-0.0850825	0.4868142154953203	0.13797778530262192	0.2584859155883224
NF1_11	CTTACCGGTGCCATTCGTA	NF1 p.X464_splice	-0.00440529	0.96587	0.13783498974793604	0.1801112372048517
APC_88	TCGCGAACTTTGCTAGCTA	APC p.R332*	-0.0961995	0.498247	0.1377205067827556	0.33121950732037275
TET2_7	GAGCAAACACGAGATCTTG	TET2 p.R550*	0.0930293	0.5501864068080617	0.13771208402139426	0.3763348955715076
NOTCH1_25	GTGGCGTCGTTCTGGCACG	NOTCH1 p.A465T	0.0974641	0.3095051754202886	0.1377025233481371	0.15088932433054977
SMARCA4_9	GCTGCTGACGGGCACACCG	SMARCA4 p.T910M	0.18859605134373536	0.0368333	0.13748071248356722	0.12835593236194934
DICER1_6	ATCTCCCAGGAATTCTAAG	DICER1 p.D1709N	-0.0761483	0.6432861202711139	0.1374749059244635	0.4021229233677357
PIK3CA_69	CCTCACGGAGGCATTCTAA	PIK3CA p.R38H	0.14780089992274326	0.33305657373050007	0.13741679161556472	0.368311
NUP93_4	AGCTGTTCAGCTTGCTGAA	NUP93 p.E14K	0.2460425672707287	0.0239996	0.1371522452459517	0.20906181528965448
KMT2C_38	GATTCGTAAACAACAGAAA	KMT2C p.R3252C	-0.0636021	0.7462915915097116	0.1370929219565645	0.4847151798262653
MAP2K4_9	TCTCTGTTAAAATATTGGG	MAP2K4 p.X73_splice	0.0836136	0.7394538508581678	0.13698896202514008	0.5856949506449682
APC_121	TTTTCCTTACAAACAGATA	APC p.S179F	0.0858509	0.677408	0.13698270107679275	0.5067311309363345
TP63_2	CGTTTCGTCAGAACACACA	TP63 p.R379C	0.16878889891049428	0.2152899400624807	0.13681353205762783	0.31551400236777827
CDKN2A_113	CCTGGACACGCTGGTGGTG	CDKN2A p.T93M	0.10027717403790096	0.28609282123660784	0.13675515532441798	0.1456789412959302
RET_9	GACGGCTGGAGTGTGAGGA	RET p.R525W	-0.042682	0.7488962201206536	0.1365399306358258	0.30522810081919594
MYC_5	AGCTCGTCTCAGAGAAGCT	MYC p.S161L	0.0125517	0.9198267330254084	0.13649963176445917	0.2732293231525594
EPHA3_26	CCGGAATCCCGGCAGCCTG	EPHA3 p.P885S	0.0173327	0.8151270343948194	0.1363624874557508	0.0655134
ARID1A_63	GCCTTCAGTCAAGACCCTC	ARID1A p.Q633*	-0.141625	0.23761746631347097	0.13618178835239747	0.2550906412000141
IKZF1_47	TGTGGCCGAAGCTATAAAC	IKZF1 p.R208*	-0.0474233	0.8001881904031831	0.13613050617084546	0.4667666767963297
MLH1_1	TTCGAGGTGAGGTAAGCTA	MLH1 p.R100*	0.15106105867841246	0.324417	0.1359822232898732	0.37520867802838065
EPHA3_5	GTGAAATTTCGAGAGCATC	EPHA3 p.R136*	0.0837889	0.6717861288762303	0.1359142134544208	0.4917973525767523
PTEN_26	CCCTGGTGGACAGAAAAAA	PTEN p.X165_splice	0.0604061	0.723744	0.1359122805397491	0.426199
PDGFRA_15	CATTCCTCGGGCAACTTGA	PDGFRA p.R804Q	0.038171	0.7704559195409534	0.13574466178091274	0.2991601592562471
RB1_92	ACCTCGAACACCCAGGCGA	RB1 p.R251*	0.0843616	0.4886440123576749	0.13558697545321063	0.2655954557294409
TP53_235	TTTCCTTCCACTCGGATAA	TP53 p.G199E	0.10042917754069527	0.4006665452628514	0.13557911213656884	0.2564643668333426
FOXP1_11	ATTCTGCAGCAAGTATAAA	FOXP1 p.X511_splice	0.1313789827907246	0.3750562648912705	0.13533144799254862	0.36094660612516993
KMT2A_8	TTTTCGCCACTCCATTCTG	KMT2A p.S680L	0.0156475	0.8658036812538683	0.13531656923297097	0.1435636028406461
TP53_69	GCACGGTCAGTTGCCCTGA	TP53 p.T125M	0.0783098	0.4620647173845802	0.1352851913996098	0.2037936706001545
NF1_61	TTTGGACCAGGCAAGCATG	NF1 p.Q1070*	0.2036983842241402	0.14950943204566058	0.1351652524986385	0.33933724917204666
ZFHX3_12	CTTCGTTGGGTGCAGAAGA	ZFHX3 p.E2873K	0.0683743	0.6697265074079004	0.13516148315804166	0.3989768184378021
PIK3CA_73	AGAAAATCTTTCTCCTGCT	PIK3CA p.D549N	0.16441688761389373	0.34584269639929616	0.13511047644904828	0.4387309299553865
HIST3H3_4	TCTCGCGCATCAGCCGCTG	HIST3H3 p.E74K	0.0254302	0.7499587387547291	0.13494788093538063	0.0904973
SMAD3_9	TGTCTCCGTGTCAGCTCCA	SMAD3 p.R287Q	0.20619351167740144	0.06763	0.13489377233142938	0.23239732234697116
SPOP_3	CCCGTTGACTCTCTGGGGT	SPOP p.R121Q	-0.170093	0.10232701412269568	0.1347918901968101	0.19402295165302488
LATS1_9	AAGAAATTCGGGAATCCCT	LATS1 p.R35W	-0.108839	0.5701810514502642	0.13477914019818735	0.4809513215421233
KMT2D_99	AGCACACCAATGGTGAGCC	KMT2D p.W141*	-0.000401384	0.9976082212737925	0.13476936146106178	0.31372205537707626
TP53_283	ATTGAACAATGGTTCACTG	TP53 p.Q52*	0.0297528	0.8733327185040096	0.1347001041652069	0.4700284077166235
KDM5C_3	TCTACGAAAGGCCCTGCTG	KDM5C p.R681*	-0.0866244	0.47233529287175174	0.13461011205678833	0.26337133497608833
ASXL2_5	TGAGAATTCGACAAGAGAT	ASXL2 p.R357*	-0.0280218	0.8346171050759026	0.1345966263869459	0.315095
SMAD4_5	AACAAAAGCGATCTCCTCC	SMAD4 p.R361H	0.12802922112329743	0.24976983069126765	0.13429965496464427	0.22738744034494351
TGFBR2_26	TAGACATCGGTCTGCTTGA	TGFBR2 p.D471N	0.24112257007751975	0.0903356	0.1341442351831783	0.3465882644708963
PTPRS_42	ACGTTCCGACCCACGGGCA	PTPRS p.R295Q	-0.0305131	0.7698239048936896	0.1340527776380623	0.1980763188454667
PTPRT_109	GAGAACGGAACTCACACAC	PTPRT p.R1176H	-0.0162266	0.9115446657655052	0.1338346547008574	0.35907937540737184
STK11_25	CGGACCAGCCAGGGCTCCC	STK11 p.Q214*	0.071472	0.3414704470870598	0.13381218656188676	0.0748178
FBXW7_6	TACAACGCACAGTGGAAGT	FBXW7 p.R465H	-0.0368155	0.8486452047480626	0.13371437430106428	0.4877848068549528
BCL6_2	AATTCGAGTGTGGGTTTTC	BCL6 p.R594Q	-0.0299993	0.8179949838344509	0.1335402749322666	0.3050873937312698
TSC1_7	TTTTACCGAGACAGTCTCC	TSC1 p.R509*	0.0361052	0.8212753892734381	0.13336148203794748	0.4038798634536841
ARID2_16	CTTTCCTTTGAGGAGGGCA	ARID2 p.S297F	-0.115775	0.4718032761875792	0.13318543138685393	0.40689965576095566
EPHA5_12	GCAAATTCGTGGACAGCTT	EPHA5 p.E665K	0.0689436	0.6181933132579573	0.13314113626404153	0.3355345036378326
CIC_22	AGACTGGCGCGTCCCTGGG	CIC p.R1277C	0.1656456578046385	0.0726611	0.1329942398971471	0.14971782516246207
RBM10_17	GGAGGAGCAGGAGCGTGGG	RBM10 p.Q664*	-0.0328179	0.7798	0.1328887327332001	0.25691060735803034
PAK5_30	TATCTGGCCCGTCCAACTT	PAK5 p.P14L	0.0510659	0.6222852720895301	0.132771	0.1999980742922098
TP53_144	CGGTTCATGCCGCCCATGC	TP53 p.G245D	0.0890171	0.3464175682622593	0.1327093799276077	0.16033642612664217
JUN_1	GCCCTCGGCGAAGCCCTCC	JUN p.E112K	0.0791926	0.3125522928919549	0.1326239254950981	0.0906493
ERBB4_33	CAGCTTTTCCCAAGGTGTT	ERBB4 p.G1217E	0.21862304574395697	0.12617664789839134	0.13257906295699548	0.35409498099089287
IDH2_3	TGGGCGTGCCTGCCAATGG	IDH2 p.R172K	0.0975236	0.31147725909251034	0.13247010081086483	0.16909418079688152
KDM6A_16	ACTCAGGTAATAGGAGGAC	KDM6A p.Q641*	0.2725391658191098	0.26504043575659064	0.13244246519843716	0.5885134363370172
GLI1_14	AGCAGGACGGTCAGCAGCC	GLI1 p.R648H	0.00745925	0.9299076375773676	0.13242535978573966	0.11809743603754971
PTEN_36	TCGTCCCTTTCCAGCTTTA	PTEN p.G129R	-0.00451451	0.9725854592465962	0.13237248748933095	0.313013
KEAP1_7	GGCCGCTCCGCGGCACCTG	KEAP1 p.R362Q	0.26073231677275877	0.00264107	0.13220943473132432	0.12804088631929647
TP53_176	ACAGGGGCCAGGAGGGGGC	TP53 p.W91*	0.0912252	0.3016683840994345	0.13209080454820682	0.13469783721019132
PPP2R1A_9	CGGCGGGCCGCAGCCTCCA	PPP2R1A p.R183W	0.00894016	0.903203	0.13207914910836427	0.0721317
AR_14	CCTCAGGGGCTGGCGGGCC	AR p.Q488*	-0.038727	0.6073846699089906	0.13199222890169934	0.0795319
FOXO1_1	AATTCAATTCGTCATAATC	FOXO1 p.R214C	-0.0142838	0.9503748160049916	0.13154473615771434	0.5661091603165673
AXL_15	GGATTTCGTCAGGCTCCTG	AXL p.E818K	-0.054738	0.5963188792102166	0.13142946658415772	0.2026771541746396
MGA_18	CGGCGGCGTGGTGAAATGA	MGA p.R2435W	-0.214704	0.0823004	0.1313721252905634	0.28561559249169033
TP53_63	CCTCCGGTTCATGCCGCCC	TP53 p.R248Q	0.13593936594159645	0.0611841	0.13116272808036772	0.0709521
FGFR1_4	GCAGCTTCGCTGTCGGCTG	FGFR1 p.R87C	0.039492	0.5600556711252598	0.13112962990529137	0.0527991
ARID1B_4	GCGCGGCCGCCGGGGCCGC	ARID1B p.G246S	0.0647108	0.317794	0.1311259495448318	0.0428355
H3F3A_1	TCTTCACCCCTCCAGTAGA	H3F3A p.G35R	-0.0191269	0.8933268149284499	0.13110318245339453	0.3574720600944588
CDKN2A_52	TCCTACCTGGTCTTCTAGG	CDKN2A p.G106S	-0.167593	0.16134258075109986	0.1304596632668842	0.2739204934355527
RB1_54	CCTACCTCCTGAACAGCAT	RB1 p.X737_splice	0.15423499624091505	0.11423466544005612	0.1304408731912769	0.18186234165366932
TP53_207	TTCTCTTCCTCTGTGCGCC	TP53 p.E286K	0.28523979439483665	0.0169618	0.1303458521720354	0.27591193308326406
EIF1AX_13	TTTACCTCCTTTACCTGAT	EIF1AX p.G8R	-0.181786	0.2188395228160201	0.130267	0.37738197622654135
NF1_88	TCCAGGATATATCCAAAGA	NF1 p.Q282*	0.37053130884238666	0.0631588	0.13022938116252053	0.5149031464451167
TP53_178	GGGGCCAGGAGGGGGCTGG	TP53 p.W91*	0.00586247	0.9657735412343088	0.13010657395036762	0.34026905266050017
TP53_253	AGGCGCTGCCCCCACCATG	TP53 p.R175C	-0.106738	0.3774215475660356	0.13006553757955716	0.28143181541641266
MGA_21	CAATGAGCGGCGGCGGCGT	MGA p.R2433W	0.0631513	0.4231861491094752	0.13002312767250004	0.0990194
IKZF1_39	GGGCTTTCCTTCCCTGATG	IKZF1 p.E16K	0.15795139673014746	0.24783787990943928	0.12983020138652354	0.34240733905249654
FLT4_11	TCCCGAAATCGCTGGATGC	FLT4 p.R318Q	0.1358858816878482	0.18370638295225017	0.12962257416353368	0.2048755612787146
EIF1AX_9	TGCCCAAGAATAAAGGTAA	EIF1AX p.P2L	-0.028212	0.905159	0.12937229556462654	0.5843607594434166
ERBB3_11	AGTGTGCCGGGGGCTGCTC	ERBB3 p.A232V	-0.0388764	0.6566492780578518	0.129267	0.13889050437356615
SMARCB1_17	GATGAGGCGTCTTGCCAAC	SMARCB1 p.R377C	0.19271528457139445	0.0448974	0.12922649377710035	0.1789489405873871
NFE2L2_17	GGTTTCTTCGGCTACGTTT	NFE2L2 p.S137L	0.24060764871903476	0.18422670904421165	0.1290658589747222	0.4767345602386071
GRIN2A_76	CCCCAAACACGAGGCCGTG	GRIN2A p.V99M	0.2598976914955505	0.0126984	0.12900543470287182	0.21688924347730015
MAP2K4_17	GCATCACGACAAGGATATG	MAP2K4 p.R281*	-0.208315	0.11726164783311482	0.12900318278712733	0.33047422908259394
PIK3R1_12	GAAAAACTTCGAGATACAG	PIK3R1 p.R348*	0.0779473	0.6821852669368559	0.12872267612901167	0.49878
PTPRT_106	CTCACCTCCTTTTGATGGT	PTPRT p.R789K	-0.126297	0.34599260789099995	0.12845450232018155	0.33670095635919967
SMAD4_4	AAACAAAAGCGATCTCCTC	SMAD4 p.R361H	-0.0320602	0.8417712597655685	0.12838861280490577	0.4234258840645658
AXIN2_10	TGCGATGCATTTCTCTCTG	AXIN2 p.R339H	0.2174457897750414	0.19773006892464448	0.12836546077580407	0.4473513759595584
TET1_3	AATTCATGCGTGCTGCTCC	TET1 p.R81H	0.10151608717329284	0.3482630129636342	0.12824472503456985	0.23601886767585292
MYCN_5	CTCACGCTCAGGGACCACG	MYCN p.T403M	0.10858686001973632	0.28516825294614523	0.12824160013672112	0.2068743510432584
TERT_10	TCTTCGGCGGGTCTGGCAG	TERT p.E280K	-0.0610114	0.5816238670590012	0.12821798534436638	0.2461348504336434
ETV6_12	CCCGGCTGAGAGAGCTCAG	ETV6 p.P214L	-0.0573071	0.6626201546112982	0.12818188787615883	0.3284767296757193
CHEK2_10	GCTCGATTATGGGCCCTTC	CHEK2 p.R95*	0.11229946342891312	0.3950203120646667	0.12813837144153883	0.33182382482853234
CARD11_18	GAGGAGCTGCGAGACAAGG	CARD11 p.R337*	0.0151589	0.9071293995590242	0.1280326132609195	0.3240833842061699
CDKN2A_22	TGCACGACGCTGCCCGGGA	CDKN2A p.H83Y	-0.00931043	0.9336415910583852	0.12787947113731166	0.2524762404998716
RB1_26	TTGTAGCGATACAAACTTG	RB1 p.R445*	-0.203258	0.34655557925942854	0.12786559348823193	0.5526923249000865
TP53_97	AGATGTTCCGAGAGCTGAA	TP53 p.R342*	-0.229762	0.20798885996862873	0.12779052510361166	0.4823968674914585
SOX17_22	ATCGGGGCGGCGAAGAAAG	SOX17 p.A239T	-0.130008	0.24001352940086276	0.12753065386117524	0.24794549201417548
TP53_40	GGCAGCGCCTCACAACCTC	TP53 p.R175H	-0.0154162	0.8537374925232555	0.12751503003725032	0.12683702371360372
ARID1A_3	TTCCGACGATGCCTGATTG	ARID1A p.R1722*	0.19013839264700577	0.1774289762952766	0.12744751004878732	0.36624131943039434
STK19_7	GGTCTTCCGGCGCAGAGCA	STK19 p.D89N	-0.00915498	0.9288806651659792	0.12731951244972003	0.2138874675808755
RB1_35	ATGGCTTACGTTAAAATAG	RB1 p.X405_splice	-0.14819	0.6443453494408065	0.12731790237536342	0.6910566328013938
BCL2L11_5	TTGCGGCGTATTGGAGACG	BCL2L11 p.R153W	0.0509762	0.7128710889823768	0.1269843267332208	0.3589731463189442
CDH1_3	AGCAGTACATTCTACACGT	CDH1 p.Q449*	0.1900557846931212	0.33112207792369786	0.12694255256757972	0.51652
PIK3C2G_7	ATTTCATTGTAAGTGGGGT	PIK3C2G p.E1394K	0.15994173265474534	0.47286581661276206	0.1268563550148653	0.5693170526780842
IKZF1_40	GGCTTTCCTTCCCTGATGA	IKZF1 p.E16K	0.1813048086494367	0.25083449908741207	0.12676612153722072	0.4223517013990297
ATM_30	GTAGCTGAACGTGTCTTAA	ATM p.R3008C	-0.00835906	0.9608317117987112	0.12674871813332186	0.4559207372701261
TP53_103	GTTCATGCCGCCCATGCAG	TP53 p.G245S	0.19527132402378164	0.13342210945846186	0.12640040781070097	0.33163340642645484
TCF7L2_33	GTGCGTTCGCTACATACAA	TCF7L2 p.R471C	-0.211803	0.16191652751806446	0.1263520557633724	0.4027036281115211
FAT1_7	ATTAGATCGAAGTAACCAA	FAT1 p.R1627*	-0.249228	0.22209286763287303	0.12632698479633023	0.5345198162430255
ETV6_5	ATTTCATATACACCTCCAG	ETV6 p.S16L	0.3078097791561231	0.0702913	0.126251	0.4586878769829328
ERBB3_31	GGGGCCCATCTCGAAAATG	ERBB3 p.D581N	0.2450615333024049	0.28960721522554617	0.12622065865858034	0.5859081550333708
TCF7L2_24	GGTCCGCGCGGGATAACTA	TCF7L2 p.R420W	0.1806421040062149	0.15277775540112443	0.12618461700065137	0.3182581991461708
SMAD4_65	CCCTCCAGCTCCTAGACGA	SMAD4 p.Q534*	0.00399373	0.972288	0.12605588188422165	0.2725292018931099
IKZF1_22	CTTCGCTGTTTATAGCTTC	IKZF1 p.R213Q	0.1175723722255568	0.5271883808029227	0.12604757124528462	0.4978983627206734
PTPN11_14	CAATTCCAGCACTGCGGGC	PTPN11 p.A461T	0.17916694718121934	0.024641	0.12588160387496228	0.11470125860257284
ASXL1_7	CTCAGAGCTGGGTGTCTCG	ASXL1 p.Q1063*	-0.0256749	0.8101743877091055	0.12577962242105628	0.23893532226650943
PIK3C2G_12	ATCGCTTCTACTGCAATAA	PIK3C2G p.R681C	-0.136704	0.40067080330453786	0.1257159278074203	0.43887546748062384
KMT2A_12	GAGTCGAGAAGACAGTCCA	KMT2A p.R1858*	0.0819885	0.6320945510684313	0.1256488169450314	0.46299883161884386
HRAS_6	ATGGGGAGACGTGCCTGTT	HRAS p.T50M	0.0928571	0.46075526882065926	0.12557361414365828	0.318493
TGFBR2_29	CCGGGCGAGGGAGCTGCCC	TGFBR2 p.A380T	-0.0671278	0.2991716477822531	0.12541432546405454	0.0520444
PRKCI_1	ATTCGCATACCACGTTCTC	PRKCI p.R480C	0.1304997558395386	0.34594696387754287	0.12524216218749828	0.3658411936626193
STK11_47	AGCCGCCCGAGATTGCCAA	STK11 p.P221L	-0.0344303	0.7039407870303527	0.1252348932475121	0.16643007158922934
TCF7L2_21	CCGCGCGGGATAACTATGT	TCF7L2 p.R420W	0.0989152	0.4877173310116368	0.12520017536819175	0.3797500617411423
HIST1H3E_1	TGGCGCTGCAGGAGGCCTG	HIST1H3E p.A92V	-0.0172195	0.8676058617705993	0.12513441151502178	0.22517745602885816
TP53_181	GCGCCGGTCTCTCCCAGGA	TP53 p.D281N	-0.0667266	0.3914825109494564	0.12501197180582585	0.10765386530936062
ERBB3_7	TTCCCTCACAGGCTGCAAA	ERBB3 p.E332K	-0.118093	0.19039762415706937	0.12496377621041044	0.1648756943313499
APC_9	TGTTCAGGAGACCCCACTC	APC p.Q1378*	-0.00836488	0.930983	0.12491315940210015	0.19535526584120877
AXIN2_8	ACTGCGATGCATTTCTCTC	AXIN2 p.R339H	0.0917428	0.429503	0.1248208616534176	0.2823537314658033
MYCN_6	TCTCACGCTCAGGGACCAC	MYCN p.T403M	-0.159303	0.13154661111198204	0.12479715251647792	0.23590575479803297
CARD11_28	AGCTGTGGCCGCCAAGGTG	CARD11 p.A1046V	-0.0327446	0.6980258290075206	0.12479622628833238	0.1385219624148081
KEAP1_14	TCAATCGTCTCCTTTATGC	KEAP1 p.R470C	-0.014796	0.9204693192356644	0.1247663735413987	0.39935978159449487
ATM_62	ATCGAACAGAGGCTGCAAA	ATM p.R2598*	0.10363581189878682	0.3595757172805812	0.12439710608608112	0.27145890632717284
IKZF1_42	TTTCTTGGTAAGAGTTAAA	IKZF1 p.L283F	-0.0157077	0.9588579013106168	0.12419234703573008	0.68307
TP53_284	TTGAACAATGGTTCACTGA	TP53 p.Q52*	0.5299038122253679	3.4819270424054564e-4	0.12405746724279867	0.4044418439231502
TP53_38	TATCCGAGTGGAAGGAAAT	TP53 p.R196*	-0.145779	0.4377540299002384	0.12403204874632456	0.5081416583255451
ARID2_3	TTCGTTTCCTATTACTTTC	ARID2 p.R314C	0.1363045102105983	0.4466524731107925	0.1239940867816012	0.4889029856549066
ATRX_16	AGGCGACGTATTAAGGTTC	ATRX p.R1426*	-0.129345	0.5209213637144539	0.12382486062921376	0.5380163286040163
ARID1B_5	CGGCCGCCGGGGCCGCCGC	ARID1B p.G246S	0.2022288591595708	0.006049	0.1235158743328704	0.0939144
DNMT3B_1	CATGGCGGGCCACCAGGAG	DNMT3B p.A241T	0.0334284	0.779202	0.12344394898649254	0.3003201702181047
BLM_15	GAAGTTTCCTTCTGTTCCG	BLM p.P822S	-0.119057	0.29326724705428525	0.12340827969470096	0.2748458475124115
MGA_13	ATGAGCGGCGGCGGCGTGG	MGA p.R2434W	0.0622324	0.5552672325727557	0.12325966954205336	0.2425456519860321
ZFHX3_5	AGAAGCACCCGGAGCCGGG	ZFHX3 p.P695L	0.10451887643206326	0.17205809055813542	0.12290524780466738	0.10831854425800252
TP53_268	GACGGAACAGCTTTGAGGT	TP53 p.R267W	-0.00524375	0.9692622316325352	0.12273847849569566	0.36648483747132593
ZFHX3_24	GGCCGACGCGGTGCTCTCC	ZFHX3 p.A66T	0.10062118115259155	0.1914509158059622	0.12273806710535357	0.1110631979553175
PTEN_12	CACATAGCGCCTCTGACTG	PTEN p.R173H	-0.114426	0.33005852071425773	0.1227159278544178	0.29550234363234584
TP63_33	CCACCTGGACGGTAAGAGC	TP63 p.T193M	0.0173157	0.8938131471932678	0.12257307513400106	0.344502
APC_49	ATCAAAGTACAACTTATCC	APC p.Q1071*	-0.127887	0.5120656757380392	0.12237936765654826	0.5293008331214375
ERBB4_25	TTTTCCTCCAAAGGTCATC	ERBB4 p.G918E	-0.0726569	0.5051117560594427	0.12230803168307557	0.2609353203146323
BRAF_1	TGGTGCGTTTCCTGTCCAC	BRAF p.A762V	-0.0276939	0.8056019446689349	0.12226468325647728	0.2764433018782113
PTEN_14	AGCGCCTCTGACTGGGAAT	PTEN p.R173H	-0.125558	0.2816766363790025	0.12225	0.2935912825461335
PIK3CA_22	CAAATCTTCTAATCCATGA	PIK3CA p.E453K	0.23142870979938976	0.18221826835863375	0.12207742736677991	0.4820832692037133
MDM4_1	CCATTTCGGCTCCTGTCGT	MDM4 p.S367L	0.0830956	0.36367587757277026	0.12184719828738012	0.18279360087699725
PTPRT_100	CATTCCATTGCTGCAGAAC	PTPRT p.W230*	-0.024872	0.8335849573711873	0.12158894308044164	0.30370144047926667
RECQL4_4	GCGGATGTCGCAGCGGACC	RECQL4 p.D1142N	0.00937632	0.9242135202463276	0.12149564776267864	0.217076
BRAF_14	AAGGATTTCGTGGTGATGG	BRAF p.R389C	-0.0836597	0.6186623074307469	0.12102693659687418	0.4707580936766221
ARID1A_19	CTCTCAGCCTCCATACTCC	ARID1A p.Q515*	7.206124023818477e-4	0.9955704762869856	0.120729	0.3519158327958049
SMARCA4_73	CCACAGGGTCGAGGCCCCG	SMARCA4 p.D362N	-0.0201696	0.7812593846850483	0.12051949972257578	0.0966522
ANKRD11_4	GGGGCGGGGTACGGCGCCT	ANKRD11 p.A2017T	0.0770707	0.5283836673029927	0.1202048202267562	0.32509967685992613
APC_63	ATGTAATCAGACGACACAG	APC p.Q1291*	0.1642435240124745	0.3582449536750825	0.1201152879024764	0.5019554006695901
CDKN2A_42	GCCCGTGGACCTGGCTGAG	CDKN2A p.P114L	-0.0396673	0.652497	0.12009040175750456	0.17210931131690457
APC_122	TTTAGTTTTCCTTACAAAC	APC p.S179F	0.0120142	0.9386802248205882	0.1199096369637282	0.4421543449515016
ASXL2_14	AGAATTCATTGTTAAGGGC	ASXL2 p.E330K	0.12605090988081927	0.5171565444708536	0.11977501629009812	0.5383572630663713
FLT4_17	CAAGGCGAGACCTGCATTC	FLT4 p.A1158V	0.0585142	0.4867532861777228	0.11947755324849188	0.15540860341716717
DDR2_24	TCCGCCAAGAGATCCAGCG	DDR2 p.R133Q	0.245975	0.00922638	0.11940574463890052	0.20684938775393769
STAG2_3	TACAGCTTCAGGAAAATCA	STAG2 p.Q275*	0.367322	0.0178086	0.11929522428965011	0.4429504703572802
APC_108	TTGCAGATCTCCACCACTG	APC p.Q879*	0.0994609	0.3746028939597037	0.11920462653238548	0.28726184442184094
RUNX1_11	CTTACTTCGAGGTTCTCGG	RUNX1 p.R204Q	0.0919852	0.4392772444416878	0.11907883127047648	0.31669596696548186
FOXP1_5	ATACTTACGGGCTGAGGGG	FOXP1 p.X382_splice	-0.0868403	0.5359467788494681	0.11865431295377445	0.39686460141197594
EPHA3_24	CGGAATCCCGGCAGCCTGA	EPHA3 p.P885S	0.0684274	0.5533059387106463	0.11828911669525032	0.30538629733085393
FLT3_4	GCAGCTTCGTACACTGTCC	FLT3 p.E77K	-0.0812872	0.47583911711262167	0.1181641652310517	0.29915514444459196
RRAS2_2	CGCCCCCGCCGACCACCAC	RRAS2 p.G23D	0.20985669976257573	0.00795491	0.11810828053742886	0.13561034213211057
IGF1_4	CTCGCTCTGTCCGTGCCCA	IGF1 p.R119C	-0.138949	0.12996252498267788	0.11772893034653126	0.1986516139873696
RB1_25	AGTTACCTGTGATCCAATT	RB1 p.X444_splice	-0.342105	0.1702226851916849	0.1177106122415261	0.6352367414775301
MITF_1	GGGTTCTTGCTTGATGATC	MITF p.E419K	0.0330667	0.8521491238877473	0.11751766069019526	0.5073658781700084
TP53_162	GGGACTGTAGATGGGTGAA	TP53 p.X33_splice	0.5536893904475636	0.00163979	0.1174243208125636	0.506939
HIST1H3B_18	TCCTCAAAGAGCCCTACCA	HIST1H3B p.E106K	0.15558642032902445	0.1959694031251411	0.11738611955180522	0.3295029510556215
IGF1_7	GGGCATGTCGGTGTGGCGC	IGF1 p.D128N	0.0460813	0.6404463249417703	0.11729738295228104	0.2342340401840122
HRAS_1	CGCCGGCGCCCACCACCAC	HRAS p.G12S	-0.038586	0.5575217229837709	0.11728914962079937	0.0742478
NOTCH3_21	GCCCGTTATGCCCGTGCTG	NOTCH3 p.R1848C	-0.0948437	0.46024007464081784	0.11723058812207424	0.36058524081292936
AMER1_1	ACCAAGCGAAGTTCCTGCC	AMER1 p.R358*	5.340293546611802e-5	0.9994737968196286	0.11717684089713584	0.14742818779895178
KIT_5	CTTCCGGATGCTCAGCCCT	KIT p.R888W	-0.0157376	0.8626251882044611	0.11701900101934812	0.19759706296992544
NF1_89	ATCCAGGATATATCCAAAG	NF1 p.Q282*	-0.058263	0.7997860845074524	0.11694426606476964	0.6100636209238378
RNF43_37	GGGCGGCTCTCTAACCCAC	RNF43 p.R609W	0.0998339	0.4016862398400966	0.11692557012287318	0.3260517776248024
TP53_11	TCCTCAGCATCTTATCCGA	TP53 p.Q192*	0.12670481190769298	0.3150926044379525	0.1167791613425798	0.3546700975595771
IKZF1_7	ATTTCGTTCTCCTTCTCGT	IKZF1 p.E304K	0.0431123	0.729857	0.11675067301868344	0.3495503382130423
HIST1H3B_12	AGATCGGTCTTGAAGTCTT	HIST1H3B p.D82N	-0.0940825	0.49088114808537553	0.11674481670937974	0.3914052784011583
SDHD_2	AGTTCGAAGCAACAGAGCT	SDHD p.R22Q	-0.163929	0.4070592281833709	0.11670504048634622	0.554212
PAK5_28	GCCCGTCCAACTTTGAACA	PAK5 p.P14L	0.00507421	0.9604305926893572	0.11628666281008523	0.2550288025486589
NF1_46	TTACCACTAAAATGAAGCT	NF1 p.X2143_splice	-0.210047	0.29765543893905105	0.1161741049846062	0.5630125200398637
FLT3_1	CAGCTTCGTACACTGTCCC	FLT3 p.E77K	0.0956172	0.4714558793829646	0.11616040019383354	0.3816682457612278
RHEB_2	CTACCGGTCTGTGGGTGAG	RHEB p.S16F	0.0208365	0.8578935260145174	0.11607473480958992	0.31828
FAT1_15	GCTGCGGACCGTGGCATGA	FAT1 p.R227C	-0.0161043	0.880691	0.11587935225199864	0.2797149143245683
SMAD3_10	CTCCGTGTCAGCTCCACTG	SMAD3 p.R287Q	0.10520555666655952	0.2614870429471336	0.1158267290334838	0.21642046319465835
TGFBR1_13	TCTTAATCCGCAATGCTGT	TGFBR1 p.R487Q	0.0431514	0.7119461983274014	0.11577947495253343	0.32155413981145875
AR_6	CGGTCCGGCCAGAGCCAGT	AR p.G373R	0.071274	0.5018637262411019	0.11562940809969376	0.2758648070506165
IKZF1_20	CCTGCTCCGGCACATCAAG	IKZF1 p.R162W	-0.00793576	0.9292421324746822	0.11556948895169156	0.19548156927950655
PTPRT_52	TTCCACTTCCTTCAGGATG	PTPRT p.E324K	-0.0386791	0.7669620871659399	0.11541773258712584	0.375938
SMAD4_28	TCTTCAGCACCACCCGCCT	SMAD4 p.Q289*	-0.00543017	0.965449	0.1152482820733569	0.35771262916376945
BRD4_8	GGCGCGGCGGAACTGCTCG	BRD4 p.A1230T	0.0564229	0.5236421770096014	0.11524183688759893	0.19254544817706792
CARD11_20	GGAGCTGCGAGACAAGGTG	CARD11 p.R337*	0.14522571036507498	0.3463582007014957	0.11515085232228736	0.4554588996963248
STK11_37	CCCAGGTCGGAGATTTTGA	STK11 p.D194N	0.2334083481767388	0.0676783	0.11504535467477316	0.3684818370957477
PTPRT_50	ACTTCCTTCAGGATGATGG	PTPRT p.E324K	-0.0496809	0.733509	0.11488796526903454	0.4303818085808055
PTPRT_64	GCATTTCTTCTATATATTG	PTPRT p.R791K	-0.142889	0.3334794840617551	0.1148248211956264	0.4356625955952416
PAK5_53	ACTCTTCTCCCTGTACTTT	PAK5 p.E148K	0.0435694	0.7889090967546362	0.1145999597917988	0.4810678360432744
GLI1_21	ATGTGCATCGCGAGTTGAT	GLI1 p.R113Q	0.4092796237041698	0.0187768	0.11458101774651036	0.5116516498233673
TGFBR1_20	ATCGAGTGCCAAATGAAGA	TGFBR1 p.R157*	0.0301411	0.8646056144083708	0.11430459255959996	0.5176377716972984
FBXW7_27	TATTCGAAACCTAGTCACA	FBXW7 p.R658*	0.3268299939909002	0.0386756	0.1142086265465804	0.4711392246199874
BRIP1_4	GATTGCGTCATAGTACACC	BRIP1 p.A745T	-0.0832838	0.6054409097220393	0.11420209405895695	0.4781028875164647
PTPRS_34	CACGCAGGTGATGTTCACG	PTPRS p.V267M	0.26341686637755163	0.0137627	0.1142012163961786	0.28640928007739624
DNMT1_3	CCAGGGTCACGGCGCTGTG	DNMT1 p.T780M	-0.0347927	0.6653736388703971	0.11417788425599078	0.15530874927125368
SMARCB1_14	TCATCCGCCTGGAAGAGGA	SMARCB1 p.R374Q	0.16538198141255597	0.14155595784261354	0.11392460613976602	0.31156656050949555
B2M_1	ATAGATCGAGACATGTAAG	B2M p.R117*	0.22481332279281843	0.40186666170997704	0.11390123296798768	0.6714847620129054
RNF43_30	GTCGAAGACTCCACCTCAT	RNF43 p.R337*	-0.16835	0.0931781	0.11387314703957688	0.25493717400776494
AKT1_6	TGTACTCCCCTACAGACGT	AKT1 p.E17K	-0.0776885	0.6424294259232785	0.113829	0.49574818895544337
TP53_239	CTCAAAGCTGTTCCGTCCC	TP53 p.E271K	0.012783	0.8845154149787121	0.11373211971510494	0.19586136499817455
MAP2K1_6	TTGATCTCCCCACGGGAGT	MAP2K1 p.E203K	0.1546630921255608	0.2789671285757281	0.11361308144565792	0.4266535453763033
ETV1_2	GTACCAACGCCAGATGTCT	ETV1 p.R213C	0.0552234	0.6493317686679891	0.1132800894406552	0.35075828352315286
PTPRT_58	GTGACACCCCGTGTGCGGC	PTPRT p.R1207C	0.0626449	0.4018564248839121	0.11323048218809974	0.12958917973124445
PAK5_31	ATCTGGCCCGTCCAACTTT	PAK5 p.P14L	0.255412	0.00947012	0.11318538381109355	0.2512391450504385
KMT2D_77	ATCAGCGAGCACCCTATCC	KMT2D p.Q2800*	0.0422719	0.7517339788628999	0.11318511851096882	0.39683720839932857
PAK5_4	TTTCGGTCGTGTAGTCAGC	PAK5 p.E144K	0.12360399048797072	0.3775874010240209	0.1131010516054601	0.4195998440123954
ZFHX3_9	ACCCTTCGTTGGGTGCAGA	ZFHX3 p.E2873K	0.0854762	0.5294329221412438	0.11298677295933068	0.4057978971524258
TP63_26	AATTCGTGGAGCTGCCGGT	TP63 p.E609K	0.12272704908137044	0.1651071644006969	0.11292877405802466	0.20166
RAC1_5	GTGCTCGGCGCTCACACAG	RAC1 p.A178V	0.10953613844678751	0.29159282117918284	0.1127171472185132	0.2778653326299161
ERBB2_15	CTGGCGCCGAATGTATACC	ERBB2 p.A293T	-0.0290919	0.8319935708387027	0.11239599006193264	0.4119161368131053
TP53_118	CCACACCCCCGCCCGGCAC	TP53 p.P151S	-0.127518	0.0992422	0.11223570263001131	0.14611685890095086
PTPRT_70	AATGCCATACCTGATAGAA	PTPRT p.X162_splice	0.18552867183522276	0.3509035766906836	0.11221717403932029	0.5728197313794181
MTOR_11	TGCAGGACGCTCACATTGC	MTOR p.V21I	-0.102241	0.18507779015505887	0.11207418373023618	0.14542536773580553
TP53_227	CACAGCACATGACGGAGGT	TP53 p.Q167*	0.0768502	0.5437669875424127	0.11206679414167932	0.3759039465211545
TP63_41	TTTCGGACAGTACAAAGAA	TP63 p.S365L	-0.152328	0.32612225507152826	0.11204853941901552	0.4691610901493446
DAXX_1	TATGCGTCCTTTGTTTTGC	DAXX p.R526H	0.21465536072465816	0.23263286891493393	0.11203228158649012	0.5336628113706815
GLI1_9	GGGAGCGGAAGGAGTTCGT	GLI1 p.R265W	-0.129956	0.3229389012155094	0.11196072651367592	0.39328881065972626
DICER1_9	AATATCCCCCATGGCCTTT	DICER1 p.G1809R	-0.00218693	0.9860098798845712	0.1119266379279554	0.3690395390805058
MUTYH_10	ATGCGGGGCTTTTTCCGAC	MUTYH p.R509H	-0.0218336	0.8702868694286529	0.11171789292919626	0.403047
KMT2D_69	TAGAATCGAGGCATCTACA	KMT2D p.R5448*	-0.0821752	0.5767140217611116	0.1114042148613869	0.4482379792440572
PTPN11_11	GGACCAACTCAGCCAAAGT	PTPN11 p.E76K	-0.00963151	0.9449557163984774	0.11130215668374262	0.42451521758065786
BRCA2_10	ATTTCGCAATGAAAGAGAG	BRCA2 p.R2842C	0.0643573	0.779276	0.11129187572339416	0.627841
NTRK3_17	TTCCGGGCAGCCAGGGTGG	NTRK3 p.R582Q	0.0972798	0.3994416579187452	0.11126597161031716	0.33518586405859996
KMT2C_41	CAACTTACTTTGCATTTCC	KMT2C p.X433_splice	0.0372966	0.7997931120143178	0.11119646585546968	0.4494054165056542
PIK3C2G_11	CTTGTTTCGTTGTTGCTGT	PIK3C2G p.E1231K	0.22113760194389828	0.10077676351856713	0.11113818524757844	0.41014260172760714
NOTCH3_19	TGGCTGCCCGTTATGCCCG	NOTCH3 p.R1848C	0.0226997	0.8048124568196046	0.11109509349161836	0.22616379247864107
CDH1_2	AGCAGCAGTACATTCTACA	CDH1 p.Q449*	0.2193142316922231	0.15650665369583497	0.11106121482005026	0.4736544591335078
EGFR_71	GGTCTTGACGCAGTGGGGG	EGFR p.V592I	0.19296634766725768	0.19609733328035575	0.11089898285684968	0.4579437442485429
ESR1_10	CTTCGGTCTTTTCGTATCC	ESR1 p.R259Q	0.0811722	0.5015155456929186	0.1108874878302568	0.35851696226226726
NF1_73	GGTTTCTTCATCAATTCCA	NF1 p.E2748K	0.25673199143066666	0.17922233544015187	0.11060341113882476	0.5633041511762952
NOTCH1_37	CACACGGTCATGGCAGGTG	NOTCH1 p.D352N	-0.0359142	0.7834580490991601	0.11052076215661016	0.3972479744100706
ATM_73	AGCTGTCTTCGACACTTCT	ATM p.R1875*	0.18443902314529712	0.0800884	0.11046646368351554	0.2950633703450927
NF2_7	TCAACACACCCGGATTGCA	NF2 p.X225_splice	0.0625949	0.6396018890402285	0.11046	0.40851321534925966
FOXP1_14	ATGACGCACTGCATTCTGC	FOXP1 p.R514H	0.0776811	0.5093737028062085	0.11041639082883764	0.34828095308319673
CDKN2A_50	TTCGGCTGACTGGCTGGCC	CDKN2A p.S12L	-0.0945816	0.3115894625046067	0.11039737093801004	0.2367513422097027
TP53_17	CAAACACGCACCTCAAAGC	TP53 p.R273H	0.23578891813012584	0.0626622	0.11034662153778692	0.3841767591456536
PIK3CA_33	AGGGTTCTCCTCCATGGTA	PIK3CA p.E365K	-0.0384052	0.7950250638041673	0.11024579923516054	0.4550839455641496
MED12_22	GTTGAAGTTCGCTGGTCTT	MED12 p.R438C	0.1379438546895253	0.15616689326678013	0.11016931595856484	0.2576651175166101
WT1_8	CTTACCAGTGTGCTTCCTG	WT1 p.X417_splice	-0.01588	0.9010251386826542	0.11013709839599196	0.38796609565666573
APC_76	GTGAGCAAAGACAATCAAG	APC p.Q1065*	-0.112531	0.478043	0.11007204771653482	0.48673521119979446
DOT1L_5	GCAGAACACGCCCCAGTAC	DOT1L p.T735M	0.00345453	0.9757762884746992	0.1100699158482024	0.3328460182467965
IRS1_1	CAGCCTCGCTGGCCGCGCG	IRS1 p.E37K	0.0689906	0.21280095602395568	0.11001831308945556	0.0469037
PPARG_3	CACGGAACACGTGCAGCTA	PPARG p.T475M	0.24606978293971488	0.0753741	0.10996822191358996	0.42758776751145633
SMARCA4_53	GCTGCCCGATGCGGTGGGC	SMARCA4 p.G1194R	0.063609	0.4667757368491958	0.1099558409309361	0.2082696589649259
NOTCH4_30	GCTCACAACGTGGACCCTC	NOTCH4 p.R230H	0.28147818071644704	0.0342742	0.10988392255735302	0.40950393350059205
RNF43_29	ACTGAGGATCGAGCTGCTG	RNF43 p.R145*	-0.138027	0.1785643411997283	0.10953945517910596	0.2847207334080886
STAT3_3	CCTCGGCCACTTGATCCCA	STAT3 p.E506K	0.0319735	0.7109139458210847	0.10938949209797127	0.2044964913304275
MUTYH_5	CAGCAGACCTGAGAGGGAG	MUTYH p.G382D	-0.0898501	0.4475122302239271	0.10933554571813558	0.35447182217813245
NOTCH4_35	AGGTGCTTCCTGGGTGGCA	NOTCH4 p.G487E	0.0667266	0.5244035883993404	0.10931672174392491	0.2969025959544066
KMT2C_13	CTACCCACGCGAAAGGTAT	KMT2C p.R4549H	0.22440946415882967	0.0313046	0.10901012171746356	0.29635597434932737
ETV1_4	ATGTACCAACGCCAGATGT	ETV1 p.R213C	-0.242073	0.0964276	0.10892366326895908	0.453231
RNF43_36	GGGGCGGCTCTCTAACCCA	RNF43 p.R609W	0.0470496	0.7203774056740531	0.10884244793274624	0.4073824925521636
NTRK1_4	GAGCACGATGTCCCGGCGC	NTRK1 p.V511M	0.0883402	0.25140077558492324	0.10833352677165786	0.15956230769644134
EPHA5_10	TTCGTGGACAGCTTGATTG	EPHA5 p.E665K	-0.0381674	0.7704190320047286	0.10829241090561668	0.4070728680416308
SMAD4_35	TGTCATCGACAGATGCAGC	SMAD4 p.R445*	0.19570571619217617	0.19326516275412756	0.10825342271878272	0.4722059185218956
AXL_6	AACCCACGGAGCTGGAGGT	AXL p.T239M	-0.104738	0.3835283600442058	0.10808775767502436	0.3676002683459981
FOXA1_7	GCAGTCATTGAAGGACAGC	FOXA1 p.D226N	0.00761699	0.943126	0.10807235353534848	0.31100817246001394
TP53_275	TGCCGTCCCAAGCAATGGA	TP53 p.Q38*	0.12808955251444828	0.2019453684257438	0.10790479046109924	0.28265721787650716
MGA_17	GCGGCGGCGTGGTGAAATG	MGA p.R2435W	0.0570686	0.6604505369334934	0.10784448812217436	0.4062322110000923
NOTCH4_13	CTCCGCTTCCTTGCTGCGA	NOTCH4 p.R1410C	-0.0509881	0.6184695012303618	0.10776003047704344	0.29211443262116277
TP63_45	TTCGGACAGTACAAAGAAC	TP63 p.S365L	0.0624494	0.72697	0.10775888090846102	0.5467519360119502
GATA3_21	TTTCGGTTTCTGGTCTGGA	GATA3 p.R366Q	0.0304123	0.7875450564406986	0.10768001078058978	0.33968299663003904
ARID1A_57	TATCAACAGCAACAGCAGG	ARID1A p.Q1363*	0.17395463143733375	0.28212401152008026	0.10763492202128516	0.505996
CREBBP_2	CTCCGCACAGCCGTTTACC	CREBBP p.R1446C	0.1400162262827705	0.1609502621135344	0.10761211379539236	0.2815364077006246
SPEN_10	AATTCGTCCCAAGAAATCA	SPEN p.S2411L	0.11818839554419124	0.4330238738380169	0.10756405191242736	0.4756407056814596
MAP2K4_13	GTCTCTCTCTGTTAAAATA	MAP2K4 p.X73_splice	0.0831676	0.6718778950552975	0.10742696691135224	0.584291
MAX_12	TCACCTTCTCTCCTTGGAG	MAX p.X57_splice	0.1311230855386455	0.2617746874755392	0.10738648219964436	0.35829946707446686
ATM_69	GACTTTGTTCCCTCTGGCT	ATM p.S2489F	0.2815301803896668	0.0295673	0.10725284726797962	0.40793615857474663
DNMT1_6	CACGGCGCTGTGGGAGGAC	DNMT1 p.T780M	0.10690412151801904	0.2533258712302748	0.10715496620865228	0.2523092946134312
SH2B3_1	CTGGCGCTGCGCCGGGCCC	SH2B3 p.A223V	0.10726654250419748	0.16822707820146895	0.1070531908600232	0.16915904963628187
CASP8_11	TTCTGCCTACAGGTGGGTG	CASP8 p.S158F	-0.202432	0.12453223793441684	0.10702512226662582	0.4155846142680433
PIK3CB_10	CTTCGAGTTCATCTAAAAC	PIK3CB p.E470K	-0.141236	0.4699707419913351	0.10699365507711388	0.5835678703021852
TP53_328	GAGATTCTCTTCCTCTGTG	TP53 p.E287K	0.0681855	0.6900205846772829	0.10694846546294716	0.5315492899252487
CDKN2A_24	GACCCGTGCACGACGCTGC	CDKN2A p.H83Y	0.19335281766187157	0.0761501	0.10684586034290217	0.3276875480640156
TP63_16	TCAGTTCAGCCCATTGACT	TP63 p.Q70*	0.15141775359522597	0.276773	0.10683508804341746	0.44306299017710543
GRIN2A_93	ACCGGAACCCCTTGCATAA	GRIN2A p.R1169W	-0.14779	0.2112256560918481	0.10669156313429558	0.3652935638027802
ERBB2_28	GCTTGGATCTGGCGCTTTT	ERBB2 p.S728F	0.14243434442498723	0.10119637180779338	0.10665592073199448	0.21996106260087092
TP63_3	GTTTCGTCAGAACACACAT	TP63 p.R379C	0.0230827	0.8880432567470401	0.10665379724618308	0.5151133373665722
PTEN_27	GGCGCTATGTGTATTATTA	PTEN p.R173C	0.2325541952932373	0.37385299102259234	0.10657667956882438	0.6840246446273868
PTPRD_5	TTCCTATCGTGCCGCACTA	PTPRD p.S1896F	0.11997969789267748	0.20413186210563827	0.10653540539974804	0.2596844604431099
PAK5_56	GTCGGAGGAGGAGCCCCAG	PAK5 p.D421N	0.12442956559685008	0.28766746216810996	0.10645343462113505	0.363157
TP53_163	GGACTGTAGATGGGTGAAA	TP53 p.X33_splice	0.26467698683626406	0.0461087	0.10644678287961674	0.4235656179433298
TSHR_16	TGCGGATTTCTGCATGGGG	TSHR p.A459V	0.15044504663377928	0.27061362848385395	0.10639664297138691	0.4362389311513819
EGFR_8	GGTGCCACCTGCGTGAAGA	EGFR p.A289V	0.0868651	0.44044511859789925	0.10610202111041887	0.3460594950552606
SMAD3_1	AATTCGGAGCGCTTCTGCC	SMAD3 p.R268C	-0.142599	0.12354955374246232	0.10605347121339094	0.25075633686462345
GLI1_22	GACTCTGCCCGGGGTGGGA	GLI1 p.R161W	0.14337659818589815	0.14501737969928624	0.10600359425154286	0.28160520352243623
FBXW7_59	CGAGAACCGCTAACAACTC	FBXW7 p.G477S	-0.0288181	0.7576831719558482	0.1059504571404301	0.25606398963574045
TP53_241	GCTGCACAGGGCAGGTCTT	TP53 p.V143M	0.11522777264222268	0.24432558250484412	0.10594232627931842	0.28461084274779286
SYK_2	CGGACAGGGCGAAGCCACC	SYK p.A52T	0.10339899027175888	0.29674483530282225	0.10576677054908626	0.2859284693257465
TP53_299	GAGCCGCCTGAGGTCTGGT	TP53 p.P223L	0.0601526	0.5043831294233463	0.10560899882523456	0.2410511849897859
SMARCA4_68	GCTGCGGCCCTTCTTGCTC	SMARCA4 p.R973W	0.0380955	0.6625159019436054	0.10556074296103692	0.2263081126021479
JAK1_8	CCAAATCGCACCATCACCG	JAK1 p.R93C	-0.194712	0.0404356	0.10545349700693936	0.26561965577865543
NUP93_16	TGCGGCGGCTGAACTTCGT	NUP93 p.R524W	0.0486935	0.6414491484393876	0.10536170914507702	0.31342961803149805
KMT2B_6	TGGGCTCCCCTTTGTGATC	KMT2B p.P302L	0.19188168071672224	0.1565852090846603	0.10491247127312996	0.43908903568416185
SMAD4_66	GGCCCTCCAGCTCCTAGAC	SMAD4 p.Q534*	0.0102909	0.9229550726826712	0.10489076644242384	0.3239661081871864
PIK3CG_4	ATTCTCCACGGCGCAGGAG	PIK3CG p.R477H	-0.0897398	0.4334575891305251	0.10488571010433896	0.3592088658017629
SOX17_4	ACGTCCCCGCTGGACGGCG	SOX17 p.S225F	0.16517934477027388	0.0200752	0.1047578477154666	0.14073952565895467
TSHR_12	CTTTGCGGATTTCTGCATG	TSHR p.A459V	-0.0634001	0.5432894494919355	0.10473060288205029	0.31452697302546373
TP53_301	CCCTGTGCAGCTGTGGGTT	TP53 p.Q144*	-0.146712	0.1566350200689253	0.10460430081999209	0.3112314100614827
PLCG2_10	ATGGCGAGCACCGAGAACC	PLCG2 p.R1071H	-0.0786014	0.3987775772075019	0.10443178117773366	0.2612
VHL_10	AAAGAGCGATGCCTCCAGG	VHL p.R161*	0.0467571	0.6446880077896767	0.10443099467942311	0.30282635203741376
CDH1_16	GGACCGAGAGGTCAGGGGT	CDH1 p.R335*	0.0692074	0.6139009979956809	0.10425131687647708	0.4472044868395804
AXL_21	GCATCCAGGCGGGAGAACC	AXL p.A273V	0.0925913	0.379728	0.10384374346794197	0.32460280248367274
VHL_1	TCCGGAGCCTAGTCAAGCC	VHL p.R167W	0.0151616	0.8864380164204467	0.10378547869168932	0.3279136605543397
PDGFRB_8	TTACTCGGCATGGAATGGT	PDGFRB p.R150Q	0.0938824	0.6371789863560562	0.10371821085067416	0.6023606654361908
MAP2K4_14	GCGCATCACGACAAGGATA	MAP2K4 p.R281*	-0.0893287	0.5856693471544123	0.1036445314870508	0.5264997458738374
ERBB3_24	GCTTCGGGGGCCTACGGAA	ERBB3 p.R475W	0.0769141	0.5764690269054928	0.10358494668136028	0.45189404712998343
RNF43_38	GGCGGCTCTCTAACCCACA	RNF43 p.R609W	-0.0230626	0.8589810746596642	0.10358135862423988	0.42451189228025177
APC_65	TAAGCAGAGACACAAGCAA	APC p.Q789*	0.0680822	0.693389	0.10354934199516964	0.5486911950951897
KEAP1_26	GCCGCGGAGCGGCCTGGCC	KEAP1 p.P361L	0.0920604	0.3585594527831784	0.1035394444114425	0.30181864303314726
GRIN2A_30	CTTGCGGAAGTTTTCACTG	GRIN2A p.R1159H	0.0637884	0.5264341973279234	0.10345293730260038	0.30415933441779525
NF1_19	GAAGACGACCTTTTGATAA	NF1 p.R1534*	-0.141199	0.4392898556235768	0.10338439838556072	0.5706748955111619
STAG2_7	GCTGGTCCTCAGTGGAAGA	STAG2 p.Q167*	0.1502995347374185	0.2544631665440606	0.10333654149187084	0.4336659116751064
SMAD4_68	ATCAACAGTAACAATAGGG	SMAD4 p.D351N	0.15692131107983184	0.4457156970478024	0.10329404000322684	0.6159537718484652
MAX_14	AAACTCACCTTCTCTCCTT	MAX p.X57_splice	0.0559752	0.5861965500937643	0.1032868367486797	0.31502680094665775
EPHA7_30	GTATGTTCGTATCGGGGTA	EPHA7 p.R69Q	0.00297453	0.9860080825320864	0.10319459374829608	0.5426818211977145
RB1_122	TGGAGTTCGCTTGTATTAC	RB1 p.R451C	0.10175446361623562	0.5024497418257066	0.10302742124612407	0.4972497690488501
PAK5_38	AGTTCGCAGTACATCTCCA	PAK5 p.S392L	0.0709705	0.6047454605495466	0.10292578626039946	0.4528083244875844
SMAD4_37	CAGTGTCATCGACAGATGC	SMAD4 p.R445*	0.12952552854248703	0.28801059070503005	0.10290983845182078	0.3987997492193099
ASXL1_6	CCTCAGAGCTGGGTGTCTC	ASXL1 p.Q1063*	-0.0425463	0.6896272229377831	0.10287689633569534	0.3336842700148936
ERBB4_15	TGTCGCCGCTTCAGTAGAG	ERBB4 p.R524C	0.0288635	0.7946569520276858	0.10275761065170362	0.35388077473834406
PTPRT_6	TGGGTTTCATTCCGGAGCT	PTPRT p.E548K	-0.154049	0.3359043808959429	0.10242927198100556	0.5213702194928149
PIM1_5	GCACTCACCAGCTCTCCCC	PIM1 p.X80_splice	-0.0209575	0.8145922471522867	0.10240468907648465	0.25137716064070836
KMT2D_65	TCCATGCGATTTGCCATGT	KMT2D p.R2830*	0.00993345	0.92241	0.10235975017330703	0.3151551917657272
NOTCH4_25	TCCTTGCTGCGATGGCTGC	NOTCH4 p.A1414V	0.0905413	0.24757921805896008	0.10221995894318164	0.19180904401620089
CIC_25	GAGGCGTCTCCAAATGACA	CIC p.A699V	0.1591515346889176	0.12574711590521087	0.10219312619642625	0.3259298636361928
ARID1A_88	GTGACCGAAAGAACCCGGT	ARID1A p.R2158*	-0.0356425	0.789261	0.10213358806630796	0.4431778939988305
RAD21_2	AGCCGCCTCCAGGAGTCAG	RAD21 p.R450C	-0.0364731	0.7356504240217718	0.10212541543232465	0.34390898511996515
ATM_42	AACTTTCGAATTCGAGTGT	ATM p.R248*	-0.0925441	0.594379	0.1019689378677101	0.5567860686304278
PTEN_34	AGATCCTCAGTTTGTGGTC	PTEN p.Q214*	0.13750874634696642	0.28358082837317194	0.10179379489769748	0.427617
KMT2D_28	TGGATGTGCGACAGCTCTC	KMT2D p.R4904*	0.0697528	0.5733111502561988	0.10172831168604744	0.41142847069697114
NFE2L2_6	CTCTTCATCTAGTTGTAAC	NFE2L2 p.E79K	-0.136674	0.5240416049293934	0.10167936091426603	0.6348439422824588
KIT_3	GCCTAATCTCGTCGCCCAC	KIT p.E53K	0.0525419	0.6170754336253437	0.1014356847429661	0.3342552671360723
PIK3CA_43	AGTGTTCCTTAAAAAACAA	PIK3CA p.E418K	-0.0719194	0.7410546608537676	0.10132131888142196	0.6412027385767272
RAC1_2	TTGACGAAGCGATCCGAGC	RAC1 p.A191V	0.0407243	0.6815135088353368	0.10129268496790816	0.30715478116882355
RB1_84	ATTCCTCGAAGCCCTTACA	RB1 p.R787*	0.2353789584402219	0.0898905	0.10120709664411193	0.46657276685576754
TSHR_14	GCCTTTGCGGATTTCTGCA	TSHR p.A459V	-0.0285397	0.7973504103059399	0.1011797739512742	0.3621288394552092
EGFR_13	CTCGTGCGTCCGAGCCTGT	EGFR p.S306L	0.0767439	0.43705064743696626	0.10106534273945832	0.30605957539209794
CDKN2A_73	GAGGGCTTCCTGGACACGC	CDKN2A p.P146S	-0.0472226	0.6371017604405907	0.10106474752761432	0.3120565885657207
TP53_139	TGGCCATGGCGCGGACGCG	TP53 p.A161T	-0.0299975	0.7316160427515506	0.1010616037241783	0.24748079279264876
PIK3CA_2	CTGCTCAGTGATTTCAGAG	PIK3CA p.E545K	0.0836111	0.581717	0.10102268297861804	0.5056869098751614
HIST1H2BD_6	GGGAAGCCTCGCCTGCGAT	HIST1H2BD p.E77K	0.0615056	0.4569438987848358	0.10097720672328978	0.22190338003894763
NF1_77	ATGCGACTAAAGACTGCAT	NF1 p.R156H	-0.021338	0.8884863702898868	0.10096043926089548	0.5066453031165259
AMER1_2	AAGCGAAGTTCCTGCCTGG	AMER1 p.R358*	0.10098945532153318	0.3357111776164932	0.1009527433225893	0.33598234539229754
ERBB4_42	TCAGTTTCGTTACCTGCCT	ERBB4 p.R95C	-0.127456	0.2876280687533598	0.10094789568183556	0.3987883472755777
ARID2_12	ATGCTCACGGAAATGGGAG	ARID2 p.T426M	0.12185244023863524	0.40460152160497026	0.10088922559053635	0.49039192165466255
NF1_75	TGATCAACGAATTCTTTAT	NF1 p.R2637*	0.21445707850112583	0.266692	0.10077541258821245	0.6022832184638087
SMAD2_13	GTGGCATTTCGGTTAACAT	SMAD2 p.R321Q	0.1813825098598656	0.330144	0.10076597831885813	0.5889249011033358
MTOR_9	CATGCGCTGCCTCGAGGCC	MTOR p.R1482C	-0.107211	0.16447692102394434	0.10060662668479509	0.19121084621624737
TERT_5	CTTCTTCGGCGGGTCTGGC	TERT p.E280K	-0.0268518	0.7254403530087896	0.10050596763752986	0.1882186123127501
KMT2D_78	TATCAGCGAGCACCCTATC	KMT2D p.Q2800*	-0.188217	0.10992481752757031	0.10039658911637808	0.392039
CHEK2_8	AACACTTTCGGATTTTCAG	CHEK2 p.R145W	0.4079480009764239	0.0172116	0.10030149684227364	0.5594022197737256
CREBBP_6	TCCACGCTCTGCATGCTGG	CREBBP p.T1688M	-0.463567	4.8484308305659136e-8	0.10019956421459927	0.2348764376286595
PTPRD_31	CTGACAAATCGTGGAAACA	PTPRD p.R1088C	0.0847373	0.5572734413640699	0.1000688201378212	0.4882904182915319
KMT2C_2	ATGAAAAGGCAGCAACAGC	KMT2C p.Q1719*	0.2743295905198222	0.0660929	0.0999819	0.503745
SMARCA4_78	CGCGCCTCATGGAGGAGGA	SMARCA4 p.R1336C	0.0130891	0.9250370002177232	0.0999652	0.47219344275498265
TP53_311	GCTGCCCTGGTAGGTTTTC	TP53 p.G105D	0.15566504426303726	0.20851689302782211	0.0998333	0.4201610781908875
RPTOR_3	ATGACGGGCTGGGCAAAAT	RPTOR p.V971I	0.0749363	0.5273764232856621	0.0995423	0.40115076128555704
TSC2_9	GGCGGAGATCCTGGTCCGG	TSC2 p.A1195V	0.088863	0.44848998928970457	0.0994495	0.39634978174294566
CDKN2A_107	GGCCCGGTGCAGCACCACC	CDKN2A p.R99Q	0.0219106	0.8356835544778335	0.0994485	0.3462541219618883
SMAD4_10	AGGAGATCGCTTTTGTTTG	SMAD4 p.R361C	0.21834063249065927	0.11475634864435336	0.0991176	0.4747705743901977
GRIN2A_13	TCAATCTGACGGGATCCCA	GRIN2A p.T888M	0.2175549107519685	0.0216665	0.0989333	0.29719546417434883
MED12_2	TTTGCTGTTCTCAAGGCTG	MED12 p.L1224F	0.268303	0.0948464	0.0988171	0.5391623899583595
INPP4A_2	GAGGCGCTGGAAGTGGCCT	INPP4A p.A753T	0.049568	0.5664453181765063	0.0985692	0.2540175591869083
TP53_188	GCAGCGCTCATGGTGGGGG	TP53 p.E180K	0.1045964410754313	0.32286079986079913	0.0985484	0.3517425704260064
CDK8_2	TCTCTATGTCGGCATGTAG	CDK8 p.S62L	0.3693177288505069	0.0150804	0.0984965	0.5178547307091186
ALK_26	GGCGACATGCCAGACCATC	ALK p.A585T	-0.0162979	0.8677678786781726	0.0983386	0.3145167525284421
NOTCH1_6	CCCCATGGCCGCACAGGTG	NOTCH1 p.R365C	0.0396475	0.7193626525274632	0.0983005	0.3728672236207365
PPP6C_7	GAAATCATGAGAGTAGACA	PPP6C p.H114Y	0.0447439	0.8612122747273462	0.0982324	0.7010232777289447
CSF1R_2	GACGCCTGCTTCCAGCACC	CSF1R p.V138I	-0.0738082	0.4557568568887762	0.0981594	0.32075376208289974
GATA1_10	TGGCGGAGAAATGCCAGTG	GATA1 p.R270W	0.15372338068488237	0.34749104166617806	0.0981162	0.5490127911411116
PTPRT_82	GATAACCATCCTGTGGCTG	PTPRT p.D1346N	0.0117161	0.92185	0.0980345	0.4113723702183461
KEAP1_17	CAATCGTCTCCTTTATGCC	KEAP1 p.R470C	-0.0951536	0.4574	0.097943	0.443477
ERBB4_12	GTCGCCGCTTCAGTAGAGG	ERBB4 p.R524C	0.15318006432714998	0.1616100486604052	0.0978833	0.37145905242858185
CDKN2B_2	ACGGCGCGGAGCCCAACTG	CDKN2B p.A70V	9.706337513059204e-4	0.9912747111513897	0.0977063	0.2706512944116812
SMARCA4_62	GCTCGGTCCTGCGCTTGCA	SMARCA4 p.R1189Q	0.10641338623404072	0.2584467640406652	0.097647	0.29985270785240997
TSC2_12	GTGGCGCTTCTTGTCGCAG	TSC2 p.R1639H	-0.14039	0.25768577476975135	0.0975158	0.4308407541495983
HIST1H2BD_1	GCCTCGCCTGCGATGCGCT	HIST1H2BD p.E77K	-0.10176	0.268764	0.0974521	0.288974
EGFR_25	GGTGGCACCAAAGCTGTAT	EGFR p.A289T	0.0402385	0.7540675564831062	0.0974251	0.4479632367280341
KMT2D_21	GCTTCGAGCACAGCTCCAA	KMT2D p.R4198*	0.00153425	0.9888308772171132	0.0974002	0.37376065435764366
PTPRD_48	TTCGTTGCTGGAAGCAATA	PTPRD p.R561Q	0.0281324	0.8897116749741507	0.0973981	0.6309875247880955
FLT1_11	AGCTACGGTTTCAAGCACC	FLT1 p.V347I	-0.199074	0.076178	0.0968326	0.38673296724197376
ESR1_13	GGCTACATCATCTCGGTTC	ESR1 p.S432L	-0.130447	0.2786476106218067	0.0968181	0.42034022825784906
SMARCA4_69	AAAGTGCTGCGGCCCTTCT	SMARCA4 p.R973W	-0.0557125	0.5343879562488509	0.0966386	0.2804796995438397
CASP8_7	TTTCTGCCTACAGGTGGGT	CASP8 p.S158F	0.17307645212463146	0.21596088071947844	0.0966315	0.4901657437135343
PTPRT_36	GGTCGTGTGAGGAGCACTC	PTPRT p.R364Q	0.00322343	0.9792716071582104	0.0965874	0.43589873464853546
TP53_269	CTACTGGGACGGAACAGCT	TP53 p.R267W	0.094650410476412275	0.4065298453901626	0.0961722	0.39915327280677687
ALK_16	GTGAATTTTCCCCGGGTTT	ALK p.E668K	-0.0498495	0.686433	0.0961166	0.43561485367213143
GRIN2A_36	AGTTCGCGCTCTGTCACGT	GRIN2A p.E50K	0.0789812	0.40215263358916414	0.0957556	0.3098129943783391
SMAD4_52	CCATTTCAAAGTAAGCAAT	SMAD4 p.E330K	0.10941878878171032	0.46260181156038976	0.0956999	0.5207466781061756
PIK3CA_49	AAAGCCGAAGGTCACAAAG	PIK3CA p.R93Q	0.31311284026259484	0.00824235	0.0956291	0.4207205434879407
FGF3_2	GCACGCGGGGCAGGAACAG	FGF3 p.R181H	0.0786226	0.4141820473227985	0.0956238	0.3206804741220952
PTPRS_21	ATAACCGGGGCCTGGAGCC	PTPRS p.R1234W	0.15345855839380657	0.0764601	0.0955893	0.2702368065850736
NOTCH2_2	TACCAGGGTGCCAGCCTCC	NOTCH2 p.Q1865*	0.0521239	0.54196	0.095351	0.26446127869976405
PGR_13	ACTTCGTAGCCCTTCCAAA	PGR p.R836Q	0.28116098794049993	0.00899382	0.0952764	0.37723073828117576
GNAS_8	CGCTGCCGTGTCCTGACTT	GNAS p.R201C	-0.0270779	0.7668885203904237	0.0951772	0.2969930784655893
CREBBP_9	TGGTCCACGCTCTGCATGC	CREBBP p.T1688M	-0.272601	0.00896033	0.0951399	0.3596380887329463
FAT1_34	GTGACGGTAACATCCACAA	FAT1 p.V2908I	-0.00558342	0.9581119844357312	0.0950907	0.3706398747767258
ARID1A_20	TCTCAGCCTCCATACTCCC	ARID1A p.Q515*	-0.000171446	0.9988844445068824	0.0950575	0.4379368658853135
INPP4B_6	ATGCGAATTCGAGAGCAGA	INPP4B p.R252*	0.2965759604521962	0.0691709	0.0948736	0.5620321659636465
ARID2_11	CTCACGGAAATGGGAGATG	ARID2 p.T426M	-0.175394	0.3203218110510275	0.0944618	0.5919632680619978
HIST1H3B_6	GGGCGATTTCTCGCACCAG	HIST1H3B p.E74K	-0.0664643	0.5757737018304541	0.0942995	0.42667067703149314
CDKN2A_95	CCGGGGCGCGGCTGGACGT	CDKN2A p.A102V	0.090341	0.2276189005622189	0.0942857	0.20803051224774424
PDGFRA_9	ACCGAGAGCTGAAGCTGGT	PDGFRA p.R512*	-0.124858	0.2872535358551451	0.0940986	0.42135
FAT1_1	TTAGATCGAAGTAACCAAG	FAT1 p.R1627*	-0.22286	0.27161215730053695	0.0940854	0.641773
KDM6A_24	AAGAATCTCAGAGCCCCAT	KDM6A p.Q863*	0.13592906278554354	0.471382	0.0938264	0.619304
KDM5C_8	CAGCTGCGTCGCACCAATT	KDM5C p.R1165C	0.0893695	0.2876012037349947	0.0938076	0.26442541696148647
TCF7L2_11	ACTTACGAACTATGGAGTG	TCF7L2 p.X334_splice	0.2531446251712474	0.24985526066521307	0.0934101	0.6715141318901319
EPHA3_15	GCTGTTCGGGCTCGGATTT	EPHA3 p.R512Q	-0.0630823	0.5651458040674225	0.0933301	0.39408208363582786
RASA1_4	TTCGGTCTTGTCCACATAC	RASA1 p.R749Q	0.15004730662427845	0.23698159375005015	0.0931955	0.46302682206906853
RET_1	AGCTGGCGGTGCTGGTCAA	RET p.A373V	-0.0256315	0.7496208781748366	0.0931676	0.24547601132476204
EGFR_5	CTTTGGTGCCACCTGCGTG	EGFR p.A289V	-0.0269389	0.774636	0.0931546	0.32175117127154185
DIS3_4	CATAGATCGTCTTGCTTGT	DIS3 p.R210C	-0.201474	0.15233960551620376	0.0929814	0.507489
ASXL2_6	GAGAATTCGACAAGAGATT	ASXL2 p.R357*	-0.0273512	0.880119	0.0929377	0.6080434176476932
JAK1_4	CAAATCGCACCATCACCGT	JAK1 p.R93C	0.11570557316463367	0.17376970730804225	0.0927136	0.27603792263289106
NF2_21	TCGCTCGAGAGAAGCAGAT	NF2 p.R341*	0.0451332	0.7985779969965949	0.0924975	0.6008853112217225
ROS1_18	CTTGGTCATCAGCCTTATC	ROS1 p.Q2160*	-0.058731	0.6107449530514893	0.0924917	0.42225534480097393
TP53_330	AGGTGGCTGTAGGAGACAG	TP53 p.X367_splice	0.14116353835163664	0.21826606037139673	0.0923714	0.420958
EGFR_27	ATTTCCTCTGATGATCTGC	EGFR p.R108K	0.0652454	0.5833492877712232	0.0921695	0.4384122234254972
GNAQ_6	TTCGAGAAGTTGATGTGGA	GNAQ p.R114*	0.29165871090329937	0.10608762801012142	0.0921306	0.6105723259233283
MLH1_3	TGGCTTTCGAGGTGAGGTA	MLH1 p.R100*	0.0665868	0.6844581768337279	0.0921069	0.5740170007315761
LATS2_1	GCGCGCGCGGCGGCGCCTC	LATS2 p.R391H	-0.019111	0.7475607926904021	0.0919113	0.12129128102757102
CIC_11	AGGGCCCGGTGCCGCTTGC	CIC p.R215Q	-0.000563227	0.9948748147958052	0.0918696	0.2944903444309352
TP53_209	TCTTCCAGTGTGATGATGG	TP53 p.E258K	0.0922145	0.5652231549609579	0.0918586	0.5668293133178774
BLM_10	CAGAAGTTTCCTTCTGTTC	BLM p.P822S	0.11748243332955884	0.28909279506033225	0.0917409	0.4080158311714285
ARID1A_68	TTGCTCAGCAAGGCACCAT	ARID1A p.Q1493*	0.14408292827787417	0.24384422409677492	0.0917258	0.4583910065678504
APC_105	CTGCAGTTCAGAGGGTCCA	APC p.Q1477*	0.2969565077626967	0.0209105	0.0916823	0.477001
TP53_36	ATCCGAGTGGAAGGAAATT	TP53 p.R196*	0.0622284	0.7663953416243308	0.0914345	0.6624362051450443
STK11_8	CTGTCAGCTGATTGACGGC	STK11 p.Q159*	-0.25703	0.0169524	0.0913746	0.394234
SMARCA4_6	CTGACGGGCACACCGCTGC	SMARCA4 p.T910M	0.0552463	0.4930593535342287	0.0913017	0.257241
MET_5	CCCAGATCTTAAAACAGAG	MET p.X963_splice	0.27467355874771165	0.0912078	0.09083	0.5774242879700784
SMARCA4_63	GTGGGCTCGGTCCTGCGCT	SMARCA4 p.R1189Q	-0.0269739	0.7516621856775454	0.090677	0.28693762859015315
PBRM1_8	TCTCACCGGTAATACTTGC	PBRM1 p.X332_splice	0.0789551	0.5762900274020255	0.0906433	0.521223
AKT3_4	TATTCTCCTACATGAGGAA	AKT3 p.E17K	-0.286885	0.0800683	0.0905563	0.5791715563963631
IKZF1_52	GCACGCGCGCAACGGGCTG	IKZF1 p.R423C	-0.00881772	0.9255958745360084	0.0902831	0.33865695127330225
KMT2A_9	TTGTTTTCGCCACTCCATT	KMT2A p.S680L	0.0237167	0.8419916009457187	0.0901235	0.44848906557690377
PTPRS_3	CCCACGGTGGTCAGCAGGC	PTPRS p.V488M	0.0923994	0.3390504377113659	0.0900259	0.3517389939241974
HIST1H3E_6	ATGGCGCTGCAGGAGGCCT	HIST1H3E p.A92V	0.1486255147789964	0.22608829109166623	0.0899395	0.4641082702053761
PIK3C2G_14	AATCTTCGTCCACAAGACA	PIK3C2G p.R1142C	0.0240227	0.8856599163534125	0.0897354	0.5910095445885883
EPHA5_14	TAGCAAATTCGTGGACAGC	EPHA5 p.E665K	0.3364598067143991	0.0259073	0.0897052	0.5534586106232985
FBXW7_23	CACCAGTCGTTAACAAGTG	FBXW7 p.S582L	-0.0334575	0.8409232924416182	0.0895554	0.5907705026100258
EGFR_28	TTTCCTCTGATGATCTGCA	EGFR p.R108K	0.1329733732113745	0.2791357359868984	0.0894324	0.4669320750395807
APC_70	ATACTTGGATTTTTGTCCT	APC p.X438_splice	0.0941118	0.5576499116682221	0.0894268	0.5775270996837468
MYCN_2	ACTCGACCCCCCCGGGGGA	MYCN p.P44L	-0.109941	0.24350186689340292	0.0893624	0.34223703142815515
KMT2C_10	TTCTCAGTGGCACCACAAT	KMT2C p.Q448*	0.0975965	0.49181799733257137	0.0893587	0.5291745097961283
AKT3_3	TATATATTCTCCTACATGA	AKT3 p.E17K	0.15534899865470983	0.5036539870448322	0.089194	0.7012221008462305
GRIN2A_5	TAAATTCCTGCAGCAATAG	GRIN2A p.S1447F	0.0651105	0.6872150528796631	0.0891713	0.5813230042630047
AXL_20	CATCGTTTGACAGCACAGC	AXL p.D267N	-0.194786	0.11025970473647388	0.0891443	0.4635580698908813
RNF43_9	GGGCATGGCCGGGATGCTG	RNF43 p.G347D	-0.015322	0.8858637183778904	0.088976	0.4041013853719906
PLCG2_7	GAGACGCACCTGCGCTGCG	PLCG2 p.T620M	0.0770481	0.2675610958980785	0.0889402	0.2006414254321295
IRS1_3	CCCAGCCTCGCTGGCCGCG	IRS1 p.E37K	-0.0208119	0.7308416557788247	0.0889287	0.14127039491510587
FBXW7_61	TTCTTGTCTCTGGGAATGC	FBXW7 p.S596F	0.18898198287207912	0.0778855	0.0886966	0.4087301797265948
SPOP_13	TTCCTCCCGGCAAAAGCTA	SPOP p.E47K	0.0060417	0.952075	0.0886753	0.3773826920656981
SMAD4_9	GAGGAGATCGCTTTTGTTT	SMAD4 p.R361C	0.00621182	0.967698	0.0886674	0.5628960155779061
PTPN11_13	TCCAGCACTGCGGGCAGAA	PTPN11 p.A461T	0.00407045	0.9689001089016392	0.0886583	0.39548226853441976
STK11_32	CGGCAGATCCGGCAGCACA	STK11 p.R304W	0.0591872	0.5323224379634197	0.0886308	0.3497187642685926
TGFBR2_28	CCCGGGCGAGGGAGCTGCC	TGFBR2 p.A380T	-0.109301	0.15342770818539528	0.0886247	0.24617843446444357
ESR1_11	ACATCATCTCGGTTCCGCA	ESR1 p.S432L	0.14257078140117346	0.2040454707520865	0.0885807	0.4303622704973467
PPP2R1A_21	TCATGCGGTGCAGGTAGTT	PPP2R1A p.R498H	0.0173279	0.9008495493377252	0.0885634	0.5241179945638932
PIK3C2G_13	TATCGCTTCTACTGCAATA	PIK3C2G p.R681C	-0.124376	0.39219168358760087	0.0884959	0.5419362304655346
RB1_78	GGTCAGAACAGGAGTGCAC	RB1 p.Q257*	-0.0731747	0.6175414565253955	0.0884056	0.5457993092479929
CDKN2A_103	AGCCCTCCCGGGCAGCGTC	CDKN2A p.E88K	0.0875223	0.26381327145236494	0.0884042	0.25913523209850226
CTNNB1_29	ACATTCGGAACAAAACAGC	CTNNB1 p.R661Q	-0.134	0.3878001167033737	0.088284	0.5687707004318583
HIST1H3B_9	ATCTCGCGCAGAGCCACAG	HIST1H3B p.E51K	0.0444344	0.7460702614429053	0.0880962	0.520764
NF1_76	TTTGATCAACGAATTCTTT	NF1 p.R2637*	-0.150623	0.46574798533437206	0.0878542	0.6697152365810912
KMT2D_98	ACCAATGGTGAGCCCAGCA	KMT2D p.W141*	0.0493506	0.6518407539667028	0.0876485	0.4228499617833965
GPS2_3	AGTCCTAGTCAGCAGCTCA	GPS2 p.Q208*	-0.21757	0.0981629	0.0875712	0.5042442567414747
TP53_245	CTGGCCAAGACCTGCCCTG	TP53 p.A138V	-0.0642901	0.4569030596637527	0.0873281	0.3116584316875468
PTPRT_24	GACGAACACAGTTGATTTT	PTPRT p.R721H	-0.0160805	0.932526	0.0873255	0.6454138465986335
NF1_90	GTCTACGAAAAGCTCTTGC	NF1 p.R304*	0.0770927	0.5413079784191248	0.0871381	0.4899730546493938
ALK_12	CTGGACGCCCGATTCTTCC	ALK p.R395H	-0.0159796	0.8652091187020283	0.0871167	0.3543842519184234
RB1_93	GGTTCACCTCGAACACCCA	RB1 p.R251*	-0.127201	0.3406258099103943	0.0869866	0.513702
TGFBR2_18	GGCAGAACGCTTCAGTGAG	TGFBR2 p.R562C	-0.00191881	0.9890880377582189	0.0869162	0.535335
EPHA7_21	TTTCCTCTTTAGTCGAGGT	EPHA7 p.S225F	0.0334209	0.8412029586219277	0.0867571	0.6029104094074855
PTPRT_116	TCTGTGTCGTACTCAGGCA	PTPRT p.D595N	0.1512123696815077	0.3548113626321919	0.0865731	0.5966313277793578
EPHA3_35	CTTTCGCGTGTCCTGGAGG	EPHA3 p.S768L	-0.143137	0.144619	0.086559	0.3765234426041873
TP53_73	CTGTCCTGGGAGAGACCGG	TP53 p.P278L	0.0613989	0.5595008952489725	0.0859492	0.4139591201811264
GRIN2A_60	CCCATCCGCAGGCAGGCAT	GRIN2A p.R1241Q	0.0737712	0.45883865728695666	0.0859259	0.38830352735121026
CREBBP_17	TTTCCCCACAGACTTTGTG	CREBBP p.S1207F	0.0426768	0.8101090518210796	0.0856709	0.629511
H3F3C_8	GGCGCTTCGAGAGATTCGT	H3F3C p.A47V	-0.0169928	0.908334	0.0856318	0.5614567282087921
EGFR_3	ATCACGCAGCTCATGCCCT	EGFR p.T790M	0.17051605157205174	0.0424017	0.0855886	0.3089605437227909
DAXX_14	TTGGCTTCCTTGGCCCCAG	DAXX p.S675F	-0.0690194	0.4717601699321321	0.0855	0.3718502470148702
SMAD4_13	ATGCGTTTGACTTAAAATG	SMAD4 p.A118V	0.3839738928450516	0.0710075	0.0854447	0.6884955913804642
TP53_232	AATTTCCTTCCACTCGGAT	TP53 p.G199E	0.0971197	0.48984851510236765	0.0854048	0.5438019935562586
PDGFRA_27	GTTTCCCCTGACTTATACA	PDGFRA p.E229K	0.0290682	0.85974819399021285	0.0853586	0.6037498620356929
ESR1_6	GGCGAAGAGGGTGCCAGGT	ESR1 p.A361V	-0.00844939	0.9359962244279724	0.0852142	0.4176152849218679
ERBB4_14	GTCGTGTCGCCGCTTCAGT	ERBB4 p.R524C	0.12369052825944724	0.1782983880539525	0.0851987	0.35413915733161866
TP53_133	CTGACCTGGAGTCTTCCAG	TP53 p.X261_splice	-0.0121254	0.9086762434836544	0.0850826	0.4205355154022992
INSR_4	CAACACTTCCTCGACCAGC	INSR p.S784F	0.0711306	0.4755845763972164	0.0850717	0.39355035878464256
TP53_280	TGCCCTCAACAAGATGTTT	TP53 p.L130F	0.0177956	0.9109343274013486	0.0849957	0.5930247415654311
CDKN2A_57	ACCTGGTCTTCTAGGAAGC	CDKN2A p.G106S	0.0831147	0.6164256740425588	0.0849876	0.6085610763069786
NF2_9	CAACACACCCGGATTGCAA	NF2 p.X225_splice	0.0143248	0.9001440607602942	0.0848372	0.4572059594143409
PDGFRA_35	TAAATAATCCGTCATTCCT	PDGFRA p.D135N	-0.0785973	0.6629109248876479	0.0848289	0.6373735817662105
PDGFRB_6	GTTACTCGGCATGGAATGG	PDGFRB p.R150Q	-0.0274229	0.8323005726100958	0.084753	0.5124227154502383
KMT2C_4	AAGGCAGCAACAGCAAGAT	KMT2C p.Q1719*	0.0371911	0.8148084552871302	0.0844987	0.5945519000150428
NF2_8	CACACCCGGATTGCAAAGT	NF2 p.X225_splice	0.13366902232611785	0.2787075912625834	0.0844535	0.49393462097242896
MAP2K2_3	GTGGGCACGCGCTCCTACA	MAP2K2 p.R231C	-0.0810183	0.3485896355336095	0.0844358	0.3278034169436961
CDKN2A_74	GCTTCCTGGACACGCTGGT	CDKN2A p.P146S	0.0645305	0.4101301375601122	0.0844116	0.2812947077622738
NOTCH3_3	CGCGTGGCAGGCACCTGAG	NOTCH3 p.A1216T	0.00102182	0.9908682665823666	0.0840218	0.3463713745457536
ATR_3	ATTTCGCCTGACTCATAAT	ATR p.R2514C	-0.18235	0.23257275960063475	0.0840188	0.5813323871036524
GNAQ_1	CTCGAACTCTAAGCACATC	GNAQ p.R183Q	-0.093664	0.5327585784757471	0.083922	0.5756293833094274
PTPRD_26	ATCGTGGAAACAGTGCTGG	PTPRD p.R1088C	0.0536973	0.6821319226731086	0.0837983	0.5226965036166817
PIK3CB_1	GAGATCGCTCTGGCCTCAT	PIK3CB p.R847C	0.0334572	0.7777458292023035	0.0837838	0.4795951478208281
FLT4_10	ATCGCTGGATGCCGTTGTT	FLT4 p.R318Q	0.0983079	0.40377992331015133	0.0837291	0.4772397297231464
PTPRT_16	GGAGGTTTCCACTGGATGT	PTPRT p.W506*	0.3181962948931905	0.00692162	0.0836464	0.4788574636470302
GATA3_15	CTTGTCGGGGGGCCACGCC	GATA3 p.S142L	0.0149805	0.8624747561405912	0.0834426	0.3343806162352816
RFWD2_1	CAAGACGAAAACGACTTAC	RFWD2 p.R357*	0.1155293455637158	0.3623333108973844	0.0833636	0.5112270515974512
POLE_7	CCCCCTCGGCCTCCTGGGA	POLE p.E2038K	0.19842642133630517	0.0459512	0.0831632	0.4034136070872774
ASXL2_10	CTGCGAGCACTGATCAACA	ASXL2 p.R284*	0.0782719	0.5090113675946669	0.083126	0.48319422585780386
PIM1_3	GGCACTCACCAGCTCTCCC	PIM1 p.X80_splice	0.0718252	0.438254	0.0830288	0.3702747077282331
TCF7L2_22	CGCGGGATAACTATGTAGG	TCF7L2 p.R420W	-0.102899	0.5537950158460028	0.0828705	0.6328982421543303
PTPRT_47	CCACTTCCTTCAGGATGAT	PTPRT p.E324K	0.1191967938110321	0.3996921009885622	0.0828622	0.5584258617411975
EPHA5_18	TCTTCGACTGAAGACACCA	EPHA5 p.R553Q	-0.0843543	0.5428787668176003	0.0828354	0.5495352790177112
KMT2C_24	TTGGCATAGCGAGTGCTCC	KMT2C p.R4590H	0.1197909578214856	0.33157730198860313	0.0827211	0.5027552607638003
CARD11_21	AGCTGCGAGACAAGGTGGG	CARD11 p.R337*	0.0607941	0.6088532041090118	0.0825123	0.487362
E2F3_7	TGAGCTCGGTCACTTCTTT	E2F3 p.E265K	-0.0693685	0.5646596078189635	0.0824563	0.493081
INHBA_1	CAAGCTGGCGCCACTCTCC	INHBA p.A252T	0.0785574	0.422869	0.0824017	0.4005692491383009
PRKN_5	AGCAGGCTCGTTGGGAAGC	PRKN p.R402C	0.00521657	0.951139	0.0823601	0.3330287900229388
PTPRS_15	CTTGCGTTTACTTTAGGAG	PTPRS p.R1314H	0.011305	0.9376383413526974	0.0821539	0.569463
TP63_19	GGGGATCTTCGTTTCTTGA	TP63 p.R393Q	-0.118887	0.4475477188592031	0.0821474	0.5988242028339144
PLCG2_18	GGTGGAGCGGATCCGGCAG	PLCG2 p.R589H	-0.0663186	0.4585090093054835	0.0821288	0.357966
POLE_12	CCCCTCGGCCTCCTGGGAG	POLE p.E2038K	0.11270464855552297	0.18740943277467853	0.0819065	0.3383011687133713
GATA1_9	GTGGCGGAGAAATGCCAGT	GATA1 p.R270W	0.2336720767541095	0.0559676	0.0817837	0.5045376324144825
ATM_72	TTCGACACTTCTCGCAAAC	ATM p.R1875*	0.0131002	0.8964641594179039	0.0817452	0.416577
PTPRS_72	AGGCGGTAGCCCAGCACCT	PTPRS p.R867H	-0.00553063	0.9524387256012152	0.0811498	0.3811740707859439
RB1_46	GCTTACATATCTGCTGCAG	RB1 p.X605_splice	0.14109398871487525	0.27563548855898756	0.0811361	0.531083
MAX_8	GTGCTCACCTTGCTGCTCC	MAX p.X99_splice	-0.0558365	0.5581599313294032	0.0811319	0.3942500223991709
APC_91	TATTTACCTGACCATTACC	APC p.X278_splice	-0.0191544	0.922378	0.0811188	0.6796584743028864
PTPRT_91	TATCGCACCACCACAGGCA	PTPRT p.R328C	0.14288388308218522	0.12009689552612927	0.0809569	0.37891669823925506
TP53_304	CCGGTTCATGCCGCCCATG	TP53 p.M246I	-0.0522296	0.5737072180487268	0.0809173	0.38297554542523055
TGFBR1_7	AACGTTCGTGGTTCCGTGA	TGFBR1 p.S241L	-0.25926	0.10261214718290015	0.0804727	0.6114208526787126
STK11_42	CTTTCCAGCCGCCCGAGAT	STK11 p.Q220*	-0.105885	0.22789675069029125	0.0803919	0.35920025618500956
RASA1_7	AAGCTTCACCTGACGAAGG	RASA1 p.X592_splice	-0.0369542	0.7721644182365224	0.0802541	0.5290114928371242
ERBB4_16	TCCATTTAATTGGCATCTA	ERBB4 p.W886*	0.1352283439571001	0.4277961432797075	0.0801322	0.6387614586558708
NF2_18	ATCTGCAATAACAAACCAA	NF2 p.X38_splice	0.2660621037420378	0.13475023546901146	0.0800421	0.6528052755661823
PDGFRA_2	AAGGTATCGAAGCAAATTA	PDGFRA p.R376*	0.3839543418152356	0.0911095	0.0799466	0.7257261627067857
FBXW7_12	GGGAGTCGGAATGGGACTG	FBXW7 p.R689W	0.10487419112969118	0.4284216113445649	0.0799403	0.546356
PIM1_7	CCTTTCCGTGATGAAGTCG	PIM1 p.E135K	-0.0842701	0.4671067452293334	0.0799369	0.4897679044253137
KMT2D_54	CACTCCGTTTCCTGGTCAG	KMT2D p.P2894S	-0.067879	0.5035082650559866	0.0797241	0.4315606455980165
PIK3CD_9	CCAAGAAGGCGGTGGGTCC	PIK3CD p.A414V	0.0235502	0.8288929074177083	0.0797087	0.46438952364968705
KEAP1_24	CAGGTGCCGCGGAGCGGCC	KEAP1 p.P361L	0.0165427	0.8233996030623897	0.0796234	0.2825441559648303
RB1_119	GAATCCTATATGAAACATG	RB1 p.X565_splice	0.00568252	0.9750731952300448	0.0794642	0.6619119315383608
FGFR1_5	CTGCAGCTTCGCTGTCGGC	FGFR1 p.R87C	0.028327	0.701101	0.0793742	0.281975
RB1_100	CATTATGTCAGAAATTAAA	RB1 p.Q62*	-0.277403	0.19345897811127197	0.0793051	0.708742
MGA_22	GCCAATGAGCGGCGGCGGC	MGA p.R2433W	0.0900834	0.3294260255212314	0.0792127	0.3912568835364445
RAF1_1	GGTCGACATCCACACCTAA	RAF1 p.S257L	-0.138234	0.26956990705358946	0.0791794	0.5263343863180365
ARID1A_46	ACTGAGCGCCGACCAGCAG	ARID1A p.R1446*	0.15177150773011022	0.1578320834097769	0.0790588	0.4622209661706896
CASP8_9	CAAATTTCTGCCTACAGGT	CASP8 p.S158F	0.0581398	0.6843055786446701	0.0790229	0.5805121467925896
GATA3_12	GGATCCCTACCCTGGCTGG	GATA3 p.S93F	-0.0839063	0.480044	0.0789837	0.5056500615190227
PREX2_1	ATAGATTTCGCTATGATGA	PREX2 p.R463C	-0.184361	0.33307889290069825	0.0789429	0.6778434426408226
TP53_113	CCACCACACTATGTCGAAA	TP53 p.V216M	-0.0892792	0.406152	0.0787989	0.4626035391785349
CTCF_3	ACTGGAGAGCGTCCGTTTC	CTCF p.R377C	-0.133217	0.16017197367061975	0.0786594	0.40624053261744936
CDKN2A_98	GTGGCCAGCCAGTCAGCCG	CDKN2A p.W15*	0.058738118638157553	0.5185473622118755	0.0786336	0.3873989632907384
STK11_6	ACTTCTGTCAGCTGATTGA	STK11 p.Q159*	-0.0557934	0.7089840630937865	0.0786193	0.5985683443382512
TP63_25	GGAGAATTCGTGGAGCTGC	TP63 p.E609K	0.0127732	0.9008949948842672	0.0786094	0.44320218642630993
PTEN_32	TCCTCAGTTTGTGGTCTGC	PTEN p.Q214*	0.0494054	0.6768681040491391	0.078481	0.5079439695130705
PAK5_58	TCATCGCCGACAAGGTAGC	PAK5 p.D517N	-0.0713758	0.5528707873576102	0.0784395	0.5137928011536445
RB1_34	TATGGCTTACGTTAAAATA	RB1 p.X405_splice	-0.272528	0.2467931963493599	0.0783227	0.7381495392953036
PTEN_64	TACCCAAAAGTGAAACATT	PTEN p.W274*	0.0632033	0.7609495079240463	0.0782445	0.7064681039293856
KMT2B_9	CTCCCCTTTGTGATCAAGT	KMT2B p.P302L	0.1599996222804839	0.39535977367398417	0.0781982	0.6780900774170231
PTPRT_71	TGCCATACCTGATAGAAAT	PTPRT p.X162_splice	-0.0290248	0.8928500821999766	0.0781887	0.7164251603018472
INHBA_8	GCCTCTTCCCCTGTGTCCA	INHBA p.E190K	0.0373203	0.763679	0.0781073	0.5291331218512436
KMT2C_40	ACAACTTACTTTGCATTTC	KMT2C p.X433_splice	-0.0897994	0.5170579724831963	0.0780775	0.5724927165056105
SMARCA4_4	AGAGCTCGGGAAGCTTGTT	SMARCA4 p.E920K	0.041533	0.7337995410572082	0.0780482	0.5227210346691489
NF1_8	AACTTCGAAGTGTGTGCCA	NF1 p.R1362*	0.20938225017714596	0.2159711214992856	0.0779803	0.6453597050658908
EPHA7_27	GAAGCGGAAAACGCCCCCA	EPHA7 p.A242V	0.0429263	0.651394	0.0779222	0.4120446179884986
TP53_64	CTATGTCGAAAAGTGTTTC	TP53 p.R213Q	-0.151655	0.26131992430674733	0.0778708	0.5633070591914846
NTRK1_10	ACATCGTTCTCTGCCCAGC	NTRK1 p.D270N	-0.140672	0.16573695823632748	0.0775336	0.44404563233440913
TP53_177	CAGGGGCCAGGAGGGGGCT	TP53 p.W91*	0.00739088	0.941952	0.0774654	0.4451528212374114
MAX_5	CTCACCTTGCTGCTCCAGA	MAX p.X99_splice	0.15049625625614632	0.15205597282922764	0.0774532	0.4613893726571893
FOXL2_3	CCGCCCTCGCGCGGCACCT	FOXL2 p.E118K	0.0710408	0.2076608180693041	0.0773735	0.1700292787350038
PREX2_19	TTTCGTGGCCGGATCAACA	PREX2 p.R297C	-0.0136144	0.909952	0.0771608	0.5212020955001075
PTPRS_55	GTGGTGCGGCAGCGCACGC	PTPRS p.R610W	0.067194	0.46042899932672376	0.0770259	0.39747519875426696
KMT2D_8	GAAGGCCTCCTTTGGGGCC	KMT2D p.S3184F	-0.0422817	0.6333862526483494	0.0767841	0.3859427125564352
GRIN2A_2	TTTAAATTCCTGCAGCAAT	GRIN2A p.S1447F	-0.0282368	0.8894838616815639	0.0767279	0.7055247537861746
CDKN2A_53	TACCTGGTCTTCTAGGAAG	CDKN2A p.G106S	0.10779217042535494	0.561242	0.0767268	0.6793386917763078
ATM_10	AACGAAATCTCAGGTGAGC	ATM p.R2993*	0.0783386	0.5757554750722087	0.0766968	0.5838769330016071
PPP2R1A_14	TAGGACTCGGTGCGGCTGC	PPP2R1A p.S219L	0.0784981	0.3896235847503245	0.0766332	0.4010551157315303
NTRK3_22	CATCGCCGCACACTCCATA	NTRK3 p.D609N	-0.073027	0.5029135174660747	0.0766065	0.4817631871592348
CDKN2A_5	CGTCGTGCACGGGTCGGGT	CDKN2A p.D84N	-0.0407453	0.6797627403823416	0.0762714	0.43923423200517486
FAT1_2	TAGATCGAAGTAACCAAGC	FAT1 p.R1627*	0.0585624	0.7605418448690637	0.0762128	0.6916462098353029
RAD50_12	GCGGCGTGATGAAATGCTG	RAD50 p.R726C	0.07123	0.5888059814747801	0.0762071	0.5630642612003967
CDKN1B_1	AATTCCACTTGCGCTGGCT	CDKN1B p.W60*	0.088844	0.4420526997529658	0.0759323	0.5112758809181237
CIC_9	CACCGGGCCCTGGTCCACC	CIC p.R215W	0.11880860786784252	0.1778890495448075	0.0759236	0.3895006506246744
PLCG2_20	TGGTGGAGCGGATCCGGCA	PLCG2 p.R589H	-0.0621755	0.5368562143747213	0.07586	0.45060499472029825
CDKN2A_38	GTCTGCCCGTGGACCTGGC	CDKN2A p.P114L	0.14285683744892144	0.11265023279313288	0.0757398	0.400675
SMAD3_26	GACACGGAGACACATCGGT	SMAD3 p.R287W	0.34513510438609735	0.0301059	0.0757055	0.6350006742714882
KDM5C_12	CCCCTACGACAGTCTGTGC	KDM5C p.R198*	0.00757496	0.9501881891463546	0.0756904	0.5323148781733413
MED12_10	CTTCGAGGGTCCGCTGGAG	MED12 p.R585Q	-0.0418864	0.5756331253994065	0.0756447	0.31160619529405054
NF1_53	GTTAAGAGGCGAATGTCCC	NF1 p.R816*	0.0329507	0.8288495178047118	0.0755708	0.6199958949645779
TSC1_12	TAAAACGCTCATAGAGTAA	TSC1 p.R706H	0.11232989663370342	0.5272995196359247	0.075465	0.6712337356778714
KMT2C_35	CAGATTCGTAAACAACAGA	KMT2C p.R3252C	0.034628	0.8419680741850661	0.0752918	0.6645967828223793
PTPRD_17	CATCCAGTTGTTGACATGT	PTPRD p.W466*	0.1882702360681191	0.2558054958317309	0.0752435	0.650166
KMT2D_1	CTCGACCTCAGGGCCCACC	KMT2D p.R4282*	-0.00776725	0.9403935514780936	0.0751788	0.46906560422746024
PLCG2_4	GACGCACCTGCGCTGCGCC	PLCG2 p.T620M	-0.103041	0.16853165441253562	0.0751669	0.31456776240552325
BLM_8	AAGTTTCCTTCTGTTCCGG	BLM p.P822S	-0.107823	0.388117	0.0749463	0.5480776337527519
PTPRD_44	GCATCCGCCAGAAGTCTTC	PTPRD p.R1730Q	0.13085536390447602	0.2320307786448026	0.0747918	0.4947934964834109
GRIN2A_91	CTATCTTCGGTCGTCCTTG	GRIN2A p.R1402W	0.13355520647322766	0.21624843334597227	0.0747693	0.4890594755442952
JAK3_10	CTCGGGAGGGGGCTGATGG	JAK3 p.R657W	0.019871426924824048	0.8665630886705696	0.0745678	0.5282099997728437
STK11_38	CCAGGTCGGAGATTTTGAG	STK11 p.D194N	-0.0456765	0.6738040720461962	0.0745397	0.4916671772559145
ATM_15	CACGTTCAGCTACTTTGTT	ATM p.R3008H	-0.0727486	0.626498	0.074516	0.617629
KMT2D_6	CTCCTTTGGGGCCACGGGA	KMT2D p.S3184F	0.0238999	0.8244588636208887	0.0744726	0.4893191510467611
PIK3CG_8	GCGGCGGACTTCTACCACC	PIK3CG p.A85V	-0.099707	0.4079590338775802	0.0744563	0.5359394567830478
AKT1_8	GATGTACTCCCCTACAGAC	AKT1 p.E17K	0.2197922819190232	0.19866903610917755	0.0743904	0.6639374732272347
CDKN2A_94	GCCGGGGCGCGGCTGGACG	CDKN2A p.A102V	0.0865579	0.2697979891481943	0.0743896	0.34307155973205233
NUP93_14	TGCTTGCGGCGGCTGAACT	NUP93 p.R524W	-0.0214188	0.8507125506933401	0.074386	0.5130868379370421
TBX3_7	AGCGGCCCCGGGACAGCGG	TBX3 p.R421W	0.0123395	0.8837749732448612	0.0742432	0.3789599618371208
PTPN11_22	TTTGCCACTTTGGCTGAGT	PTPN11 p.A72V	0.1312832316274331	0.30507615744217004	0.0742169	0.5622227823356047
EGFR_29	CACACGTGGGGGTTGTCCA	EGFR p.V774M	0.0446507	0.6364105354889067	0.0741413	0.4324473117322081
SMARCA4_82	CCGCGCCTCATGGAGGAGG	SMARCA4 p.R1336C	-0.107274	0.31992975487430786	0.0740252	0.49189171657937936
SMARCA4_91	GGTGCGTTAAACCACTGCT	SMARCA4 p.A945T	-0.0506705	0.7265736366408526	0.0737039	0.6106254151628072
GNAS_13	GAAGGAGTGCGTGCCTGCT	GNAS p.R160C	-0.0716079	0.3824468930739512	0.0736705	0.3682633118708472
ATM_65	GTTTTCCGTTACTTCTGCA	ATM p.R2832C	-0.160472	0.3002594673944972	0.0736187	0.6339981437200781
PTPRT_94	ATCGCACCACCACAGGCAC	PTPRT p.R328C	0.2574762785857351	0.00355377	0.0735715	0.4060737431958487
CDH1_8	TGCACCGGTCGACAAAGGA	CDH1 p.R63*	0.16356179021264586	0.10089975815887324	0.073445	0.4619782605586958
CDH1_5	CTGCCAGGAGCCGGAGCCC	CDH1 p.Q23*	0.097069	0.33658937239884923	0.0733934	0.4676221769853704
INSR_3	TTCCTCGACCAGCGTGCCC	INSR p.S784F	0.11552893923324752	0.2338089121388428	0.0733787	0.44973494609632175
GRIN2A_33	TATATTTCGGAGCATGTTA	GRIN2A p.S1425L	-0.0190913	0.9468077619364048	0.0733738	0.7974917725317765
FLT1_12	TACGGTTTCAAGCACCTGC	FLT1 p.V347I	-0.124922	0.3022920808988752	0.0732894	0.5441984830825912
CDKN2A_76	AGGGCTTCCTGGACACGCT	CDKN2A p.P146S	-0.156133	0.1489875024308781	0.0732889	0.4973468016726013
RBM10_24	GCTCAACAGGTGAACACCA	RBM10 p.Q571*	0.10593512598444128	0.3859554183802608	0.0729176	0.5508987840509985
IGF1_9	GCATGTCGGTGTGGCGCTG	IGF1 p.D128N	-0.0315848	0.7179798867626752	0.072892	0.4042403702343625
HIST3H3_15	TGGCGCTTCGCGAGATCCG	HIST3H3 p.R50C	-0.0294031	0.7590628372227834	0.072882	0.4466974891554993
HIST1H2BD_2	CTCGCCTGCGATGCGCTCG	HIST1H2BD p.E77K	-0.041737	0.5677406531052103	0.0728284	0.31826747849929765
PTEN_52	ACATCGGGGCAAATTTTTA	PTEN p.R142W	0.0283622	0.8554520389252346	0.0728174	0.6399266809245243
CDH1_34	GTTCAAGCTGCTGACCTTC	CDH1 p.Q346*	-0.120614	0.29305628333999034	0.0727694	0.5251244390454954
CDH1_21	GCTGGACCGAGAGGTCAGG	CDH1 p.R335*	0.14878001926464088	0.16100393590486714	0.0726754	0.49405536662796334
PIM1_12	CCCTTTCCGTGATGAAGTC	PIM1 p.E135K	-0.145023	0.26404832212223384	0.0724331	0.5762656323454625
PTPRS_32	GCCACGCAGGTGATGTTCA	PTPRS p.V267M	0.20157665121174764	0.1995308908818958	0.0724095	0.6453307574190132
AXL_11	TTTCGTCAGGCTCCTGGGC	AXL p.E818K	0.0272101	0.7626909454222499	0.0723501	0.4219381323120364
PTEN_53	CATCGGGGCAAATTTTTAA	PTEN p.R142W	-0.0648887	0.675308	0.0722822	0.6403905556884266
EPHA3_7	GTGAACTTGCGGTAGGCTA	EPHA3 p.R799H	-0.0489654	0.7415203211131898	0.0722766	0.6260346589240151
PPP2R1A_8	GCGGCGGGCCGCAGCCTCC	PPP2R1A p.R183W	0.0573179	0.5024510253320646	0.0722406	0.39796628822951285
MAP3K13_5	GGATGGCGCCAGAGGTGAT	MAP3K13 p.A321V	-0.0419356	0.7229763505532666	0.0721406	0.541543
AXL_3	AACGGGTCTCCTTCTTTCG	AXL p.R480H	0.0962718	0.3227051689439337	0.0720328	0.45954077010794686
RXRA_2	TGCGCTCCATCGGGCTCAA	RXRA p.S427F	0.10471428288529055	0.2929852512544798	0.0719589	0.4700923836580008
CDKN2A_70	TCCTCACCTGAGGGACCTT	CDKN2A p.X153_splice	0.0891682	0.5543357192809366	0.0718446	0.6339258746747576
RB1_60	TCTCCGGCTAAATACACTT	RB1 p.R661W	-0.056679	0.6736966320502247	0.071778	0.593376
ERBB4_38	AGTTTCGTTACCTGCCTCT	ERBB4 p.R95C	0.0165398	0.8868289814214771	0.0717325	0.5369636404465108
RB1_69	TTCATTTCAGTTAATGCTA	RB1 p.Q217*	-0.347691	0.11775621478969268	0.0716631	0.7458599384742015
NF1_52	AGGCGAATGTCCCATGTGA	NF1 p.R816*	-0.102751	0.442248	0.0715385	0.5919298582835071
IKZF1_35	CTTTCCTTCCCTGATGAGA	IKZF1 p.E16K	0.0930016	0.409419	0.0713177	0.527223
PIK3CA_10	TTTCAGAGAGAGGATCTCG	PIK3CA p.E542K	-0.303851	0.12504213529354913	0.0710815	0.7190707130029622
TP53_325	GAGCAGCGCTCATGGTGGG	TP53 p.R181H	0.00616001	0.9597989705853166	0.0709426	0.5613822253205623
FBXW7_51	GTGGTAACCGAATAGTTAG	FBXW7 p.R393*	0.2939036002518169	0.368913	0.0709186	0.8286761828221231
PIK3CG_14	CTGACGTCAGTGACGTCAT	PIK3CG p.V165I	-0.134753	0.336594	0.0709156	0.6123545325244368
ERBB4_37	CAGTTTCGTTACCTGCCTC	ERBB4 p.R95C	-0.0872508	0.34069881462930995	0.0709024	0.4380834658852499
PAK5_17	CTGTTCTTCATTCATTCTG	PAK5 p.E542K	-0.125613	0.45537590850595167	0.0708902	0.6730728011878755
AR_13	CCCTCAGGGGCTGGCGGGC	AR p.Q488*	0.00307549	0.9754436353526936	0.0705459	0.479966
TP63_5	CAATTTCGACATGCGATCT	TP63 p.R594*	0.17132321182174887	0.10195045180268002	0.0705446	0.5013495741924205
NTRK2_4	TGTTTCGGGTAAAATTGCT	NTRK2 p.R124Q	0.14286539031433773	0.2440710214115766	0.0703945	0.5664069725835711
RB1_103	ATTCAAAAGAAAAAGGAAC	RB1 p.Q93*	-0.20219	0.3697032566711119	0.070385	0.7544033926547764
PTPN11_7	GGTGCGGTCTCAGAGGTCA	PTPN11 p.R498W	0.0287933	0.8748882734847783	0.0702336	0.7008922921179439
NOTCH4_37	TGCTTCCTGGGTGGCAGGG	NOTCH4 p.G487E	-0.0364211	0.7797621538049404	0.0701573	0.589778
H3F3C_9	GGACCGTGGCGCTTCGAGA	H3F3C p.A47V	0.0610227	0.44492313148122054	0.0700994	0.38027877290163614
PAK5_27	ATCGGGCTATTCCTCAAGC	PAK5 p.S364L	-0.020778	0.855048	0.0699877	0.5381155754327122
APC_42	AATCGACATGATGATAATA	APC p.R805*	-0.212736	0.24940075336274703	0.0698621	0.7045074451771578
KMT2D_49	AGCCTTCCGGGACTTGCGG	KMT2D p.R3539Q	-0.103325	0.1691174960834836	0.0697722	0.3522453251938104
MEN1_4	GCTGTTCCATATGACATCG	MEN1 p.W126*	0.27575977727801554	0.0330942	0.0697506	0.5908604625062404
MTOR_20	CATTGACATGACCGCTAAA	MTOR p.M2327I	-0.0840152	0.4238115461269893	0.0696502	0.506756
TP53_180	GACAGGGGCCAGGAGGGGG	TP53 p.W91*	0.10380989465948028	0.6025976040870762	0.0696234	0.727023
DDR2_18	AGTTTCGTGTGGCCAGATC	DDR2 p.R714Q	-0.00983806	0.9386718732532838	0.0695456	0.5862726180135145
NTRK3_10	TTCCGGTACATGATGCTTT	NTRK3 p.R745Q	0.15472427205857245	0.46193085168389136	0.0693647	0.7417717496715187
NTRK3_16	AAATCCTTCCGGGCAGCCA	NTRK3 p.R582Q	0.0716826	0.455674	0.0692527	0.47120463354442094
BRD4_7	GCGGCGCGGCGGAACTGCT	BRD4 p.A1230T	0.12994063004727993	0.17529721084218086	0.0691342	0.47115485512276134
SF3B1_15	TCTCTCGGCCTTCCACTCT	SF3B1 p.R594Q	0.1684504950425694	0.0735301	0.0691226	0.46323297009410896
ATM_23	TTCGTGTTCATATGTTCGT	ATM p.E2039K	0.00852401	0.9665784634754784	0.0690402	0.7342161462769032
TP53_198	AGCGCTGCTCAGATAGCGA	TP53 p.R181C	-0.0995259	0.4687695001177685	0.0688964	0.615489
PIK3CB_3	AGATCGCTCTGGCCTCATT	PIK3CB p.R847C	0.020363	0.8756161702621621	0.0686759	0.5975120225046806
GRIN2A_18	GCCTCATCACGCACGTGTG	GRIN2A p.T84M	-0.17267	0.12403812157804012	0.0686248	0.5398417905651385
CARD11_26	GGCCGCCAAGGTGAGGCGG	CARD11 p.A1046V	-0.190956	0.037881	0.0685657	0.4545958611512312
SOX17_3	CGCGGGTCCCTCGATTCCG	SOX17 p.P281S	0.025142	0.7537674232217165	0.0685539	0.3922988741501235
KMT2C_7	GCAAATGCGTCAGAAAAGT	KMT2C p.R1758C	0.0893731	0.573091	0.0683676	0.6665555642368106
MSI1_3	TTCGAGTCACCATCTGTTA	MSI1 p.R107Q	-0.185733	0.3076016547516847	0.0683128	0.7068883943718557
ALK_13	GGCGGCTGTGGGGCTGCTC	ALK p.A161V	0.0113658	0.9197002217566774	0.0682861	0.5446191673863463
GRIN2A_94	CCAATGAACCGGAACCCCT	GRIN2A p.R1169W	0.0829206	0.5791905856554288	0.0682626	0.6481056563036147
PTPRT_5	GTTCCGGGGCAGGAGCCCA	PTPRT p.R1220Q	0.111516	0.3718421121002419	0.0682604	0.5848644783005317
POLD1_6	AGGAGGCCGCCCACCTTGC	POLD1 p.G1001S	0.0172234	0.7916357839997882	0.0682598	0.2949689989926898
RET_16	CCTGCTTACGGAGGCAGTC	RET p.X587_splice	0.1202315665058912	0.22752950960686744	0.0681745	0.4941986055112019
CDKN2A_105	GAAGCCCTCCCGGGCAGCG	CDKN2A p.E88K	-0.0604768	0.4345783252373895	0.0681647	0.3780147487787236
RB1_68	CATTTCAGTTAATGCTATG	RB1 p.Q217*	-0.0385408	0.8525170765721638	0.0681308	0.7422247471485891
KEAP1_3	TGACGCCGAACTTCCTGCA	KEAP1 p.T277M	0.0179136	0.8608096086684589	0.0681017	0.504917
TP53_105	ATGGCGCGGACGCGGGTGC	TP53 p.R158H	0.0151684	0.8783094070705266	0.0680745	0.4919051646458567
DICER1_7	CATCTCCCAGGAATTCTAA	DICER1 p.D1709N	0.0455585	0.7459239266598294	0.0679461	0.6289218885327689
BAP1_7	GGCTCAGGAAGGTGAGGGG	BAP1 p.Q684*	-0.0876951	0.6384361485460839	0.0676622	0.7164080176748683
IKZF1_9	TTCGTTCTCCTTCTCGTAG	IKZF1 p.E304K	0.086892	0.5168916653876967	0.0675685	0.6143866886845344
EPHB1_5	TGTTTCCAGAGACTATGAC	EPHB1 p.P207S	0.16011766007847636	0.34352582966292716	0.0674175	0.6903395008207744
H3F3C_12	ATTCGTCGTTATCAGAAGT	H3F3C p.R52C	-0.108217	0.42449921839856775	0.0672083	0.6192300683958307
EGFR_31	CACGTGGGGGTTGTCCACG	EGFR p.V774M	0.264163	0.0054578	0.0670109	0.4818412953473879
KMT2C_22	CATAGCGAGTGCTCCAGTA	KMT2C p.R4590H	-0.0575746	0.6950474889518456	0.0669741	0.6481288905395464
BRAF_18	TTCTTCATGAAGACCTCAC	BRAF p.L584F	0.0562849	0.6710731135429886	0.0668919	0.6137902720341972
NOTCH1_32	CGGTCATGGCAGGTGGCGC	NOTCH1 p.D352N	0.14321918230233713	0.16810901830550212	0.0668713	0.5201997881210039
EGFR_11	GTGCCACCTGCGTGAAGAA	EGFR p.A289V	-0.0913101	0.3811853272296587	0.0668568	0.5208311296870539
ERBB3_16	CACGCGGAGGTTGGGCAAT	ERBB3 p.V104M	0.078002	0.46780720732039144	0.0667886	0.5342906730617002
GATA3_17	GTCGGGGGGCCACGCCAGC	GATA3 p.S142L	-0.0635485	0.47370532008454613	0.0667735	0.45092717370345287
PIK3R1_17	AACTCACCTGGGATGTGCG	PIK3R1 p.X475_splice	-0.0794333	0.5004411784147972	0.0666959	0.5711173462897046
PDGFRB_3	CCGGATTCGGGGTGCCCTG	PDGFRB p.S1092L	0.0947711	0.39567825680889207	0.0665556	0.5510390477681735
CDKN2A_4	GCGTCGTGCACGGGTCGGG	CDKN2A p.D84N	-0.119246	0.22182705997979457	0.0665156	0.49461120332135217
STK11_34	GGCAGATCCGGCAGCACAG	STK11 p.R304W	0.0962283	0.3942653320710885	0.066514	0.5561338718536448
IL7R_11	TCTTATGATCGGGGAGACT	IL7R p.D278N	-0.173746	0.21585729891794353	0.0663653	0.6353261915611894
IKBKE_1	TGGTGCTGCGCTGTGTGGG	IKBKE p.R117C	0.31137531801254803	0.0438708	0.0663519	0.668356
ARID2_17	AATTCAAAGTGAGACTAAT	ARID2 p.Q1313*	-0.164546	0.5711174437003737	0.0662703	0.8192446749078918
FLT1_24	ATAATTTCGGGGATTTCAC	FLT1 p.E144K	0.0119117	0.9432105818269928	0.066248	0.6918891265220622
PAK5_36	TCGGGCGGCCCTGCAGCTG	PAK5 p.A434V	0.0188667	0.8261500919121236	0.0661316	0.44121238745774166
RB1_77	AGGTCAGAACAGGAGTGCA	RB1 p.Q257*	-0.107624	0.35708199479868646	0.0659938	0.5716886369018657
IKZF1_41	TTCCTTCCCTGATGAGAAA	IKZF1 p.E16K	-0.0225738	0.8942766677069085	0.0659921	0.6974500686809016
STK11_33	GATCCGGCAGCACAGGTGA	STK11 p.R304W	-0.193053	0.0911503	0.0659097	0.5630422476383045
IKBKE_3	GTGCTGCGCTGTGTGGGTG	IKBKE p.R117C	-0.0599314	0.6027377975595767	0.06549	0.5691374246099478
CTCF_2	AGAGCGTCCGTTTCAGTGC	CTCF p.R377C	0.11965609989477514	0.210023	0.0654637	0.4932290117581354
IKZF1_34	GTTGCGCGCGTGCGGGGCG	IKZF1 p.A422T	0.0188696	0.8371684800833974	0.0654339	0.4759370878501721
CDKN2A_89	CACGGGTCGGGTGAGAGTG	CDKN2A p.V82M	0.10575640949005856	0.3940008010924252	0.0653928	0.598348
TCF7L2_47	CCCCGAGACGCCAAGTCAC	TCF7L2 p.R505*	-0.0993924	0.3276173985764882	0.065328	0.5194365720780383
NOTCH1_8	GGCCGCACAGGTGAGTGCC	NOTCH1 p.R365C	0.067236	0.4952127183597333	0.0653218	0.5076675220150803
ATRX_20	AACGAAAAAGTTCTACATC	ATRX p.R781*	0.20075868590012705	0.3172377704963643	0.0652662	0.7453123011538613
TP63_37	CCAGCAGTCGAGCACCGCC	TP63 p.S184L	-0.124365	0.27734115740534354	0.065183	0.5686610447298566
TP53_215	GTCTTCCAGTGTGATGATG	TP53 p.E258K	0.0961124	0.5697933891137035	0.0651765	0.7001016869947277
CHEK2_7	CTTTCGGATTTTCAGGGTA	CHEK2 p.R145W	-0.10077	0.471547	0.0650496	0.6415158101536633
TP63_36	CAGTCGAGCACCGCCAAGT	TP63 p.S184L	0.12485796008018356	0.1492451709167697	0.0650042	0.4530891630934781
SPOP_6	ATGCCCGTTGACTCTCTGG	SPOP p.R121Q	-0.0169734	0.8719243099360485	0.0649873	0.5368299482450992
PTPRS_36	AGCCGCGTCATCATGACGA	PTPRS p.R1492Q	0.08542	0.4661963848000425	0.0649657	0.5796076921852222
CDKN2A_44	CGTCTGCCCGTGGACCTGG	CDKN2A p.P114L	0.1404521012199122	0.15034171692346718	0.0648368	0.507112
APC_3	CACGAATGGACCATGAAAC	APC p.R283*	0.0742389	0.6509231284617317	0.0647201	0.6933185580388865
PRDM14_2	TTGTTTAGGCTGGAAGATT	PRDM14 p.S475N	-0.246877	0.12603194486721847	0.0646526	0.6876701333376293
ALK_27	CCTGGCGCCGCATCCCCTC	ALK p.R291C	-0.105124	0.15657507981597904	0.0646201	0.3831039294273716
ALK_24	ACCCATTTCGAGTGGCCCT	ALK p.R401*	0.1863017576289692	0.26271019028783754	0.0644489	0.6987417626447255
SMAD2_16	ATTTCGGTTAACATTGGAG	SMAD2 p.R321Q	-0.00434062	0.9815388711699464	0.0642701	0.73174
CARD11_11	CTTGTAGCGTCTGACGATG	CARD11 p.R576H	0.40402007943998414	0.00271492	0.0642367	0.634627
POLE_13	CCTCGGCCTCCTGGGAGAG	POLE p.E2038K	0.00100544	0.9915283586558568	0.0642286	0.4974454957404345
CIC_3	GGTCCGGTTGTCCTGGTTG	CIC p.R228Q	0.12840740822219807	0.3168351083535905	0.0641976	0.61698
MAP2K4_34	GAAACATCCCTTTATTTTG	MAP2K4 p.P365S	0.0417357	0.7578888042320319	0.0641232	0.6357778955701024
ERBB3_26	AGGTGCTTCGGGGGCCTAC	ERBB3 p.R475W	0.0393829	0.6957039160774943	0.0640346	0.5248220362509788
PIK3R1_2	AGTATCGAGAAATTGACAA	PIK3R1 p.R557*	0.15979033282112037	0.5018453976143362	0.063889	0.7885035787887367
EPHA7_11	AATTTCCATAACCAGCAGC	EPHA7 p.G524E	-0.0358134	0.7773022900571429	0.0638865	0.613579
TGFBR2_1	AGAGGCCCGTCTCACAGCC	TGFBR2 p.R553C	-0.109835	0.2900281363705671	0.0638207	0.5381825017512218
PMS2_6	CGAGCTCTCAGCTCGCTCC	PMS2 p.E5K	0.13504964238017084	0.1028909253490918	0.063819	0.4411274622914611
PAK5_15	TCTGTTCTTCATTCATTCT	PAK5 p.E542K	-0.220744	0.21139082832204092	0.0636558	0.7180176951426677
TP53_308	CACTCGGATAAGATGCTGA	TP53 p.V197M	-0.18994	0.23372385328024273	0.0636257	0.6894814864446351
ERG_2	GTAGCCGCCTTGCAAATCC	ERG p.R302C	0.0179176	0.8237631701262298	0.0635789	0.4292607713130662
PIK3CB_11	TAATTCGTGTTTTCTTTGG	PIK3CB p.R321Q	-0.135106	0.3604520478552034	0.0635189	0.6666098315994415
AR_18	GCCCCCTCAGGGGCTGGCG	AR p.Q488*	0.0250293	0.7322706403799686	0.0632038	0.38755773162378254
MTOR_10	GCAGGACGCTCACATTGCT	MTOR p.V21I	-0.0305302	0.7003589417897731	0.0630965	0.4260794249460802
GRIN2A_62	TTCTTACGGGTGCAAGGTG	GRIN2A p.X336_splice	0.352524	0.0539482	0.063061	0.7307093960393938
IDH1_10	ATGACGACCTATGATGATA	IDH1 p.R132H	0.5796463688441678	0.00319229	0.0630182	0.7499795307806423
IKZF1_21	GCTTCGCTGTTTATAGCTT	IKZF1 p.R213Q	-0.0423714	0.8097973412659962	0.0628562	0.7208313331312861
FGFR3_4	CCCCGTAGCTGAGGATGCC	FGFR3 p.G380R	-0.115901	0.221698	0.0628044	0.5070073141442617
TP53_114	ACCACACTATGTCGAAAAG	TP53 p.V216M	0.11737798738691284	0.5423006353198309	0.0627365	0.7447772857280852
PLCG2_22	GTCCTCGACGTAGTTGGAT	PLCG2 p.E825K	0.13208090480130094	0.3943909718980689	0.0624637	0.6873525933463145
AXIN1_3	GCCGAGCACCCTCCAAGCA	AXIN1 p.R723*	0.0444537	0.6511837283198054	0.062417	0.5255490135817806
ARID1A_41	ATTCCTCAGGTATCCAGCC	ARID1A p.Q1584*	0.15413170077353422	0.32806725148027605	0.0624081	0.6923241866614516
ERBB3_37	CTCGAATCCACTGTGACAG	ERBB3 p.R81Q	0.22833472263259696	0.0731434	0.0623339	0.6255550650930035
KIT_1	CCTAATCTCGTCGCCCACG	KIT p.E53K	-0.109295	0.3026679805715856	0.0622782	0.5564643633456176
NOTCH3_26	GGCGGGCCGCCAGGATCAG	NOTCH3 p.R1915H	0.0821359	0.3620145061083473	0.0621517	0.4905073729550022
ATM_56	ATTTCCTCCGAATATCAGC	ATM p.R924Q	0.0176639	0.9035462014072546	0.0621112	0.669943
TET1_7	AGAAAAATTCATTACCTCC	TET1 p.S487L	0.0365613	0.8416946788346953	0.0620699	0.7345530456523252
AMER1_25	AGTCCGAGAGACCCAGGCC	AMER1 p.R641*	0.17906253825478427	0.0532398	0.062052	0.5035746390509301
PDGFRA_23	TGAAGGCACGCCGCTTCCT	PDGFRA p.T440M	0.1319298253115678	0.0904961	0.0620298	0.4263926137282033
EGFR_12	GCTCGTGCGTCCGAGCCTG	EGFR p.S306L	0.0641131	0.6007922978698893	0.0618602	0.6137090288893308
JAK1_9	AATCGCACCATCACCGTTG	JAK1 p.R93C	-0.0486993	0.6202808085583595	0.061857	0.5287518866324045
PIM1_2	TCACCAGCTCTCCCCAGTC	PIM1 p.X80_splice	-0.0500195	0.5923659349819508	0.0618505	0.5075075785743672
GRIN2A_19	CACGCACGTGTGCGACCTC	GRIN2A p.T84M	0.0641208	0.5053656707608287	0.0618288	0.5208174598917774
RBM10_8	GCCGAGAGAAGTGCTTCAA	RBM10 p.R153*	-0.0494337	0.6740368499491949	0.0618169	0.5986616454509148
ERBB3_34	TTCTCGAATCCACTGTGAC	ERBB3 p.R81Q	-0.026282	0.8530311522963666	0.0617229	0.6632819134702457
SMARCA4_67	CGAGCCTCGGGTAAATTTG	SMARCA4 p.S1079L	0.0426968	0.6155071809306099	0.0616512	0.4683577193753232
DOT1L_3	CAGAACACGCCCCAGTACC	DOT1L p.T735M	0.071499	0.4333099077949939	0.0616442	0.4994684473104496
CDKN2A_83	GGGCCGTCTGCCCGTGGAC	CDKN2A p.R112C	-0.0548488	0.5592674479249824	0.0616354	0.5111773293292362
RASA1_11	CTTTTCGATAGTGATCTAT	RASA1 p.R427Q	0.0319925	0.8922787729017689	0.0615684	0.7943826137602291
GRIN2A_97	GGAGCACACGCCCGTGAAA	GRIN2A p.V852M	-0.0979679	0.3657791362646602	0.0613635	0.5705581538188795
ARID1A_35	GTATCCTCAGCCCCAGTCT	ARID1A p.Q581*	0.10201292028127006	0.41613115586308386	0.0613201	0.6252812402872595
NOTCH4_32	CTTCCTGGGTGGCAGGGCT	NOTCH4 p.G487E	-0.133013	0.3325685305830623	0.0613063	0.6547992084981334
NTRK3_24	TTTTGGAGCGGCCCCGAGT	NTRK3 p.R791W	0.1517598768775311	0.19302380808990835	0.0613036	0.5992443034354951
SF3B1_13	TTACCTTTCCTCTGTGTTG	SF3B1 p.G740E	0.15789977597348095	0.3624410171446235	0.0612602	0.7240161677743604
ERRFI1_3	AAGTTACTTCGAGCACCTA	ERRFI1 p.S307L	0.0795928	0.574819	0.0611922	0.6663989914670891
PIK3C2G_4	TACAATTTCATTGTAAGTG	PIK3C2G p.E1394K	0.31253863854903735	0.2732501643074224	0.0611466	0.8307389012469559
RNF43_21	GGTGAGCGAGGAGCCAGTG	RNF43 p.R132*	0.0107328	0.9372374019460694	0.0610916	0.6539143589519378
TGFBR2_20	GGTCGTGGTCCCAGCACTC	TGFBR2 p.D549N	-0.00640969	0.9495328838996407	0.0610115	0.5466437676113326
KMT2D_47	AACAGCGGCGAGGGCGCAA	KMT2D p.R1757*	0.0023211	0.9770190139874158	0.060907	0.4495269183642306
NTRK1_7	GCCCACATCGTTCTCTGCC	NTRK1 p.D270N	-0.156529	0.0749987	0.0608519	0.4879088004183835
FLT1_17	GTTTCCTTCTTCTTTGAAG	FLT1 p.E119K	0.0427834	0.7782088605350757	0.0608211	0.6888732604407015
MYCN_3	CCCCCCCGGGGGAGGACAT	MYCN p.P44L	0.0147383	0.9214978391993158	0.0606581	0.6849984768560143
APC_15	CTTGGCGAGCAGATGTAAA	APC p.R554*	-0.160849	0.3886269563095078	0.0606566	0.7447022221961982
TP53_51	AGACCTAAGAGCAATCAGT	TP53 p.X187_splice	0.0890419	0.7158698814559967	0.060624	0.8043414829993799
TCF7L2_46	TCCCCGAGACGCCAAGTCA	TCF7L2 p.R505*	0.10913336276654673	0.33495179335157765	0.0606125	0.5924755503807033
KEAP1_18	GTCCTCAATCGTCTCCTTT	KEAP1 p.R470C	-0.230142	0.10845047147211671	0.0605791	0.6717468826736848
BRAF_16	AGGATTTCGTGGTGATGGA	BRAF p.R389C	0.12817710840140634	0.3551739563003084	0.0604906	0.6629943179550055
PIK3CG_32	TGTTCGCTTTGGCTTTCGG	PIK3CG p.E267K	-0.0765727	0.3872977082474889	0.0604434	0.49442062244191914
ARID1A_6	TCCGACGATGCCTGATTGA	ARID1A p.R1722*	0.0499365	0.698185	0.0602928	0.6396816874157258
HNF1A_6	GTGCGCTATGGACAGCCTG	HNF1A p.R321C	0.0770122	0.5829381177328467	0.0599305	0.669236
TP53_244	AACTGGCCAAGACCTGCCC	TP53 p.A138V	0.0709691	0.43732317308604735	0.0598366	0.5126433926274753
TP53_240	AGCTGCACAGGGCAGGTCT	TP53 p.V143M	0.11472147730369332	0.42517220054370886	0.0598205	0.6776679682139535
ATM_18	GCAATATTACGAAATCCTG	ATM p.R337H	0.0527093	0.8206333866331736	0.0596393	0.797553
AMER1_3	CCAAGCGAAGTTCCTGCCT	AMER1 p.R358*	0.0660908	0.4596775302332477	0.0595803	0.5051819040817074
ARID1A_38	CACGACAGCACTATCCCTA	ARID1A p.R1276*	0.00335389	0.975246	0.0595785	0.5813820196911406
SMAD4_33	CATCGACAGATGCAGCAGC	SMAD4 p.R445*	0.12371657135841987	0.3700230125125006	0.0595613	0.6663596495281177
ANKRD11_1	GGGCGGGGTACGGCGCCTC	ANKRD11 p.A2017T	0.10639957135181548	0.28298957706989114	0.0594483	0.5490777426009983
[truncated: 3,852 more rows]

## Sheet: TP53_hits_guide_annotation
sgRNA	sgRNA_sequence_19nt	Repare_annotation	target_mutation	PAM
TP53_82	GTTACACATGTAGTTGTAG	TP53 p.C238Y	TP53 p.M237I	NGG
TP53_22	GAGTACTGTAGGAAGAGGA	TP53 splice	TP53 p.X126_splice	NGG
TP53_294	CTTCCCAGAAAACCTACCA	TP53 p.Q100*/S99F	TP53 p.Q100*	NGG
TP53_211	TTCCAGTGTGATGATGGTG	TP53 p.E258K	TP53 p.E258K	NGG
TP53_307	CCACTCGGATAAGATGCTG	TP53 p.V197M/R196Q	TP53 p.V197M	NGG
TP53_52	GACCTAAGAGCAATCAGTG	TP53 p.G187D	TP53 p.X187_splice	NGG
TP53_7	CCTCAGCATCTTATCCGAG	TP53 p.Q192*	TP53 p.Q192*	NGG
TP53_124	ACCCACAGCTGCACAGGGC	TP53 p.W146*	TP53 p.W146*	NGG
TP53_212	GAGTCTTCCAGTGTGATGA	TP53 p.D259N	TP53 p.E258K	NGG
TP53_182	CGCCGGTCTCTCCCAGGAC	TP53 p.R282Q	TP53 p.D281N	NGG
TP53_293	CCTTCCCAGAAAACCTACC	TP53 p.S99F	TP53 p.Q100*	NGG
TP53_158	CCCTTCAGGTACTAAGTCT	TP53 p.Q331*	TP53 p.Q331*	NGG
TP53_30	AACACTTTTCGACATAGTG	TP53 p.T211I	TP53 p.R213*	NGG
TP53_84	CACATGTAGTTGTAGTGGA	TP53 p.M237I	TP53 p.M237I	NGG
TP53_21	GGAGTACTGTAGGAAGAGG	TP53 splice	TP53 p.X126_splice	NNN
TP53_206	ATTCTCTTCCTCTGTGCGC	TP53 p.E287K	TP53 p.E286K	NGG
TP53_96	ATGTTCCGAGAGCTGAATG	TP53 p.R342*	TP53 p.R342*	NGG
TP53_147	TTGGCAAAACATCTTGTTG	TP53 p.C135Y	TP53 p.C135Y	NGG
TP53_222	CAGTCACAGCACATGACGG	TP53 p.S166L	TP53 p.Q167*	NGG
TP53_138	ATGGCCATGGCGCGGACGC	TP53 p.A161T/M160I	TP53 p.A161T	NGG
TP53_46	GGGAGAGACCGGCGCACAG	TP53 no_change	TP53 p.R282W	NGG
TP53_127	ATCAACCCACAGCTGCACA	TP53 p.V147I	TP53 p.W146*	NGG
TP53_26	AGGGGAGTACTGTAGGAAG	TP53 no_change	TP53 p.X126_splice	NGG
TP53_68	TGCACGGTCAGTTGCCCTG	TP53 p.T125M	TP53 p.T125M	NGG
TP53_24	GTACTGTAGGAAGAGGAAG	TP53 splice	TP53 p.X126_splice	NNN
